# Supplementary material for: Targeting the EIF2AK1 Signaling Pathway Rescues Red Blood Cell Production in SF3B1-Mutant Myelodysplastic Syndromes With Ringed Sideroblasts
Source: PubMed Central journal article supplement — Blood Cancer Discov. 2022 Aug 3;3(6):554–67. doi: 10.1158/2643-3230.BCD-21-0220 (PMC9894566; doi:10.1158/2643-3230.bcd-21-0220), 2022-08-03
Supplement: bcd-21-0220_supplementary_data_suppsf1-sf4.pdf [file bcd-21-0220_supplementary_data_suppsf1-sf4.pdf]

# Supplementary Figure S1

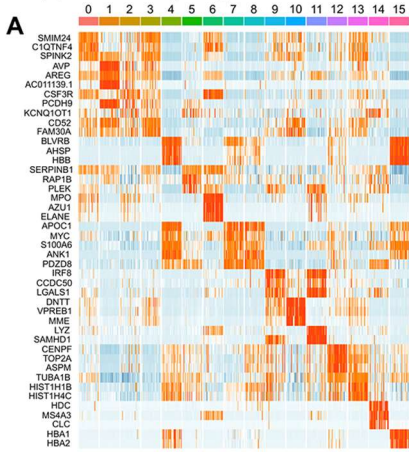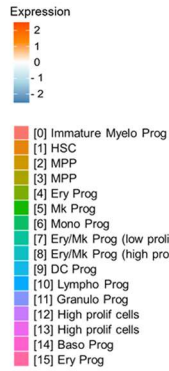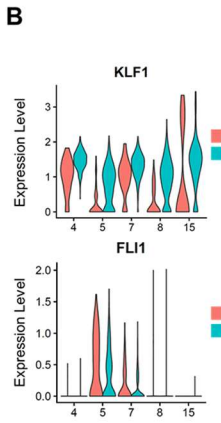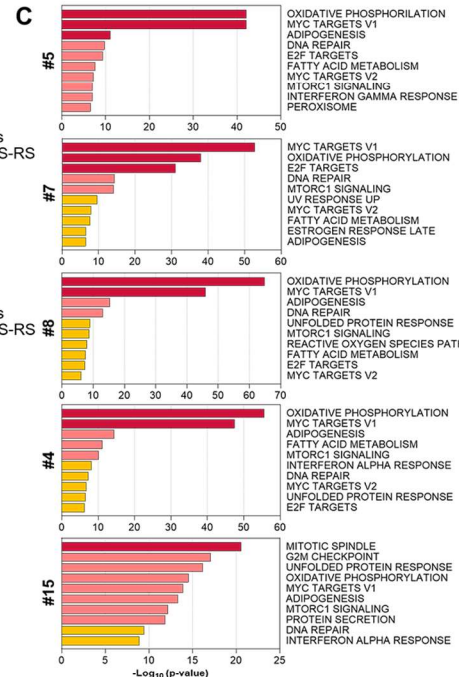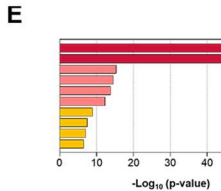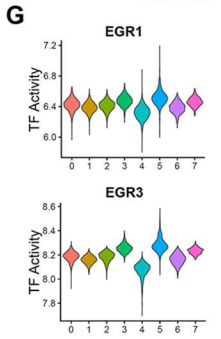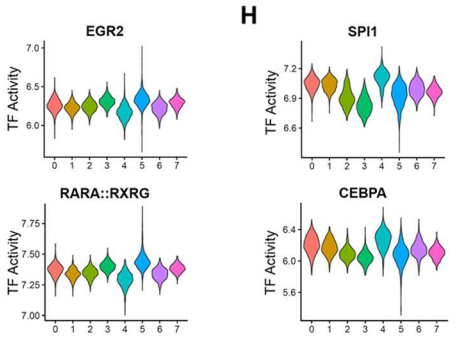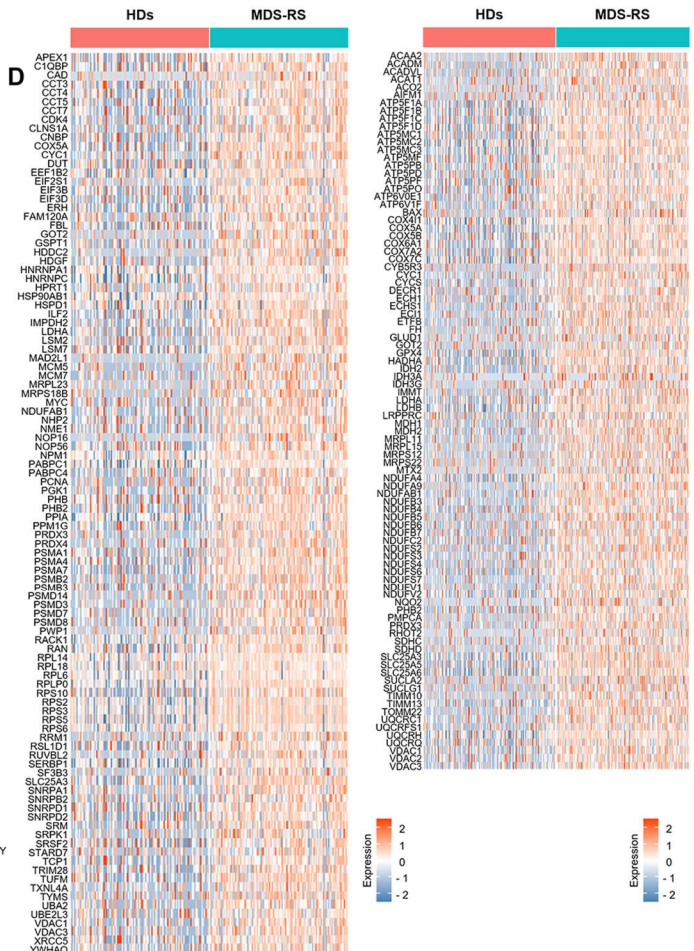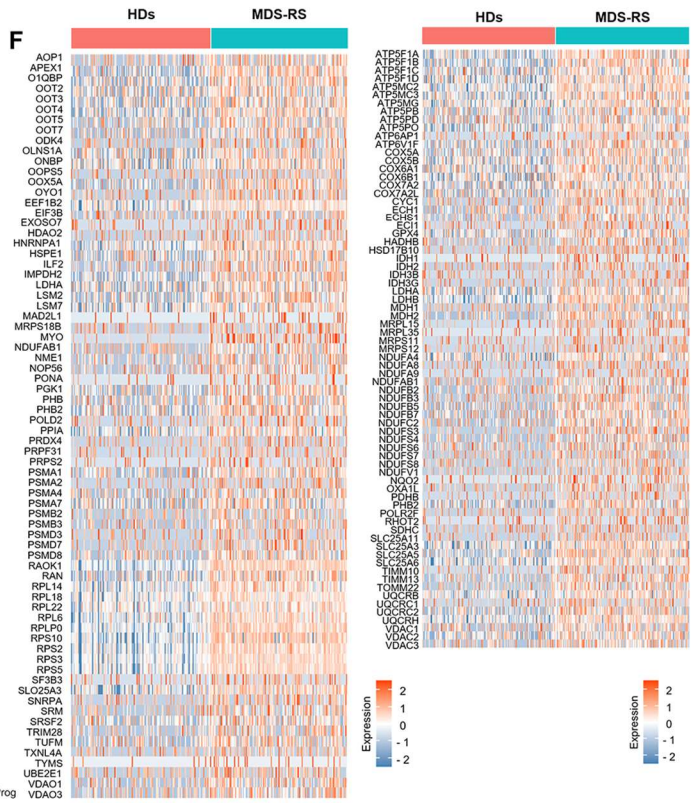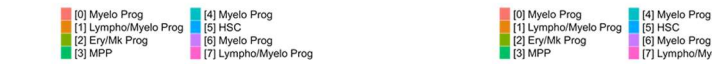

**Supplementary Figure S1. *SF3B1*<sup>MT</sup> do not affect erythropoiesis at the level of HSPCs**

**(A)** Heatmap of the expression of the top 3 genes enriched in each of the 16 clusters shown in Figure 1A. **(B)** Violin plots of *KLF1* (top) and *FLI1* (bottom) expression across the HD and MDS-RS Ery/Mk clusters shown in Figure 1A. **(C)** Pathway enrichment analysis of the genes that were significantly upregulated in MDS-RS Ery/Mk clusters 5, 7, 8, 4, and 15 as compared with the HD clusters shown in Figure 1A (adjusted  $P \leq 0.05$ ). The top 10 Hallmark gene sets are shown. **(D)** Heatmaps of the expression of the MYC signaling (left) and oxidative phosphorylation (right) pathway genes that were significantly upregulated in the MDS-RS erythroid/megakaryocytic cell clusters as compared with the HD erythroid/megakaryocytic cell cluster shown in Figure 1A. **(E)** Pathway enrichment analysis of the genes that were significantly upregulated in the MDS-RS HSC cluster as compared with the HD HSC cluster shown in Figure 1A (adjusted  $P \leq 0.05$ ). The top 10 Hallmark gene sets are shown. **(F)** Heatmaps of the expression of MYC signaling (left) and oxidative phosphorylation (right) pathway genes that were significantly upregulated in the MDS-RS HSC cluster as compared with the HD HSC cluster shown in Figure 1A. **(G)** Violin plots showing the activities of the TFs EGR1, EGR2, EGR3, and RARA:RXRG across the 8 clusters shown in Figure 1D. **(H)** Violin plots showing the activities of the TFs SPI1 and CEBPA across the 8 clusters shown in Figure 1D.



**Supplementary Figure S2. *SF3B1*<sup>MT</sup> arrest erythroid terminal differentiation and activate the EIF2AK1-induced response pathway to heme deficiency**

**(A)** Heatmap of the expression of the top 3 genes enriched in each of the 20 clusters shown in Figure 2A. **(B)** Distribution of HD (top) and MDS-RS (bottom) MNCs among the cluster groups shown in Figure 2A defined by distinct lineage differentiation trajectories. HSPC, hematopoietic stem and progenitor cells; Myelo, myeloid cells; Ery, erythroblasts; B-Lympho, B-lymphocytes; T-Lympho/NK, T-lymphocytes and natural killer cells; DC, dendritic cells. Arrows indicate the erythroblastic population. **(C)** Heatmap of the expression of representative surface markers (*CD34*, *cKIT*, *ENG*, *TFRC*, *CD36*, *EPOR*, and *GYPA*), transcriptional factors (*GATA1*, *GATA2*, and *KLF1*), and hemoglobin subunits (*HBB*, *HBA2*, *HBA1*, and *HBD*) across different stages of erythroid differentiation. BFU-E, phenotypic burst forming unit-erythroid cells; CFU-E, phenotypic colony formation unit-erythroid cells; Pro-E, pro-erythroblasts; Baso-E, basophilic erythroblasts; Poly-E, polychromatophilic erythroblasts; Ortho-E, orthochromatic erythroblasts; Pre-E, pre-erythrocytes. **(D)** UMAP plots of scRNA-seq data for single BM MNCs isolated from one patient with *SF3B1*-mutant MDS-RS at the time of diagnosis (n=2,608) and after EPO treatment (n=3,182). Each dot represents one cell. Different colors represent the sample origin (left) and cluster identity (right). HSPC, hematopoietic stem and progenitor cells; Myelo, myeloid cells; Mono, monocytes; Ery, erythroblasts; B-Lympho, B-lymphocytes; T-Lympho/NK, T-lymphocytes and natural killer cells. **(E)** Distribution of MNCs across the clusters shown in Figure S2D. **(F)** Left, representative flow cytometry plots showing the expression of integrin  $\alpha 4$  (CD49d) and band 3 in CD45-CD235a<sup>+</sup> erythroblasts from one HD BM sample (top) and one *SF3B1*-mutant MDS-RS BM sample (bottom). Right, frequencies of orthochromatic erythroblasts (Ortho-E) in CD45-CD235a<sup>+</sup> erythroblasts isolated from HD BM samples (n=3) and *SF3B1*-mutant MDS-RS BM samples (n=3). Statistically significant differences were detected using a 2-tailed Student *t*-test. Baso-E, basophilic erythroblasts; Poly-E, polychromatophilic erythroblasts. **(G)** Dot plot of the expression of the genes belonging to the EIF2AK1-mediated pathway that were significantly upregulated in the MDS-RS Pro-E, Baso-E, and Poly-E clusters as compared with the HD Pro-E, Baso-E, and Poly-E clusters shown in Figure 2B. **(H)** Dot plot of the expression of the autophagy pathway genes that were significantly upregulated in the MDS-RS Ortho-E cluster as compared with the HD Ortho-E cluster shown in Figure 2B. **(I)** Representative Western blot analysis of EIF2AK1 and phospho-EIF2S1 in parental and *SF3B1*<sup>K700E</sup> K562 cells treated with vehicle (-) or hemin (+) for 3 days. Vinculin was used as a loading control. **(J)** Left, number of autophagic vesicles per cell in 4 parental and 4 *SF3B1*<sup>K700E</sup> K562 cells. Statistically significant differences were detected using a 2-tailed Student *t*-test. Right, representative transmission electron microscopy images of one representative parental cell (top) and one *SF3B1*<sup>K700E</sup> K562 cell (bottom). Scale bars represent 2  $\mu$ m. **(K)** Left, number of autophagic vesicles per cell in 16 parental and 10 *SF3B1*<sup>K700E</sup> K562 cells after 3 days of hemin-induced differentiation. Significant differences were detected using a 2-tailed Student *t*-test. Right, representative transmission electron microscopy images of one representative parental cell (top) and one *SF3B1*<sup>K700E</sup> K562 cell (bottom). Scale bars represent 2  $\mu$ m. **(L)** Representative Western blot analysis of LC3B in parental and *SF3B1*<sup>K700E</sup> K562 cells treated with vehicle (-) or hemin (+) for 3 days. Actin was used as a loading control.

### Supplementary Figure S3

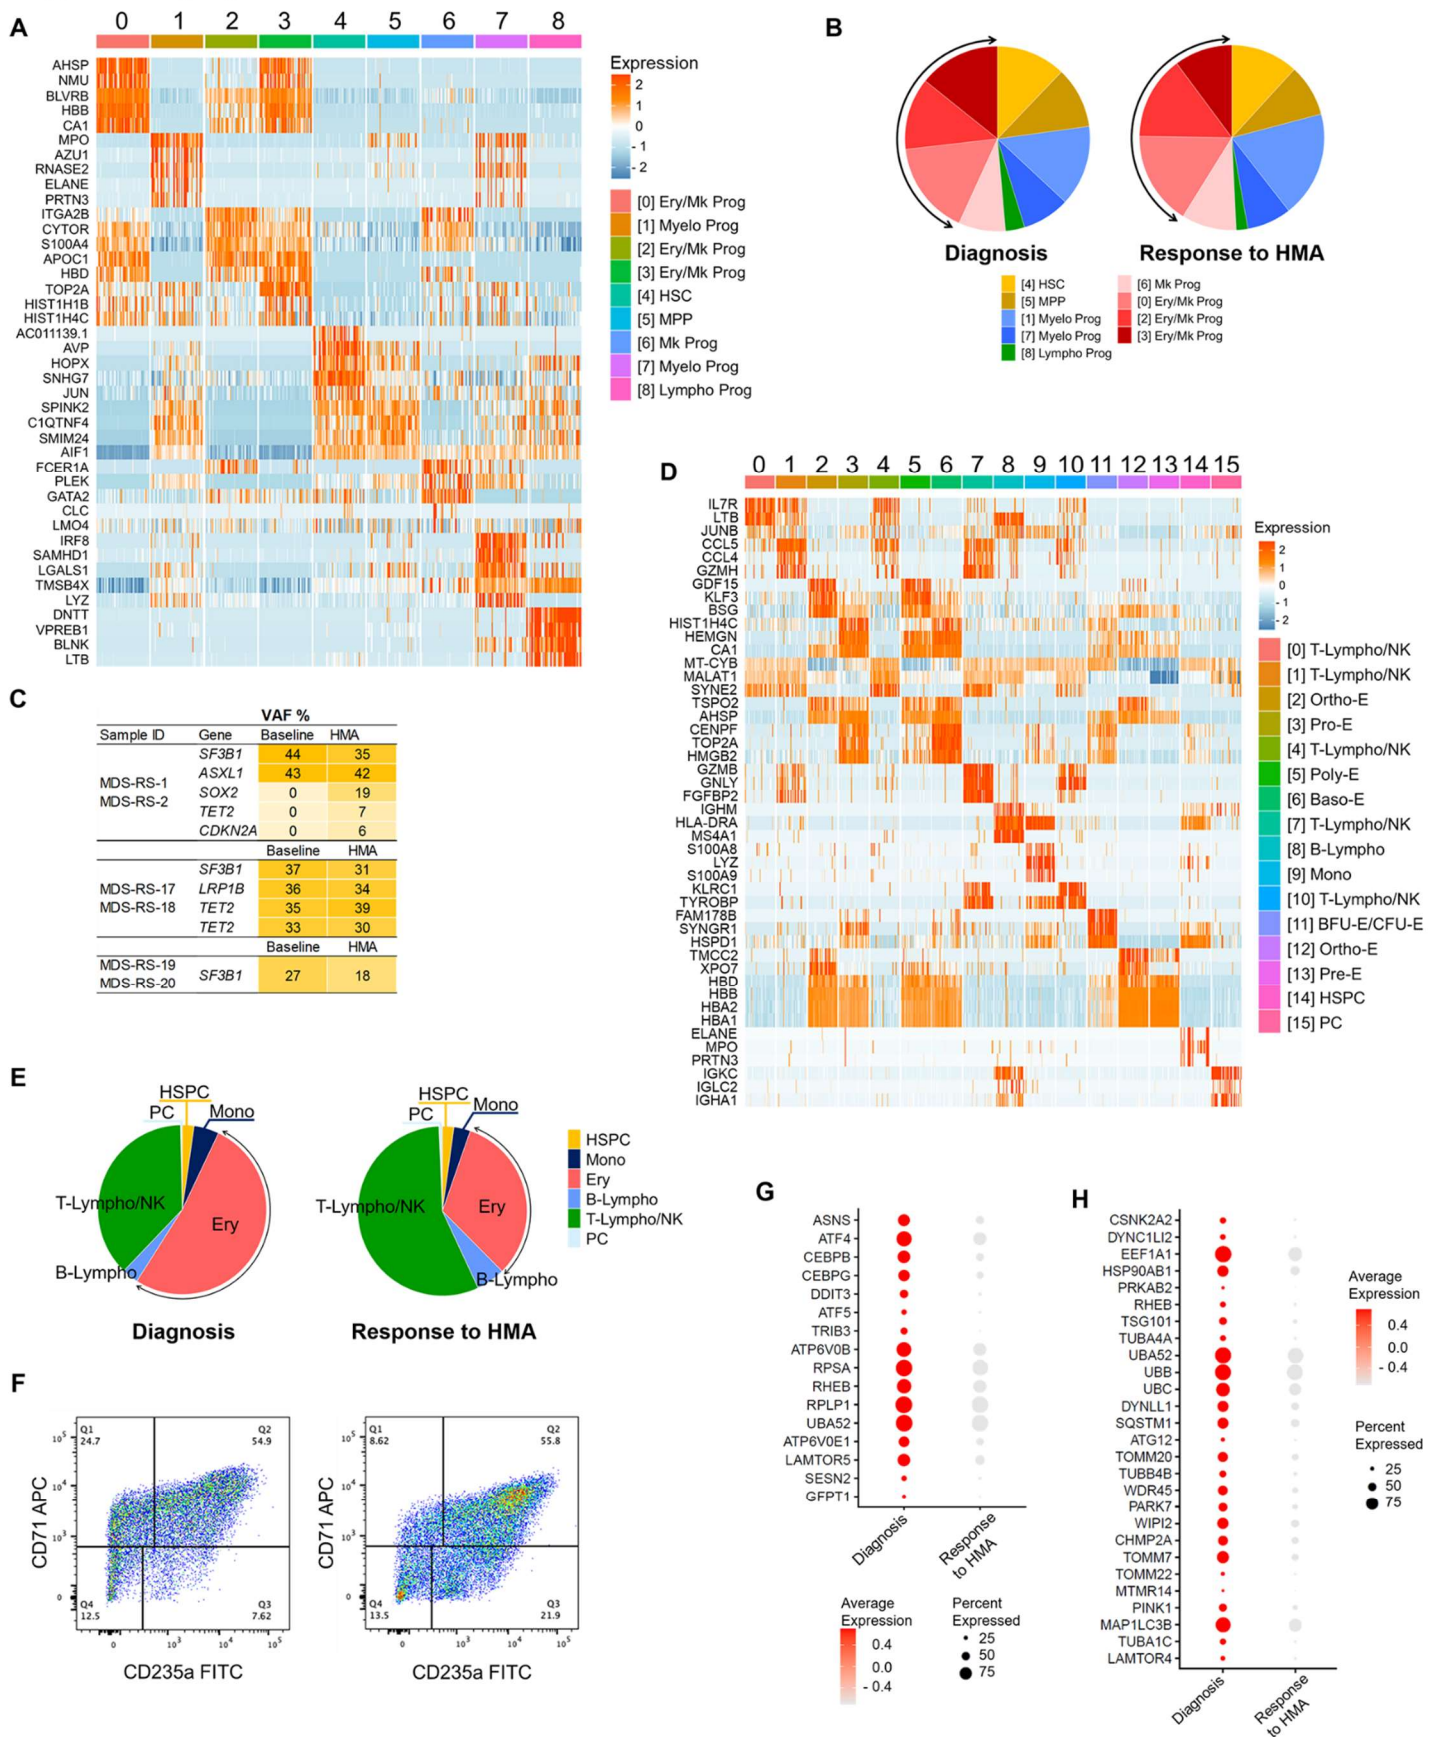

**Supplementary Figure S3. Hypomethylating agent therapy inhibits the EIF2AK1-induced response pathway to heme deficiency in terminally differentiated cells in patients who became transfusion independent.**

**(A)** Heatmap of the expression of the top 5 genes enriched in each of the 9 clusters shown in Figure 3A. HSC, hematopoietic stem cells; MPP, multipotent progenitors; Lympho, lymphoid; Ery/Mk, erythroid/megakaryocytic; Mk, megakaryocytic; Myelo, myeloid; Prog, progenitors. Arrows indicate the erythroid/megakaryocytic progenitors. **(B)** Distribution of Lin<sup>-</sup>CD34<sup>+</sup> cells isolated from MDS-RS patients at baseline (left) and at the time of response to HMA therapy (right) across the clusters shown in Figure 3A. **(C)** Variant allelic frequencies (VAFs) of somatic mutations in relevant leukemia driver genes and/or oncogenes detected in total BM MNCs from 3 *SF3B1*-mutant MDS-RS patients at baseline or at the time of hematological response to HMA therapy. **(D)** Heatmap of the expression of the top 3 genes enriched in each of the 16 clusters shown in Figure 3B. **(E)** Distribution of MNCs isolated from MDS-RS patients at diagnosis (left) and at the time of response to HMA therapy (right) across the clusters shown in Figure 3B. HSPC, hematopoietic stem and progenitor cells; Mono, monocyte cells; Ery, erythroblasts; B-Lympho, B lymphocytes; T-Lympho/NK, T lymphocytes and natural killer cells; PC, Plasma cells. Arrows indicate the erythroblast population. **(F)** Flow cytometry plots showing the expression of CD71 and CD235a in primary CD45<sup>-</sup>erythroblasts derived from *SF3B1*-mutant CD34<sup>+</sup> MDS-RS cells cultured in erythroid differentiation media for 8 days and then treated with vehicle (left) or 5-azacitidine (right) for 3 days. **(G)** Dot plot of the expression of the genes belonging to the EIF2AK1-mediated pathway that were significantly downregulated in MDS-RS Ortho-E at the time of response to HMA therapy as compared with the time of diagnosis. **(H)** Dot plot of the expression of autophagy pathway genes that were significantly downregulated in MDS-RS Ortho-E at the time of response to HMA therapy as compared with the time of diagnosis.

# Supplementary Figure S4

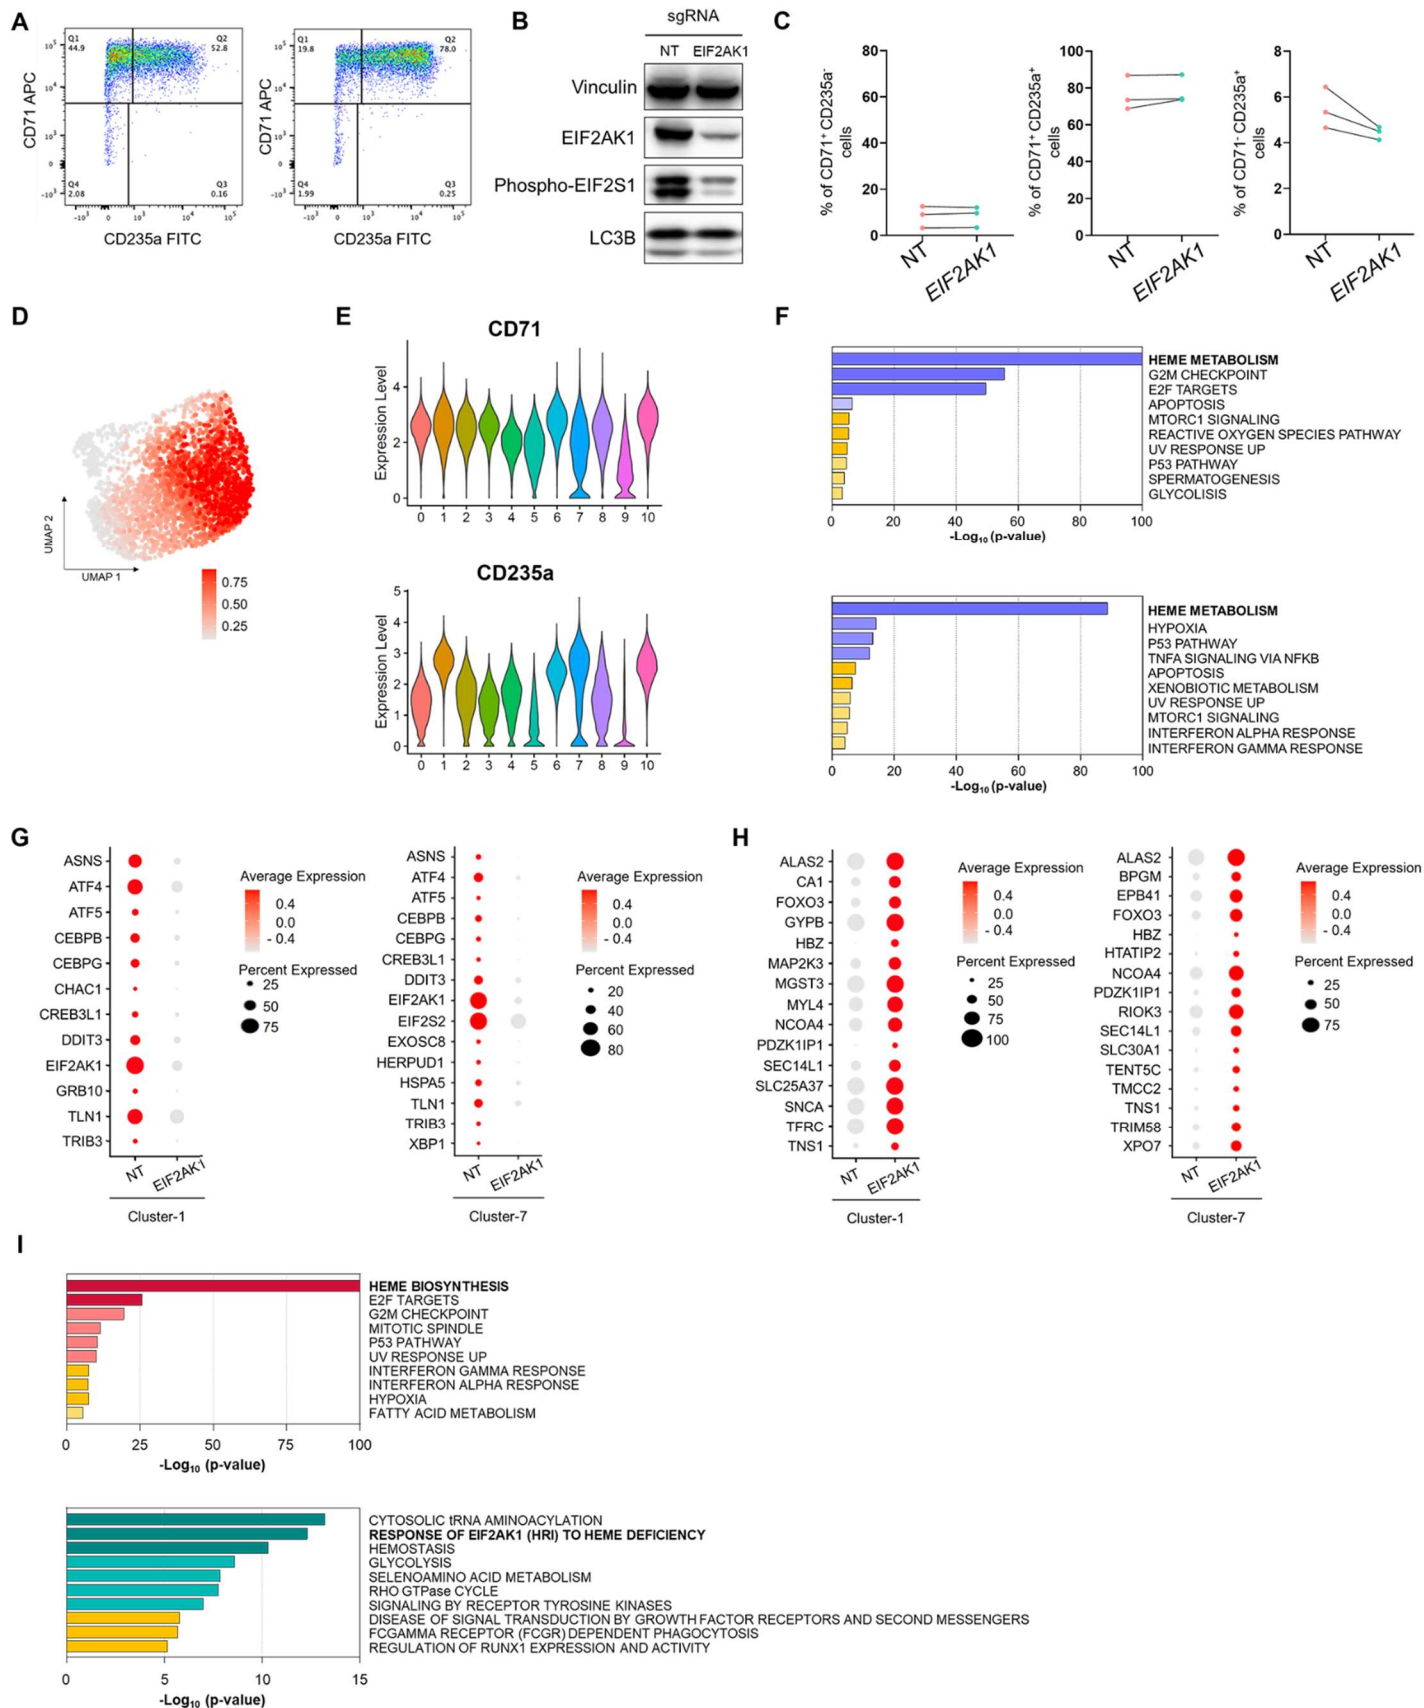

J

MDS-RS-3bis MDS-RS-13 MDS-RS-14

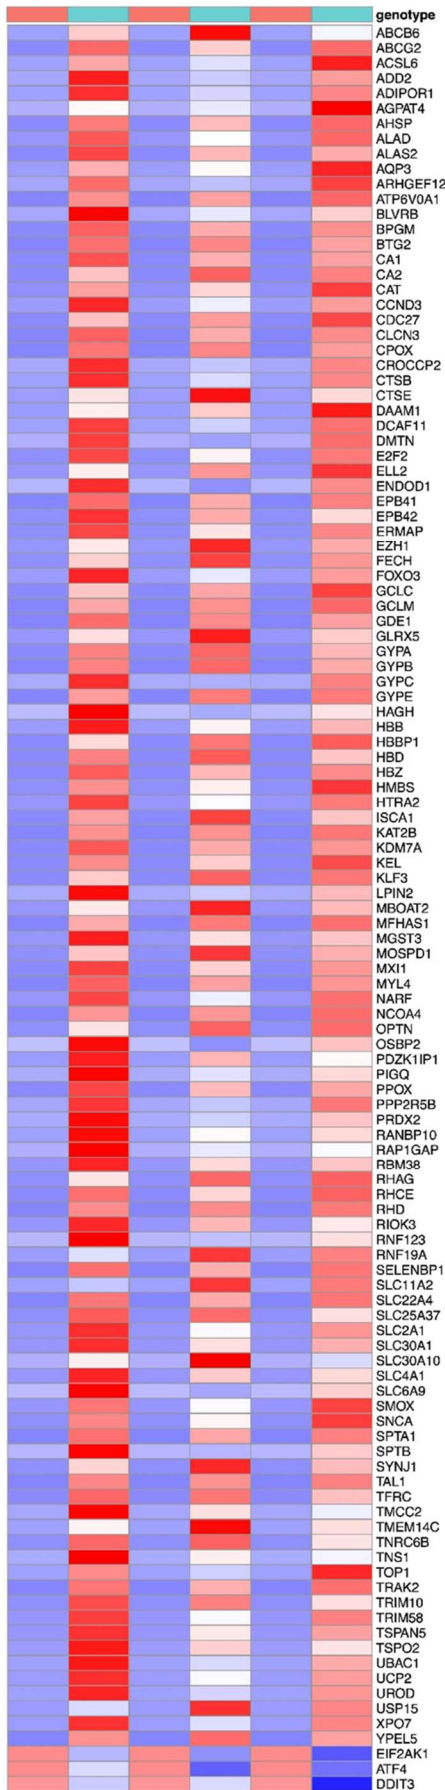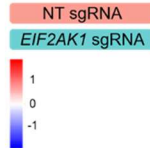

K

| Sample ID    | Gene  | VAF % |         |
|--------------|-------|-------|---------|
|              |       | NT    | EIF2AK1 |
| MDS-RS-3-bis | SF3B1 | 14    | 12      |
| MDS-RS-13    | SF3B1 | 16    | 15      |
| MDS-RS-14    | SF3B1 | 36    | 42      |



**Supplementary Figure S4. Inhibition of EIF2AK1 overcomes the accumulation of RS and enables terminal erythroid maturation and red blood cell production**

**(A)** Flow cytometry plots showing the expression of CD71 and CD235a in representative NT (left) and *EIF2AK1* (right) sgRNA-treated *SF3B1*-mutant MDS-RS samples at day 13 of culture. **(B)** Representative Western blot analysis of EIF2AK1, phospho-EIF2S1 and LC3B in NT sgRNA- and *EIF2AK1* sgRNA-treated HD cells at day 13 of erythroid differentiation. Vinculin was used as a loading control. **(C)** Frequencies of CD71<sup>+</sup>CD235a<sup>-</sup> (left), CD71<sup>+</sup>CD235a<sup>+</sup> (middle), and CD71<sup>-</sup>CD235a<sup>+</sup> (right) erythroblasts in NT sgRNA- or *EIF2AK1* sgRNA-treated HD samples (n=3) at day 13 of culture. Each symbol represents one sample; lines connect paired samples. No significant differences were detected using paired t-tests. **(D)** UMAP showing the CytoTRACE values of the cells in Figure 4C. The color indicates the degree of differentiation from low (grey) to high (red). **(E)** Violin plots of CD71 (top) and CD235a (bottom) expression across the 11 clusters shown in Figure 4C. **(F)** Pathway enrichment analysis of the marker genes of cluster 1 (top) and 7 (bottom) shown in Figure 4C (adjusted  $P \leq 0.05$ ). **(G)** Dot plots of the expression of the genes involved in the EIF2AK1 response to heme deficiency pathway that were significantly downregulated in *EIF2AK1* sgRNA-treated cells from *SF3B1*-mutant MDS-RS in clusters 1 (left) and 7 (right) shown in Figure 4C. **(H)** Dot plots of the expression of the heme metabolism pathway genes that were significantly upregulated in *EIF2AK1* sgRNA-treated *SF3B1*-mutant MDS-RS cells from clusters 1 (left) and 7 (right) shown in Figure 4C. **(I)** Pathway enrichment analysis of the genes that were significantly upregulated (top) or downregulated (bottom) in *SF3B1*-mutant MDS-RS cells treated with *EIF2AK1* sgRNA as compared with those treated with NT sgRNAs ( $P \leq 0.05$ ). **(J)** Heatmap of genes involved in heme metabolism that were significantly upregulated in *SF3B1*-mutant MDS-RS cells after *EIF2AK1* depletion. Expression of *EIF2AK1*, *ATF4*, and *DDIT3* indicate *EIF2AK1* pathway inhibition. **(K)** Variant allelic frequencies (VAFs) of *SF3B1*<sup>MT</sup> detected in non-targeting (NT) sgRNA- and *EIF2AK1* sgRNA-treated MDS-RS cells at day 13 of culture.
