# Supplementary material for: Targeting the EIF2AK1 Signaling Pathway Rescues Red Blood Cell Production in SF3B1 -Mutant Myelodysplastic Syndromes With Ringed Sideroblasts
Source: Oxford University Press journal article supplement (doi:10.1158/2643-3230.bcd-21-0220), 2022-08-03
Supplement: bcd-21-0220_supplementary_tables_suppst1-st11.xlsx [file bcd-21-0220_supplementary_tables_suppst1-st11.xlsx]

## Sheet: Table S1
Table S1. Patients' information
Sample ID	scRNAseq baseline		scATACseq	scRNAseq baseline/treated		scRNAseq baseline/ EPO treated BM-MNCs	CRISPR/Cas9 NT/EIF2AK1	CRISPR/Cas9 NT/EIF2AK1 scRNAseq	Bulk RNA-seq	Targeted deep sequencing	Sample status	Diagnosis	Sex	Age	SF3B1 mutation	SF3B1 VAF %	% RS (BM)	% BM blasts	HB (g/dL)	WBC x109/L	PLT x109/L	ANC x109/L	RBC x1012/L	Transfusion Requirement yes/no	Karyotype	HMA treatment
	Lin-CD34+	BM-MNCs		Lin-CD34+	BM-MNCs
MDS-RS-1											Baseline	MDS-MLD-RS	M	72	E783K	44	50	1	8.1	6.8	354	4.09	2.36	yes	46,XY[20]
MDS-RS-2											HMA treatment	MDS-MLD-RS	M	73	E783K	35	25	2	10.9	6.6	284	3.64	3.01	no	46,XY[20]	Decitabine (cycle 11)
MDS-RS-3											Baseline	MDS-MLD-RS	F	79	K700E	40	14	2	11.4	4.8	222	2.91	3.34	no	46,XX[20]
MDS-RS-3-bis											Baseline	MDS-MLD-RS	F	79	K700E	40	14	2	11.4	4.8	222	2.91	3.34	no	46,XX[20]
MDS-RS-4											Baseline	MDS-MLD-RS	M	75	D781G	45	60	3	8.7	5.4	275	3.51	2.32	no	46,XY[20]
MDS-RS-5											Baseline	MDS-MLD-RS	M	79	K700E	44	23	2	9.6	5	211	3.54	2.62	no	45,XY,dic(9;18)(p13;p11.2),der(11)t(9;11)(p23;q22),del(20)(q11.2q13.3)[20]
MDS-RS-6											Baseline	MDS-MLD-RS	M	66	K700E	41	>50	2	8.8	5.6	186	3.34	2.46	no	46,XY,del(20)(q11.2q13.3)[16]/46,XY[4]
MDS-RS-7											HMA treatment	MDS-MLD-RS	M	67	K700E	NA	35	1	12.3	4.4	159	1.54	3.55	no	46,XY,del(20)(q11.2q13.3)[2]/46,XY[18]	5-Azacitidine (cycle 8)
MDS-RS-8											Baseline	MDS-SLD-RS	F	77	W658G	40	75	2	5.5	9.2	324	2.46	2.35	no	46,XX[20]
MDS-RS-9											Baseline	MDS-MLD-RS	F	82	K700E	43	70	3	9.9	4	267	1.43	2.81	no	47,XX,+mar[1]/46,XX[19]
MDS-RS-10											Baseline	MDS-MLD-RS	F	74	K700E	43	77	2.6	10.1	5.9	301	2.12	2.73	no	46,XX[20]
MDS-RS-11											Baseline	MDS-SLD-RS	F	63	K700E	NA	71	0	10.3	5.2	446	2.9	2.73	no	46,XX[20]
MDS-RS-12											Baseline	MDS-MLD-RS	M	78	K700E	43	70	1	10.2	3.8	157	1.93	2.71	no	45,X,-Y[6]/46,XY[14]
MDS-RS-13											Baseline	MDS-MLD-RS	M	88	K700E	44	70	1	7.8	7.8	259	5.38	2.14	no	46,XY,del(20)(q11.2q13.3)[16]/46,XY[4]
MDS-RS-14											Baseline	MDS-MLD-RS	M	75	K666R	41	56	1	10.2	7	246	5.32	2.94	no	46,XY[20]
MDS-RS-15											Baseline	MDS-MLD-RS	F	78	K700E	44	37	2	9.9	8.7	329	5.32	3.12	no	46,XX[20]
MDS-RS-16											Baseline	MDS-MLD-RS	M	50	K700E	48	70	2	10.4	6.1	394	3.71	2.96	no	46,XY[20]
MDS-RS-17											Baseline	MDS-MLD-RS	F	81	K700E	37	90	1	9.2	2.7	221	1.13	2.82	yes	46,XX[20]
MDS-RS-18											HMA treatment	MDS-MLD-RS	F	83	K700E	31	60	1	10.5	3.2	240	1.57	2.89	no	46,XX[20]	Decitabine (cycle 17)
MDS-RS-19											Baseline	MDS-MLD-RS	M	64	K700E	27	>50	1	7.5	4.2	234	1.75	1.77	yes	46,XY,add(11)(q23)[3]/46,XY[27]
MDS-RS-20											HMA treatment	MDS-MLD-RS	M	65	K700E	18	38	3	10.5	4	283	1.92	2.66	no	46,XY,add(11)(q23)[4]/46,XY[16]	Decitabine (cycle 7)
MDS-RS-21											Baseline	MDS-MLD-RS	M	79	K700E	46	24	0	8.3	5.5	230	3.34	NA	yes	46,XY[20]
MDS-RS-22											EPO treatment	MDS-MLD-RS	M	79	K700E	42	NA	1	9.2	5.6	120	3.27	NA	yes	NA
HD-1											Healthy donnor	Healthy donnor	M	59
HD-2											Healthy donnor	Healthy donnor	M	59
HD-3											Healthy donnor	Healthy donnor	F	62
HD-4											Healthy donnor	Healthy donnor	F	70
BM: bone marrow; MNCs: mononuclear cells; HMA: hypomethylating agents; VAF: variant allelic frequency; RS: ringed sideroblasts; HB: hemoglobin; WBC: white blood cells; PLT: platelets; ANC: absolute neutrophil counts; RBC: red blood cells

## Sheet: Table S2
Table S2. scRNA-seq cluster markers of Lin-CD34+ HSPCs from HD and and MDR-RS samples
p_val	avg_logFC	pct.1	pct.2	p_val_adj	cluster	gene
9.02373e-301	0.595772	1	0.947	1.80475e-297	0	ENO1
6.90929e-289	0.541003	1	0.977	1.38186e-285	0	GAPDH
2.68979e-277	0.664992	0.988	0.782	5.37957e-274	0	SMIM24
1.70588e-254	0.604021	0.983	0.78	3.41176e-251	0	MGST1
3.04663e-232	0.759077	0.947	0.642	6.09326e-229	0	C1QTNF4
1.82043e-224	0.546083	1	0.937	3.64085e-221	0	GSTP1
6.78027e-222	0.394483	1	0.993	1.35605e-218	0	RPLP1
6.69989e-221	0.706132	0.999	0.855	1.33998e-217	0	SPINK2
1.66091e-189	0.294242	0.965	0.749	3.32183e-186	0	PHGDH
3.45274e-187	0.467609	0.991	0.841	6.90548e-184	0	FABP5
5.0263e-168	0.578583	0.987	0.834	1.00526e-164	0	IGLL1
2.39358e-159	0.377896	0.887	0.655	4.78715e-156	0	AC002454.1
6.10119e-158	0.389763	0.99	0.913	1.22024e-154	0	CD69
9.8277e-151	0.488735	0.999	0.916	1.96554e-147	0	PRDX1
9.69017e-149	0.287738	0.927	0.706	1.93803e-145	0	RAB32
1.19749e-145	0.272136	0.984	0.875	2.39499e-142	0	SAP30
1.92777e-144	0.16018	0.844	0.642	3.85554e-141	0	CLDN10
4.43949e-143	0.272935	0.974	0.719	8.87899e-140	0	PSMB9
5.54228e-142	0.204796	0.881	0.634	1.10846e-138	0	LKAAEAR1
1.76294e-140	0.363902	0.98	0.79	3.52587e-137	0	PKM
2.73625e-140	0.290454	0.855	0.525	5.4725e-137	0	CEBPA
3.24397e-139	0.372403	1	0.99	6.48795e-136	0	RPL18A
6.79868e-139	0.426081	1	0.93	1.35974e-135	0	CALR
3.26739e-136	0.30941	0.926	0.727	6.53478e-133	0	CPA3
1.13716e-135	0.325265	0.922	0.705	2.27433e-132	0	TNFSF13B
1.6661e-135	0.293219	0.998	0.908	3.3322e-132	0	CYBA
6.01298e-134	0.343759	1	0.976	1.2026e-130	0	RPS16
1.31157e-133	0.303215	1	0.986	2.62315e-130	0	RPL14
3.41335e-133	0.103555	0.85	0.626	6.82669e-130	0	CDH2
1.74455e-124	0.374337	1	0.984	3.4891e-121	0	RPS12
6.96058e-123	0.25577	0.963	0.806	1.39212e-119	0	RFLNB
2.76155e-120	0.185088	0.823	0.597	5.5231e-117	0	SPARC
4.30351e-119	0.166221	0.956	0.812	8.60702e-116	0	PMAIP1
4.82023e-119	0.226735	0.954	0.73	9.64047e-116	0	IFITM3
6.71528e-118	0.168903	0.946	0.734	1.34306e-114	0	MZB1
1.03857e-116	0.265582	0.925	0.708	2.07715e-113	0	UNG
2.19863e-116	0.293624	0.987	0.867	4.39726e-113	0	PPA1
1.40592e-114	0.317206	1	0.937	2.81185e-111	0	LDHB
7.25169e-112	0.181069	0.82	0.52	1.45034e-108	0	CD48
1.20763e-107	0.230075	0.968	0.801	2.41525e-104	0	CSF3R
8.89316e-105	0.174267	0.853	0.565	1.77863e-101	0	PRAM1
1.93842e-99	0.176464	0.961	0.752	3.87685e-96	0	ITM2C
3.70887e-99	0.300815	0.994	0.879	7.41774e-96	0	SLC25A5
1.45131e-97	0.299744	0.98	0.812	2.90262e-94	0	MCM4
7.12657e-97	0.345135	1	0.989	1.42531e-93	0	RPS3A
1.70378e-96	0.286884	0.999	0.92	3.40757e-93	0	CHCHD2
2.50809e-96	0.12279	0.815	0.526	5.01619e-93	0	NAALADL1
4.36594e-95	0.276512	0.999	0.927	8.73188e-92	0	TXN
2.8559e-93	0.254897	0.997	0.954	5.7118e-90	0	HSPD1
1.31061e-92	0.318076	1	0.993	2.62121e-89	0	RPS18
1.85732e-92	0.316431	1	0.986	3.71465e-89	0	RPL13A
2.34246e-92	0.137807	0.869	0.624	4.68493e-89	0	SPNS3
4.05868e-92	0.12468	0.778	0.523	8.11736e-89	0	RAMP1
4.72383e-92	0.276857	1	0.961	9.44766e-89	0	RPS26
8.51495e-92	0.30916	0.995	0.913	1.70299e-88	0	GYPC
9.89262e-92	0.246724	0.97	0.782	1.97852e-88	0	CD52
6.09712e-91	0.141809	0.952	0.795	1.21942e-87	0	TOMM5
5.41297e-90	0.110887	0.921	0.717	1.08259e-86	0	ADA
1.61452e-89	0.241878	0.977	0.845	3.22904e-86	0	PYCARD
7.45903e-89	0.313547	1	0.991	1.49181e-85	0	RPL3
2.0526e-88	0.259237	0.967	0.801	4.1052e-85	0	MCM3
2.60584e-88	0.325011	0.998	0.927	5.21169e-85	0	DUT
5.34331e-88	0.288549	0.999	0.908	1.06866e-84	0	SELL
5.95778e-88	0.233404	0.98	0.848	1.19156e-84	0	NME1
7.07419e-87	0.175425	0.748	0.476	1.41484e-83	0	IGFBP2
1.20231e-86	0.172302	0.939	0.723	2.40461e-83	0	PPIH
7.64143e-85	0.169693	0.945	0.722	1.52829e-81	0	VAMP5
2.08846e-84	0.254171	0.995	0.9	4.17692e-81	0	ERH
9.73388e-84	0.249245	0.995	0.921	1.94678e-80	0	RAN
1.18298e-83	0.309918	1	0.985	2.36595e-80	0	RPS14
1.86231e-83	0.304297	0.995	0.911	3.72463e-80	0	SERPINB1
2.70827e-83	0.139864	0.783	0.549	5.41654e-80	0	C9orf139
6.15654e-83	0.240467	0.993	0.883	1.23131e-79	0	MIF
1.41283e-81	0.245176	0.997	0.887	2.82565e-78	0	PARK7
1.43886e-81	0.140238	0.906	0.734	2.87772e-78	0	HOPX
7.35603e-81	0.317646	1	0.984	1.47121e-77	0	RPS4X
7.46159e-81	0.321876	1	0.983	1.49232e-77	0	RPL7A
1.54334e-80	0.113695	0.713	0.464	3.08669e-77	0	C16orf74
2.14238e-80	0.31975	1	0.969	4.28475e-77	0	RPS13
2.174e-80	0.139777	0.94	0.799	4.34801e-77	0	FLT3
1.23067e-79	0.195281	0.977	0.825	2.46133e-76	0	ANAPC11
2.1033e-79	0.187726	0.959	0.777	4.2066e-76	0	CENPH
5.45558e-78	0.1731	0.953	0.785	1.09112e-74	0	RPA3
5.88651e-78	0.21931	0.992	0.868	1.1773e-74	0	PAICS
9.02833e-78	0.314161	0.941	0.795	1.80567e-74	0	CLEC11A
1.10894e-77	0.321209	1	0.984	2.21788e-74	0	RPS3
1.30862e-77	0.307572	1	0.993	2.61725e-74	0	RPS2
6.79892e-77	0.194339	1	0.965	1.35978e-73	0	HMGN2
2.72464e-76	0.194015	0.871	0.682	5.44929e-73	0	GINS2
3.01893e-76	0.148505	0.826	0.615	6.03787e-73	0	NUDT8
4.54774e-76	0.233072	0.994	0.911	9.09547e-73	0	SNRPD1
3.59171e-75	0.154116	0.995	0.95	7.18341e-72	0	AREG
5.85196e-75	0.109396	0.804	0.606	1.17039e-71	0	TRBC2
1.64826e-74	0.222332	0.995	0.905	3.29652e-71	0	ATP5MC3
1.75128e-74	0.318005	1	0.965	3.50257e-71	0	EEF1B2
6.13144e-74	0.228592	0.859	0.636	1.22629e-70	0	NPW
6.34896e-74	0.223598	1	0.997	1.26979e-70	0	EEF1A1
8.32232e-74	0.231668	0.991	0.917	1.66446e-70	0	LDHA
1.16422e-73	0.187868	0.945	0.77	2.32845e-70	0	DNPH1
8.26759e-73	0.242268	1	0.981	1.65352e-69	0	NPM1
4.05503e-72	0.121936	0.831	0.671	8.11006e-69	0	NRGN
4.30971e-72	0.130805	0.859	0.642	8.61942e-69	0	AGTRAP
6.35637e-72	0.186427	1	0.939	1.27127e-68	0	TUBA1B
1.68175e-70	0.166829	0.914	0.722	3.36351e-67	0	DCTPP1
3.67071e-70	0.113679	0.949	0.84	7.34141e-67	0	S100A11
5.01843e-70	0.181313	0.976	0.83	1.00369e-66	0	NDUFAB1
4.97929e-69	0.286419	1	0.983	9.95858e-66	0	RPL15
2.99424e-68	0.216671	0.993	0.893	5.98847e-65	0	C1QBP
5.24883e-68	0.214073	0.869	0.766	1.04977e-64	0	MDK
7.51942e-68	0.198374	0.963	0.818	1.50388e-64	0	SRM
7.24294e-67	0.223803	1	0.974	1.44859e-63	0	RPL23
1.08055e-66	0.316583	1	0.963	2.16109e-63	0	RPS5
1.69552e-66	0.274642	1	0.973	3.39103e-63	0	RPL21
3.12734e-66	0.106606	0.776	0.633	6.25467e-63	0	IL6R
7.70834e-66	0.139657	0.923	0.753	1.54167e-62	0	CHEK1
1.88554e-65	0.19428	1	0.972	3.77108e-62	0	RPL4
4.96904e-65	0.247319	0.999	0.926	9.93808e-62	0	H2AFZ
5.08726e-65	0.104922	0.986	0.89	1.01745e-61	0	PLAC8
1.15039e-64	0.205055	1	0.986	2.30078e-61	0	NCL
2.47188e-64	0.26602	1	0.979	4.94376e-61	0	RPSA
3.10354e-64	0.106255	0.879	0.716	6.20708e-61	0	ITGB2
3.13154e-64	0.102497	0.789	0.614	6.26307e-61	0	TSPOAP1
6.13066e-64	0.186587	0.971	0.787	1.22613e-60	0	PCNA
7.08057e-63	0.278043	1	0.981	1.41611e-59	0	RPS27A
9.38761e-63	0.210301	1	0.97	1.87752e-59	0	YBX1
1.31458e-62	0.185234	0.983	0.868	2.62915e-59	0	NHP2
1.86258e-62	0.267323	1	0.987	3.72517e-59	0	RPL41
2.85165e-62	0.189368	0.987	0.861	5.70331e-59	0	LSM4
6.13881e-62	0.168628	0.985	0.891	1.22776e-58	0	TPM4
2.15657e-61	0.116017	0.949	0.755	4.31314e-58	0	MRTO4
1.49932e-60	0.198745	0.995	0.9	2.99864e-57	0	RANBP1
1.78069e-60	0.192264	0.963	0.784	3.56138e-57	0	MCM7
2.91589e-60	0.14061	0.999	0.945	5.83179e-57	0	STMN1
3.26278e-60	0.190223	0.99	0.888	6.52556e-57	0	ATP5MC1
4.26005e-60	0.12605	0.93	0.745	8.52011e-57	0	PRDX4
2.81445e-59	0.195444	0.994	0.871	5.6289e-56	0	NDUFB2
6.12475e-59	0.192911	0.999	0.902	1.22495e-55	0	HSPE1
8.04284e-59	0.177886	0.979	0.859	1.60857e-55	0	VDAC1
3.54724e-58	0.200887	0.997	0.902	7.09447e-55	0	SNRPB
9.23792e-58	0.151266	0.924	0.776	1.84758e-54	0	MCM6
2.62436e-57	0.159332	0.96	0.784	5.24873e-54	0	MCM5
3.13651e-57	0.136325	0.839	0.646	6.27302e-54	0	TMEM106C
4.9745e-57	0.146572	0.954	0.808	9.949e-54	0	MRPS26
5.39031e-57	0.181435	0.962	0.799	1.07806e-53	0	TYMS
6.64761e-57	0.176264	0.994	0.894	1.32952e-53	0	HSPA8
6.78069e-57	0.186514	0.994	0.905	1.35614e-53	0	SNRPE
8.71362e-57	0.142806	0.96	0.805	1.74272e-53	0	EIF4EBP1
3.30694e-56	0.152123	0.95	0.791	6.61388e-53	0	HPRT1
7.80428e-56	0.117124	0.975	0.817	1.56086e-52	0	LMNB1
2.08977e-54	0.104875	0.765	0.634	4.17954e-51	0	RAC3
5.70666e-54	0.122326	0.922	0.757	1.14133e-50	0	POLD2
1.06411e-53	0.112976	0.952	0.777	2.12822e-50	0	MSH2
1.1474e-53	0.122294	0.88	0.716	2.29481e-50	0	RFC2
1.70448e-53	0.270698	1	0.971	3.40895e-50	0	RPL10A
2.97321e-53	0.181689	0.992	0.882	5.94641e-50	0	HMGA1
6.80116e-53	0.187577	0.998	0.937	1.36023e-49	0	PTGES3
8.61221e-53	0.10072	0.84	0.606	1.72244e-49	0	GGH
3.50634e-52	0.182928	0.995	0.913	7.01267e-49	0	RPL22L1
5.13169e-52	0.226145	1	0.985	1.02634e-48	0	RPL5
5.13389e-52	0.10415	0.865	0.671	1.02678e-48	0	RFC4
1.79268e-51	0.105004	0.843	0.665	3.58535e-48	0	DTL
1.94022e-51	0.161104	0.992	0.879	3.88044e-48	0	COX5A
1.76734e-50	0.178047	0.886	0.725	3.53468e-47	0	DHFR
2.24309e-50	0.21981	1	0.978	4.48618e-47	0	HSP90AB1
7.23743e-49	0.134563	0.983	0.85	1.44749e-45	0	NDUFAF8
1.89815e-48	0.101167	0.961	0.833	3.79629e-45	0	PSMD1
3.14125e-48	0.178008	0.998	0.909	6.2825e-45	0	SOD1
3.60629e-48	0.144429	1	0.987	7.21259e-45	0	HSP90AA1
3.12549e-47	0.152081	0.991	0.87	6.25098e-44	0	TPI1
7.99254e-47	0.115692	0.94	0.812	1.59851e-43	0	NDUFAF2
1.0374e-46	0.167871	0.963	0.863	2.07481e-43	0	USP1
2.50792e-46	0.132704	0.956	0.829	5.01583e-43	0	PRDX3
1.35912e-45	0.120239	0.982	0.864	2.71824e-42	0	SIVA1
1.60081e-45	0.177517	0.983	0.888	3.20162e-42	0	PDIA6
1.12934e-44	0.137186	0.977	0.848	2.25869e-41	0	IDH2
2.87485e-44	0.150081	0.998	0.925	5.7497e-41	0	PPIB
4.14949e-44	0.118309	0.869	0.667	8.29898e-41	0	CDT1
5.855e-44	0.142284	1	0.947	1.171e-40	0	CFL1
1.03749e-43	0.161909	0.997	0.936	2.07497e-40	0	PRKDC
1.17208e-43	0.114217	0.923	0.773	2.34415e-40	0	EBNA1BP2
1.72907e-43	0.101691	0.953	0.82	3.45815e-40	0	AK2
3.15822e-43	0.151918	0.972	0.869	6.31643e-40	0	FAM30A
4.73061e-43	0.163384	0.999	0.941	9.46122e-40	0	PFN1
5.65973e-43	0.248665	1	0.991	1.13195e-39	0	RPL10
5.78944e-43	0.116424	0.97	0.843	1.15789e-39	0	POLE3
1.38756e-41	0.137762	0.997	0.885	2.77513e-38	0	COX7B
3.69015e-41	0.158383	1	0.969	7.3803e-38	0	ACTG1
9.72159e-39	0.20111	1	0.98	1.94432e-35	0	RPL8
1.18486e-38	0.149463	0.992	0.906	2.36972e-35	0	PSMA7
2.8784e-38	0.11441	0.986	0.877	5.75679e-35	0	LSM3
4.23809e-38	0.114145	0.971	0.85	8.47618e-35	0	TIMM13
1.03818e-37	0.107437	0.927	0.763	2.07637e-34	0	GCSH
1.77461e-37	0.103135	0.955	0.808	3.54922e-34	0	RUVBL1
7.36001e-37	0.132392	0.977	0.863	1.472e-33	0	TUFM
1.05441e-36	0.100323	0.915	0.777	2.10883e-33	0	CMSS1
1.19502e-36	0.100253	0.962	0.815	2.39004e-33	0	UQCC2
2.87363e-35	0.110219	0.982	0.855	5.74726e-32	0	SNRPC
5.32882e-35	0.122365	0.969	0.846	1.06576e-31	0	ETFB
2.64874e-34	0.115778	0.956	0.823	5.29749e-31	0	MDH2
8.77238e-34	0.124942	0.992	0.906	1.75448e-30	0	ATP5F1B
1.60583e-33	0.139103	0.998	0.918	3.21166e-30	0	DYNLL1
1.90549e-33	0.130932	0.985	0.881	3.81098e-30	0	UQCRQ
3.38418e-33	0.125746	0.982	0.859	6.76837e-30	0	PRMT1
2.23767e-32	0.152035	1	0.962	4.47535e-29	0	PPIA
1.83962e-30	0.116122	0.968	0.86	3.67924e-27	0	HDGF
2.65943e-30	0.171067	0.995	0.939	5.31886e-27	0	HSPA5
2.714e-30	0.103036	0.98	0.866	5.42799e-27	0	NDUFS6
3.86178e-30	0.105491	0.976	0.848	7.72355e-27	0	GTF3C6
5.15229e-30	0.104625	0.982	0.859	1.03046e-26	0	POLR2L
1.1335e-29	0.126385	0.987	0.888	2.267e-26	0	CCT3
1.27845e-29	0.101341	0.988	0.907	2.5569e-26	0	DNAJA1
2.68832e-29	0.133496	1	0.953	5.37665e-26	0	SERBP1
6.75811e-29	0.132339	0.823	0.721	1.35162e-25	0	TK1
2.75972e-28	0.159885	0.998	0.96	5.51943e-25	0	HSP90B1
3.91913e-27	0.119095	0.995	0.887	7.83826e-24	0	ATP5MF
5.68421e-27	0.119577	1	0.933	1.13684e-23	0	NDUFS5
6.98226e-27	0.104175	0.998	0.923	1.39645e-23	0	PA2G4
8.11139e-27	0.131668	0.991	0.883	1.62228e-23	0	PSMA4
1.32663e-21	0.100125	0.992	0.87	2.65325e-18	0	NAA38
0	1.47896	0.995	0.803	0	1	AVP
0	1.341	0.998	0.95	0	1	AREG
0	1.27934	0.942	0.71	0	1	AC011139.1
0	1.26883	0.942	0.874	0	1	KLF2
0	1.22885	0.981	0.843	0	1	CRHBP
0	1.14623	0.972	0.882	0	1	CAVIN2
0	1.12521	0.996	0.916	0	1	TSC22D1
0	1.02159	1	0.94	0	1	NRIP1
0	0.967915	1	0.965	0	1	TSC22D3
0	0.945984	0.958	0.641	0	1	CLU
0	0.889471	0.958	0.843	0	1	GADD45A
0	0.873062	0.968	0.844	0	1	PCDH9
0	0.853195	0.958	0.728	0	1	HOPX
0	0.821462	1	0.983	0	1	FTH1
3.87514e-302	0.650032	1	0.967	7.75027e-299	1	FTL
4.81656e-300	0.673336	1	0.984	9.63312e-297	1	RPS4X
2.3756e-289	0.585918	0.898	0.742	4.75121e-286	1	HLF
8.01373e-288	0.771527	0.983	0.782	1.60275e-284	1	CD52
6.37475e-284	0.466187	0.88	0.787	1.27495e-280	1	TCEAL2
1.64141e-281	0.583186	1	0.984	3.28282e-278	1	RPS12
3.77292e-277	0.564217	1	0.993	7.54584e-274	1	RPS18
9.93683e-276	0.899862	0.999	0.93	1.98737e-272	1	SRGN
8.55588e-275	0.646248	0.946	0.85	1.71118e-271	1	SOCS2
6.74089e-269	0.660975	0.951	0.838	1.34818e-265	1	MMRN1
1.11467e-266	0.737781	0.996	0.933	2.22934e-263	1	HLA-DRA
2.01988e-266	0.66102	0.936	0.883	4.03975e-263	1	TNFAIP3
1.98598e-265	0.405004	1	0.997	3.97195e-262	1	EEF1A1
2.35401e-265	0.599345	1	0.989	4.70801e-262	1	RPS3A
2.18975e-264	0.541467	1	0.985	4.37951e-261	1	RPL5
1.48272e-263	0.655952	0.935	0.725	2.96545e-260	1	VAMP5
2.2969e-262	0.398551	0.84	0.661	4.59381e-259	1	SELENOM
3.2995e-259	0.528761	0.912	0.757	6.599e-256	1	PRKG2
2.31772e-245	0.588707	1	0.984	4.63544e-242	1	RPS3
3.61759e-240	0.4429	0.873	0.766	7.23519e-237	1	PREX2
5.41377e-240	0.748739	0.978	0.907	1.08275e-236	1	DUSP1
9.6646e-238	0.541082	1	0.981	1.93292e-234	1	RPS27A
2.41878e-235	0.582412	0.92	0.797	4.83756e-232	1	HEMGN
3.33812e-233	0.43107	0.904	0.855	6.67624e-230	1	NFIL3
5.94942e-232	0.562569	1	0.991	1.18988e-228	1	RPL10
1.42743e-227	0.494421	1	0.987	2.85486e-224	1	RPL41
1.54591e-221	0.490595	1	0.991	3.09182e-218	1	RPL3
3.26227e-219	0.50912	0.824	0.504	6.52454e-216	1	MEG3
1.02716e-216	0.49108	1	0.983	2.05431e-213	1	RPL15
2.84381e-213	0.573689	1	0.971	5.68761e-210	1	RPL10A
4.56284e-212	0.709318	0.999	0.958	9.12567e-209	1	VIM
2.07974e-206	0.516299	0.894	0.685	4.15947e-203	1	HLA-DQB1
6.92103e-197	0.498567	0.999	0.983	1.38421e-193	1	HIST1H1E
6.64399e-193	0.454083	1	0.986	1.3288e-189	1	RPS14
1.88018e-191	0.365087	0.863	0.792	3.76035e-188	1	SELENOP
5.62578e-191	0.525613	0.995	0.917	1.12516e-187	1	PRDX1
5.85605e-191	0.723034	0.968	0.921	1.17121e-187	1	JUN
2.17785e-187	0.156716	0.797	0.747	4.3557e-184	1	RASSF6
1.07045e-186	0.486251	1	0.969	2.1409e-183	1	RPS13
8.2244e-185	0.291151	0.794	0.691	1.64488e-181	1	LIMCH1
7.65351e-183	0.483077	0.954	0.843	1.5307e-179	1	ALDH1A1
3.66502e-182	0.474408	1	0.974	7.33003e-179	1	RPL21
4.31002e-182	0.480253	0.954	0.805	8.62003e-179	1	HLA-DRB1
9.54211e-181	0.144722	0.791	0.742	1.90842e-177	1	PCDH17
4.20728e-180	0.265259	0.8	0.765	8.41456e-177	1	CDH7
1.02632e-178	0.45191	0.915	0.787	2.05265e-175	1	GLIPR1
1.82027e-178	0.283971	0.804	0.712	3.64053e-175	1	CLEC9A
4.6516e-176	0.334608	0.86	0.783	9.3032e-173	1	JAML
1.16457e-175	0.406167	0.88	0.847	2.32914e-172	1	NR4A2
3.79163e-175	0.426544	1	0.986	7.58326e-172	1	RPL13A
2.39159e-174	0.533842	1	0.984	4.78319e-171	1	HIST1H1D
2.53354e-173	0.407329	0.904	0.89	5.06708e-170	1	SPRY1
4.23547e-168	0.399782	0.917	0.736	8.47094e-165	1	IFITM3
3.79585e-166	0.433477	1	0.98	7.59169e-163	1	RPL8
1.23435e-165	0.436255	0.903	0.777	2.4687e-162	1	ANGPT1
1.75144e-165	0.368871	0.846	0.753	3.50289e-162	1	MYCT1
2.43959e-165	0.398144	1	0.978	4.87918e-162	1	HSP90AB1
4.02259e-163	0.204471	0.792	0.823	8.04517e-160	1	CCL3L1
3.16232e-158	0.306801	0.797	0.693	6.32464e-155	1	AC026369.3
3.66218e-156	0.441743	1	0.983	7.32435e-153	1	RPL7A
3.72073e-156	0.428512	0.998	0.966	7.44147e-153	1	CD74
1.09273e-154	0.446011	0.942	0.762	2.18546e-151	1	LST1
5.82439e-152	0.367352	0.804	0.697	1.16488e-148	1	ADGRG6
5.33395e-150	0.69433	0.978	0.934	1.06679e-146	1	FOS
4.30204e-148	0.376981	0.882	0.75	8.60408e-145	1	HLA-DQA1
4.95191e-148	0.374151	1	0.961	9.90382e-145	1	RPS26
3.40914e-146	0.250532	0.846	0.759	6.81829e-143	1	ELL2
1.72092e-145	0.277529	0.779	0.529	3.44185e-142	1	CCDC42
1.94186e-144	0.519676	0.996	0.856	3.88372e-141	1	SPINK2
2.71118e-143	0.22166	0.768	0.751	5.42235e-140	1	CCL4L2
3.19778e-142	0.488165	0.996	0.968	6.39557e-139	1	HIST1H1C
7.4408e-141	0.425213	0.893	0.838	1.48816e-137	1	H1F0
1.74492e-140	0.368116	0.852	0.73	3.48984e-137	1	CAVIN1
5.94458e-139	0.218933	0.812	0.759	1.18892e-135	1	CXCL2
2.50942e-137	0.538141	0.93	0.877	5.01884e-134	1	FOSB
2.53304e-135	0.477943	0.999	0.963	5.06608e-132	1	RPS5
4.87076e-135	0.124144	0.766	0.551	9.74151e-132	1	SLC25A4
2.04978e-134	0.216978	0.743	0.559	4.09957e-131	1	GIMAP7
2.55353e-131	0.160733	0.777	0.535	5.10706e-128	1	RAB27B
2.91661e-131	0.439579	0.909	0.842	5.83321e-128	1	CITED2
1.03128e-130	0.406964	1	0.993	2.06256e-127	1	RPS2
1.82959e-130	0.280716	0.798	0.722	3.65918e-127	1	AJ009632.2
3.27928e-128	0.362905	0.887	0.905	6.55856e-125	1	ID2
1.89268e-127	0.378202	0.857	0.768	3.78536e-124	1	MDK
4.51979e-127	0.162288	0.729	0.613	9.03958e-124	1	AL359711.2
6.28646e-125	0.382047	0.975	0.869	1.25729e-121	1	FAM30A
9.10744e-125	0.14783	0.782	0.673	1.82149e-121	1	LINC00891
1.44461e-124	0.252552	0.78	0.606	2.88923e-121	1	SKAP1
5.82186e-124	0.195763	0.754	0.675	1.16437e-120	1	DNM3
7.38337e-123	0.227624	0.733	0.66	1.47667e-119	1	EMCN
1.04948e-121	0.115001	0.782	0.664	2.09895e-118	1	ZNF503
4.04036e-119	0.103211	0.726	0.634	8.08073e-116	1	PTGS2
2.04558e-118	0.359132	0.965	0.939	4.09116e-115	1	CXCR4
3.53274e-113	0.238741	0.812	0.742	7.06548e-110	1	AC020916.1
8.5453e-113	0.168038	0.776	0.709	1.70906e-109	1	CXCL3
8.41245e-110	0.222989	0.812	0.825	1.68249e-106	1	NR4A1
3.49072e-109	0.152776	0.77	0.766	6.98144e-106	1	EMP1
4.03279e-107	0.389822	1	0.966	8.06558e-104	1	EEF1B2
2.33077e-103	0.209751	0.707	0.675	4.66155e-100	1	SLC1A6
2.84783e-100	0.151393	0.767	0.66	5.69567e-97	1	ST6GAL2
1.42428e-93	0.270228	1	0.974	2.84855e-90	1	RPL23
5.11361e-89	0.150605	0.625	0.322	1.02272e-85	1	DLK1
1.10077e-87	0.197629	0.905	0.882	2.20155e-84	1	VPS37B
2.64612e-87	0.171031	0.812	0.799	5.29225e-84	1	SLC2A3
1.19859e-85	0.113592	0.743	0.603	2.39719e-82	1	AL121944.1
5.54199e-84	0.239853	0.761	0.64	1.1084e-80	1	KRT18
1.39434e-83	0.270289	0.885	0.86	2.78869e-80	1	PTMS
4.75035e-83	0.300892	0.974	0.937	9.50069e-80	1	ANXA1
4.53664e-82	0.226099	0.854	0.758	9.07328e-79	1	GSN
1.76887e-81	0.11025	0.696	0.647	3.53774e-78	1	EGLN3
4.54496e-80	0.315665	0.93	0.874	9.08993e-77	1	TUBA1A
3.57748e-78	0.133975	0.747	0.535	7.15495e-75	1	NAALADL1
1.20984e-77	0.123747	0.809	0.695	2.41968e-74	1	ITGA6
4.86452e-77	0.296751	0.976	0.911	9.72904e-74	1	SELL
5.13546e-77	0.238688	0.928	0.788	1.02709e-73	1	CYTL1
5.25825e-77	0.256349	0.929	0.855	1.05165e-73	1	LIMS1
3.98287e-76	0.31785	0.894	0.809	7.96575e-73	1	JUNB
1.41234e-68	0.29062	0.627	0.402	2.82469e-65	1	BEX1
1.91063e-68	0.197324	0.771	0.648	3.82126e-65	1	GCHFR
1.81253e-67	0.217233	0.699	0.59	3.62506e-64	1	PTGS1
1.30147e-66	0.163241	0.788	0.679	2.60293e-63	1	FAM19A2
1.89575e-64	0.220246	0.879	0.795	3.7915e-61	1	AKR1C3
5.49878e-64	0.221955	0.789	0.678	1.09976e-60	1	ANXA5
2.15394e-63	0.22138	0.691	0.672	4.30788e-60	1	CDKN1C
1.44309e-59	0.265029	1	0.99	2.88618e-56	1	RPL18A
2.06938e-57	0.160117	0.806	0.791	4.13876e-54	1	PBX1
2.61825e-57	0.173998	0.953	0.874	5.2365e-54	1	CST3
7.17449e-57	0.125694	0.724	0.631	1.4349e-53	1	GATA2-AS1
3.20501e-56	0.192864	0.771	0.725	6.41003e-53	1	GUCY1B1
4.78248e-55	0.10324	0.796	0.764	9.56496e-52	1	FOSL2
1.50047e-54	0.17642	0.813	0.806	3.00094e-51	1	PLXDC2
1.65465e-52	0.149206	0.777	0.748	3.3093e-49	1	CKB
1.81382e-52	0.244019	1	0.979	3.62764e-49	1	RPSA
3.58404e-52	0.207491	0.993	0.912	7.16808e-49	1	SERPINB1
2.03273e-51	0.158461	0.661	0.692	4.06546e-48	1	SELP
2.36984e-51	0.14775	0.758	0.633	4.73968e-48	1	HIST1H2BG
3.3816e-51	0.216097	0.972	0.898	6.7632e-48	1	TSPO
6.90408e-48	0.108507	0.693	0.533	1.38082e-44	1	MX1
6.96684e-47	0.138102	0.617	0.505	1.39337e-43	1	UCHL1
4.03075e-46	0.149567	0.673	0.769	8.0615e-43	1	PHLDB2
8.23658e-46	0.12118	0.725	0.574	1.64732e-42	1	IFI6
2.44287e-45	0.116888	0.807	0.765	4.88574e-42	1	ZFP36
3.97464e-45	0.100847	0.636	0.53	7.94929e-42	1	ID1
2.25634e-44	0.142486	0.968	0.938	4.51269e-41	1	HIST2H2AC
7.16513e-41	0.13808	0.818	0.746	1.43303e-37	1	FAM213A
7.55476e-41	0.133644	0.956	0.916	1.51095e-37	1	RAP1B
2.53199e-40	0.17813	0.992	0.938	5.06398e-37	1	GSTP1
1.26198e-38	0.109731	0.631	0.525	2.52396e-35	1	RGL4
4.56047e-36	0.125626	0.764	0.673	9.12094e-33	1	HSPA1A
9.59484e-36	0.146724	0.58	0.563	1.91897e-32	1	PDZK1IP1
2.56585e-33	0.150658	0.903	0.894	5.1317e-30	1	ATF7IP2
6.76065e-33	0.155253	0.86	0.869	1.35213e-29	1	DUSP6
1.0894e-29	0.194331	1	0.993	2.17879e-26	1	RPLP1
5.41243e-27	0.128947	0.888	0.828	1.08249e-23	1	CREG1
2.2384e-25	0.106138	0.91	0.872	4.47681e-22	1	CAST
6.18143e-15	0.107792	0.966	0.913	1.23629e-11	1	SOD1
4.75844e-60	0.628013	0.806	0.82	9.51688e-57	2	CSF3R
7.01749e-52	0.611788	0.9	0.883	1.4035e-48	2	VPS37B
4.456e-51	0.365846	0.793	0.754	8.912e-48	2	HLF
1.30359e-48	0.151708	0.764	0.76	2.60718e-45	2	NR4A3
3.30438e-48	0.464206	0.748	0.781	6.60877e-45	2	PREX2
1.45246e-44	0.425545	0.883	0.889	2.90493e-41	2	TNFAIP3
1.84763e-44	0.524039	0.872	0.912	3.69525e-41	2	AHNAK
2.31803e-41	0.37081	0.79	0.766	4.63607e-38	2	ELL2
2.51233e-35	0.461127	0.731	0.73	5.02465e-32	2	AJ009632.2
8.07973e-34	0.751073	0.853	0.857	1.61595e-30	2	PCDH9
6.69308e-31	0.293617	0.747	0.767	1.33862e-27	2	CXCL2
1.25363e-26	0.331994	0.822	0.854	2.50726e-23	2	NR4A2
9.64502e-26	0.678866	0.745	0.782	1.929e-22	2	KCNQ1OT1
8.79107e-25	0.107787	0.674	0.904	1.75821e-21	2	TUBA1A
5.94067e-24	0.562726	0.607	0.529	1.18813e-20	2	MEG3
1.49657e-23	0.324495	0.829	0.861	2.99314e-20	2	CRHBP
4.00053e-23	0.124489	0.604	0.831	8.00106e-20	2	PLXDC2
3.84867e-22	0.167929	0.691	0.692	7.69734e-19	2	TNFAIP2
4.43287e-22	0.120025	0.685	0.704	8.86574e-19	2	LIMCH1
1.38984e-21	0.295529	0.951	0.983	2.77968e-18	2	SFPQ
3.64183e-20	0.29518	0.955	0.955	7.28366e-17	2	AREG
3.64903e-17	0.409015	0.783	0.791	7.29806e-14	2	ANGPT1
3.69962e-14	0.268559	0.961	0.97	7.39925e-11	2	TSC22D3
6.38862e-14	0.130514	0.719	0.744	1.27772e-10	2	NAV1
2.1367e-13	0.126819	0.844	0.885	4.27339e-10	2	KLF2
2.76835e-12	0.131509	0.7	0.708	5.5367e-09	2	TTN
1.72989e-11	0.123966	0.519	0.684	3.45978e-08	2	EGR1
2.51628e-11	0.222095	0.666	0.664	5.03255e-08	2	HGF
6.18764e-11	0.237169	0.72	0.753	1.23753e-07	2	AC020916.1
1.10079e-10	0.359443	0.916	0.95	2.20157e-07	2	NRIP1
1.4355e-10	0.1098	0.714	0.772	2.87099e-07	2	EMP1
2.833e-10	0.247611	0.767	0.829	5.66601e-07	2	AVP
7.75364e-09	0.10093	0.655	0.669	1.55073e-05	2	EMCN
5.34028e-08	0.246084	0.727	0.772	0.000106806	2	FOSL2
5.46544e-08	0.554283	0.819	0.89	0.000109309	2	FOSB
1.67628e-07	0.223655	0.613	0.777	0.000335256	2	TENT5A
4.16361e-07	0.125383	0.692	0.88	0.000832722	2	BTG2
5.07484e-07	0.119248	0.66	0.667	0.00101497	2	SDK2
8.50673e-07	0.117574	0.759	0.933	0.00170135	2	DUSP1
1.18685e-06	0.148147	0.766	0.805	0.00237369	2	SLC2A3
1.68334e-06	0.117811	0.754	0.795	0.00336668	2	JAML
1.02008e-05	0.129181	0.806	0.933	0.0204015	2	RIF1
1.06912e-05	0.230664	0.752	0.832	0.0213824	2	NR4A1
1.0923e-05	0.153052	0.588	0.603	0.0218461	2	AC092279.1
1.13284e-05	0.155985	0.454	0.594	0.0226569	2	IKZF2
1.7527e-05	0.219706	0.732	0.857	0.035054	2	H1F0
1.94402e-05	0.270719	0.564	0.729	0.0388804	2	ZNF385D
0.000109459	0.10292	0.65	0.818	0.218918	2	GLIPR1
0.000177297	0.129481	0.552	0.741	0.354594	2	AL359220.1
0.000229141	0.181532	0.61	0.758	0.458281	2	LYST
0.000369492	0.152681	0.52	0.646	0.738983	2	TSPOAP1
0.000527401	0.158615	0.7	0.803	1	2	PBX1
0.00080565	0.140682	0.695	0.783	1	2	PRKG2
0.0009362	0.221806	0.726	0.812	1	2	STXBP5
0.00245213	0.209323	0.671	0.694	1	2	POU2F2
0.00293348	0.437662	0.849	0.935	1	2	JUN
0.00370943	0.236302	0.602	0.751	1	2	FNDC3B
0.00434272	0.127983	0.683	0.772	1	2	SLC26A2
3.68218e-176	0.694874	1	0.86	7.36437e-173	3	SPINK2
3.42451e-165	0.574315	0.994	0.786	6.84902e-162	3	CD52
7.0074e-157	0.535507	0.949	0.735	1.40148e-153	3	HOPX
4.98225e-150	0.520684	0.986	0.789	9.96451e-147	3	SMIM24
5.09296e-148	0.334476	0.975	0.847	1.01859e-144	3	CRHBP
1.01709e-140	0.534516	0.988	0.916	2.03417e-137	3	CD69
2.16861e-139	0.467377	0.977	0.809	4.33722e-136	3	AVP
2.23418e-135	0.585931	0.991	0.871	4.46836e-132	3	FAM30A
7.70986e-124	0.533598	0.997	0.919	1.54197e-120	3	PRDX1
1.85542e-121	0.420564	1	0.984	3.71084e-118	3	RPL15
9.27068e-120	0.43575	1	0.942	1.85414e-116	3	NRIP1
1.87993e-119	0.45445	1	0.985	3.75986e-116	3	RPS4X
1.7495e-118	0.470472	1	0.972	3.499e-115	3	RPL10A
2.18073e-117	0.41759	1	0.991	4.36147e-114	3	RPL3
4.94922e-117	0.426902	1	0.97	9.89843e-114	3	RPS13
4.81698e-115	0.431419	1	0.99	9.63395e-112	3	RPS3A
1.59052e-112	0.38416	1	0.986	3.18103e-109	3	RPL13A
2.14525e-112	0.436459	1	0.992	4.29049e-109	3	RPL10
2.90979e-111	0.161116	0.85	0.69	5.81958e-108	3	AC026369.3
2.23438e-110	0.406148	1	0.982	4.46875e-107	3	RPS27A
9.53233e-110	0.401218	1	0.985	1.90647e-106	3	RPS12
2.14203e-109	0.263551	0.968	0.878	4.28407e-106	3	DDIT4
2.62373e-106	0.382018	1	0.985	5.24745e-103	3	RPL5
3.33328e-106	0.387165	1	0.986	6.66655e-103	3	RPS14
9.90051e-106	0.310574	0.951	0.776	1.9801e-102	3	ANGPT1
6.76736e-105	0.373506	1	0.99	1.35347e-101	3	RPL18A
3.154e-104	0.254832	0.947	0.797	6.308e-101	3	HEMGN
1.2564e-100	0.351416	0.998	0.951	2.5128e-97	3	AREG
1.32352e-99	0.40941	1	0.984	2.64704e-96	3	RPS3
1.09542e-97	0.419056	0.995	0.911	2.19085e-94	3	SELL
1.14732e-95	0.201718	0.963	0.84	2.29465e-92	3	MMRN1
2.8428e-95	0.39273	1	0.993	5.6856e-92	3	RPS2
3.74542e-95	0.321157	1	0.994	7.49083e-92	3	RPLP1
1.16289e-94	0.124333	0.947	0.849	2.32578e-91	3	PCDH9
9.23848e-93	0.114665	0.799	0.513	1.8477e-89	3	TSPAN2
5.82032e-92	0.358381	1	0.993	1.16406e-88	3	RPS18
2.24613e-91	0.349884	1	0.97	4.49227e-88	3	ACTG1
8.16577e-90	0.282333	0.927	0.781	1.63315e-86	3	HIST3H2A
4.56597e-88	0.273535	0.918	0.743	9.13194e-85	3	MZB1
1.11471e-85	0.402912	1	0.964	2.22941e-82	3	RPS5
1.57546e-85	0.409713	0.995	0.914	3.15093e-82	3	SERPINB1
2.01827e-82	0.257156	0.992	0.918	4.03653e-79	3	TSC22D1
4.07314e-82	0.141963	0.878	0.692	8.14627e-79	3	ITGA6
2.59582e-81	0.113154	0.937	0.853	5.19165e-78	3	NFIL3
2.26143e-80	0.203332	0.971	0.885	4.52286e-77	3	CAVIN2
1.39279e-78	0.30228	0.969	0.764	2.78558e-75	3	LST1
3.22647e-78	0.265959	0.995	0.967	6.45295e-75	3	TSC22D3
1.34447e-77	0.25814	1	0.997	2.68895e-74	3	EEF1A1
3.44045e-75	0.246729	0.887	0.768	6.88091e-72	3	MDK
1.51041e-72	0.320289	1	0.987	3.02083e-69	3	RPL41
2.42825e-72	0.195474	0.842	0.636	4.85649e-69	3	KRT18
4.56366e-71	0.29857	1	0.982	9.12732e-68	3	NPM1
3.85698e-69	0.215301	0.927	0.731	7.71395e-66	3	VAMP5
3.20117e-68	0.319662	0.887	0.657	6.40233e-65	3	C1QTNF4
1.75749e-67	0.332121	1	0.983	3.51499e-64	3	RPL7A
2.84602e-67	0.289029	0.997	0.935	5.69205e-64	3	HLA-DRA
1.55154e-66	0.292261	0.998	0.949	3.10308e-63	3	ENO1
1.93863e-66	0.227486	0.91	0.791	3.87726e-63	3	GLIPR1
2.31354e-66	0.151088	0.949	0.846	4.62708e-63	3	GADD45A
3.59575e-66	0.132072	0.941	0.899	7.1915e-63	3	ID2
3.86349e-66	0.198061	0.788	0.614	7.72698e-63	3	TRBC2
6.82768e-65	0.289088	1	0.962	1.36554e-61	3	RPS26
4.95134e-63	0.176723	0.957	0.854	9.90267e-60	3	PTMS
6.99914e-63	0.147034	0.944	0.887	1.39983e-59	3	SPRY1
2.10541e-62	0.157842	0.952	0.883	4.21082e-59	3	TNFAIP3
6.12973e-62	0.291532	1	0.979	1.22595e-58	3	RPSA
1.94844e-61	0.200856	0.918	0.74	3.89688e-58	3	IFITM3
1.29749e-60	0.125093	0.903	0.798	2.59498e-57	3	IGHM
7.61938e-60	0.297999	1	0.974	1.52388e-56	3	RPL21
1.55738e-55	0.309908	0.998	0.967	3.11476e-52	3	EEF1B2
1.85582e-52	0.204222	0.958	0.85	3.71164e-49	3	PYCARD
3.51509e-52	0.263967	1	0.978	7.03018e-49	3	HSP90AB1
6.22004e-49	0.100614	0.815	0.702	1.24401e-45	3	ARID5B
9.78738e-49	0.11537	0.954	0.807	1.95748e-45	3	CSF3R
1.28756e-48	0.256105	1	0.985	2.57512e-45	3	HIST1H1D
3.5462e-46	0.111464	0.892	0.752	7.09239e-43	3	HLA-DQA1
5.19897e-44	0.123567	0.912	0.805	1.03979e-40	3	FLT3
1.57833e-43	0.106917	0.785	0.532	3.15666e-40	3	CD48
2.72283e-42	0.106852	0.932	0.774	5.44567e-39	3	GAPT
4.2953e-42	0.179313	0.952	0.79	8.5906e-39	3	CYTL1
8.99092e-41	0.236313	1	0.981	1.79818e-37	3	RPL8
6.45664e-38	0.125763	0.705	0.537	1.29133e-34	3	RAMP1
1.75224e-37	0.12197	0.918	0.837	3.50448e-34	3	H1F0
2.47427e-37	0.198754	1	0.983	4.94855e-34	3	HIST1H1E
4.00025e-37	0.117941	0.975	0.888	8.0005e-34	3	ATF7IP2
6.48746e-36	0.179174	0.988	0.895	1.29749e-32	3	APRT
1.93665e-33	0.193277	1	0.987	3.87331e-30	3	RPL14
4.71136e-33	0.13315	0.98	0.894	9.42272e-30	3	TPM4
1.08326e-32	0.147266	0.833	0.735	2.16653e-29	3	CAVIN1
3.41717e-32	0.182929	0.998	0.939	6.83433e-29	3	LDHB
3.47234e-32	0.206937	1	0.977	6.94468e-29	3	RPS16
2.60121e-31	0.181093	0.998	0.939	5.20242e-28	3	GSTP1
5.69574e-29	0.11463	0.951	0.809	1.13915e-25	3	HLA-DRB1
5.04395e-28	0.154152	0.98	0.872	1.00879e-24	3	PPA1
8.2561e-27	0.171888	1	0.967	1.65122e-23	3	FTL
7.26062e-23	0.107454	0.958	0.854	1.45212e-19	3	LIMS1
2.18602e-19	0.122871	0.828	0.774	4.37204e-16	3	KCNQ1OT1
3.66022e-19	0.152526	0.998	0.975	7.32044e-16	3	RPL23
4.28826e-13	0.129823	0.631	0.574	8.57653e-10	3	RHEX
0	1.50099	1	0.715	0	4	BLVRB
0	1.489	0.998	0.567	0	4	AHSP
0	1.38136	1	0.893	0	4	S100A6
0	1.25871	1	0.906	0	4	PRDX2
0	0.999946	1	0.781	0	4	REXO2
0	0.203518	0.984	0.612	0	4	SLC10A4
5.92445e-299	0.814139	1	0.516	1.18489e-295	4	KLF1
7.40689e-299	1.29543	1	0.564	1.48138e-295	4	APOC1
1.86319e-297	0.951109	1	0.919	3.72638e-294	4	ATP5IF1
4.98773e-294	0.71368	1	0.971	9.97546e-291	4	YBX1
2.42891e-292	0.829991	0.992	0.626	4.85782e-289	4	APOE
6.73399e-289	0.156793	0.968	0.445	1.3468e-285	4	SLC25A21
7.3771e-287	1.07723	0.969	0.606	1.47542e-283	4	FAM178B
7.80359e-287	0.260548	0.974	0.467	1.56072e-283	4	UCA1
1.42714e-285	0.744036	1	0.829	2.85428e-282	4	NME4
2.03837e-285	0.807111	1	0.849	4.07674e-282	4	TMEM14C
1.42697e-283	1.59255	0.968	0.507	2.85395e-280	4	HBB
2.14645e-281	0.732023	1	0.767	4.29291e-278	4	UROD
9.77663e-281	0.129642	0.939	0.434	1.95533e-277	4	DES
1.54693e-275	0.686774	0.994	0.56	3.09385e-272	4	ANK1
1.92741e-274	1.35604	0.958	0.468	3.85481e-271	4	CA1
6.72025e-273	0.7522	0.998	0.862	1.34405e-269	4	MPC2
1.30286e-270	0.604935	0.982	0.648	2.60572e-267	4	FAM89A
3.99724e-268	0.287131	0.947	0.575	7.99449e-265	4	MYL4
7.18507e-266	0.615945	0.958	0.566	1.43701e-262	4	EPCAM
2.46356e-265	0.656638	1	0.908	4.92712e-262	4	CCT6A
1.27505e-262	0.699485	1	0.839	2.55009e-259	4	GLRX5
1.63248e-262	0.649766	1	0.695	3.26496e-259	4	CD36
1.76152e-262	0.697316	1	0.938	3.52305e-259	4	HNRNPAB
1.86052e-261	0.629838	1	0.908	3.72103e-258	4	EIF5A
2.1389e-261	0.637612	0.964	0.491	4.27779e-258	4	KCNH2
3.07013e-258	0.605307	1	0.955	6.14027e-255	4	HSPD1
3.91267e-257	0.599987	0.998	0.824	7.82534e-254	4	NOP10
6.81975e-256	0.650701	0.997	0.875	1.36395e-252	4	TMEM14B
3.5872e-255	0.506956	0.987	0.527	7.17439e-252	4	PPP1R14A
6.27404e-255	0.591427	0.977	0.485	1.25481e-251	4	GATA1
3.58293e-254	0.623419	1	0.891	7.16587e-251	4	ATP5MC1
9.86731e-250	0.360643	0.927	0.44	1.97346e-246	4	PKLR
1.26981e-249	0.581638	0.982	0.612	2.53962e-246	4	PVT1
1.47662e-248	0.642604	0.998	0.817	2.95324e-245	4	PLIN2
7.53844e-247	0.629048	1	0.825	1.50769e-243	4	NFIA
1.46483e-246	0.610299	1	0.925	2.92966e-243	4	PA2G4
8.63208e-246	0.575434	0.994	0.556	1.72642e-242	4	TFR2
4.6375e-245	0.517745	0.994	0.733	9.275e-242	4	SMIM10
8.48568e-244	0.519547	0.977	0.629	1.69714e-240	4	SMIM1
5.14682e-241	0.549799	0.984	0.78	1.02936e-237	4	UBAC1
1.4414e-239	0.59713	1	0.896	2.8828e-236	4	C1QBP
3.69398e-237	0.10405	0.911	0.487	7.38795e-234	4	G0S2
9.69633e-236	0.809241	0.994	0.827	1.93927e-232	4	SYNGR1
4.46267e-235	0.549452	0.998	0.843	8.92535e-232	4	MRPS34
4.81241e-234	0.46121	0.966	0.596	9.62482e-231	4	TST
4.48738e-232	0.102464	0.916	0.372	8.97477e-229	4	AC073349.1
1.66785e-231	0.533965	1	0.852	3.33571e-228	4	TIMM13
1.28608e-230	0.245706	0.969	0.731	2.57216e-227	4	FAM129B
1.12206e-229	0.139412	0.885	0.285	2.24411e-226	4	UBXN10
5.3165e-226	0.853116	1	0.922	1.0633e-222	4	S100A4
1.24621e-225	0.480706	0.977	0.529	2.49241e-222	4	CNRIP1
2.50746e-225	0.615947	0.997	0.758	5.01492e-222	4	CASP3
9.4281e-225	0.575743	1	0.905	1.88562e-221	4	HSPE1
2.88529e-224	0.445201	0.989	0.664	5.77057e-221	4	MINPP1
5.24968e-223	0.553629	1	0.886	1.04994e-219	4	HMGA1
7.9081e-223	0.531558	0.998	0.861	1.58162e-219	4	PRELID1
1.02747e-220	0.456648	0.987	0.729	2.05493e-217	4	ISOC2
1.54425e-220	0.51943	0.997	0.847	3.0885e-217	4	HBS1L
2.88253e-220	0.512125	0.922	0.552	5.76507e-217	4	HES6
5.00653e-220	0.243561	0.914	0.609	1.00131e-216	4	TUBB2A
9.51356e-218	0.358861	0.911	0.479	1.90271e-214	4	HBQ1
3.96621e-217	0.447312	0.989	0.741	7.93242e-214	4	BOLA3
5.40342e-217	0.497159	1	0.872	1.08068e-213	4	GADD45GIP1
1.21801e-216	0.503441	0.989	0.803	2.43602e-213	4	LMNA
2.16226e-216	0.483502	0.982	0.743	4.32453e-213	4	TMEM141
6.8399e-216	0.745108	0.992	0.688	1.36798e-212	4	MYC
2.65951e-214	0.494366	1	0.954	5.31902e-211	4	SERBP1
5.61209e-214	0.333028	0.984	0.704	1.12242e-210	4	CSF1
5.31419e-213	0.13623	0.913	0.386	1.06284e-209	4	KEL
1.32353e-210	0.486594	0.995	0.851	2.64706e-207	4	NME1
6.72478e-210	0.281797	0.982	0.769	1.34496e-206	4	MTSS1
1.07067e-209	0.696543	1	0.804	2.14135e-206	4	PCLAF
1.63983e-209	0.486972	0.998	0.792	3.27966e-206	4	PAFAH1B3
1.02114e-208	0.557224	0.995	0.865	2.04228e-205	4	CAST
9.43021e-208	0.546805	0.995	0.816	1.88604e-204	4	PRKAR2B
3.60034e-206	0.492517	1	0.862	7.20068e-203	4	POLR2L
3.90539e-205	0.521894	1	0.987	7.81078e-202	4	HSP90AA1
3.46659e-204	0.47354	0.989	0.724	6.93317e-201	4	LYAR
1.36674e-203	0.428914	0.987	0.795	2.73348e-200	4	CDC42BPA
2.11748e-202	0.530097	1	0.923	4.23497e-199	4	RAN
5.66531e-202	0.369908	0.969	0.693	1.13306e-198	4	ELOVL6
2.92313e-201	0.286921	0.994	0.748	5.84626e-198	4	NEDD4L
5.26666e-201	0.286531	0.929	0.55	1.05333e-197	4	EPOR
1.9072e-200	0.381417	0.953	0.632	3.81439e-197	4	HMBS
2.01413e-200	0.525483	1	0.886	4.02826e-197	4	MIF
1.25329e-199	0.551292	0.998	0.841	2.50658e-196	4	CENPU
1.7492e-199	0.512737	1	0.923	3.4984e-196	4	CHCHD2
2.19203e-199	0.48877	1	0.907	4.38405e-196	4	ATP5MC3
3.12442e-198	0.443175	1	0.865	6.24883e-195	4	NUDC
8.56345e-198	0.422887	0.994	0.767	1.71269e-194	4	CENPX
2.29246e-197	0.391705	0.984	0.725	4.58491e-194	4	BLVRA
3.75278e-197	0.412349	0.995	0.782	7.50556e-194	4	GAR1
4.38636e-196	0.480202	0.987	0.771	8.77273e-193	4	FCGRT
5.43916e-195	0.335097	0.981	0.738	1.08783e-191	4	CENPV
3.8425e-194	0.410071	0.989	0.734	7.685e-191	4	PSMB5
1.52973e-193	0.515193	1	0.903	3.05946e-190	4	RANBP1
3.85401e-193	0.35003	0.939	0.58	7.70803e-190	4	FHL2
7.16594e-193	0.170611	0.927	0.476	1.43319e-189	4	SPTBN2
6.91144e-192	0.443065	0.995	0.794	1.38229e-188	4	MIR4435-2HG
1.64159e-191	0.441955	1	0.882	3.28318e-188	4	COX5A
2.05061e-191	0.569152	1	0.916	4.10123e-188	4	GYPC
2.30905e-191	0.850055	0.998	0.901	4.61809e-188	4	HIST1H1B
1.32689e-190	0.566723	1	0.877	2.65378e-187	4	EMP3
2.57425e-190	0.392743	0.961	0.691	5.1485e-187	4	MBOAT2
2.86532e-190	0.426715	1	0.841	5.73063e-187	4	PHB
4.90777e-190	0.414385	0.994	0.8	9.81554e-187	4	TPGS2
8.0438e-190	0.239728	0.956	0.589	1.60876e-186	4	TRIB2
1.10784e-188	0.456926	1	0.905	2.21568e-185	4	SNRPB
2.21662e-188	0.336243	0.905	0.584	4.43325e-185	4	SPTA1
3.84981e-188	0.177725	0.973	0.646	7.69963e-185	4	GDPD1
4.5237e-188	0.384492	0.977	0.702	9.04741e-185	4	TIMM10
2.07187e-187	0.449409	0.992	0.791	4.14374e-184	4	HMGN5
2.69764e-187	0.478396	0.995	0.825	5.39528e-184	4	MAP2K2
2.78991e-186	0.370666	0.994	0.783	5.57981e-183	4	MRPL14
3.45393e-186	0.446077	0.998	0.868	6.90785e-183	4	GSPT1
1.54618e-185	0.45884	1	0.913	3.09236e-182	4	SNRPD1
8.50517e-185	0.472739	1	0.936	1.70103e-181	4	NDUFS5
1.11217e-184	0.195233	0.916	0.52	2.22435e-181	4	MFSD2B
1.74913e-184	0.346378	0.984	0.728	3.49826e-181	4	ZFPM1
5.96511e-184	0.419271	0.992	0.816	1.19302e-180	4	PSMD12
1.2632e-182	0.458925	1	0.82	2.5264e-179	4	TPM1
3.2907e-182	0.302634	0.879	0.48	6.5814e-179	4	CDH1
3.97169e-181	0.395819	1	0.853	7.94339e-178	4	NDUFAF8
5.19284e-180	0.337489	0.961	0.689	1.03857e-176	4	FAM210B
7.54591e-180	0.424871	0.998	0.817	1.50918e-176	4	UQCC2
1.03753e-179	0.155257	0.906	0.522	2.07507e-176	4	FAM83D
1.53167e-178	0.379962	0.981	0.691	3.06334e-175	4	GMNN
2.46975e-178	0.556402	1	0.897	4.93949e-175	4	HSPA8
8.59158e-178	0.542541	1	0.801	1.71832e-174	4	TYMS
4.21325e-176	0.174138	0.977	0.735	8.42651e-173	4	HIST1H3F
1.615e-175	0.4598	0.969	0.564	3.23e-172	4	ITGA2B
3.29845e-175	0.594258	1	0.929	6.59689e-172	4	DUT
5.52764e-175	0.377937	0.994	0.792	1.10553e-171	4	POLR2F
7.52499e-175	0.444373	0.973	0.731	1.505e-171	4	HEBP1
8.11349e-175	0.106023	0.863	0.562	1.6227e-171	4	CTTN
1.54678e-174	0.382655	0.998	0.818	3.09355e-171	4	MRPL52
1.54956e-174	0.363813	0.973	0.755	3.09911e-171	4	MYH10
2.50881e-174	0.376917	0.973	0.702	5.01761e-171	4	LXN
7.69848e-174	0.39687	0.994	0.772	1.5397e-170	4	DNPH1
1.33712e-173	0.435953	0.994	0.849	2.67424e-170	4	DNAJC9
1.99989e-173	0.366704	0.989	0.732	3.99979e-170	4	MRPL12
1.15393e-172	0.445212	1	0.909	2.30786e-169	4	PSMA7
1.21972e-172	0.533273	1	0.915	2.43944e-169	4	RPL22L1
3.03956e-172	0.252	0.887	0.488	6.07912e-169	4	RFESD
1.81115e-171	0.30665	0.859	0.367	3.6223e-168	4	ADD2
3.11717e-171	0.407537	1	0.901	6.23433e-168	4	PPP1R14B
4.36949e-171	0.401162	0.99	0.802	8.73897e-168	4	RNH1
1.74574e-170	0.42058	1	0.912	3.49147e-167	4	SOD1
7.92637e-170	0.272548	0.913	0.643	1.58527e-166	4	NECAB1
3.72494e-169	0.347056	0.994	0.75	7.44987e-166	4	UROS
6.68296e-169	0.304175	0.937	0.568	1.33659e-165	4	CD320
7.82646e-169	0.373107	0.998	0.842	1.56529e-165	4	FBXO7
1.16107e-168	0.229941	0.945	0.64	2.32214e-165	4	NECTIN1
2.60369e-168	0.406465	0.992	0.797	5.20739e-165	4	SLBP
3.70054e-168	0.378339	0.995	0.748	7.40109e-165	4	FKBP4
1.01708e-167	0.448073	0.998	0.736	2.03415e-164	4	CYTOR
1.72487e-167	0.27408	0.968	0.698	3.44973e-164	4	STRADB
3.00234e-167	0.458713	1	0.981	6.00467e-164	4	RPL8
3.315e-167	0.380491	0.994	0.801	6.63001e-164	4	TOMM40
3.57017e-167	0.385859	1	0.987	7.14034e-164	4	RPL14
4.99215e-167	0.316943	0.948	0.58	9.9843e-164	4	TESC
5.24419e-167	0.410301	1	0.823	1.04884e-163	4	SLC39A3
8.63658e-167	0.370939	0.984	0.753	1.72732e-163	4	CMBL
1.49846e-166	0.418505	0.995	0.792	2.99692e-163	4	CDK4
3.04173e-166	0.312426	0.977	0.657	6.08347e-163	4	FSCN1
4.13995e-166	0.268771	0.918	0.696	8.2799e-163	4	CA2
5.36437e-166	0.381228	0.989	0.789	1.07287e-162	4	ALYREF
8.48126e-166	0.421781	1	0.882	1.69625e-162	4	SNRPG
1.14362e-165	0.382237	0.989	0.764	2.28725e-162	4	GCSH
1.18002e-165	0.43193	1	0.921	2.36003e-162	4	DYNLL1
1.87204e-165	0.222675	0.871	0.593	3.74408e-162	4	CCDC26
6.92879e-165	0.364264	0.985	0.78	1.38576e-161	4	PSMG1
6.99796e-165	0.388943	0.994	0.82	1.39959e-161	4	ATG3
5.29919e-164	0.435722	0.997	0.874	1.05984e-160	4	TPI1
5.42453e-164	0.299197	0.974	0.701	1.08491e-160	4	LDB1
6.94065e-164	0.435802	0.997	0.906	1.38813e-160	4	SUPT16H
1.30751e-163	0.386899	0.989	0.749	2.61503e-160	4	CENPW
1.59144e-163	0.729579	0.89	0.478	3.18287e-160	4	HBD
2.52752e-163	0.373159	1	0.824	5.05504e-160	4	PSMD8
2.77609e-163	0.304247	0.968	0.707	5.55218e-160	4	SARS
6.5466e-163	0.391864	0.997	0.815	1.30932e-159	4	PSMC3
8.16998e-163	0.407604	1	0.897	1.634e-159	4	UQCR10
1.67245e-162	0.409913	0.964	0.744	3.3449e-159	4	HIST1H3G
2.69791e-162	0.247315	0.987	0.777	5.39582e-159	4	CTNNAL1
3.00158e-162	0.311497	0.979	0.733	6.00317e-159	4	PAK1IP1
1.93341e-161	0.475312	0.995	0.76	3.86682e-158	4	MARCKSL1
3.28441e-161	0.387326	1	0.87	6.56882e-158	4	NHP2
4.96927e-161	0.351104	0.992	0.771	9.93854e-158	4	TXN2
6.20222e-161	0.139332	0.953	0.727	1.24044e-157	4	RYR3
1.503e-160	0.386107	1	0.868	3.00599e-157	4	NDUFS6
2.03903e-160	0.250597	0.961	0.71	4.07806e-157	4	GALNT10
2.37653e-160	0.302583	0.95	0.642	4.75307e-157	4	GRPEL1
4.95717e-160	0.187897	0.868	0.436	9.91435e-157	4	PMP22
6.11083e-160	0.430725	0.998	0.922	1.22217e-156	4	METAP2
1.75125e-159	0.35509	0.987	0.78	3.50251e-156	4	STOML2
9.11618e-159	0.372541	0.984	0.776	1.82324e-155	4	NARF
1.15147e-158	0.347467	0.992	0.707	2.30294e-155	4	MPST
1.55047e-158	0.295775	0.955	0.627	3.10093e-155	4	NMNAT3
2.01096e-158	0.348509	0.997	0.816	4.02192e-155	4	SLIRP
2.78729e-158	0.102988	0.847	0.368	5.57458e-155	4	ST6GALNAC1
4.74069e-158	0.367638	0.997	0.883	9.48138e-155	4	MRPL20
7.02566e-158	0.365501	0.994	0.806	1.40513e-154	4	MRPS15
1.53143e-156	0.35623	0.998	0.84	3.06286e-153	4	NDUFA6
1.55996e-156	0.352032	0.99	0.813	3.11992e-153	4	MINOS1
1.63495e-156	0.29419	0.992	0.757	3.2699e-153	4	ACSM3
2.62201e-156	0.370702	0.998	0.941	5.24402e-153	4	SSB
3.79892e-156	0.368825	1	0.973	7.59785e-153	4	RPL4
6.94798e-156	0.204635	0.879	0.472	1.3896e-152	4	TNFRSF25
1.71793e-155	0.286043	0.96	0.685	3.43586e-152	4	STK25
2.22265e-155	0.258381	0.956	0.624	4.44529e-152	4	HAGH
2.51331e-155	0.30403	0.99	0.747	5.02661e-152	4	MRPL27
3.01654e-155	0.394482	1	0.938	6.03307e-152	4	PTGES3
7.62146e-155	0.282723	0.981	0.734	1.52429e-151	4	FXN
7.79379e-155	0.396499	0.994	0.856	1.55876e-151	4	BSG
1.92941e-154	0.388137	0.985	0.758	3.85882e-151	4	CKS1B
2.59495e-154	0.34024	0.966	0.661	5.1899e-151	4	FAM45A
1.30482e-153	0.257682	0.932	0.516	2.60963e-150	4	ICAM4
5.43905e-153	0.34874	0.976	0.758	1.08781e-149	4	TFDP1
6.66765e-152	0.345524	0.994	0.784	1.33353e-148	4	CYC1
7.43526e-152	0.284044	0.981	0.761	1.48705e-148	4	SSSCA1
1.17039e-151	0.327586	0.966	0.71	2.34077e-148	4	DTYMK
2.15678e-151	0.417007	0.998	0.854	4.31355e-148	4	HIST1H2AH
2.22935e-151	0.353749	0.982	0.808	4.45869e-148	4	ODC1
3.2426e-151	0.265695	0.905	0.601	6.4852e-148	4	PNPO
4.44916e-151	0.363729	0.998	0.895	8.89832e-148	4	CCT5
4.5317e-151	0.28923	0.934	0.66	9.0634e-148	4	PCCB
5.36311e-151	0.237783	0.866	0.454	1.07262e-147	4	PNMT
8.70697e-151	0.342085	0.995	0.844	1.74139e-147	4	TIMM8B
1.47463e-150	0.484613	0.997	0.792	2.94926e-147	4	PCNA
2.84788e-150	0.388801	1	0.906	5.69576e-147	4	ELOB
3.11287e-150	0.374748	0.995	0.82	6.22573e-147	4	SRM
6.32898e-150	0.269846	0.966	0.745	1.2658e-146	4	AIG1
6.47639e-150	0.291768	0.971	0.726	1.29528e-146	4	CCDC28B
1.38749e-149	0.153898	0.985	0.709	2.77497e-146	4	TGIF1
1.55911e-149	0.369861	1	0.887	3.11822e-146	4	POMP
2.20067e-149	0.264965	0.989	0.765	4.40134e-146	4	HIST1H3B
3.14574e-149	0.32612	0.974	0.714	6.29148e-146	4	ECI1
3.35751e-149	0.343759	0.998	0.822	6.71501e-146	4	PSMB6
5.99638e-149	0.329331	0.989	0.759	1.19928e-145	4	MRTO4
7.37099e-149	0.226495	0.916	0.5	1.4742e-145	4	GBGT1
1.9049e-148	0.477233	1	0.884	3.80979e-145	4	TFRC
2.65656e-148	0.369297	0.997	0.782	5.31312e-145	4	TUBA1C
3.90493e-148	0.373953	1	0.918	7.80987e-145	4	CCT2
6.0022e-148	0.335986	0.994	0.821	1.20044e-144	4	VDAC3
9.65606e-148	0.261717	0.898	0.619	1.93121e-144	4	FECH
1.33745e-147	0.22266	0.96	0.654	2.67491e-144	4	PLA2G12A
3.98442e-147	0.328156	0.974	0.695	7.96884e-144	4	RPA2
6.8783e-147	0.356123	0.998	0.893	1.37566e-143	4	NDUFV2
3.37796e-146	0.265833	0.958	0.735	6.75593e-143	4	OAT
4.06149e-146	0.285704	0.922	0.58	8.12298e-143	4	GFI1B
1.36066e-145	0.158847	0.984	0.822	2.72132e-142	4	HIST1H2AM
3.71177e-145	0.525624	1	0.983	7.42354e-142	4	FTH1
3.78687e-145	0.32209	0.99	0.789	7.57375e-142	4	SLC12A6
5.44555e-145	0.244292	0.976	0.635	1.08911e-141	4	FADS2
6.01779e-145	0.217706	0.808	0.264	1.20356e-141	4	LINC01133
2.34477e-144	0.352537	0.995	0.834	4.68954e-141	4	NDUFB6
4.93243e-144	0.335819	0.992	0.808	9.86485e-141	4	EIF4EBP1
7.80616e-144	0.23698	0.918	0.615	1.56123e-140	4	SRRD
1.0617e-143	0.266885	0.952	0.638	2.1234e-140	4	TSFM
2.07083e-143	0.398812	1	0.898	4.14165e-140	4	TSPO
2.40978e-143	0.340527	0.995	0.852	4.81956e-140	4	PHF6
3.0788e-143	0.310986	0.973	0.729	6.15759e-140	4	PXMP2
3.50213e-143	0.266363	0.945	0.61	7.00427e-140	4	UBE2T
4.9857e-143	0.309058	0.989	0.812	9.9714e-140	4	NDUFAF2
5.9628e-143	0.394239	1	0.929	1.19256e-139	4	TXN
6.54625e-143	0.280506	0.974	0.774	1.30925e-139	4	ACAT1
7.79345e-143	0.280714	0.955	0.645	1.55869e-139	4	DDI2
1.56881e-142	0.289513	0.973	0.686	3.13761e-139	4	SLC39A8
8.11409e-142	0.246354	0.935	0.608	1.62282e-138	4	ENDOG
8.25124e-142	0.292716	0.95	0.672	1.65025e-138	4	CENPM
1.43399e-141	0.307311	0.995	0.77	2.86797e-138	4	HDAC7
1.65928e-141	0.353141	0.998	0.873	3.31857e-138	4	CACYBP
1.87245e-141	0.319074	0.99	0.773	3.74491e-138	4	EBNA1BP2
1.29452e-140	0.211193	0.921	0.611	2.58904e-137	4	POLE2
1.47448e-140	0.116203	0.801	0.388	2.94895e-137	4	SELENBP1
1.60552e-140	0.311151	0.918	0.632	3.21103e-137	4	SLC43A3
2.13529e-140	0.49849	1	0.906	4.27057e-137	4	TUBB
4.17088e-140	0.344223	0.997	0.891	8.34175e-137	4	CCT3
5.65448e-140	0.750674	1	0.947	1.1309e-136	4	HIST1H4C
1.69997e-139	0.32877	0.994	0.859	3.39994e-136	4	ITGB1
2.76134e-139	0.339818	0.997	0.839	5.52268e-136	4	NDUFB9
4.07138e-139	0.42989	0.998	0.838	8.14275e-136	4	PDZD8
4.82963e-139	0.34188	0.994	0.842	9.65927e-136	4	CD82
1.30059e-138	0.118232	0.837	0.552	2.60118e-135	4	SEC14L2
1.49618e-138	0.314455	0.994	0.807	2.99236e-135	4	VPS29
8.05397e-138	0.267478	0.964	0.689	1.61079e-134	4	TRAP1
2.26095e-137	0.238352	0.94	0.651	4.52189e-134	4	SH3GLB2
2.3417e-137	0.427653	0.992	0.835	4.6834e-134	4	TUBB4B
5.15491e-137	0.169224	0.961	0.735	1.03098e-133	4	CNKSR3
1.99642e-136	0.236056	0.929	0.695	3.99284e-133	4	RCL1
2.50874e-136	0.249508	0.94	0.674	5.01749e-133	4	THOC3
3.48647e-136	0.252125	0.96	0.694	6.97294e-133	4	POP7
1.31569e-134	0.340477	1	0.946	2.63138e-131	4	CALM2
2.55338e-134	0.375356	1	0.919	5.10676e-131	4	PDCD4
2.80874e-134	0.340451	1	0.854	5.61749e-131	4	MRPL51
8.26098e-134	0.205172	0.869	0.654	1.6522e-130	4	DNAJA4
2.92955e-133	0.264752	0.958	0.738	5.8591e-130	4	CCDC112
5.43678e-133	0.256731	0.9	0.56	1.08736e-129	4	MAD1L1
2.08987e-132	0.372478	1	0.89	4.17973e-129	4	ATP5MF
4.05044e-132	0.31017	0.982	0.762	8.10087e-129	4	MRPL4
4.70235e-132	0.474075	1	0.928	9.40471e-129	4	H2AFZ
5.25773e-132	0.197726	0.948	0.729	1.05155e-128	4	GCLM
6.68249e-132	0.243184	0.939	0.662	1.3365e-128	4	LPCAT3
7.27616e-132	0.302393	0.99	0.805	1.45523e-128	4	TRMT10C
1.9105e-131	0.229904	0.927	0.669	3.82099e-128	4	ALAD
2.31672e-131	0.294483	0.964	0.704	4.63344e-128	4	FEN1
5.90755e-131	0.194369	0.94	0.637	1.18151e-127	4	TP53RK
7.88687e-131	0.363635	0.982	0.849	1.57737e-127	4	GLRX
9.26609e-131	0.184332	0.963	0.647	1.85322e-127	4	CSF2RB
2.9246e-130	0.255743	0.943	0.657	5.84919e-127	4	MCRIP2
3.61981e-130	0.382809	1	0.938	7.23962e-127	4	PRKDC
5.92546e-130	0.188377	0.814	0.38	1.18509e-126	4	RBPMS2
7.54756e-130	0.378122	1	0.977	1.50951e-126	4	RPS16
1.49979e-129	0.239222	0.94	0.658	2.99958e-126	4	HK1
2.20841e-129	0.320483	0.998	0.858	4.41682e-126	4	GTF2A2
2.76745e-129	0.252765	0.984	0.737	5.53491e-126	4	RAP2B
3.39549e-129	0.298822	0.985	0.788	6.79098e-126	4	RPA3
5.25395e-129	0.269989	0.977	0.725	1.05079e-125	4	ZNF593
6.77384e-129	0.249902	0.901	0.588	1.35477e-125	4	HIGD1A
9.65474e-129	0.178535	0.924	0.633	1.93095e-125	4	GMPR
3.31254e-128	0.345109	0.997	0.875	6.62508e-125	4	NDUFB2
8.18973e-128	0.203958	0.924	0.721	1.63795e-124	4	PUS7
1.08058e-127	0.355378	0.994	0.801	2.16117e-124	4	CTNNBL1
1.19818e-127	0.253246	0.931	0.674	2.39636e-124	4	ENG
3.65805e-127	0.233727	0.971	0.754	7.3161e-124	4	ORC4
5.47816e-127	0.261304	0.95	0.633	1.09563e-123	4	PPIF
1.42921e-126	0.285764	0.99	0.806	2.85843e-123	4	MRPS25
1.80682e-126	0.274004	0.961	0.696	3.61363e-123	4	MRPL13
2.2394e-126	0.363819	1	0.982	4.4788e-123	4	NPM1
2.7873e-126	0.330761	0.998	0.883	5.57461e-123	4	UQCRQ
2.90424e-126	0.221332	0.934	0.638	5.80849e-123	4	TSPAN4
3.18353e-126	0.265201	0.976	0.742	6.36706e-123	4	NDUFA8
6.51762e-126	0.187433	0.921	0.666	1.30352e-122	4	PCYT2
1.24817e-125	0.300162	0.998	0.871	2.49633e-122	4	PDAP1
2.00729e-125	0.253679	0.937	0.663	4.01459e-122	4	DTL
5.16053e-125	0.260093	0.966	0.736	1.03211e-121	4	AK6
1.34356e-124	0.301426	0.979	0.784	2.68713e-121	4	KIF20B
1.99077e-124	0.193062	0.943	0.688	3.98153e-121	4	ABCC5
3.39842e-124	0.261331	0.948	0.67	6.79685e-121	4	RFC4
4.84733e-124	0.23711	0.945	0.63	9.69466e-121	4	NT5DC2
5.36183e-124	0.274116	0.973	0.747	1.07237e-120	4	PRDX4
1.38805e-123	0.26108	0.916	0.606	2.7761e-120	4	MGAT4B
2.09707e-123	0.214305	0.872	0.534	4.19413e-120	4	C9orf40
2.51594e-123	0.188571	0.901	0.699	5.03188e-120	4	CAPRIN2
3.19395e-123	0.235443	0.935	0.65	6.38789e-120	4	MRPL17
3.48965e-123	0.167208	0.961	0.745	6.97929e-120	4	HIST1H2BH
1.24706e-122	0.230268	0.931	0.715	2.49412e-119	4	CBLL1
1.68167e-122	0.239411	0.968	0.679	3.36334e-119	4	EPSTI1
2.88926e-122	0.315024	0.998	0.853	5.77851e-119	4	NDUFC2
1.00342e-121	0.237559	0.971	0.746	2.00684e-118	4	PARVB
1.01433e-121	0.331821	1	0.913	2.02865e-118	4	RIF1
1.0507e-121	0.220129	0.926	0.581	2.1014e-118	4	MRPL35
3.07777e-121	0.310264	1	0.869	6.15555e-118	4	PPM1G
3.25056e-121	0.211694	0.859	0.533	6.50113e-118	4	ROGDI
4.59009e-121	0.214877	0.948	0.76	9.18018e-118	4	SSX2IP
1.1567e-120	0.361833	0.997	0.871	2.3134e-117	4	PPA1
1.441e-120	0.246869	0.984	0.771	2.882e-117	4	EEF1E1
1.60503e-120	0.157442	0.884	0.488	3.21007e-117	4	PRKAB1
1.36723e-119	0.2247	0.948	0.666	2.73446e-116	4	MPDU1
1.985e-119	0.225222	0.922	0.629	3.97001e-116	4	APEH
2.27644e-119	0.197395	0.974	0.785	4.55288e-116	4	CDC27
2.96432e-119	0.171122	0.808	0.371	5.92865e-116	4	XK
1.16991e-118	0.24691	0.982	0.79	2.33981e-115	4	UGGT1
1.41921e-118	0.235384	0.913	0.655	2.83843e-115	4	ARV1
2.14377e-118	0.186534	0.958	0.763	4.28755e-115	4	HIST1H2AL
3.74022e-118	0.223638	0.826	0.501	7.48044e-115	4	CCNE1
5.17916e-118	0.198908	0.939	0.654	1.03583e-114	4	YIF1B
7.3833e-118	0.2966	0.99	0.83	1.47666e-114	4	PSMB2
7.51845e-118	0.198723	0.945	0.672	1.50369e-114	4	RRP1
1.21309e-117	0.25847	0.955	0.709	2.42618e-114	4	C20orf27
1.26311e-117	0.300476	0.998	0.858	2.52623e-114	4	SNRPC
1.3325e-117	0.256907	0.976	0.758	2.66499e-114	4	POLD2
1.78757e-117	0.261529	0.968	0.735	3.57513e-114	4	CISD2
1.99245e-117	0.355102	0.784	0.337	3.9849e-114	4	HBA1
3.37396e-117	0.398114	1	0.874	6.74792e-114	4	NAA38
7.10857e-117	0.248726	0.95	0.712	1.42171e-113	4	CMAS
1.10966e-116	0.190392	0.869	0.63	2.21932e-113	4	HOOK1
1.11799e-116	0.267014	0.998	0.829	2.23597e-113	4	WEE1
1.20752e-116	0.217299	0.9	0.578	2.41503e-113	4	RRS1
1.31117e-116	0.187624	0.864	0.57	2.62235e-113	4	PYCR1
3.19382e-116	0.253093	0.984	0.809	6.38763e-113	4	NDFIP1
3.67269e-116	0.215125	0.926	0.613	7.34538e-113	4	NOP16
4.24734e-116	0.204565	0.898	0.619	8.49467e-113	4	CCNA2
4.55779e-116	0.263944	0.968	0.729	9.11559e-113	4	MRPS12
5.70855e-116	0.228445	0.964	0.712	1.14171e-112	4	SNRNP25
6.08304e-116	0.196144	0.9	0.631	1.21661e-112	4	FRAT2
1.04956e-115	0.135107	0.961	0.622	2.09912e-112	4	UBE2C
1.34978e-115	0.213495	0.961	0.749	2.69956e-112	4	PKIG
2.52728e-115	0.221531	0.977	0.786	5.05457e-112	4	PGRMC2
2.80346e-115	0.334361	1	0.995	5.60691e-112	4	HMGB1
5.69645e-115	0.171675	0.911	0.64	1.13929e-111	4	MYBL2
6.36735e-115	0.253124	0.953	0.658	1.27347e-111	4	MRPL15
7.79694e-115	0.274391	0.987	0.764	1.55939e-111	4	UQCRC1
8.08468e-115	0.225409	0.931	0.68	1.61694e-111	4	MCM10
1.17232e-114	0.32267	0.995	0.788	2.34465e-111	4	MCM7
1.27589e-114	0.206733	0.924	0.63	2.55178e-111	4	BCL2L12
1.57224e-114	0.155121	0.898	0.544	3.14448e-111	4	CENPN
1.87437e-114	0.211585	0.759	0.265	3.74875e-111	4	TMEM56
5.24683e-114	0.289892	0.968	0.712	1.04937e-110	4	UNG
5.90786e-114	0.194459	0.879	0.616	1.18157e-110	4	GEMIN5
7.2224e-114	0.302161	0.997	0.861	1.44448e-110	4	PRMT1
8.50874e-114	0.291886	0.998	0.867	1.70175e-110	4	SIVA1
7.6944e-113	0.206	0.942	0.717	1.53888e-109	4	CYB5A
8.84028e-113	0.3412	0.984	0.797	1.76806e-109	4	CKS2
1.40104e-112	0.163927	0.89	0.576	2.80207e-109	4	SKA3
1.6332e-112	0.214203	0.947	0.644	3.26639e-109	4	RNF5
2.35458e-112	0.218668	0.935	0.677	4.70915e-109	4	ACSS1
2.58519e-112	0.192287	0.9	0.623	5.17038e-109	4	ABCB10
3.02116e-112	0.230988	0.968	0.73	6.04231e-109	4	MRPL37
3.45704e-112	0.206264	0.932	0.683	6.91409e-109	4	MTX1
4.68164e-112	0.336922	0.995	0.805	9.36328e-109	4	MCM3
5.31177e-112	0.156996	0.876	0.614	1.06235e-108	4	PDSS1
1.7884e-111	0.117749	0.777	0.333	3.5768e-108	4	CCND1
2.6136e-111	0.325783	1	0.903	5.2272e-108	4	ERH
4.06952e-111	0.239151	0.963	0.747	8.13903e-108	4	FH
1.02038e-110	0.186035	0.89	0.67	2.04076e-107	4	B3GALNT1
1.19571e-110	0.211791	0.871	0.607	2.39142e-107	4	DHRS11
1.75015e-110	0.319355	1	0.886	3.50031e-107	4	PSMA4
1.92253e-110	0.182987	0.927	0.68	3.84506e-107	4	TAL1
3.62646e-110	0.414671	1	0.941	7.25292e-107	4	TUBA1B
4.06823e-110	0.268332	0.964	0.724	8.13646e-107	4	DCTPP1
4.9371e-110	0.187326	0.853	0.541	9.8742e-107	4	PPIL1
5.26363e-110	0.182651	0.889	0.62	1.05273e-106	4	RRP9
7.35976e-110	0.109167	0.871	0.679	1.47195e-106	4	AC002467.1
8.67458e-110	0.253591	0.987	0.802	1.73492e-106	4	VRK1
9.23694e-110	0.241191	0.961	0.726	1.84739e-106	4	GPATCH4
9.53973e-110	0.160822	0.929	0.729	1.90795e-106	4	MNS1
1.07635e-109	0.223192	0.958	0.69	2.15269e-106	4	DAAM1
1.09356e-109	0.181014	0.9	0.608	2.18712e-106	4	CCNB2
1.44025e-109	0.28579	0.998	0.879	2.88049e-106	4	LSM3
2.54434e-109	0.256712	0.976	0.781	5.08868e-106	4	MSH2
7.22092e-109	0.250289	0.984	0.805	1.44418e-105	4	MRPL47
8.02094e-109	0.239705	0.987	0.801	1.60419e-105	4	GTPBP4
8.60918e-109	0.183295	0.913	0.632	1.72184e-105	4	CCNB1
1.11001e-108	0.278382	0.998	0.857	2.22002e-105	4	CLTC
2.05824e-108	0.261262	0.94	0.682	4.11647e-105	4	GINS2
2.22741e-108	0.214967	0.935	0.672	4.45482e-105	4	TMEM70
2.68553e-108	0.244307	0.981	0.8	5.37107e-105	4	ECI2
2.80698e-108	0.280806	1	0.912	5.61396e-105	4	HSPA9
3.43009e-108	0.242784	0.889	0.667	6.86017e-105	4	CDK1
4.84381e-108	0.141047	0.832	0.543	9.68761e-105	4	DNAJC6
9.25211e-108	0.147086	0.856	0.573	1.85042e-104	4	POC1A
1.14019e-107	0.100751	0.777	0.367	2.28038e-104	4	PLEKHG1
1.30288e-107	0.266696	0.989	0.83	2.60576e-104	4	SSRP1
4.33876e-107	0.308934	1	0.891	8.67752e-104	4	PARK7
4.49218e-107	0.255516	0.984	0.811	8.98437e-104	4	MRPS26
5.09386e-107	0.195199	0.945	0.676	1.01877e-103	4	DPM2
5.46296e-107	0.209099	0.948	0.709	1.09259e-103	4	RFK
5.73318e-107	0.213095	0.979	0.769	1.14664e-103	4	MRPS7
8.02233e-107	0.180732	0.958	0.711	1.60447e-103	4	XRCC2
1.4643e-106	0.226952	0.963	0.72	2.9286e-103	4	MRPS23
4.34565e-106	0.244812	0.985	0.78	8.69131e-103	4	CHAF1A
6.90952e-106	0.276116	0.99	0.793	1.3819e-102	4	HPRT1
1.5413e-105	0.106258	0.756	0.233	3.08259e-102	4	COL6A5
1.87319e-105	0.2815	0.997	0.848	3.74639e-102	4	ETFB
3.08737e-105	0.362321	1	0.979	6.17475e-102	4	RPSA
4.09202e-105	0.22101	0.94	0.688	8.18404e-102	4	MRPS9
9.95617e-105	0.261046	0.998	0.833	1.99123e-101	4	NDUFAB1
2.10232e-104	0.304504	0.998	0.864	4.20463e-101	4	LSM4
2.71216e-104	0.250609	0.939	0.745	5.42432e-101	4	ZFP36L1
1.08307e-103	0.240688	0.984	0.776	2.16614e-100	4	CMSS1
1.19317e-103	0.136383	0.847	0.651	2.38633e-100	4	FN3K
4.61715e-103	0.18963	0.977	0.798	9.23429e-100	4	TOMM5
6.53565e-103	0.192642	0.961	0.75	1.30713e-99	4	SASS6
7.87105e-103	0.204845	0.953	0.707	1.57421e-99	4	GOT2
8.90902e-103	0.207685	0.955	0.707	1.7818e-99	4	PITHD1
1.00277e-102	0.111386	0.934	0.725	2.00553e-99	4	CENPE
1.13863e-102	0.227427	0.971	0.737	2.27725e-99	4	HACD3
1.50207e-102	0.290517	0.998	0.907	3.00415e-99	4	SNRPE
1.62553e-102	0.194628	0.942	0.639	3.25105e-99	4	CDKN2AIP
1.81497e-102	0.286812	0.997	0.857	3.62995e-99	4	DKC1
5.76647e-102	0.261724	0.992	0.804	1.15329e-98	4	MGST2
6.56709e-102	0.230077	0.969	0.721	1.31342e-98	4	MTHFD1
1.37699e-101	0.23802	0.992	0.78	2.75398e-98	4	CENPH
3.73689e-101	0.189312	0.913	0.655	7.47379e-98	4	ATAD3A
5.07912e-101	0.238043	0.987	0.807	1.01582e-97	4	MPP1
5.19554e-101	0.256835	0.966	0.729	1.03911e-97	4	PGAM1
5.41495e-101	0.156463	0.885	0.728	1.08299e-97	4	DLGAP5
8.82835e-101	0.230341	0.982	0.787	1.76567e-97	4	CENPK
1.35818e-100	0.215472	0.96	0.727	2.71635e-97	4	APOBEC3C
1.52501e-100	0.1343	0.806	0.51	3.05001e-97	4	ERCC6L
1.94874e-100	0.211852	0.973	0.752	3.89749e-97	4	ORC6
3.17486e-100	0.208478	0.95	0.734	6.34972e-97	4	RFC3
4.90112e-100	0.179056	0.908	0.576	9.80225e-97	4	PNP
7.31576e-100	0.133625	0.845	0.508	1.46315e-96	4	DLC1
7.96956e-100	0.111981	0.997	0.857	1.59391e-96	4	CENPF
1.72359e-99	0.150848	0.83	0.477	3.44719e-96	4	CDC25A
1.98029e-99	0.150121	0.826	0.556	3.96059e-96	4	DAG1
3.11024e-99	0.257107	0.992	0.846	6.22049e-96	4	TXNL1
3.62791e-99	0.253106	0.981	0.811	7.25583e-96	4	RUVBL1
1.32971e-98	0.240324	0.974	0.785	2.65941e-95	4	UBE2M
2.55447e-98	0.188111	0.937	0.662	5.10894e-95	4	IFRD2
5.92819e-98	0.290073	0.997	0.889	1.18564e-94	4	COX7B
6.20809e-98	0.263519	0.989	0.825	1.24162e-94	4	MDH2
6.23279e-98	0.162677	0.903	0.638	1.24656e-94	4	TTLL12
7.62863e-98	0.245636	0.927	0.716	1.52573e-94	4	TK1
8.18134e-98	0.123832	0.827	0.604	1.63627e-94	4	IL7
9.10213e-98	0.237046	0.971	0.796	1.82043e-94	4	HMGB3
1.22039e-97	0.186345	0.937	0.664	2.44078e-94	4	EXOSC7
5.89557e-97	0.255235	0.994	0.854	1.17911e-93	4	SRI
1.01926e-96	0.131325	0.921	0.696	2.03851e-93	4	RBM38
2.08139e-96	0.260695	0.995	0.893	4.16278e-93	4	ZNF706
2.28166e-96	0.246109	0.979	0.8	4.56332e-93	4	UBE2S
3.27833e-96	0.221539	0.989	0.82	6.55667e-93	4	JPT1
4.72082e-96	0.25725	0.994	0.851	9.44164e-93	4	GTF3C6
6.10056e-96	0.198792	0.942	0.714	1.22011e-92	4	MRPS2
6.16249e-96	0.168245	0.942	0.677	1.2325e-92	4	FLOT2
6.41242e-96	0.227626	0.997	0.825	1.28248e-92	4	RREB1
9.58806e-96	0.101639	0.961	0.774	1.91761e-92	4	TOP2A
1.02908e-95	0.212694	0.929	0.706	2.05815e-92	4	MTCH2
1.09719e-95	0.19808	0.966	0.801	2.19437e-92	4	DLD
1.48692e-95	0.268448	0.998	0.865	2.97385e-92	4	TUFM
1.8221e-95	0.186089	0.856	0.556	3.64419e-92	4	SLC29A1
8.43648e-95	0.133554	0.939	0.696	1.6873e-91	4	ABCC4
1.02644e-94	0.167348	0.905	0.66	2.05287e-91	4	UMPS
1.29713e-94	0.184579	0.884	0.591	2.59426e-91	4	EPDR1
1.50315e-94	0.17744	0.943	0.682	3.00629e-91	4	POLR3K
1.73587e-94	0.144495	0.89	0.674	3.47174e-91	4	ESCO2
1.87804e-94	0.168568	0.805	0.51	3.75608e-91	4	AURKA
2.16224e-94	0.267711	1	0.909	4.32447e-91	4	ATP5F1B
3.36301e-94	0.171069	0.922	0.715	6.72602e-91	4	MND1
4.3219e-94	0.161273	0.84	0.627	8.6438e-91	4	SUCLG2
4.79852e-94	0.184526	0.937	0.685	9.59704e-91	4	SLC25A39
6.59721e-94	0.125052	0.829	0.53	1.31944e-90	4	HPDL
7.48872e-94	0.195568	0.955	0.704	1.49774e-90	4	MTHFD2
8.66783e-94	0.19359	0.96	0.8	1.73357e-90	4	KMT5A
1.08961e-93	0.153351	0.869	0.592	2.17922e-90	4	RCCD1
1.09612e-93	0.122324	0.848	0.659	2.19224e-90	4	PDK3
1.35447e-93	0.18388	0.953	0.723	2.70895e-90	4	TPX2
1.54285e-93	0.224316	0.99	0.811	3.0857e-90	4	TAF9
2.15673e-93	0.198956	0.979	0.788	4.31347e-90	4	RMDN1
4.18256e-93	0.403452	0.742	0.247	8.36511e-90	4	NMU
6.27351e-93	0.184557	0.924	0.675	1.2547e-89	4	FAM207A
1.21275e-92	0.272343	1	0.996	2.42549e-89	4	PTMA
1.21613e-92	0.173823	0.992	0.806	2.43226e-89	4	PSTPIP2
3.30657e-92	0.196223	0.973	0.737	6.61314e-89	4	PGP
1.18429e-91	0.156025	0.885	0.697	2.36859e-88	4	SPC25
1.20788e-91	0.235996	0.979	0.787	2.41576e-88	4	DECR1
1.81194e-91	0.204321	0.968	0.76	3.62388e-88	4	HIST1H2AG
1.92045e-91	0.162382	0.918	0.702	3.8409e-88	4	C6orf89
2.2646e-91	0.229137	0.977	0.781	4.52921e-88	4	TXNDC17
2.77982e-91	0.286554	0.998	0.894	5.55964e-88	4	APRT
3.2459e-91	0.230177	0.955	0.729	6.4918e-88	4	PPIH
4.16164e-91	0.223599	0.963	0.666	8.32329e-88	4	CDT1
4.25469e-91	0.147729	0.879	0.724	8.50937e-88	4	C2orf88
4.68145e-91	0.275391	0.984	0.788	9.3629e-88	4	MCM5
9.74646e-91	0.148093	0.872	0.661	1.94929e-87	4	NADK2
1.05381e-90	0.191684	0.858	0.652	2.10761e-87	4	RRM2
1.25688e-90	0.288886	1	0.963	2.51377e-87	4	PPIA
1.81121e-90	0.177706	0.929	0.68	3.62242e-87	4	VARS
2.71383e-90	0.20483	0.966	0.771	5.42766e-87	4	CLSPN
2.97543e-90	0.224549	0.976	0.818	5.95085e-87	4	NIPSNAP2
1.09982e-89	0.225178	0.748	0.346	2.19963e-86	4	GAL
1.50853e-89	0.215724	0.984	0.813	3.01706e-86	4	GNB2
1.92297e-89	0.178498	0.922	0.671	3.84594e-86	4	ZWINT
2.65051e-89	0.141524	0.89	0.615	5.30101e-86	4	GCAT
2.81174e-89	0.199124	0.966	0.752	5.62348e-86	4	EIF2S1
4.83538e-89	0.20958	0.987	0.804	9.67076e-86	4	PSMD14
5.36272e-89	0.211958	0.948	0.687	1.07254e-85	4	MAD2L1
1.42896e-88	0.192362	0.953	0.728	2.85793e-85	4	CCDC124
1.44702e-88	0.165448	0.919	0.656	2.89404e-85	4	NIP7
2.35382e-88	0.169223	0.892	0.645	4.70763e-85	4	C8orf82
2.59947e-88	0.168464	0.834	0.539	5.19894e-85	4	HAGHL
6.34257e-88	0.252618	0.971	0.777	1.26851e-84	4	MCM6
1.56502e-87	0.153375	0.879	0.681	3.13003e-84	4	PNO1
1.62222e-87	0.108207	0.877	0.545	3.24445e-84	4	SLC38A5
1.95697e-87	0.135122	0.848	0.646	3.91393e-84	4	E2F8
2.23019e-87	0.141161	0.99	0.783	4.46038e-84	4	MXD1
2.2908e-87	0.173435	0.918	0.671	4.5816e-84	4	VPS25
7.89349e-87	0.132154	0.935	0.736	1.5787e-83	4	SLFN13
8.16875e-87	0.210422	0.976	0.797	1.63375e-83	4	RPS19BP1
1.08083e-86	0.152095	0.872	0.616	2.16167e-83	4	SIGMAR1
1.88349e-86	0.153648	0.774	0.584	3.76698e-83	4	GRTP1
2.37151e-86	0.146774	0.859	0.658	4.74303e-83	4	TMEM14A
4.26421e-86	0.19022	0.974	0.81	8.52843e-83	4	BID
4.36746e-86	0.13426	0.843	0.612	8.73492e-83	4	PIP5K1B
4.79226e-86	0.159597	0.85	0.634	9.58451e-83	4	AMMECR1
5.31512e-86	0.211648	0.981	0.817	1.06302e-82	4	POLR2E
7.80913e-86	0.171112	0.88	0.618	1.56183e-82	4	NDUFAF4
2.14992e-85	0.162959	0.889	0.673	4.29984e-82	4	CDC6
3.68986e-85	0.185922	0.966	0.755	7.37972e-82	4	CHEK1
3.81167e-85	0.223049	0.99	0.775	7.62334e-82	4	TIMP1
3.94533e-85	0.134871	0.805	0.561	7.89067e-82	4	PRKAR1B
4.50288e-85	0.206644	0.968	0.773	9.00576e-82	4	RUVBL2
6.14311e-85	0.193801	0.898	0.625	1.22862e-81	4	SORD
7.19843e-85	0.184837	0.887	0.693	1.43969e-81	4	BIRC5
8.75217e-85	0.138695	0.764	0.498	1.75043e-81	4	PBK
1.14454e-84	0.198418	0.955	0.727	2.28909e-81	4	H2AFX
1.26917e-84	0.136625	0.84	0.603	2.53834e-81	4	SPC24
1.33399e-84	0.14979	0.926	0.68	2.66798e-81	4	E2F4
1.77343e-84	0.232978	0.994	0.865	3.54686e-81	4	ILF2
2.99798e-84	0.188233	0.977	0.818	5.99596e-81	4	SOS1
4.80306e-84	0.202704	0.969	0.781	9.60612e-81	4	PCMT1
5.88084e-84	0.181842	0.998	0.872	1.17617e-80	4	CST3
7.96521e-84	0.340027	1	0.936	1.59304e-80	4	HIST2H2AC
2.24626e-83	0.16556	0.735	0.368	4.49252e-80	4	TGM2
2.25739e-83	0.187411	0.973	0.752	4.51478e-80	4	CCDC34
3.04591e-83	0.173141	0.908	0.646	6.09182e-80	4	SLC39A4
8.14455e-83	0.165667	0.942	0.749	1.62891e-79	4	DCUN1D5
1.15702e-82	0.371805	1	0.967	2.31405e-79	4	EEF1B2
1.59545e-82	0.248498	1	0.872	3.19091e-79	4	PAICS
2.88916e-82	0.168415	0.982	0.821	5.77832e-79	4	PLXNC1
3.1261e-82	0.153475	0.939	0.723	6.2522e-79	4	UBE2J2
3.71414e-82	0.280944	1	0.946	7.42828e-79	4	UBB
4.77501e-82	0.142292	0.801	0.555	9.55003e-79	4	HOMER2
6.94113e-82	0.108034	0.842	0.629	1.38823e-78	4	PIR
1.31989e-81	0.168941	0.931	0.689	2.63978e-78	4	CASP6
1.3385e-81	0.212475	0.992	0.889	2.67699e-78	4	CYCS
1.68093e-81	0.140066	0.893	0.64	3.36186e-78	4	ABHD5
2.90421e-81	0.135155	0.83	0.702	5.80842e-78	4	ANKRD9
5.72435e-81	0.19134	0.969	0.806	1.14487e-77	4	STIP1
1.1179e-80	0.195085	0.974	0.816	2.2358e-77	4	PPA2
1.21364e-80	0.257425	0.998	0.892	2.42728e-77	4	CD63
1.42611e-80	0.12654	0.838	0.588	2.85222e-77	4	SLC48A1
2.57228e-80	0.125758	0.897	0.653	5.14457e-77	4	PPRC1
2.92532e-80	0.147381	0.929	0.693	5.85064e-77	4	TIMM17A
4.14979e-80	0.249852	0.987	0.844	8.29957e-77	4	ALDH1A1
8.89625e-80	0.137115	0.911	0.724	1.77925e-76	4	WDHD1
1.0169e-79	0.180209	0.942	0.726	2.03381e-76	4	CSE1L
1.43667e-79	0.158906	0.887	0.604	2.87333e-76	4	BOP1
1.58499e-79	0.177805	0.961	0.818	3.16998e-76	4	BCAP29
2.55794e-79	0.179625	0.958	0.751	5.11589e-76	4	RRM1
4.51893e-79	0.124993	0.856	0.651	9.03787e-76	4	NCAPH
5.47014e-79	0.211825	0.998	0.88	1.09403e-75	4	EIF4G1
5.741e-79	0.109674	0.916	0.712	1.1482e-75	4	NDC80
6.40611e-79	0.145265	0.914	0.715	1.28122e-75	4	EIF2B3
8.34909e-79	0.201616	0.977	0.828	1.66982e-75	4	SERPINE2
9.11214e-79	0.135902	0.874	0.677	1.82243e-75	4	BAG2
9.68663e-79	0.111395	0.966	0.759	1.93733e-75	4	KIF13A
1.02925e-78	0.136184	0.816	0.586	2.0585e-75	4	CPOX
1.22364e-78	0.117529	0.856	0.598	2.44729e-75	4	METTL1
1.3904e-78	0.134682	0.868	0.632	2.7808e-75	4	RILP
2.3978e-78	0.236662	0.971	0.79	4.79559e-75	4	AKR1C3
4.23938e-78	0.222556	0.995	0.86	8.47875e-75	4	PSMB3
4.49337e-78	0.151317	0.764	0.476	8.98674e-75	4	TSPAN17
4.91603e-78	0.176367	0.956	0.782	9.83206e-75	4	UCHL5
9.35803e-78	0.336097	1	0.994	1.87161e-74	4	RPS2
1.40443e-77	0.187381	0.968	0.723	2.80886e-74	4	DHFR
1.49025e-77	0.13515	0.858	0.612	2.9805e-74	4	CLUH
1.79154e-77	0.102421	0.858	0.589	3.58308e-74	4	NUF2
5.07532e-77	0.133944	0.864	0.647	1.01506e-73	4	TUBG1
8.7226e-77	0.126507	0.861	0.588	1.74452e-73	4	SLC27A2
9.19533e-77	0.126152	0.859	0.643	1.83907e-73	4	AGPAT3
1.14605e-76	0.179389	0.966	0.74	2.29209e-73	4	GLRX3
2.05496e-76	0.204676	0.985	0.83	4.10992e-73	4	FDPS
2.6386e-76	0.111924	0.953	0.751	5.27721e-73	4	PTTG1
5.92841e-76	0.260401	1	0.945	1.18568e-72	4	EIF3A
2.45926e-75	0.204542	0.732	0.398	4.91852e-72	4	RHAG
2.53005e-75	0.123341	0.869	0.59	5.06009e-72	4	PPAN
3.33821e-75	0.149318	0.903	0.608	6.67641e-72	4	GGH
4.23196e-75	0.182641	0.961	0.775	8.46393e-72	4	MT2A
6.29018e-75	0.128493	0.908	0.655	1.25804e-71	4	FAM118A
1.15478e-74	0.168152	0.937	0.717	2.30955e-71	4	RFC2
1.22774e-74	0.123013	0.861	0.663	2.45548e-71	4	PARPBP
1.77514e-74	0.220723	1	0.947	3.55027e-71	4	STMN1
2.54352e-74	0.192025	0.979	0.797	5.08703e-71	4	HSPA4
3.04547e-74	0.271563	0.998	0.918	6.09094e-71	4	LDHA
4.98187e-74	0.205525	0.984	0.843	9.96375e-71	4	UQCRFS1
7.10183e-74	0.109091	0.788	0.517	1.42037e-70	4	MICAL2
1.16568e-73	0.132052	0.885	0.633	2.33136e-70	4	PTGES2
1.41175e-73	0.129029	0.814	0.563	2.8235e-70	4	ACOT7
1.75474e-73	0.144445	0.887	0.633	3.50947e-70	4	WDR77
1.75994e-73	0.108223	0.79	0.496	3.51988e-70	4	OIP5
2.79199e-73	0.105057	0.855	0.689	5.58397e-70	4	TENT5C
2.99628e-73	0.122975	0.948	0.771	5.99255e-70	4	FANCI
3.93715e-73	0.209921	1	0.926	7.87429e-70	4	TMPO
5.52546e-73	0.134162	0.895	0.655	1.10509e-69	4	PUS1
8.28255e-73	0.208381	0.985	0.846	1.65651e-69	4	POLE3
9.66588e-73	0.121309	0.929	0.763	1.93318e-69	4	CCDC69
1.60203e-72	0.171016	0.961	0.807	3.20406e-69	4	VBP1
1.69617e-72	0.153376	0.943	0.726	3.39234e-69	4	RRP7A
2.40567e-72	0.154765	0.927	0.642	4.81134e-69	4	PDLIM1
3.56336e-72	0.148317	0.998	0.839	7.12672e-69	4	HPS4
4.06381e-72	0.210595	0.974	0.812	8.12763e-69	4	BAG1
6.35467e-72	0.172481	0.963	0.765	1.27093e-68	4	YEATS4
8.1963e-72	0.122572	0.787	0.52	1.63926e-68	4	MRPS17
1.3409e-71	0.115791	0.887	0.671	2.6818e-68	4	FBH1
1.39431e-71	0.157316	0.931	0.714	2.78861e-68	4	IMP4
1.58582e-71	0.159505	0.948	0.783	3.17164e-68	4	LRRCC1
2.04173e-71	0.131542	0.837	0.554	4.08346e-68	4	PRMT5
2.72972e-71	0.151573	0.935	0.725	5.45943e-68	4	MRPS10
2.97865e-71	0.173915	0.994	0.874	5.95729e-68	4	USP14
3.69613e-71	0.136462	0.945	0.704	7.39226e-68	4	RPF2
3.84888e-71	0.115436	0.851	0.712	7.69776e-68	4	STX2
3.96048e-71	0.130335	0.826	0.553	7.92095e-68	4	CDC45
4.36466e-71	0.108285	0.872	0.699	8.72932e-68	4	FOXM1
9.25547e-71	0.14618	0.968	0.797	1.85109e-67	4	COA1
1.12239e-70	0.255835	0.979	0.788	2.24478e-67	4	CYTL1
2.94698e-70	0.151199	0.943	0.773	5.89396e-67	4	LTV1
5.41897e-70	0.109237	0.772	0.473	1.08379e-66	4	ANKLE1
5.72799e-70	0.186144	0.985	0.804	1.1456e-66	4	SNRPA1
6.48581e-70	0.148788	0.898	0.691	1.29716e-66	4	TIMM50
1.15288e-69	0.116799	0.801	0.546	2.30577e-66	4	PINX1.1
2.53054e-69	0.13153	0.905	0.734	5.06108e-66	4	ARHGAP11A
3.00008e-69	0.329298	1	0.983	6.00017e-66	4	RPL7A
3.03037e-69	0.173223	0.99	0.891	6.06074e-66	4	DSTN
3.11495e-69	0.125145	0.774	0.5	6.22989e-66	4	COMTD1
3.65499e-69	0.153663	0.827	0.609	7.30997e-66	4	CD3EAP
2.41889e-68	0.193567	0.995	0.857	4.83779e-65	4	CALM3
2.84491e-68	0.190562	0.985	0.843	5.68982e-65	4	SMC2
1.0205e-67	0.279013	0.998	0.939	2.04099e-64	4	LDHB
1.35879e-67	0.272769	1	0.968	2.71758e-64	4	FTL
2.86106e-67	0.125016	0.884	0.639	5.72211e-64	4	RANGAP1
9.7316e-67	0.130369	0.977	0.739	1.94632e-63	4	SLC40A1
2.0534e-66	0.124967	0.879	0.678	4.10681e-63	4	TEX30
2.32923e-66	0.166314	0.964	0.762	4.65846e-63	4	BUB3
1.93692e-65	0.154593	0.931	0.762	3.87385e-62	4	RHOBTB3
3.9776e-65	0.13535	0.879	0.653	7.9552e-62	4	UBE2F
5.08749e-65	0.165008	0.969	0.792	1.0175e-61	4	HSPH1
7.64543e-65	0.112082	0.821	0.6	1.52909e-61	4	PIGQ
1.49214e-64	0.169902	0.968	0.784	2.98427e-61	4	DDX39A
1.90233e-64	0.121375	0.848	0.612	3.80467e-61	4	CDCA5
2.0858e-64	0.120141	0.847	0.612	4.17161e-61	4	RFC5
2.94685e-64	0.190884	0.981	0.831	5.8937e-61	4	PRDX3
3.99108e-64	0.122874	0.876	0.629	7.98216e-61	4	AIMP2
4.07497e-64	0.168082	0.973	0.812	8.14994e-61	4	MRPL3
4.22686e-64	0.139043	0.882	0.648	8.45371e-61	4	AGTRAP
8.01467e-64	0.110749	0.8	0.577	1.60293e-60	4	PKMYT1
8.99687e-64	0.115167	0.913	0.668	1.79937e-60	4	RCC1
9.18217e-64	0.20932	0.987	0.817	1.83643e-60	4	MCM4
1.04585e-63	0.217857	0.903	0.64	2.0917e-60	4	NPW
1.05893e-63	0.10428	0.805	0.574	2.11786e-60	4	PTRH1
1.56613e-63	0.146389	0.94	0.747	3.13226e-60	4	GARS
2.70224e-63	0.162184	0.927	0.703	5.40448e-60	4	PPID
3.62017e-63	0.165824	0.998	0.896	7.24035e-60	4	CKAP2
3.99349e-63	0.201606	0.994	0.864	7.98697e-60	4	USP1
5.38614e-63	0.106523	0.83	0.622	1.07723e-59	4	ATAD3B
1.16196e-62	0.208696	0.995	0.851	2.32393e-59	4	IDH2
1.38079e-62	0.171852	0.985	0.832	2.76158e-59	4	ADI1
2.08914e-62	0.116845	0.751	0.563	4.17827e-59	4	SLC25A15
4.19517e-62	0.125796	0.898	0.745	8.39034e-59	4	TIMM44
5.26124e-62	0.110025	0.745	0.523	1.05225e-58	4	ATP7B
6.70963e-62	0.136324	0.897	0.648	1.34193e-58	4	TMEM106C
2.08534e-61	0.103502	0.835	0.642	4.17068e-58	4	PPARA
4.33514e-61	0.100813	0.745	0.478	8.67028e-58	4	AUNIP
7.36097e-61	0.130497	0.817	0.608	1.47219e-57	4	RPL39L
1.28671e-60	0.111906	0.85	0.659	2.57343e-57	4	UTP4
2.83429e-60	0.162472	0.982	0.861	5.66857e-57	4	NOLC1
3.01013e-60	0.107523	0.84	0.611	6.02027e-57	4	POLA2
4.00147e-60	0.164438	1	0.979	8.00293e-57	4	ACTB
1.51054e-59	0.171846	0.989	0.868	3.02109e-56	4	WDR43
5.39259e-59	0.108081	0.774	0.581	1.07852e-55	4	HCCS
6.61763e-59	0.102069	0.774	0.571	1.32353e-55	4	MFHAS1
1.49757e-58	0.111199	0.968	0.794	2.99513e-55	4	LIG1
2.13263e-58	0.117815	0.887	0.689	4.26526e-55	4	THG1L
3.36233e-58	0.137826	0.767	0.602	6.72467e-55	4	MOSPD3
8.11959e-58	0.108029	0.67	0.23	1.62392e-54	4	NCS1
3.8617e-57	0.242963	1	0.975	7.72339e-54	4	RPL23
4.75072e-57	0.119316	0.971	0.793	9.50144e-54	4	BRCA2
5.14192e-57	0.134852	0.937	0.757	1.02838e-53	4	LRRC59
7.58787e-57	0.104512	0.845	0.58	1.51757e-53	4	DNAJA3
1.11265e-56	0.102506	0.767	0.502	2.2253e-53	4	LHPP
1.24111e-56	0.121828	0.942	0.763	2.48222e-53	4	TSR1
1.52202e-56	0.130637	0.96	0.777	3.04404e-53	4	BRCA1
6.26379e-56	0.210766	0.672	0.28	1.25276e-52	4	IFI27
1.69976e-55	0.125824	0.901	0.687	3.39951e-52	4	KPNA2
2.66846e-55	0.125402	0.895	0.725	5.33693e-52	4	PQLC1
3.23331e-55	0.156246	0.992	0.843	6.46663e-52	4	JTB
4.11087e-55	0.145344	0.981	0.823	8.22173e-52	4	AK2
5.67048e-55	0.104649	0.987	0.837	1.1341e-51	4	ATAD2
1.90444e-54	0.110482	0.906	0.716	3.80889e-51	4	WDR76
2.22593e-54	0.132899	0.934	0.685	4.45187e-51	4	FKBP11
2.29913e-54	0.152791	1	0.861	4.59825e-51	4	HDGF
7.66928e-54	0.101062	0.764	0.559	1.53386e-50	4	TRIP13
1.00106e-53	0.119141	0.837	0.607	2.00213e-50	4	CDCA4
1.04732e-53	0.109526	0.919	0.772	2.09465e-50	4	NET1
1.19143e-53	0.119927	0.879	0.646	2.38286e-50	4	TSTA3
1.65525e-53	0.110092	0.906	0.784	3.3105e-50	4	HSDL2
4.84011e-53	0.248386	1	0.978	9.68021e-50	4	HSP90AB1
7.38307e-52	0.177526	1	0.949	1.47661e-48	4	CFL1
9.1734e-52	0.114797	1	0.961	1.83468e-48	4	HMGB2
1.17553e-51	0.113591	0.958	0.824	2.35105e-48	4	BMS1
2.15236e-51	0.104924	0.817	0.621	4.30473e-48	4	GALNT6
2.50465e-51	0.123938	0.943	0.73	5.0093e-48	4	SDF2L1
3.82621e-51	0.207413	1	0.986	7.65242e-48	4	NCL
6.48592e-51	0.123459	0.964	0.771	1.29718e-47	4	NFE2L2
1.14161e-50	0.138687	0.662	0.302	2.28322e-47	4	A4GALT
6.64791e-50	0.11962	0.971	0.824	1.32958e-46	4	NAA50
1.08384e-49	0.122404	0.918	0.73	2.16769e-46	4	DUSP23
5.81806e-47	0.111392	0.674	0.329	1.16361e-43	4	HSD3B7
1.01292e-46	0.285876	1	0.964	2.02584e-43	4	RPS5
2.15186e-46	0.264457	1	0.974	4.30372e-43	4	RPL21
6.17857e-46	0.117632	0.73	0.509	1.23571e-42	4	CDCA3
3.06092e-45	0.102573	0.926	0.736	6.12184e-42	4	ITGAE
6.33393e-45	0.128617	0.964	0.837	1.26679e-41	4	PSMD1
5.08568e-44	0.147489	0.68	0.399	1.01714e-40	4	COCH
2.91141e-42	0.107788	0.704	0.539	5.82281e-39	4	CHAC2
1.20952e-41	0.118792	0.937	0.787	2.41903e-38	4	STRAP
2.86834e-41	0.114638	0.942	0.738	5.73667e-38	4	ITM2A
7.55646e-41	0.129694	0.995	0.88	1.51129e-37	4	ANP32E
1.78318e-40	0.197673	0.994	0.883	3.56637e-37	4	SLC25A5
8.84027e-39	0.249754	1	0.982	1.76805e-35	4	RPS27A
1.25682e-38	0.181085	1	0.943	2.51364e-35	4	PFN1
2.45719e-38	0.126116	1	0.909	4.91439e-35	4	DNAJA1
2.92837e-37	0.101069	0.992	0.886	5.85674e-34	4	ATF7IP2
2.78952e-36	0.101079	0.677	0.504	5.57904e-33	4	LEPR
4.82968e-36	0.114983	0.985	0.883	9.65936e-33	4	SMC1A
4.54368e-34	0.24147	1	0.984	9.08736e-31	4	RPS3
1.73131e-33	0.193194	1	0.968	3.46262e-30	4	HIST1H1C
3.8727e-32	0.130251	0.99	0.862	7.7454e-29	4	VDAC1
4.11983e-31	0.216116	1	0.99	8.23966e-28	4	RPL18A
9.00669e-31	0.228219	1	0.985	1.80134e-27	4	HIST1H1D
3.53534e-25	0.19908	1	0.994	7.07067e-22	4	RPS18
8.62391e-25	0.123674	0.987	0.846	1.72478e-21	4	FABP5
3.97382e-24	0.206566	1	0.986	7.94765e-21	4	RPS14
2.57928e-22	0.19115	1	0.987	5.15857e-19	4	RPL41
7.74208e-20	0.171069	1	0.972	1.54842e-16	4	RPL10A
1.56427e-19	0.171738	1	0.991	3.12855e-16	4	RPL3
4.68581e-19	0.189728	1	0.992	9.37163e-16	4	RPL10
1.32277e-17	0.145103	1	0.985	2.64554e-14	4	RPL5
2.24851e-12	0.15963	1	0.985	4.49701e-09	4	RPS12
1.04198e-11	0.145739	1	0.984	2.08396e-08	4	RPL15
1.38414e-09	0.130698	1	0.97	2.76828e-06	4	RPS13
1.38518e-08	0.107372	1	0.962	2.77036e-05	4	RPS26
3.34514e-08	0.110868	1	0.99	6.69029e-05	4	RPS3A
7.15053e-07	0.116161	1	0.986	0.00143011	4	RPL13A
3.05597e-05	0.115585	1	0.994	0.0611194	4	RPLP1
1.42145e-229	0.662859	0.968	0.621	2.84291e-226	5	AL157895.1
1.03336e-174	0.839781	0.994	0.916	2.06672e-171	5	SERPINB1
2.16929e-166	0.574768	0.968	0.78	4.33859e-163	5	PBX1
1.39369e-163	0.712996	0.996	0.915	2.78739e-160	5	RAP1B
1.80143e-162	0.686682	0.976	0.743	3.60286e-159	5	SLC40A1
3.80026e-161	0.662514	0.939	0.604	7.60052e-158	5	FCER1A
2.46865e-143	0.483329	0.974	0.811	4.9373e-140	5	MPP1
1.73572e-130	0.301012	0.919	0.74	3.47143e-127	5	CKB
8.00676e-130	0.591101	0.988	0.868	1.60135e-126	5	DAD1
1.79382e-127	0.547703	0.958	0.737	3.58764e-124	5	GATA2
1.32056e-125	0.515158	0.986	0.855	2.64113e-122	5	LIMS1
1.91739e-123	0.466885	0.976	0.806	3.83477e-120	5	FERMT3
3.16207e-121	0.126653	0.853	0.597	6.32414e-118	5	VWF
2.19652e-120	0.451141	0.941	0.802	4.39303e-117	5	BMP2K
1.69e-113	0.381098	0.891	0.725	3.38e-110	5	C2orf88
3.25612e-113	0.361506	0.873	0.646	6.51223e-110	5	RGS18
1.13353e-111	0.557773	0.978	0.791	2.26707e-108	5	CYTL1
1.42705e-111	0.42392	0.998	0.94	2.85411e-108	5	LDHB
2.46567e-110	0.414864	0.952	0.797	4.93135e-107	5	PLXDC2
2.29906e-108	0.143362	0.879	0.675	4.59811e-105	5	SELP
1.4605e-107	0.443178	0.917	0.68	2.921e-104	5	IL1B
1.86492e-107	0.383742	0.935	0.755	3.72984e-104	5	PKIG
2.80272e-106	0.413455	0.99	0.894	5.60543e-103	5	CD63
2.94231e-106	0.149561	0.871	0.646	5.88463e-103	5	LTBP1
8.79635e-104	0.221761	0.943	0.75	1.75927e-100	5	MYCT1
1.01295e-102	0.827042	0.949	0.801	2.0259e-99	5	PLEK
9.33648e-102	0.450539	0.952	0.807	1.8673e-98	5	CTNNBL1
5.05702e-101	0.536835	0.984	0.882	1.0114e-97	5	EREG
1.37224e-92	0.307894	0.919	0.708	2.74448e-89	5	DTD1
1.55763e-91	0.54692	0.952	0.821	3.11526e-88	5	PRKAR2B
2.6586e-90	0.152043	0.887	0.693	5.3172e-87	5	ARHGEF12
5.56921e-90	0.421912	0.978	0.842	1.11384e-86	5	PDZD8
2.32966e-87	0.428284	0.875	0.65	4.65933e-84	5	PDLIM1
1.34959e-86	0.38687	0.96	0.826	2.69919e-83	5	TPM1
1.36339e-84	0.404786	0.99	0.876	2.72677e-81	5	NAA38
6.34238e-83	0.270071	0.919	0.739	1.26848e-79	5	ITGAE
1.61876e-81	0.376912	0.933	0.801	3.23751e-78	5	HEMGN
1.78221e-81	0.300355	0.917	0.795	3.56442e-78	5	STXBP5
3.29341e-81	0.299853	0.95	0.812	6.58681e-78	5	PSTPIP2
1.0072e-79	0.288823	0.863	0.705	2.01439e-76	5	ABCC4
2.69191e-78	0.139239	0.826	0.506	5.38381e-75	5	P2RX5
1.71626e-75	0.255533	0.838	0.643	3.43251e-72	5	GMPR
1.46481e-71	0.209072	0.899	0.718	2.92962e-68	5	GUCY1B1
1.53287e-71	0.32886	0.887	0.739	3.06575e-68	5	CPA3
3.61354e-71	0.312693	0.903	0.727	7.22708e-68	5	TGFB1
2.33916e-70	0.350847	0.982	0.877	4.67831e-67	5	TPI1
7.62727e-70	0.295258	0.792	0.53	1.52545e-66	5	HPGDS
2.96775e-69	0.387985	1	0.992	5.93549e-66	5	RPL10
1.13155e-68	0.244153	0.901	0.699	2.26311e-65	5	ZNF385D
1.10643e-66	0.305731	0.931	0.768	2.21286e-63	5	KCNQ1OT1
1.71457e-66	0.445326	0.832	0.58	3.42914e-63	5	ITGA2B
2.04028e-66	0.236245	0.97	0.842	4.08056e-63	5	MMRN1
1.49036e-65	0.198286	0.863	0.69	2.98072e-62	5	STON2
3.29791e-65	0.398126	0.976	0.918	6.59583e-62	5	CD69
6.2616e-65	0.137085	0.838	0.66	1.25232e-61	5	ST6GAL2
6.31431e-65	0.380192	1	0.972	1.26286e-61	5	RPL10A
6.14838e-64	0.172652	0.79	0.589	1.22968e-60	5	PTGS1
8.93584e-64	0.34546	1	0.984	1.78717e-60	5	RPL15
2.18877e-63	0.264823	0.883	0.679	4.37753e-60	5	FADS1
8.23206e-62	0.267938	0.939	0.783	1.64641e-58	5	HIST3H2A
1.55763e-61	0.118371	0.824	0.626	3.11526e-58	5	FBN1
7.84953e-61	0.19655	0.915	0.658	1.56991e-57	5	CLU
2.82303e-60	0.23642	0.897	0.734	5.64605e-57	5	DUSP23
2.78125e-58	0.193872	0.83	0.503	5.56249e-55	5	GATA1
1.44225e-57	0.150942	0.877	0.696	2.88449e-54	5	ABCC5
3.39396e-57	0.147959	0.923	0.764	6.78791e-54	5	PRKG2
1.01573e-56	0.297021	0.998	0.924	2.03146e-53	5	S100A4
2.44777e-56	0.236711	0.937	0.782	4.89553e-53	5	TIMP1
7.33103e-56	0.341481	1	0.985	1.46621e-52	5	RPS4X
8.55662e-56	0.235431	0.935	0.823	1.71132e-52	5	SOS1
1.61407e-55	0.166588	0.772	0.486	3.22814e-52	5	TMEM246
2.30883e-55	0.164654	0.749	0.522	4.61766e-52	5	MYCN
5.38467e-54	0.236489	0.976	0.828	1.07693e-50	5	SLC39A3
7.97875e-54	0.305434	1	0.984	1.59575e-50	5	HIST1H1E
8.27571e-54	0.223543	0.834	0.68	1.65514e-50	5	MINPP1
1.57899e-52	0.302624	1	0.985	3.15798e-49	5	RPL5
4.41672e-52	0.285165	1	0.968	8.83344e-49	5	FTL
1.5055e-51	0.223646	0.966	0.858	3.011e-48	5	SRI
1.55329e-51	0.314492	1	0.984	3.10658e-48	5	RPL7A
2.53822e-51	0.229791	0.994	0.937	5.07643e-48	5	HIST2H2AC
1.68056e-50	0.296391	0.978	0.888	3.36113e-47	5	TFRC
2.51116e-50	0.214096	0.863	0.74	5.02232e-47	5	ZFPM1
3.53573e-50	0.28886	1	0.99	7.07146e-47	5	RPL18A
3.62268e-50	0.18978	0.895	0.763	7.24536e-47	5	MYH10
4.35358e-50	0.252844	0.939	0.767	8.70717e-47	5	MARCKSL1
6.49822e-50	0.299744	1	0.986	1.29964e-46	5	RPL13A
1.27054e-49	0.2742	1	0.979	2.54108e-46	5	HSP90AB1
1.37419e-49	0.29248	1	0.983	2.74838e-46	5	FTH1
2.05602e-49	0.200515	0.889	0.756	4.11204e-46	5	PARVB
4.3485e-49	0.216815	0.873	0.721	8.697e-46	5	CMAS
2.22029e-48	0.217056	0.891	0.712	4.44059e-45	5	LXN
3.9443e-48	0.303533	1	0.994	7.8886e-45	5	RPS2
6.22589e-48	0.210243	0.935	0.781	1.24518e-44	5	ANGPT1
2.16062e-46	0.245517	0.964	0.866	4.32123e-43	5	VDAC1
2.20145e-46	0.30243	1	0.97	4.40291e-43	5	RPS13
1.07969e-45	0.153112	0.848	0.689	2.15938e-42	5	TAL1
1.29689e-45	0.167399	0.873	0.648	2.59378e-42	5	FADS2
2.92637e-45	0.30406	1	0.967	5.85274e-42	5	EEF1B2
1.0685e-44	0.167586	0.836	0.616	2.13699e-41	5	MGAT4B
1.14102e-44	0.211402	0.822	0.714	2.28204e-41	5	CPPED1
1.10657e-43	0.266332	1	0.98	2.21314e-40	5	RPSA
7.26309e-43	0.236908	0.701	0.548	1.45262e-39	5	TIMP3
1.06881e-42	0.207587	0.713	0.447	2.13762e-39	5	MPIG6B
7.75226e-42	0.279445	1	0.986	1.55045e-38	5	RPS14
1.60465e-41	0.216285	0.927	0.745	3.20929e-38	5	CYTOR
2.15298e-41	0.296856	1	0.99	4.30597e-38	5	RPS3A
3.21973e-41	0.163358	0.937	0.801	6.43946e-38	5	MIR4435-2HG
7.92221e-41	0.175728	0.869	0.708	1.58444e-37	5	SLC44A1
8.05466e-41	0.161733	0.774	0.533	1.61093e-37	5	ICAM4
1.12711e-40	0.267423	1	0.987	2.25422e-37	5	RPL41
3.71844e-40	0.164016	0.939	0.786	7.43688e-37	5	PCMT1
7.87306e-40	0.301042	1	0.964	1.57461e-36	5	RPS5
8.45537e-40	0.260014	0.986	0.885	1.69107e-36	5	SLC25A5
2.21825e-39	0.1925	0.958	0.824	4.43651e-36	5	MRPL52
2.23421e-39	0.219258	0.774	0.55	4.46843e-36	5	CNRIP1
3.55203e-38	0.209694	0.82	0.687	7.10405e-35	5	PIM1
5.25509e-38	0.164705	0.867	0.717	1.05102e-34	5	PITHD1
8.28274e-38	0.181357	0.952	0.848	1.65655e-34	5	ALDH1A1
9.17666e-38	0.111676	0.808	0.536	1.83533e-34	5	KLF1
3.26773e-37	0.165437	0.624	0.266	6.53545e-34	5	STXBP6
8.97999e-37	0.279934	1	0.985	1.796e-33	5	RPS3
1.81778e-36	0.134195	0.733	0.521	3.63555e-33	5	DLC1
2.46313e-36	0.174325	0.802	0.681	4.92626e-33	5	NRGN
1.30959e-35	0.122867	0.812	0.649	2.61918e-32	5	BCL2L1
3.34151e-35	0.173497	0.869	0.765	6.68302e-32	5	VCL
3.38775e-35	0.25168	1	0.991	6.7755e-32	5	RPL3
5.74512e-35	0.144716	0.941	0.833	1.14902e-31	5	SERPINE2
7.89456e-35	0.117548	0.648	0.406	1.57891e-31	5	ADRA2A
9.27728e-35	0.242165	0.998	0.969	1.85546e-31	5	HIST1H1C
2.6507e-34	0.161652	0.929	0.793	5.30141e-31	5	DECR1
6.51916e-34	0.185716	0.952	0.856	1.30383e-30	5	GTF3C6
4.57275e-33	0.1592	0.947	0.848	9.14551e-30	5	UQCRFS1
7.0222e-33	0.168038	0.919	0.772	1.40444e-29	5	GCSH
1.4301e-32	0.171531	0.972	0.889	2.8602e-29	5	ATF7IP2
2.25941e-32	0.154074	0.954	0.851	4.51883e-29	5	TXNL1
4.32405e-32	0.133437	0.861	0.711	8.64809e-29	5	PPID
8.94498e-32	0.24644	1	0.994	1.789e-28	5	RPS18
1.35667e-31	0.265815	1	0.982	2.71333e-28	5	RPS27A
3.64698e-31	0.117638	0.764	0.597	7.29396e-28	5	FHL2
5.4552e-31	0.161626	0.954	0.83	1.09104e-27	5	PSMD8
6.96131e-31	0.141561	0.816	0.662	1.39226e-27	5	CSF2RB
1.31004e-30	0.147656	0.919	0.791	2.62008e-27	5	STRAP
1.8443e-30	0.143779	0.962	0.839	3.68861e-27	5	NDUFB6
5.25099e-30	0.11803	0.933	0.792	1.0502e-26	5	PGRMC2
9.9048e-30	0.131988	0.836	0.693	1.98096e-26	5	POLR3K
3.0753e-29	0.122298	0.626	0.42	6.15059e-26	5	ITPKA
3.83551e-29	0.263772	0.798	0.73	7.67103e-26	5	AC011139.1
4.67817e-29	0.155436	0.947	0.844	9.35635e-26	5	NDUFB9
5.0495e-29	0.1339	0.952	0.828	1.0099e-25	5	PSMB6
1.6346e-28	0.183059	0.81	0.648	3.2692e-25	5	PPIF
3.96895e-28	0.176769	0.966	0.881	7.9379e-25	5	EMP3
8.05278e-28	0.146406	0.745	0.598	1.61056e-24	5	LTC4S
9.20279e-28	0.171883	0.939	0.837	1.84056e-24	5	ADI1
9.73595e-28	0.215481	1	0.963	1.94719e-24	5	RPS26
9.8365e-28	0.155943	0.941	0.848	1.9673e-24	5	CD82
1.00847e-27	0.173103	0.986	0.914	2.01693e-24	5	SOD1
1.1312e-27	0.105604	0.784	0.64	2.2624e-24	5	RAC3
2.18011e-27	0.17396	0.982	0.91	4.36021e-24	5	SNRPE
2.70669e-27	0.137051	0.992	0.919	5.41337e-24	5	TSC22D1
2.80041e-27	0.144309	0.85	0.708	5.60082e-24	5	RPA2
1.63107e-26	0.148171	0.968	0.865	3.26215e-23	5	PRELID1
2.13751e-26	0.200358	1	0.977	4.27502e-23	5	RPS16
3.25696e-26	0.129301	0.968	0.847	6.51392e-23	5	JTB
6.08812e-26	0.133762	0.699	0.607	1.21762e-22	5	AOAH
7.41563e-26	0.199112	0.988	0.92	1.48313e-22	5	LDHA
1.06689e-25	0.141247	0.935	0.836	2.13377e-22	5	FDPS
1.2809e-25	0.117723	0.863	0.73	2.56181e-22	5	MRPS23
1.41437e-25	0.127093	0.949	0.826	2.82873e-22	5	CREG1
1.48512e-25	0.185577	0.994	0.944	2.97023e-22	5	PFN1
1.81604e-25	0.129534	0.836	0.739	3.63208e-22	5	CCDC28B
2.76363e-25	0.103492	0.945	0.86	5.52726e-22	5	HIST1H2AH
5.16808e-25	0.217032	1	0.975	1.03362e-21	5	RPL21
6.07811e-25	0.117137	0.836	0.737	1.21562e-21	5	CAVIN1
1.23814e-24	0.109343	0.883	0.831	2.47628e-21	5	PLXNC1
2.37246e-24	0.134633	0.919	0.812	4.74491e-21	5	VBP1
3.1859e-24	0.10007	0.899	0.748	6.37179e-21	5	GLRX3
1.16095e-23	0.110861	0.725	0.614	2.32191e-20	5	DBN1
1.1126e-22	0.137683	0.897	0.778	2.22519e-19	5	UROD
1.2893e-22	0.117164	0.865	0.701	2.57861e-19	5	DAAM1
1.38167e-22	0.223869	1	0.985	2.76335e-19	5	RPS12
1.55382e-22	0.124558	0.974	0.862	3.10765e-19	5	GTF2A2
1.82797e-22	0.167477	0.994	0.91	3.65594e-19	5	EIF5A
3.95948e-22	0.145472	0.954	0.866	7.91896e-19	5	PRMT1
4.59938e-22	0.172381	0.996	0.931	9.19877e-19	5	TXN
5.35816e-22	0.138745	0.998	0.971	1.07163e-18	5	ACTG1
7.6559e-22	0.128653	0.972	0.883	1.53118e-18	5	LSM3
8.52409e-22	0.141102	0.877	0.79	1.70482e-18	5	PSMG1
8.68901e-22	0.137942	0.988	0.943	1.7378e-18	5	SSB
1.93807e-21	0.17139	1	0.987	3.87614e-18	5	RPL14
2.07733e-21	0.141723	0.838	0.737	4.15466e-18	5	DCTPP1
3.00032e-21	0.154222	0.958	0.874	6.00064e-18	5	TUBA1A
8.0631e-21	0.118307	0.935	0.831	1.61262e-17	5	MDH2
1.01009e-20	0.160461	1	0.997	2.02018e-17	5	EEF1A1
1.34082e-20	0.115866	0.901	0.781	2.68164e-17	5	DNPH1
1.47454e-20	0.171399	1	0.924	2.94907e-17	5	CHCHD2
1.51334e-20	0.121598	0.909	0.792	3.02669e-17	5	TUBA1C
2.52647e-20	0.154828	0.915	0.824	5.05294e-17	5	PSMC3
2.86945e-20	0.165373	1	0.982	5.73891e-17	5	NPM1
6.72554e-20	0.104414	0.869	0.74	1.34511e-16	5	PGAM1
8.66447e-20	0.125998	0.966	0.87	1.73289e-16	5	TUFM
1.90879e-19	0.124684	0.988	0.897	3.81758e-16	5	APRT
5.45958e-19	0.143915	0.982	0.899	1.09192e-15	5	C1QBP
7.28864e-19	0.139006	0.992	0.91	1.45773e-15	5	PSMA7
9.52012e-19	0.102392	0.943	0.827	1.90402e-15	5	VDAC3
1.73558e-18	0.115488	0.931	0.824	3.47116e-15	5	SLIRP
1.91535e-18	0.122895	0.954	0.873	3.8307e-15	5	GSPT1
2.13349e-18	0.105994	0.851	0.759	4.26698e-15	5	PRDX4
2.9697e-18	0.12928	0.988	0.91	5.93941e-15	5	ATP5MC3
3.34972e-18	0.143116	0.954	0.875	6.69943e-15	5	PPM1G
5.00704e-18	0.106105	0.982	0.875	1.00141e-14	5	GADD45GIP1
6.08766e-18	0.112573	0.943	0.877	1.21753e-14	5	PDAP1
7.46276e-18	0.104658	0.966	0.856	1.49255e-14	5	TIMM13
8.52717e-18	0.139579	0.976	0.889	1.70543e-14	5	PSMA4
1.15153e-17	0.141942	0.99	0.908	2.30305e-14	5	ELOB
1.33153e-17	0.124238	0.699	0.604	2.66307e-14	5	SLC27A2
1.52248e-17	0.101775	0.907	0.819	3.04495e-14	5	BAG1
1.77053e-17	0.120571	0.939	0.835	3.54106e-14	5	ANAPC11
4.95131e-17	0.137958	0.952	0.857	9.90261e-14	5	NME1
7.0853e-17	0.102521	0.842	0.748	1.41706e-13	5	AK6
7.50076e-17	0.132766	0.925	0.828	1.50015e-13	5	SRM
8.54576e-17	0.110975	0.867	0.74	1.70915e-13	5	PXMP2
3.76414e-16	0.149329	0.958	0.88	7.52828e-13	5	NDUFB2
6.75185e-16	0.151883	0.899	0.857	1.35037e-12	5	DNAJC9
4.21593e-15	0.101701	0.98	0.885	8.43186e-12	5	COX5A
6.67099e-15	0.122466	1	0.974	1.3342e-11	5	RPL4
7.79908e-15	0.113189	0.986	0.923	1.55982e-11	5	DYNLL1
8.31277e-15	0.15281	1	0.972	1.66255e-11	5	YBX1
1.07009e-14	0.117061	0.998	0.937	2.14019e-11	5	NDUFS5
1.50924e-13	0.128985	0.899	0.802	3.01848e-10	5	CDK4
5.01115e-13	0.105838	0.962	0.876	1.00223e-09	5	PAICS
5.54756e-13	0.129829	0.992	0.941	1.10951e-09	5	GSTP1
6.88126e-13	0.11589	0.98	0.894	1.37625e-09	5	PARK7
8.63119e-13	0.101285	1	0.947	1.72624e-09	5	UBB
2.22854e-12	0.108954	0.754	0.661	4.45707e-09	5	TMEM106C
2.45394e-12	0.162129	0.707	0.69	4.90788e-09	5	FAM19A2
5.12082e-12	0.152203	1	0.994	1.02416e-08	5	RPLP1
2.07683e-11	0.125189	0.976	0.893	4.15366e-08	5	PDIA6
4.90527e-11	0.121185	0.943	0.851	9.81054e-08	5	FABP5
2.66158e-10	0.12324	1	0.981	5.32316e-07	5	RPL8
2.24422e-08	0.117652	1	0.975	4.48844e-05	5	RPL23
7.22346e-05	0.112218	0.81	0.727	0.144469	5	TK1
0.00286872	0.107789	0.434	0.495	1	5	PF4
4.24881e-281	2.71131	1	0.615	8.49762e-278	6	MPO
2.25171e-275	2.64688	0.998	0.67	4.50342e-272	6	AZU1
2.31433e-272	2.74154	0.994	0.648	4.62866e-269	6	ELANE
3.94015e-262	2.37559	0.988	0.643	7.88029e-259	6	PRTN3
1.33642e-251	1.33955	1	0.934	2.67284e-248	6	CALR
5.62164e-242	1.26872	0.988	0.501	1.12433e-238	6	RNASE2
6.70461e-231	1.30522	0.965	0.572	1.34092e-227	6	CTSG
8.4031e-225	0.869914	0.963	0.645	1.68062e-221	6	HGF
1.64156e-213	0.626312	0.965	0.724	3.28313e-210	6	KBTBD11
4.07826e-213	0.830643	0.942	0.672	8.15652e-210	6	PLPPR3
6.34201e-199	0.494184	0.952	0.764	1.2684e-195	6	RGCC
4.47062e-194	0.855248	0.996	0.807	8.94125e-191	6	CSF3R
5.15646e-194	0.551844	0.957	0.594	1.03129e-190	6	CLEC12A
9.30733e-194	0.740057	0.907	0.467	1.86147e-190	6	RNASE3
6.75215e-192	0.685305	0.963	0.721	1.35043e-188	6	FNDC3B
1.2418e-189	0.583729	0.934	0.575	2.4836e-186	6	MS4A3
1.00882e-184	1.18241	0.996	0.933	2.01764e-181	6	SRGN
2.10994e-182	0.551376	0.971	0.726	4.21989e-179	6	CITED4
1.2972e-175	0.762968	0.986	0.858	2.59441e-172	6	P4HB
7.29889e-175	0.871991	0.998	0.937	1.45978e-171	6	ANXA1
4.72447e-172	0.797549	1	0.962	9.44893e-169	6	HSP90B1
2.03439e-168	0.423805	0.886	0.562	4.06878e-165	6	SERPINB10
5.89879e-168	0.653574	0.942	0.729	1.17976e-164	6	LYST
8.92419e-166	0.436005	0.888	0.429	1.78484e-162	6	MNDA
2.21232e-162	0.718647	0.88	0.478	4.42464e-159	6	CST7
6.16893e-162	0.660955	0.967	0.735	1.23379e-158	6	CPA3
3.4056e-154	0.80514	0.913	0.686	6.81119e-151	6	CFD
3.27309e-152	0.190892	0.901	0.679	6.54617e-149	6	AC020656.1
4.41832e-147	0.267182	0.853	0.362	8.83664e-144	6	F13A1
2.74417e-144	0.260713	0.826	0.293	5.48834e-141	6	HOMER3
1.90533e-140	0.853587	0.959	0.802	3.81066e-137	6	CLEC11A
1.23848e-138	0.703074	0.994	0.942	2.47695e-135	6	HSPA5
1.88102e-137	0.347701	0.905	0.765	3.76203e-134	6	MARCKS
4.06444e-134	0.797268	0.992	0.882	8.12888e-131	6	EREG
1.07118e-133	0.578808	0.996	0.894	2.14236e-130	6	PLAC8
2.24075e-130	0.382798	0.845	0.505	4.48151e-127	6	CSTA
3.42283e-125	0.255152	0.892	0.541	6.84567e-122	6	LYZ
1.2773e-124	0.540335	0.975	0.813	2.55459e-121	6	RFLNB
1.76041e-122	0.141889	0.789	0.399	3.52081e-119	6	CLEC5A
3.98433e-122	0.239018	0.913	0.648	7.96866e-119	6	CLDN10
8.27676e-118	0.199912	0.917	0.712	1.65535e-114	6	PLAUR
2.71422e-116	0.140507	0.832	0.594	5.42844e-113	6	UGT3A2
3.20107e-113	0.478991	0.948	0.715	6.40213e-110	6	TNFSF13B
7.88041e-113	0.362602	0.969	0.863	1.57608e-109	6	IRS2
1.06822e-112	0.370436	0.946	0.708	2.13644e-109	6	FAM107B
1.35215e-111	0.486106	1	0.946	2.7043e-108	6	EIF3A
3.37831e-110	0.65904	0.946	0.658	6.75662e-107	6	C1QTNF4
1.30736e-108	0.503879	0.998	0.929	2.61473e-105	6	PPIB
3.12122e-104	0.403156	0.867	0.618	6.24243e-101	6	TSPOAP1
1.79785e-103	0.568559	0.998	0.916	3.5957e-100	6	SERPINB1
2.23123e-102	0.370855	0.94	0.791	4.46246e-99	6	HYOU1
3.85803e-102	0.557775	0.986	0.901	7.71606e-99	6	SAT1
4.1292e-101	0.498159	0.95	0.792	8.2584e-98	6	MGST1
4.43403e-101	0.573812	0.994	0.935	8.86806e-98	6	FOS
2.06551e-100	0.325741	0.973	0.861	4.13101e-97	6	DUSP6
2.72429e-100	0.4942	0.901	0.751	5.44859e-97	6	TENT5A
1.79262e-99	0.48619	0.861	0.542	3.58525e-96	6	CEBPA
3.00616e-99	0.270047	0.938	0.786	6.01232e-96	6	PTPRE
5.61517e-99	0.171418	0.905	0.624	1.12303e-95	6	SERPINB8
2.0316e-97	0.504936	0.836	0.646	4.0632e-94	6	CEBPD
7.74878e-92	0.492263	0.977	0.842	1.54976e-88	6	IGLL1
1.37212e-89	0.295204	0.747	0.368	2.74423e-86	6	ANKRD18A
2.56618e-89	0.451637	0.894	0.645	5.13236e-86	6	NPW
1.29037e-87	0.26951	0.946	0.737	2.58074e-84	6	BAHCC1
1.12876e-86	0.342308	0.988	0.799	2.25751e-83	6	PLEK
5.25436e-85	0.370483	0.807	0.486	1.05087e-81	6	IGFBP2
2.08308e-82	0.413406	0.928	0.814	4.16617e-79	6	PDIA4
7.09559e-81	0.425705	0.998	0.95	1.41912e-77	6	ENO1
3.23414e-80	0.357173	0.857	0.58	6.46827e-77	6	PRAM1
2.20299e-78	0.386516	0.901	0.72	4.40598e-75	6	RAB32
8.25701e-78	0.246393	0.776	0.51	1.6514e-74	6	SUCNR1
1.58135e-76	0.117616	0.822	0.471	3.16269e-73	6	AK4
9.76101e-75	0.278444	0.971	0.903	1.9522e-71	6	AHNAK
3.73634e-73	0.135177	0.81	0.612	7.47268e-70	6	TUBB6
9.6446e-73	0.117177	0.843	0.607	1.92892e-69	6	PLD1
2.80663e-69	0.198442	0.963	0.884	5.61325e-66	6	TNFAIP3
1.06326e-68	0.19851	0.741	0.511	2.12653e-65	6	2021-03-01
4.14369e-65	0.334761	0.99	0.95	8.28739e-62	6	KLF6
1.52144e-62	0.340835	0.994	0.95	3.04287e-59	6	DDX21
1.57406e-62	0.245394	0.983	0.876	3.14812e-59	6	FOSB
1.79168e-61	0.341501	0.954	0.795	3.58336e-58	6	SMIM24
1.44119e-59	0.243156	0.911	0.792	2.88237e-56	6	MXD1
5.46608e-58	0.259936	1	0.996	1.09322e-54	6	PTMA
6.16618e-58	0.351058	0.876	0.739	1.23324e-54	6	SDF2L1
2.67434e-57	0.163818	0.793	0.678	5.34868e-54	6	ANPEP
5.84433e-57	0.19332	0.795	0.554	1.16887e-53	6	NKG7
2.6267e-56	0.286499	0.872	0.673	5.2534e-53	6	FAM45A
7.80835e-55	0.170626	0.828	0.645	1.56167e-51	6	ADA2
1.74534e-54	0.100296	0.886	0.668	3.49068e-51	6	GABPB2
6.02587e-54	0.246843	0.836	0.655	1.20517e-50	6	AGTRAP
2.57066e-53	0.330309	0.954	0.801	5.14132e-50	6	PKM
1.92263e-52	0.257048	0.944	0.832	3.84525e-49	6	RREB1
3.86424e-52	0.274111	1	0.978	7.72847e-49	6	GAPDH
2.86868e-51	0.191879	0.822	0.609	5.73736e-48	6	SPARC
8.33635e-51	0.187308	0.801	0.542	1.66727e-47	6	NAALADL1
6.20833e-50	0.17096	0.679	0.477	1.24167e-46	6	CEBPE
5.98827e-48	0.251904	0.952	0.842	1.19765e-44	6	CITED2
6.75006e-47	0.116443	0.915	0.73	1.35001e-43	6	MAPKAPK2
6.03156e-46	0.127047	0.917	0.746	1.20631e-42	6	TIMM44
4.21481e-45	0.2388	0.944	0.778	8.42962e-42	6	RUVBL2
3.10599e-40	0.148132	0.915	0.785	6.21197e-37	6	CTNNAL1
3.92698e-40	0.213403	0.932	0.797	7.85395e-37	6	UGGT1
7.62099e-40	0.17202	0.799	0.639	1.5242e-36	6	IL6R
1.96751e-38	0.148762	0.793	0.596	3.93501e-35	6	CPVL
3.42727e-38	0.292004	0.961	0.894	6.85454e-35	6	PDIA6
6.66643e-38	0.106314	0.923	0.725	1.33329e-34	6	CBX4
2.31662e-37	0.287319	0.82	0.697	4.63324e-34	6	FKBP11
1.98425e-36	0.100045	0.656	0.362	3.9685e-33	6	TRH
3.74284e-36	0.127533	0.83	0.604	7.48569e-33	6	MID1IP1
2.17846e-35	0.188964	0.687	0.479	4.35692e-32	6	C16orf74
2.26574e-35	0.17733	0.874	0.715	4.53147e-32	6	CRELD2
2.97789e-34	0.224112	0.965	0.858	5.95577e-31	6	IER2
1.30727e-33	0.181299	0.797	0.626	2.61454e-30	6	KIAA0930
7.61836e-33	0.150873	0.872	0.676	1.52367e-29	6	RCC1
6.52829e-32	0.118118	0.814	0.627	1.30566e-28	6	CXorf21
2.25318e-31	0.122031	0.861	0.706	4.50637e-28	6	MYBBP1A
2.95929e-31	0.117205	0.996	0.967	5.91858e-28	6	TSC22D3
4.3805e-31	0.224184	0.996	0.917	8.761e-28	6	GYPC
5.7193e-31	0.199905	0.938	0.828	1.14386e-27	6	AK2
3.32687e-30	0.165052	0.824	0.642	6.65375e-27	6	COTL1
7.89593e-30	0.221826	0.952	0.85	1.57919e-26	6	POLE3
4.45215e-29	0.218893	0.896	0.774	8.9043e-26	6	UQCRC1
3.81932e-28	0.166757	0.963	0.882	7.63865e-25	6	SAP30
1.2847e-27	0.114358	0.983	0.913	2.5694e-24	6	CYBA
7.44392e-27	0.182726	0.963	0.884	1.48878e-23	6	EIF4G1
2.86352e-26	0.129278	0.925	0.781	5.72704e-23	6	ACAT1
5.21197e-26	0.153419	0.967	0.92	1.04239e-22	6	SEC61B
2.18705e-23	0.171326	0.89	0.831	4.37409e-20	6	MYDGF
3.31045e-21	0.159573	0.959	0.865	6.6209e-18	6	NOLC1
4.11796e-20	0.131532	0.861	0.756	8.23593e-17	6	SLC26A2
1.08066e-19	0.102206	0.847	0.762	2.16131e-16	6	FOSL2
3.98221e-19	0.151758	0.957	0.865	7.96441e-16	6	PSMB3
1.49665e-18	0.152323	0.851	0.755	2.9933e-15	6	MANF
5.4841e-18	0.114357	0.776	0.65	1.09682e-14	6	PES1
1.41846e-17	0.136808	0.745	0.645	2.83692e-14	6	SPNS3
1.71275e-15	0.149293	0.944	0.868	3.4255e-12	6	HDGF
5.46804e-14	0.13785	0.963	0.879	1.09361e-10	6	NAA38
9.7862e-14	0.135305	0.948	0.857	1.95724e-10	6	IDH2
1.02411e-13	0.138818	1	0.964	2.04821e-10	6	PPIA
5.07157e-13	0.139778	0.992	0.937	1.01431e-09	6	NDUFS5
1.65251e-12	0.102975	0.845	0.739	3.30501e-09	6	ZNF593
9.46307e-12	0.12207	0.965	0.872	1.89261e-08	6	WDR43
1.03773e-11	0.128246	0.948	0.894	2.07545e-08	6	COX7B
4.08609e-11	0.114294	0.899	0.827	8.17219e-08	6	UQCC2
5.4227e-11	0.127985	0.865	0.82	1.08454e-07	6	EIF4EBP1
1.45327e-09	0.128043	0.718	0.611	2.90654e-06	6	LRRC75A
1.85573e-09	0.12685	1	0.987	3.71146e-06	6	NCL
8.46849e-09	0.120791	0.977	0.918	1.6937e-05	6	RPL22L1
0.00023404	0.262356	0.524	0.421	0.46808	6	AL355922.1
8.03592e-209	0.740748	0.998	0.921	1.60718e-205	7	PDCD4
4.24491e-206	0.229394	0.97	0.477	8.48981e-203	7	UCA1
1.83877e-204	0.744778	0.994	0.525	3.67753e-201	7	KLF1
3.3318e-203	0.493561	0.985	0.709	6.6636e-200	7	CSF1
2.13101e-202	0.771874	0.998	0.852	4.26202e-199	7	TMEM14C
3.05549e-201	0.748204	0.989	0.822	6.11097e-198	7	PLIN2
3.56895e-198	0.682356	0.973	0.539	7.1379e-195	7	CNRIP1
1.50307e-197	0.777122	0.992	0.819	3.00614e-194	7	PRKAR2B
1.56432e-197	0.701987	1	0.865	3.12864e-194	7	MPC2
8.14693e-197	0.412013	0.987	0.773	1.62939e-193	7	MTSS1
6.18377e-196	0.616943	0.996	0.762	1.23675e-192	7	ACSM3
3.31534e-194	0.720228	0.989	0.571	6.63067e-191	7	ITGA2B
8.17646e-194	1.04594	0.994	0.573	1.63529e-190	7	APOC1
1.03448e-191	0.702009	0.983	0.702	2.06897e-188	7	CD36
8.66294e-190	0.324131	0.97	0.73	1.73259e-186	7	RYR3
1.64923e-186	0.683885	0.994	0.824	3.29846e-183	7	TPM1
1.02064e-185	0.839477	1	0.924	2.04128e-182	7	S100A4
1.22602e-184	0.447818	0.958	0.596	2.45204e-181	7	TRIB2
1.97188e-182	0.173403	0.92	0.587	3.94375e-179	7	CTSL
2.79144e-182	0.735669	0.998	0.721	5.58288e-179	7	BLVRB
2.40082e-179	0.903268	0.987	0.694	4.80164e-176	7	MYC
3.2173e-179	0.691328	0.989	0.764	6.4346e-176	7	CASP3
1.41596e-176	0.930183	1	0.895	2.83192e-173	7	S100A6
2.50649e-176	0.713367	0.998	0.841	5.01298e-173	7	PDZD8
2.06514e-175	0.53743	0.983	0.619	4.13028e-172	7	PVT1
3.16993e-175	0.450645	1	0.974	6.33985e-172	7	RPL4
4.45922e-173	0.335729	0.964	0.623	8.91843e-170	7	AL157895.1
7.3438e-173	0.634977	0.994	0.741	1.46876e-169	7	CYTOR
1.24468e-172	0.570367	0.994	0.798	2.48935e-169	7	MIR4435-2HG
1.26964e-172	0.520907	0.973	0.684	2.53928e-169	7	EPSTI1
4.58372e-172	0.271472	0.962	0.695	9.16745e-169	7	SEMA3C
2.11644e-170	0.585212	0.966	0.635	4.23288e-167	7	APOE
1.36819e-169	0.303429	0.89	0.51	2.73639e-166	7	PCAT18
5.49066e-168	0.472416	1	0.982	1.09813e-164	7	NPM1
3.91241e-166	0.628749	0.992	0.743	7.82482e-163	7	SLC40A1
6.88009e-166	0.431086	1	0.987	1.37602e-162	7	RPL14
1.83703e-165	0.492732	0.949	0.539	3.67405e-162	7	PPP1R14A
2.44337e-164	0.104614	0.943	0.622	4.88673e-161	7	SLC10A4
2.66443e-164	0.329524	0.979	0.753	5.32887e-161	7	NEDD4L
6.45264e-161	0.508565	0.983	0.713	1.29053e-157	7	MPST
3.77219e-160	0.514308	0.977	0.566	7.54438e-157	7	TFR2
5.56648e-160	0.419227	0.926	0.647	1.1133e-156	7	NECAB1
2.02967e-155	0.5376	0.994	0.805	4.05933e-152	7	CTNNBL1
5.58463e-153	0.513459	0.992	0.855	1.11693e-149	7	PHF6
9.21139e-153	0.54853	0.994	0.785	1.84228e-149	7	REXO2
1.13495e-152	0.457713	0.966	0.57	2.26989e-149	7	ANK1
2.92442e-149	0.531793	0.989	0.773	5.84883e-146	7	UROD
1.25944e-147	0.576833	0.998	0.879	2.51887e-144	7	EMP3
1.55491e-146	0.524328	1	0.972	3.10981e-143	7	YBX1
1.21187e-145	0.125101	0.918	0.562	2.42375e-142	7	SLC11A1
5.87605e-145	0.391431	0.964	0.637	1.17521e-141	7	SMIM1
4.51908e-142	0.458374	1	0.979	9.03816e-139	7	HSP90AB1
5.10989e-142	0.571538	1	0.967	1.02198e-138	7	EEF1B2
7.76056e-141	0.472214	0.958	0.709	1.55211e-137	7	LXN
1.07946e-140	0.403884	0.958	0.496	2.15893e-137	7	GATA1
2.15519e-140	0.454029	0.97	0.758	4.31037e-137	7	CMBL
5.42886e-139	0.428045	0.985	0.831	1.08577e-135	7	SERPINE2
1.73641e-138	0.152591	0.852	0.416	3.47283e-135	7	CD40LG
7.4653e-138	0.221214	0.977	0.83	1.49306e-134	7	TP53INP1
3.21053e-137	0.146344	0.937	0.669	6.42107e-134	7	LINC00891
4.8198e-137	0.516523	0.962	0.678	9.6396e-134	7	IL1B
8.53709e-137	0.503566	0.987	0.765	1.70742e-133	7	MARCKSL1
9.55726e-137	0.453212	0.962	0.74	1.91145e-133	7	SMIM10
6.98484e-136	0.393135	0.928	0.605	1.39697e-132	7	TST
1.39759e-133	0.430695	1	0.977	2.79518e-130	7	RPS16
3.44691e-133	0.351997	0.983	0.752	6.89382e-130	7	PKIG
1.22096e-130	0.362078	0.945	0.657	2.44191e-127	7	FAM89A
7.28542e-130	0.228095	0.882	0.488	1.45708e-126	7	SPTBN2
5.28083e-129	0.13636	0.922	0.679	1.05617e-125	7	AC002467.1
1.00534e-128	0.371889	0.907	0.589	2.01069e-125	7	FHL2
2.71213e-128	0.418376	0.981	0.776	5.42426e-125	7	HDAC7
7.01095e-128	0.17247	0.878	0.563	1.40219e-124	7	SLC14A1
4.49566e-127	0.31797	0.983	0.78	8.99133e-124	7	HIST3H2A
1.0285e-126	0.424858	0.977	0.73	2.057e-123	7	LYAR
2.13768e-125	0.365909	0.96	0.742	4.27536e-122	7	CCDC112
7.28404e-125	0.152124	0.899	0.528	1.45681e-121	7	MFSD2B
9.09373e-125	0.392438	0.994	0.849	1.81875e-121	7	TXNL1
1.52474e-124	0.447499	0.996	0.827	3.04948e-121	7	SLC39A3
1.55681e-124	0.343304	0.966	0.706	3.11362e-121	7	LDB1
3.91934e-123	0.457	1	0.98	7.83869e-120	7	RPSA
1.61104e-122	0.434805	1	0.898	3.22208e-119	7	C1QBP
3.36124e-122	0.423773	0.987	0.829	6.72248e-119	7	NFIA
3.7353e-120	0.358597	0.966	0.645	7.4706e-117	7	PDLIM1
2.13323e-119	0.399568	0.985	0.846	4.26646e-116	7	FBXO7
5.16903e-119	0.120473	0.833	0.378	1.03381e-115	7	ST6GALNAC1
1.09188e-118	0.460156	1	0.994	2.18376e-115	7	RPS2
1.01448e-117	0.231478	0.873	0.517	2.02895e-114	7	MICAL2
5.49406e-117	0.399498	0.956	0.747	1.09881e-113	7	ZFP36L1
2.88113e-115	0.430863	1	0.981	5.76226e-112	7	RPL8
3.55913e-115	0.340455	0.935	0.655	7.11826e-112	7	CSF2RB
4.56886e-115	0.248603	0.916	0.617	9.13773e-112	7	FAM178B
1.70669e-114	0.359304	0.97	0.742	3.41338e-111	7	RAP2B
3.48377e-114	0.138691	0.842	0.557	6.96754e-111	7	SEC14L2
1.49037e-113	0.432736	0.996	0.833	2.98073e-110	7	NME4
2.77634e-113	0.167142	0.918	0.739	5.55267e-110	7	FAM129B
3.38175e-113	0.318347	0.935	0.652	6.76351e-110	7	DDI2
2.7825e-112	0.345096	0.998	0.908	5.565e-109	7	PRDX2
6.35587e-111	0.366333	0.998	0.877	1.27117e-107	7	TMEM14B
8.65847e-111	0.407444	1	0.99	1.73169e-107	7	RPL18A
2.21968e-110	0.361913	0.922	0.675	4.43935e-107	7	MINPP1
2.76283e-110	0.108015	0.88	0.536	5.52565e-107	7	LAT
6.18451e-110	0.324266	0.901	0.504	1.2369e-106	7	KCNH2
9.15328e-109	0.143388	0.833	0.466	1.83066e-105	7	BBC3
4.10592e-108	0.346681	0.878	0.579	8.21184e-105	7	EPCAM
5.50284e-108	0.365093	0.985	0.85	1.10057e-104	7	HBS1L
6.76625e-108	0.36934	0.987	0.845	1.35325e-104	7	CD82
8.45928e-108	0.109802	0.846	0.474	1.69186e-104	7	ITGB4
7.33544e-107	0.201169	0.956	0.716	1.46709e-103	7	TGIF1
3.47956e-105	0.185163	0.892	0.481	6.95911e-102	7	CA1
7.50226e-105	0.439862	0.996	0.921	1.50045e-101	7	ATP5IF1
1.06838e-104	0.302696	0.956	0.695	2.13677e-101	7	DAAM1
2.24413e-103	0.36048	1	0.955	4.48826e-100	7	SERBP1
3.92919e-103	0.29078	0.916	0.707	7.85838e-100	7	STRADB
7.34908e-103	0.425714	0.992	0.846	1.46982e-99	7	ALDH1A1
1.59044e-102	0.26271	0.93	0.684	3.18088e-99	7	TAL1
5.94578e-102	0.323341	0.962	0.735	1.18916e-98	7	ISOC2
1.67229e-100	0.313586	0.947	0.694	3.34459e-97	7	SLC39A8
8.44122e-100	0.26493	0.935	0.69	1.68824e-96	7	THG1L
6.25664e-99	0.356874	0.966	0.794	1.25133e-95	7	AKR1C3
7.50021e-99	0.350196	0.996	0.855	1.50004e-95	7	TIMM13
9.46878e-99	0.360172	0.992	0.92	1.89376e-95	7	CCT2
1.87184e-98	0.253208	0.941	0.644	3.74368e-95	7	FADS2
6.20987e-98	0.34564	0.998	0.87	1.24197e-94	7	GSPT1
8.31603e-98	0.308454	0.968	0.795	1.66321e-94	7	SLC12A6
1.00971e-97	0.354369	1	0.976	2.01942e-94	7	RPL23
2.23758e-97	0.344122	0.981	0.834	4.47516e-94	7	PRDX3
3.77893e-97	0.249555	0.939	0.631	7.55786e-94	7	HAGH
4.1311e-97	0.2297	0.907	0.64	8.26221e-94	7	GMPR
4.31891e-97	0.307777	0.935	0.761	8.63782e-94	7	MYH10
5.0103e-97	0.36665	0.989	0.889	1.00206e-93	7	ATF7IP2
3.60582e-95	0.280716	0.956	0.664	7.21164e-92	7	MRPL15
3.85544e-95	0.149187	0.945	0.74	7.71088e-92	7	CNKSR3
9.7245e-95	0.190433	0.937	0.67	1.9449e-91	7	PCYT2
1.54047e-94	0.386431	1	0.985	3.08094e-91	7	RPL5
2.98544e-94	0.289061	0.96	0.747	5.97087e-91	7	NDUFA8
3.32081e-94	0.374061	0.998	0.956	6.64162e-91	7	HSPD1
3.65166e-94	0.378208	1	0.94	7.30332e-91	7	LDHB
4.3147e-94	0.19846	0.84	0.482	8.62939e-91	7	TNFRSF25
5.27363e-94	0.282945	0.928	0.667	1.05473e-90	7	FSCN1
6.70153e-94	0.270406	0.922	0.696	1.34031e-90	7	FAM210B
7.22217e-94	0.249614	0.842	0.515	1.44443e-90	7	DLC1
8.04241e-94	0.319131	0.981	0.78	1.60848e-90	7	TIMP1
1.58687e-93	0.406496	0.998	0.887	3.17374e-90	7	TFRC
3.76162e-93	0.309234	0.981	0.768	7.52323e-90	7	GCSH
1.02169e-92	0.276626	0.941	0.76	2.04338e-89	7	ORC4
3.16073e-91	0.39887	0.979	0.792	6.32145e-88	7	CYTL1
8.90564e-91	0.350325	0.994	0.924	1.78113e-87	7	METAP2
2.83552e-90	0.389961	1	0.986	5.67105e-87	7	RPS14
1.74037e-89	0.461741	1	0.965	3.48073e-86	7	RPS5
4.51339e-89	0.27336	0.951	0.696	9.02678e-86	7	ZNF385D
6.59198e-89	0.124029	0.829	0.455	1.3184e-85	7	PKLR
1.41935e-88	0.332824	1	0.9	2.83871e-85	7	TSPO
1.84953e-88	0.434899	1	0.972	3.69906e-85	7	RPL10A
1.87947e-88	0.338305	0.989	0.868	3.75895e-85	7	CAST
2.52479e-88	0.307215	0.973	0.791	5.04959e-85	7	DECR1
3.74845e-88	0.283578	0.966	0.814	7.49691e-85	7	NDFIP1
5.31958e-88	0.402733	1	0.984	1.06392e-84	7	RPL7A
5.61569e-88	0.189722	0.886	0.658	1.12314e-84	7	GDPD1
7.02043e-88	0.31424	0.983	0.81	1.40409e-84	7	MRPS15
9.37775e-88	0.202711	0.932	0.681	1.87555e-84	7	GDF11
1.18921e-87	0.291024	0.941	0.669	2.37841e-84	7	FAM45A
3.63358e-87	0.381305	1	0.994	7.26715e-84	7	RPS18
5.21258e-87	0.368347	0.996	0.888	1.04252e-83	7	MIF
6.8592e-87	0.309399	0.968	0.821	1.37184e-83	7	NIPSNAP2
7.0099e-87	0.26786	0.897	0.631	1.40198e-83	7	SORD
8.13216e-87	0.402566	1	0.983	1.62643e-83	7	FTH1
3.69865e-86	0.187301	0.928	0.662	7.39729e-83	7	PLA2G12A
1.15381e-85	0.260211	0.924	0.715	2.30763e-82	7	SARS
3.23248e-84	0.209325	0.859	0.63	6.46495e-81	7	SUCLG2
4.93544e-84	0.227862	0.924	0.699	9.87088e-81	7	MBOAT2
6.67133e-84	0.375893	1	0.986	1.33427e-80	7	RPL13A
7.27777e-84	0.197932	0.907	0.645	1.45555e-80	7	TP53RK
1.68112e-83	0.25384	0.882	0.677	3.36224e-80	7	ALAD
1.83781e-82	0.289945	0.964	0.755	3.67561e-79	7	FKBP4
4.73765e-82	0.344574	0.998	0.946	9.47529e-79	7	EIF3A
1.90407e-81	0.366131	0.996	0.877	3.80813e-78	7	NAA38
4.06092e-81	0.342719	0.994	0.888	8.12184e-78	7	HMGA1
4.26087e-81	0.258974	0.895	0.703	8.52173e-78	7	ELOVL6
1.84696e-80	0.316434	0.994	0.897	3.69393e-77	7	APRT
4.39286e-80	0.268125	0.998	0.875	8.78572e-77	7	CST3
8.71128e-80	0.289995	0.968	0.806	1.74226e-76	7	TPGS2
2.1796e-79	0.31233	0.996	0.875	4.3592e-76	7	GADD45GIP1
3.46154e-79	0.286534	0.989	0.822	6.92308e-76	7	MRPL52
3.84533e-79	0.220852	0.956	0.764	7.69067e-76	7	KIF13A
5.14109e-79	0.243675	0.935	0.733	1.02822e-75	7	BLVRA
5.2419e-79	0.275502	0.994	0.87	1.04838e-75	7	WDR43
5.66368e-79	0.357619	0.998	0.91	1.13274e-75	7	EIF5A
8.06038e-79	0.216301	0.882	0.642	1.61208e-75	7	HMBS
1.90448e-77	0.172038	0.882	0.704	3.80897e-74	7	CAPRIN2
8.89985e-77	0.253142	0.935	0.717	1.77997e-73	7	CMAS
8.94413e-77	0.191373	0.844	0.616	1.78883e-73	7	PIP5K1B
1.16284e-76	0.132873	0.897	0.649	2.32567e-73	7	NECTIN1
1.21633e-76	0.30542	0.994	0.911	2.43266e-73	7	ATP5F1B
3.25515e-76	0.117318	0.77	0.489	6.5103e-73	7	RNASE1
3.40068e-76	0.191485	0.783	0.587	6.80136e-73	7	GRTP1
4.88555e-76	0.289637	0.964	0.777	9.7711e-73	7	FCGRT
1.15386e-75	0.297619	0.996	0.885	2.30773e-72	7	COX5A
1.50826e-75	0.386373	1	0.985	3.01652e-72	7	RPS3
2.28777e-75	0.136527	0.825	0.588	4.57553e-72	7	BOLA3-AS1
2.98755e-75	0.219031	0.939	0.802	5.97511e-72	7	CDC42BPA
4.73089e-75	0.163287	0.838	0.564	9.46179e-72	7	EPOR
8.48492e-75	0.394472	1	0.992	1.69698e-71	7	RPL10
1.2679e-74	0.157219	0.831	0.507	2.53579e-71	7	P2RX5
1.73243e-74	0.310556	1	0.931	3.46487e-71	7	TXN
3.18899e-74	0.210575	0.92	0.747	6.37798e-71	7	CENPV
3.89457e-74	0.252369	0.926	0.774	7.78914e-71	7	NET1
4.96236e-74	0.27063	0.806	0.516	9.92472e-71	7	GBGT1
6.02212e-74	0.105985	0.886	0.623	1.20442e-70	7	SH3PXD2A
9.18671e-74	0.26746	0.966	0.79	1.83734e-70	7	CYC1
1.33253e-73	0.251477	0.968	0.815	2.66505e-70	7	MRPL3
2.38593e-73	0.205701	0.945	0.74	4.77187e-70	7	OAT
1.06812e-72	0.175302	0.819	0.596	2.13625e-69	7	SPTA1
1.46232e-72	0.114053	0.8	0.524	2.92464e-69	7	ATP7B
4.45721e-72	0.211004	0.895	0.59	8.91442e-69	7	TESC
5.97141e-72	0.288803	1	0.942	1.19428e-68	7	SSB
1.12298e-71	0.207674	0.892	0.721	2.24596e-68	7	CBLL1
1.31626e-71	0.273391	0.989	0.846	2.63253e-68	7	MRPS34
1.68299e-71	0.346811	1	0.987	3.36597e-68	7	RPL41
2.37116e-71	0.218704	0.895	0.613	4.74231e-68	7	MGAT4B
3.41911e-71	0.259718	0.983	0.821	6.83822e-68	7	SLIRP
4.00323e-71	0.26479	0.989	0.869	8.00647e-68	7	TUFM
1.64947e-70	0.245505	0.979	0.815	3.29895e-67	7	TAF9
2.92441e-70	0.284458	0.985	0.829	5.84883e-67	7	MAP2K2
3.37461e-70	0.280626	0.975	0.829	6.74922e-67	7	MDH2
4.86841e-70	0.221629	0.966	0.826	9.73683e-67	7	BMS1
9.5692e-70	0.104098	0.878	0.623	1.91384e-66	7	FBN1
9.70272e-70	0.250103	0.981	0.825	1.94054e-66	7	VDAC3
2.41753e-69	0.154531	0.81	0.563	4.83505e-66	7	DAG1
2.78681e-69	0.246807	0.968	0.811	5.57362e-66	7	MRPS25
3.751e-69	0.231502	0.909	0.695	7.502e-66	7	CASP6
4.01932e-69	0.162405	0.958	0.783	8.03863e-66	7	CTNNAL1
4.36636e-69	0.193652	0.882	0.703	8.73273e-66	7	RCL1
9.90889e-69	0.357557	1	0.971	1.98178e-65	7	RPS13
1.52019e-68	0.237198	0.975	0.812	3.04038e-65	7	MPP1
2.23994e-68	0.184031	0.954	0.809	4.47988e-65	7	LMNA
8.21954e-68	0.251227	0.989	0.845	1.64391e-64	7	PHB
1.16346e-67	0.198694	0.903	0.766	2.32693e-64	7	SSX2IP
1.24336e-67	0.176957	0.962	0.789	2.48673e-64	7	MXD1
[truncated: 2,966 more rows]

## Sheet: Table S3
Table S3. scATAC-seq TF cluster markers of Lin-CD34+ HSPCs from HD and MDS-RS samples
p_val	avg_logFC	pct.1	pct.2	p_val_adj	cluster	gene
4.19195e-101	0.0714715	1	1	2.42714e-98	0	SPI1
4.27425e-99	0.0470289	1	1	2.47479e-96	0	SPIC
1.35353e-83	0.0718137	1	1	7.83693e-81	0	CEBPA
2.56581e-57	0.0794595	1	1	1.4856e-54	0	FOSL2::JUND
8.06366e-57	0.072548	1	1	4.66886e-54	0	JUN::JUNB
1.50726e-56	0.059296	1	1	8.72704e-54	0	FOS::JUN
1.50726e-56	0.059296	1	1	8.72704e-54	0	FOSB::JUNB
1.50726e-56	0.059296	1	1	8.72704e-54	0	FOSL2::JUNB
3.1892e-53	0.0560894	1	1	1.84655e-50	0	FOSL1::JUN
4.03933e-53	0.0149069	1	1	2.33877e-50	0	SPIB
4.75714e-53	0.0603641	1	1	2.75438e-50	0	FOSL2::JUN
5.93545e-47	0.0698024	1	1	3.43663e-44	0	ATF4
4.93435e-45	0.0398227	1	1	2.85699e-42	0	FOSL1::JUNB
8.14813e-45	0.029995	1	1	4.71777e-42	0	Ascl2
3.23648e-44	0.0488918	1	1	1.87392e-41	0	FOSL1::JUND
1.64575e-43	0.0545315	1	1	9.52886e-41	0	FOS::JUND
2.64976e-42	0.0289518	1	1	1.53421e-39	0	ID4
1.24644e-40	0.0216685	1	1	7.21691e-38	0	Myod1
1.29737e-38	0.0555743	1	1	7.51175e-36	0	IRF8
1.47778e-38	0.0469836	1	1	8.55636e-36	0	JDP2
4.92451e-38	0.0345948	1	1	2.85129e-35	0	JUN(var.2)
5.08087e-36	0.0471847	1	1	2.94183e-33	0	FOSL2
2.69984e-34	0.0202677	1	1	1.56321e-31	0	SNAI2
1.94326e-33	0.0258532	1	1	1.12515e-30	0	ESR2
2.29373e-33	0.0184508	1	1	1.32807e-30	0	ASCL1
1.33332e-31	0.0507044	1	1	7.71991e-29	0	JUND
7.49922e-31	0.0453859	1	1	4.34205e-28	0	IRF5
5.36572e-30	0.0142205	1	1	3.10675e-27	0	NR4A2
9.77818e-30	0.0184409	1	1	5.66156e-27	0	Pparg::Rxra
2.38037e-27	0.0336476	1	1	1.37823e-24	0	ELF5
2.52454e-27	0.0371979	1	1	1.46171e-24	0	NFKB1
7.27331e-27	0.0370382	1	1	4.21125e-24	0	JUNB
1.72739e-26	0.0591516	1	1	1.00016e-23	0	NFE2
1.79519e-26	0.0600317	1	1	1.03942e-23	0	ESRRB
3.8184e-26	0.0141999	1	1	2.21085e-23	0	IRF3
2.9922e-25	0.0348582	1	1	1.73249e-22	0	IRF9
3.74992e-25	0.040408	1	1	2.1712e-22	0	NR4A2::RXRA
2.15494e-24	0.0464849	1	1	1.24771e-21	0	IRF4
4.67217e-24	0.0399888	1	1	2.70519e-21	0	FOS
1.90666e-22	0.0175061	1	1	1.10396e-19	0	Klf1
2.07235e-21	0.0448691	1	1	1.19989e-18	0	PRDM1
3.46778e-21	0.0602703	1	1	2.00784e-18	0	PAX1
1.76655e-20	0.00700748	1	1	1.02283e-17	0	Arnt
2.30244e-20	0.0127194	1	1	1.33311e-17	0	MGA
2.30244e-20	0.0127194	1	1	1.33311e-17	0	TBX15
2.30244e-20	0.0127194	1	1	1.33311e-17	0	TBX1
1.00335e-19	0.0398403	1	1	5.8094e-17	0	FOS::JUNB
3.25615e-19	0.0157276	1	1	1.88531e-16	0	Myog
6.25155e-19	0.0639134	1	1	3.61965e-16	0	CLOCK
1.78137e-18	0.0244212	1	1	1.03141e-15	0	FOSL1
2.59837e-17	0.0148662	1	1	1.50445e-14	0	IRF2
4.08081e-17	0.0304022	1	1	2.36279e-14	0	RXRB
7.8619e-17	0.0105375	1	1	4.55204e-14	0	KLF9
1.72256e-16	0.0712299	1	1	9.97361e-14	0	CEBPB
1.72256e-16	0.0712299	1	1	9.97361e-14	0	CEBPD
1.72256e-16	0.0712299	1	1	9.97361e-14	0	CEBPE
3.35591e-16	0.00977581	1	1	1.94307e-13	0	STAT1::STAT2
1.25715e-15	0.0289002	1	1	7.27893e-13	0	Rxra
2.31704e-15	0.0187799	1	1	1.34157e-12	0	JUN
3.34454e-15	0.0275323	1	1	1.93649e-12	0	RXRG
1.49257e-14	0.0322829	1	1	8.64197e-12	0	EBF1
1.81775e-14	0.0280309	1	1	1.05248e-11	0	Hand1::Tcf3
1.87414e-14	0.0441353	1	1	1.08513e-11	0	XBP1
1.89161e-14	0.014568	1	1	1.09524e-11	0	Creb3l2
2.64405e-14	0.0452143	1	1	1.53091e-11	0	CREB3L1
2.96175e-14	0.0285353	1	1	1.71485e-11	0	ZNF143
3.08218e-14	0.0483158	1	1	1.78458e-11	0	PAX9
9.48996e-14	0.0419466	1	1	5.49469e-11	0	MSC
9.64959e-14	0.0171413	1	1	5.58711e-11	0	Tcf12
1.34962e-13	0.0249727	1	1	7.81429e-11	0	BATF::JUN
1.86791e-13	0.0420269	1	1	1.08152e-10	0	MAX::MYC
3.567e-13	0.0240926	1	1	2.06529e-10	0	Nr2f6
5.11042e-13	0.0111894	1	1	2.95893e-10	0	KLF13
1.00279e-12	0.0256315	1	1	5.80615e-10	0	DMRT3
1.06338e-12	0.010162	1	1	6.15697e-10	0	RARA::RXRG
1.55671e-12	0.00784169	1	1	9.01336e-10	0	TBX4
1.55671e-12	0.00784169	1	1	9.01336e-10	0	TBX5
1.95882e-12	0.017821	1	1	1.13415e-09	0	NHLH1
3.99028e-12	0.11047	0.997	0.997	2.31037e-09	0	MYBL1
5.23398e-12	0.0110523	1	1	3.03047e-09	0	Stat6
8.68461e-12	0.0213386	1	1	5.02839e-09	0	FIGLA
2.6178e-11	0.00641049	1	1	1.51571e-08	0	HIC2
2.63023e-11	0.00990521	1	1	1.5229e-08	0	Sox17
2.83067e-11	0.0336808	1	1	1.63896e-08	0	SRF
3.95801e-11	0.00827873	1	1	2.29169e-08	0	NR2C2
4.77237e-11	0.0122844	1	1	2.7632e-08	0	IRF7
7.23798e-11	0.0382336	1	1	4.19079e-08	0	Esrra
7.54203e-11	0.0101398	1	1	4.36683e-08	0	TFAP2B
7.82811e-11	0.00837602	1	1	4.53248e-08	0	Znf423
1.86908e-10	0.0169516	1	1	1.0822e-07	0	Esrrg
2.32677e-10	0.0172698	1	1	1.3472e-07	0	JUNB(var.2)
3.08176e-10	0.0254227	1	1	1.78434e-07	0	Rarg(var.2)
7.55754e-10	0.00928569	1	1	4.37582e-07	0	TFAP2C
1.18487e-09	0.021918	1	1	6.86042e-07	0	TEF
1.84778e-09	0.00478334	1	1	1.06986e-06	0	RREB1
3.19048e-09	0.041345	1	1	1.84729e-06	0	PKNOX2
3.46621e-09	0.0066547	1	1	2.00694e-06	0	MEF2B
3.8503e-09	0.0157406	1	1	2.22932e-06	0	NFKB2
4.54498e-09	0.0490526	1	1	2.63154e-06	0	TGIF1
6.28876e-09	0.00939296	1	1	3.64119e-06	0	TFDP1
7.10369e-09	0.0282809	1	1	4.11304e-06	0	HES5
1.01149e-08	0.0332043	1	1	5.85653e-06	0	TBR1
1.32464e-08	0.0297216	1	1	7.66968e-06	0	Creb5
1.95326e-08	0.0335234	1	1	1.13094e-05	0	OLIG2
1.95326e-08	0.0335234	1	1	1.13094e-05	0	OLIG1
2.36517e-08	0.0211143	1	1	1.36944e-05	0	GMEB2
2.67006e-08	0.0294123	1	1	1.54596e-05	0	OLIG3
2.93759e-08	0.0139805	1	1	1.70086e-05	0	MNT
3.05818e-08	0.0107145	1	1	1.77068e-05	0	KLF4
3.27246e-08	0.020423	1	1	1.89475e-05	0	RORC
3.9863e-08	0.00464283	1	1	2.30807e-05	0	ZNF740
4.30466e-08	0.0170519	1	1	2.4924e-05	0	Arntl
4.61129e-08	0.0123547	1	1	2.66994e-05	0	MYB
5.11285e-08	0.0235687	1	1	2.96034e-05	0	HEY1
5.91237e-08	0.00754843	1	1	3.42326e-05	0	Klf12
5.95757e-08	0.018935	1	1	3.44943e-05	0	PPARG
6.26944e-08	0.0233165	1	1	3.63001e-05	0	HEY2
8.48668e-08	0.027229	1	1	4.91379e-05	0	FOSL2::JUNB(var.2)
1.06614e-07	0.00992811	1	1	6.17296e-05	0	MYC
1.48444e-07	0.0133199	1	1	8.59491e-05	0	FOSL2::JUND(var.2)
2.12051e-07	0.0236047	1	1	0.000122777	0	HES7
2.12565e-07	0.0394483	1	1	0.000123075	0	FOSL1::JUN(var.2)
2.76078e-07	0.0103371	1	1	0.000159849	0	TCF3
2.77532e-07	0.0310362	1	1	0.000160691	0	MTF1
2.9705e-07	0.0124153	1	1	0.000171992	0	NFIL3
3.60614e-07	0.0264518	1	1	0.000208795	0	Neurog1
4.5631e-07	0.0399677	1	1	0.000264203	0	TFCP2
4.82092e-07	0.00836768	1	1	0.000279131	0	Atf3
4.85569e-07	0.00492735	1	1	0.000281144	0	MEF2D
5.53624e-07	0.021708	1	1	0.000320548	0	SCRT1
5.67045e-07	0.0188423	1	1	0.000328319	0	SREBF2
7.24394e-07	0.0176215	1	1	0.000419424	0	CREB1
9.04333e-07	0.0183473	1	1	0.000523609	0	Hes2
9.17676e-07	0.0212054	1	1	0.000531335	0	CREB3
1.10978e-06	0.0100603	1	1	0.000642565	0	JUND(var.2)
1.26354e-06	0.0195936	1	1	0.000731591	0	NR1A4::RXRA
1.33433e-06	0.0193025	1	1	0.000772576	0	ESR1
1.47446e-06	0.00557702	1	1	0.00085371	0	KLF5
1.49797e-06	0.0374754	1	1	0.000867323	0	BATF3
1.77423e-06	0.0163006	1	1	0.00102728	0	GLIS3
2.48014e-06	0.045668	1	1	0.001436	0	CEBPG
2.66769e-06	0.00867351	1	1	0.0015446	0	PBX3
3.51051e-06	0.0157069	1	1	0.00203259	0	MYCN
3.62086e-06	0.0228736	1	1	0.00209648	0	FOSL2::JUN(var.2)
3.67601e-06	0.0167906	1	1	0.00212841	0	FOSB::JUNB(var.2)
4.77947e-06	0.00643787	1	1	0.00276731	0	MXI1
4.81207e-06	0.0312267	1	1	0.00278619	0	SCRT2
5.52216e-06	0.00775432	1	1	0.00319733	0	Sox3
8.04668e-06	0.0200295	1	1	0.00465903	0	PBX2
1.25617e-05	0.030903	1	1	0.00727321	0	T
1.27151e-05	0.00598478	1	1	0.00736205	0	MZF1(var.2)
1.51417e-05	0.00863079	1	1	0.00876705	0	YY1
1.51603e-05	0.0109692	1	1	0.00877779	0	NR2F1
1.74197e-05	0.00766401	1	1	0.010086	0	Atf1
2.24009e-05	0.0205612	1	1	0.0129701	0	JUN::JUNB(var.2)
3.25656e-05	0.0203591	1	1	0.0188555	0	E2F7
3.29686e-05	0.0147375	1	1	0.0190888	0	PAX5
3.81075e-05	0.03228	1	1	0.0220642	0	PKNOX1
3.99388e-05	0.0158869	1	1	0.0231246	0	TP63
4.33278e-05	0.0214387	1	1	0.0250868	0	Npas2
5.24722e-05	0.0180504	1	1	0.0303814	0	E2F2
0.00010012	0.0328757	1	1	0.0579698	0	NEUROG2
0.000149153	0.0135328	1	1	0.0863596	0	ZBTB18
0.000150071	0.0161686	1	1	0.086891	0	MLX
0.000150071	0.0161686	1	1	0.086891	0	MLXIPL
0.000150071	0.0161686	1	1	0.086891	0	SREBF2(var.2)
0.000150071	0.0161686	1	1	0.086891	0	Srebf1(var.2)
0.000170762	0.00552326	1	1	0.0988713	0	TFAP2B(var.3)
0.000198711	0.0274092	1	1	0.115054	0	Nkx2-5(var.2)
0.000208728	0.0211633	1	1	0.120853	0	JDP2(var.2)
0.000288898	0.0146701	1	1	0.167272	0	HIF1A
0.000412197	0.00909536	1	1	0.238662	0	HSF2
0.000472189	0.00451355	1	1	0.273398	0	TFAP2A(var.3)
0.000484584	0.00925059	1	1	0.280574	0	HSF4
0.000545661	0.00378352	1	1	0.315938	0	SP4
0.000594283	0.0129352	1	1	0.34409	0	Gfi1
0.000777548	0.00255997	1	1	0.4502	0	Id2
0.000784994	0.00719339	1	1	0.454512	0	TCF4
0.000994872	0.00315118	1	1	0.576031	0	TFE3
0.00109191	0.00436417	1	1	0.632218	0	TFAP2C(var.3)
0.00109485	0.00238288	1	1	0.633921	0	IRF1
0.00117655	0.0208239	1	1	0.68122	0	RXRA::VDR
0.00124316	0.00830534	1	1	0.719787	0	SREBF1
0.00156268	0.0161707	1	1	0.904792	0	BHLHE22
0.00177785	0.0108131	1	1	1	0	MAX
0.00184175	0.00998449	1	1	1	0	TEAD2
0.00215986	0.0213995	1	1	1	0	TGIF2
0.00216152	0.00944634	1	1	1	0	DBP
0.00218428	0.00231746	1	1	1	0	Mlxip
0.00232686	0.00331101	1	1	1	0	USF2
0.00233518	0.0150311	1	1	1	0	NEUROD2
0.0024458	0.00676117	1	1	1	0	Nr5a2
0.0031418	0.0035966	1	1	1	0	Gabpa
0.00342158	0.00294226	1	1	1	0	SP3
0.00385629	0.0124737	1	1	1	0	Gfi1b
0.00425172	0.016156	1	1	1	0	NFIC::TLX1
0.00447992	0.00557121	1	1	1	0	Hic1
0.00512294	0.00956911	1	1	1	0	ATF7
0.00565006	0.0160899	1	1	1	0	GRHL1
0.00609643	0.0093785	1	1	1	0	NR2F2
0.00628487	0.0167974	1	1	1	0	TP53
0.00641136	0.00388403	1	1	1	0	EGR1
0.00662898	0.0415842	1	1	1	0	E2F1
0.00698358	0.0173073	1	1	1	0	Tcf21
0.00741436	0.00651753	1	1	1	0	USF1
0.00930163	0.00140765	1	1	1	0	MEF2A
0.00949427	0.00619749	1	1	1	0	FOSL1::JUND(var.2)
6.39115e-206	0.0252905	1	1	3.70048e-203	1	Arid3a
6.44927e-159	0.0214146	1	1	3.73413e-156	1	ZNF354C
2.96917e-156	0.0228667	1	1	1.71915e-153	1	MZF1
6.41461e-156	0.0908344	1	1	3.71406e-153	1	Hoxc9
2.06448e-152	0.0219932	1	1	1.19533e-149	1	MAFG::NFE2L1
3.90968e-141	0.01777	1	1	2.26371e-138	1	MEIS1
5.34376e-135	0.0241657	1	1	3.09404e-132	1	SPIB
1.22032e-129	0.0682319	1	1	7.06568e-127	1	RUNX1
3.41383e-123	0.104618	1	1	1.97661e-120	1	Hoxa9
1.53645e-119	0.0158424	1	1	8.89607e-117	1	NFATC2
1.15645e-105	0.0180281	1	1	6.69585e-103	1	IRF1
4.46352e-86	0.0154762	1	1	2.58438e-83	1	FOXL1
4.46352e-86	0.0154762	1	1	2.58438e-83	1	FOXP3
5.24105e-86	0.0159044	1	1	3.03457e-83	1	FOXD2
2.33987e-80	0.0190511	1	1	1.35479e-77	1	Sox5
5.47085e-77	0.053321	1	1	3.16762e-74	1	RUNX3
1.57383e-75	0.069011	1	1	9.11249e-73	1	MAF::NFE2
4.27287e-69	0.0598789	1	1	2.47399e-66	1	SPI1
3.30501e-68	0.0217948	1	1	1.9136e-65	1	Hoxd8
1.24652e-64	0.0207887	1	1	7.21736e-62	1	PDX1
3.59464e-64	0.0110421	1	1	2.08129e-61	1	ZNF384
7.96348e-63	0.0646036	1	1	4.61085e-60	1	BACH2
2.04481e-60	0.0122138	1	1	1.18395e-57	1	MEF2C
4.33383e-60	0.0140065	1	1	2.50929e-57	1	Nkx2-5
2.11513e-58	0.0205321	1	1	1.22466e-55	1	Dlx2
2.87539e-57	0.0166014	1	1	1.66485e-54	1	Nr2e3
4.96264e-57	0.035816	1	1	2.87337e-54	1	SPIC
6.17695e-56	0.0454076	1	1	3.57645e-53	1	NEUROD1
1.62189e-52	0.033157	1	1	9.39074e-50	1	MAFF
6.75521e-52	0.0113509	1	1	3.91127e-49	1	Foxj3
5.59048e-51	0.0194726	1	1	3.23689e-48	1	POU4F3
1.05142e-49	0.0194751	1	1	6.08771e-47	1	POU4F1
2.00452e-49	0.0395863	1	1	1.16062e-46	1	MAFK
2.73209e-48	0.0162782	1	1	1.58188e-45	1	ONECUT3
9.37839e-45	0.0194878	1	1	5.43009e-42	1	NKX6-1
5.28632e-44	0.0509984	1	1	3.06078e-41	1	TAL1::TCF3
3.15883e-43	0.0160623	1	1	1.82896e-40	1	Dlx3
6.03427e-43	0.034673	1	1	3.49384e-40	1	MAFG
6.52071e-43	0.0186687	1	1	3.77549e-40	1	VAX1
6.52071e-43	0.0186687	1	1	3.77549e-40	1	VAX2
5.762e-42	0.0234359	1	1	3.3362e-39	1	Ascl2
2.23084e-41	0.0163172	1	1	1.29166e-38	1	BARX1
8.39897e-41	0.0150185	1	1	4.863e-38	1	ONECUT2
2.34772e-39	0.0143145	1	1	1.35933e-36	1	Smad4
4.19547e-39	0.0152192	1	1	2.42918e-36	1	Dlx4
6.51268e-37	0.0136744	1	1	3.77084e-34	1	MEIS3
6.1195e-36	0.0446705	1	1	3.54319e-33	1	Nfe2l2
2.23831e-35	0.0220389	1	1	1.29598e-32	1	IRF2
4.6256e-35	0.0158131	1	1	2.67822e-32	1	LMX1B
8.90132e-35	0.0169112	1	1	5.15386e-32	1	IRF3
2.7324e-32	0.0124312	1	1	1.58206e-29	1	FOXI1
2.7324e-32	0.0124312	1	1	1.58206e-29	1	FOXO4
2.7324e-32	0.0124312	1	1	1.58206e-29	1	FOXO6
7.05486e-32	0.0492227	1	1	4.08476e-29	1	NR3C2
3.33827e-30	0.0280335	1	1	1.93286e-27	1	Stat5a::Stat5b
4.56388e-30	0.0146722	1	1	2.64249e-27	1	STAT1::STAT2
2.19771e-29	0.0178255	1	1	1.27248e-26	1	HOXB2
2.7026e-29	0.0159832	1	1	1.56481e-26	1	HOXA10
1.43382e-28	0.0209317	1	1	8.30181e-26	1	Dlx1
4.84497e-28	0.0341658	1	1	2.80524e-25	1	RELA
1.70733e-27	0.0121199	1	1	9.88542e-25	1	TBX4
1.70733e-27	0.0121199	1	1	9.88542e-25	1	TBX5
3.94712e-27	0.02342	1	1	2.28538e-24	1	REL
3.97032e-27	0.0221464	1	1	2.29882e-24	1	EMX1
4.93064e-27	0.020713	1	1	2.85484e-24	1	IRF7
6.38223e-27	0.0133103	1	1	3.69531e-24	1	Msx3
6.97517e-27	0.0114245	1	1	4.03862e-24	1	NKX6-2
9.59209e-27	0.024947	1	1	5.55382e-24	1	Sox1
2.14868e-26	0.0185029	1	1	1.24409e-23	1	Stat4
2.10855e-25	0.0123981	1	1	1.22085e-22	1	ONECUT1
2.42546e-25	0.0129799	1	1	1.40434e-22	1	FOXA1
2.59884e-25	0.0167147	1	1	1.50473e-22	1	Stat6
4.37349e-25	0.0131376	1	1	2.53225e-22	1	DLX6
1.03192e-24	0.015133	1	1	5.97483e-22	1	Hoxd3
1.53231e-24	0.0306061	1	1	8.87208e-22	1	CEBPA
8.0131e-24	0.0373153	1	1	4.63959e-21	1	BHLHE23
9.64735e-24	0.0182177	1	1	5.58581e-21	1	CDX2
1.22501e-23	0.0186803	1	1	7.0928e-21	1	NFIX
1.97943e-23	0.0202502	1	1	1.14609e-20	1	Bcl6
2.50257e-23	0.0332058	1	1	1.44899e-20	1	Bach1::Mafk
2.7198e-23	0.0143357	1	1	1.57476e-20	1	VSX2
2.72225e-23	0.013705	1	1	1.57618e-20	1	CDX1
4.47363e-23	0.01407	1	1	2.59023e-20	1	VSX1
8.33921e-23	0.0154062	1	1	4.8284e-20	1	Lhx3
3.66928e-22	0.0155963	1	1	2.12451e-19	1	POU4F2
4.55273e-22	0.0083192	1	1	2.63603e-19	1	Foxd3
4.55795e-22	0.0301522	1	1	2.63906e-19	1	EOMES
1.8632e-21	0.0321387	1	1	1.07879e-18	1	IRF9
5.47139e-21	0.0114223	1	1	3.16794e-18	1	MGA
5.47139e-21	0.0114223	1	1	3.16794e-18	1	TBX15
5.47139e-21	0.0114223	1	1	3.16794e-18	1	TBX1
2.26462e-20	0.0254011	1	1	1.31122e-17	1	RFX5
3.86493e-20	0.0127123	1	1	2.2378e-17	1	Arid5a
4.2931e-20	0.0270735	1	1	2.4857e-17	1	ZBTB18
1.19432e-19	0.0157254	1	1	6.91513e-17	1	HESX1
2.05409e-19	0.0399954	1	1	1.18932e-16	1	NR3C1
1.21385e-18	0.0201164	1	1	7.02818e-16	1	SOX21
1.41175e-18	0.0162309	1	1	8.17403e-16	1	Hic1
1.75374e-18	0.00982713	1	1	1.01541e-15	1	ISL2
9.53183e-18	0.0223379	1	1	5.51893e-15	1	STAT1
1.30079e-17	0.0253841	1	1	7.53159e-15	1	Six3
2.15089e-17	0.0164072	1	1	1.24537e-14	1	RAX
2.4355e-17	0.0239387	1	1	1.41016e-14	1	HOXC10
4.67399e-17	0.0199563	1	1	2.70624e-14	1	NFIL3
6.15158e-17	0.0143848	1	1	3.56176e-14	1	MIXL1
6.83578e-17	0.013169	1	1	3.95791e-14	1	TBP
1.89271e-16	0.0115638	1	1	1.09588e-13	1	LIN54
2.64092e-16	0.0247964	1	1	1.52909e-13	1	BCL6B
4.07403e-16	0.00888768	1	1	2.35886e-13	1	SHOX
4.07403e-16	0.00888768	1	1	2.35886e-13	1	Prrx2
4.07403e-16	0.00888768	1	1	2.35886e-13	1	LHX9
4.07403e-16	0.00888768	1	1	2.35886e-13	1	PRRX1
4.07403e-16	0.00888768	1	1	2.35886e-13	1	RAX2
4.07403e-16	0.00888768	1	1	2.35886e-13	1	UNCX
4.44275e-16	0.0129625	1	1	2.57235e-13	1	Alx1
6.78349e-16	0.044179	1	1	3.92764e-13	1	TBX21
1.18342e-15	0.0139362	1	1	6.852e-13	1	ALX3
2.65637e-15	0.0573199	1	1	1.53804e-12	1	PKNOX2
2.81123e-15	0.0278759	1	1	1.6277e-12	1	PBX1
3.77626e-15	0.0221777	1	1	2.18645e-12	1	POU6F2
4.52178e-15	0.0244936	1	1	2.61811e-12	1	SOX8
6.99339e-15	0.0601297	1	1	4.04917e-12	1	PKNOX1
7.9008e-15	0.0182817	1	1	4.57457e-12	1	RFX3
8.9388e-15	0.00987715	1	1	5.17556e-12	1	FOXC2
1.29375e-14	0.0129988	1	1	7.49084e-12	1	SOX9
1.47526e-14	0.0217006	1	1	8.54175e-12	1	Foxo1
1.48981e-14	0.00873573	1	1	8.62602e-12	1	EN1
1.98153e-14	0.0123955	1	1	1.14731e-11	1	Hoxb5
2.01547e-14	0.0149605	1	1	1.16696e-11	1	JUND(var.2)
2.19876e-14	0.012755	1	1	1.27308e-11	1	MNX1
2.3254e-14	0.0392119	1	1	1.34641e-11	1	TFAP4
2.64979e-14	0.0319761	1	1	1.53423e-11	1	PRDM1
2.65603e-14	0.0176271	1	1	1.53784e-11	1	Sox11
4.06357e-14	0.00711541	1	1	2.35281e-11	1	SNAI2
4.43772e-14	0.0193494	1	1	2.56944e-11	1	RFX2
7.63594e-14	0.0143737	1	1	4.42121e-11	1	Rfx1
1.12481e-13	0.0189117	1	1	6.51267e-11	1	DUX4
2.46403e-13	0.00795268	1	1	1.42667e-10	1	Sox2
2.69958e-13	0.0122687	1	1	1.56306e-10	1	Alx4
3.6331e-13	0.0189415	1	1	2.10356e-10	1	FIGLA
4.36519e-13	0.0254523	1	1	2.52745e-10	1	Gfi1b
4.72368e-13	0.0132702	1	1	2.73501e-10	1	HOXA2
1.10838e-12	0.0578028	1	1	6.41752e-10	1	TBX20
1.13719e-12	0.0126586	1	1	6.58435e-10	1	NKX2-8
1.28722e-12	0.0185155	1	1	7.45298e-10	1	TWIST1
1.41094e-12	0.00565821	1	1	8.16932e-10	1	ZNF263
1.45474e-12	0.00767249	1	1	8.42293e-10	1	EWSR1-FLI1
1.46992e-12	0.00925509	1	1	8.51081e-10	1	Hmx3
1.63327e-12	0.00880331	1	1	9.45665e-10	1	FOXC1
1.87139e-12	0.0189695	1	1	1.08353e-09	1	HLF
1.95586e-12	0.0286767	1	1	1.13244e-09	1	Atoh1
2.24158e-12	0.0172358	1	1	1.29787e-09	1	SRY
2.78907e-12	0.0289267	1	1	1.61487e-09	1	IRF4
2.93278e-12	0.0604468	1	1	1.69808e-09	1	TGIF1
2.97737e-12	0.0451311	1	1	1.7239e-09	1	TGIF2
3.25354e-12	0.0091502	1	1	1.8838e-09	1	Hmx2
3.37889e-12	0.0271935	1	1	1.95638e-09	1	MYF6
7.20985e-12	0.0344868	1	1	4.1745e-09	1	Esrra
8.89151e-12	0.0161036	1	1	5.14819e-09	1	Barhl1
9.99257e-12	0.0147093	1	1	5.7857e-09	1	DUXA
1.14857e-11	0.0146709	1	1	6.6502e-09	1	EMX2
1.72185e-11	0.011164	1	1	9.9695e-09	1	Pou5f1::Sox2
2.55419e-11	0.0100358	1	1	1.47888e-08	1	GSX2
3.74109e-11	0.027535	1	1	2.16609e-08	1	Mafb
3.87832e-11	0.0109982	1	1	2.24555e-08	1	Foxq1
4.33336e-11	0.0108368	1	1	2.50902e-08	1	HOXB3
4.55464e-11	0.0123882	1	1	2.63714e-08	1	HNF1B
4.59187e-11	0.0111634	1	1	2.6587e-08	1	Mecom
5.76956e-11	0.0100197	1	1	3.34057e-08	1	FOXB1
7.98626e-11	0.00748498	1	1	4.62404e-08	1	SOX15
8.75207e-11	0.0296398	1	1	5.06745e-08	1	OLIG3
1.00865e-10	0.0170348	1	1	5.84006e-08	1	SOX13
1.01567e-10	0.0293489	1	1	5.88071e-08	1	Tcf21
2.24547e-10	0.0202858	1	1	1.30013e-07	1	HEY1
2.39745e-10	0.0082431	1	1	1.38812e-07	1	Lhx8
2.40771e-10	0.020238	1	1	1.39407e-07	1	HEY2
4.54724e-10	0.0104184	1	1	2.63285e-07	1	Arx
4.80334e-10	0.0283428	1	1	2.78113e-07	1	NEUROD2
5.23574e-10	0.00799065	1	1	3.03149e-07	1	Lhx4
5.81642e-10	0.0285374	1	1	3.36771e-07	1	MSC
5.96803e-10	0.013175	1	1	3.45549e-07	1	EVX1
5.97789e-10	0.0222059	1	1	3.4612e-07	1	Hoxa11
6.02702e-10	0.0168014	1	1	3.48964e-07	1	SIX2
9.33567e-10	0.00890619	1	1	5.40535e-07	1	HNF1A
1.11836e-09	0.025613	1	1	6.4753e-07	1	IRF8
4.52027e-09	0.00820248	1	1	2.61724e-06	1	ZNF24
4.71057e-09	0.0101972	1	1	2.72742e-06	1	mix-a
5.90877e-09	0.0110625	1	1	3.42118e-06	1	STAT3
6.32356e-09	0.0100298	1	1	3.66134e-06	1	ESX1
9.52001e-09	0.02707	1	1	5.51209e-06	1	BHLHE22
1.30593e-08	0.0119552	1	1	7.56131e-06	1	FOXP1
2.14444e-08	0.0107022	1	1	1.24163e-05	1	GBX2
2.77565e-08	0.0102135	1	1	1.6071e-05	1	NFAT5
3.05472e-08	0.0099189	1	1	1.76868e-05	1	LBX2
3.40254e-08	0.0155469	1	1	1.97007e-05	1	DBP
3.97445e-08	0.0151243	1	1	2.3012e-05	1	SOX4
4.35067e-08	0.012771	1	1	2.51904e-05	1	BARHL2
4.39203e-08	0.00700997	1	1	2.54299e-05	1	Nobox
5.42205e-08	0.0237859	1	1	3.13937e-05	1	Ar
6.57413e-08	0.0156822	1	1	3.80642e-05	1	SMAD2::SMAD3::SMAD4
7.57465e-08	0.00822834	1	1	4.38572e-05	1	POU3F3
9.96713e-08	0.0114632	1	1	5.77097e-05	1	Bhlha15
1.15829e-07	0.00888796	1	1	6.70649e-05	1	Arid3b
1.28861e-07	0.0113764	1	1	7.46106e-05	1	RFX4
1.34086e-07	0.0393645	1	1	7.76359e-05	1	NEUROG2
2.0666e-07	0.00557223	1	1	0.000119656	1	RHOXF1
2.63899e-07	0.00887746	1	1	0.000152797	1	FOXP2
3.63005e-07	0.010112	1	1	0.00021018	1	PHOX2A
3.80731e-07	0.00790424	1	1	0.000220443	1	Hmx1
4.44908e-07	0.0171162	1	1	0.000257602	1	ZSCAN4
4.90917e-07	0.0071023	1	1	0.000284241	1	FOXG1
4.90917e-07	0.0071023	1	1	0.000284241	1	Foxj2
5.83296e-07	0.0111485	1	1	0.000337729	1	MEOX2
6.97904e-07	0.00567167	1	1	0.000404087	1	MSX1
8.83541e-07	0.0130989	1	1	0.00051157	1	MEOX1
9.27532e-07	0.0107155	1	1	0.000537041	1	TEAD4
2.16719e-06	0.0095994	1	1	0.0012548	1	Dmbx1
2.60282e-06	0.00681461	1	1	0.00150704	1	SOX10
2.63601e-06	0.018216	1	1	0.00152625	1	Twist2
4.18587e-06	0.0107094	1	1	0.00242362	1	Rhox11
6.75064e-06	0.00547879	1	1	0.00390862	1	ISX
6.75064e-06	0.00547879	1	1	0.00390862	1	Shox2
9.09676e-06	0.0124713	1	1	0.00526702	1	PAX3
1.16701e-05	0.00526684	1	1	0.00675701	1	MSX2
1.24716e-05	0.00871649	1	1	0.00722108	1	Hoxd9
1.41509e-05	0.00401676	1	1	0.00819339	1	ID4
1.5986e-05	0.00912551	1	1	0.00925591	1	NOTO
1.60629e-05	0.00494693	1	1	0.00930044	1	BSX
1.61826e-05	0.0157906	1	1	0.00936975	1	IRF5
1.67019e-05	0.0111449	1	1	0.00967041	1	HSF2
2.39151e-05	0.0142385	1	1	0.0138468	1	TP63
2.53283e-05	0.0119444	1	1	0.0146651	1	SREBF2
2.64456e-05	0.00472331	1	1	0.015312	1	TEAD3
2.89286e-05	0.0102869	1	1	0.0167496	1	Hand1::Tcf3
4.09557e-05	0.0167998	1	1	0.0237133	1	Pax6
4.79698e-05	0.00570512	1	1	0.0277745	1	RBPJ
7.08003e-05	0.0168344	1	1	0.0409934	1	TBX2
7.1347e-05	0.0105604	1	1	0.0413099	1	HSF1
9.36301e-05	0.00911606	1	1	0.0542118	1	HSF4
0.000115493	0.00826188	1	1	0.0668707	1	SREBF1
0.000120773	0.00445858	1	1	0.0699277	1	MEF2A
0.000128174	0.00634202	1	1	0.0742128	1	GSX1
0.000131222	0.00772331	1	1	0.0759774	1	Phox2b
0.000147026	0.00800252	1	1	0.0851281	1	PPARG
0.00015678	0.00756553	1	1	0.0907754	1	EVX2
0.00017499	0.0330936	1	1	0.101319	1	HOXC11
0.000178353	0.00582449	1	1	0.103267	1	PAX4
0.000181612	0.0137267	1	1	0.105153	1	NFIC::TLX1
0.000203609	0.0100884	1	1	0.11789	1	LHX6
0.00023361	0.0125693	1	1	0.13526	1	Npas2
0.000248959	0.00694529	1	1	0.144147	1	PPARA::RXRA
0.000252221	0.0112592	1	1	0.146036	1	GSC
0.000255101	0.00978596	1	1	0.147703	1	GBX1
0.000263161	0.000947217	1	1	0.15237	1	ASCL1
0.000265017	0.0116845	1	1	0.153445	1	RUNX2
0.000596883	0.0115376	1	1	0.345595	1	Rarb(var.2)
0.000716158	0.0172099	1	1	0.414655	1	SCRT2
0.00105577	0.0046691	1	1	0.611294	1	Sox17
0.00114602	0.00510144	1	1	0.663548	1	LMX1A
0.00124184	0.00409891	1	1	0.719023	1	HOXA5
0.00130869	0.00491872	1	1	0.757734	1	TCF7L2
0.00136504	0.0114336	1	1	0.790361	1	FOXH1
0.00225013	0.0152751	1	1	1	1	OLIG2
0.00225013	0.0152751	1	1	1	1	OLIG1
0.00267205	0.00526128	1	1	1	1	FOXD1
0.00273718	0.0122443	1	1	1	1	Neurog1
0.00303084	0.00743246	1	1	1	1	NR4A1
0.00306064	0.00806649	1	1	1	1	POU6F1
0.00347095	0.00518294	1	1	1	1	HOXA13
0.00353349	0.0110399	1	1	1	1	CLOCK
0.00365361	0.0182277	1	1	1	1	HOXD12
0.00373785	0.00595001	1	1	1	1	NFIC
0.00374527	0.0107678	1	1	1	1	TBR1
0.00504882	0.0103477	1	1	1	1	GSC2
0.00588832	0.00839222	1	1	1	1	ESR1
0.007882	0.00807788	1	1	1	1	LHX2
0.00971596	0.00394342	1	1	1	1	HNF4G
0.00977723	0.00924108	1	1	1	1	Ddit3::Cebpa
0	0.272429	1	1	0	2	GATA1::TAL1
0	0.184038	1	1	0	2	Gata4
0	0.175167	1	1	0	2	GATA5
0	0.175167	1	1	0	2	GATA3
0	0.15696	1	1	0	2	GATA2
0	0.150403	1	1	0	2	GATA6
6.0861e-304	0.116695	1	1	3.52385e-301	2	Gata1
8.4691e-117	0.0246678	1	1	4.90361e-114	2	Sox5
1.59392e-115	0.0295799	1	1	9.22877e-113	2	FOXG1
1.59392e-115	0.0295799	1	1	9.22877e-113	2	Foxj2
2.57352e-113	0.038545	1	1	1.49007e-110	2	Mecom
2.76783e-108	0.0282478	1	1	1.60257e-105	2	Hoxd8
3.12309e-106	0.0326078	1	1	1.80827e-103	2	Arid3b
6.37619e-106	0.0282477	1	1	3.69181e-103	2	Dlx2
8.05991e-102	0.0291886	1	1	4.66669e-99	2	POU4F3
3.86568e-101	0.0292677	1	1	2.23823e-98	2	NKX6-1
4.21225e-101	0.018617	1	1	2.43889e-98	2	FOXL1
4.21225e-101	0.018617	1	1	2.43889e-98	2	FOXP3
4.70684e-99	0.0189369	1	1	2.72526e-96	2	FOXD2
2.24497e-95	0.0279453	1	1	1.29983e-92	2	HNF1A
3.93776e-93	0.0391214	1	1	2.27996e-90	2	Phox2b
2.5447e-92	0.0284771	1	1	1.47338e-89	2	VAX1
2.5447e-92	0.0284771	1	1	1.47338e-89	2	VAX2
2.68083e-89	0.0378812	1	1	1.5522e-86	2	PHOX2A
7.07066e-89	0.0399144	1	1	4.09391e-86	2	PROP1
1.36469e-86	0.0234405	1	1	7.90156e-84	2	Dlx4
4.40984e-86	0.0285636	1	1	2.55329e-83	2	VSX2
4.56169e-86	0.0240376	1	1	2.64122e-83	2	Hmx3
6.45815e-85	0.0280061	1	1	3.73927e-82	2	VSX1
4.22235e-84	0.0388352	1	1	2.44474e-81	2	HNF1B
4.6251e-82	0.0788048	1	1	2.67793e-79	2	CUX2
4.13782e-79	0.0313023	1	1	2.3958e-76	2	POU3F1
4.72545e-78	0.0348252	1	1	2.73604e-75	2	POU3F2
1.38953e-76	0.0224529	1	1	8.04535e-74	2	Dlx3
2.33669e-75	0.0236653	1	1	1.35294e-72	2	PDX1
8.78171e-75	0.0232905	1	1	5.08461e-72	2	DLX6
6.84856e-73	0.0360198	1	1	3.96532e-70	2	LEF1
3.72321e-72	0.0369533	1	1	2.15574e-69	2	DUXA
1.12742e-71	0.0223708	1	1	6.52776e-69	2	Hmx2
1.76281e-71	0.0329973	1	1	1.02067e-68	2	HLTF
7.30721e-70	0.0287714	1	1	4.23087e-67	2	Pou5f1::Sox2
2.60538e-69	0.0258158	1	1	1.50852e-66	2	Hoxd3
7.37321e-68	0.0262322	1	1	4.26909e-65	2	Pou2f3
1.10079e-65	0.0334222	1	1	6.37355e-63	2	LBX1
4.34964e-65	0.0333984	1	1	2.51844e-62	2	HOXD13
3.07951e-64	0.0367998	1	1	1.78303e-61	2	MEOX2
1.4828e-63	0.0235202	1	1	8.58539e-61	2	Arid5a
1.42519e-62	0.0255061	1	1	8.25184e-60	2	Lhx3
7.04635e-61	0.0267615	1	1	4.07984e-58	2	POU3F3
7.55099e-61	0.0184263	1	1	4.37202e-58	2	FOXI1
7.55099e-61	0.0184263	1	1	4.37202e-58	2	FOXO4
7.55099e-61	0.0184263	1	1	4.37202e-58	2	FOXO6
1.1645e-60	0.0195448	1	1	6.74247e-58	2	ONECUT3
1.46542e-60	0.0300666	1	1	8.48479e-58	2	EVX2
6.83788e-60	0.0279445	1	1	3.95913e-57	2	POU4F2
2.16819e-57	0.0275078	1	1	1.25538e-54	2	PAX4
2.388e-57	0.0259805	1	1	1.38265e-54	2	Alx1
3.2085e-57	0.0220863	1	1	1.85772e-54	2	POU4F1
3.97855e-56	0.025866	1	1	2.30358e-53	2	FOXO3
4.13347e-55	0.0129829	1	1	2.39328e-52	2	Foxd3
1.15008e-52	0.021995	1	1	6.65895e-50	2	Lhx4
1.70081e-52	0.0221515	1	1	9.84768e-50	2	Lhx8
4.28227e-52	0.0257776	1	1	2.47943e-49	2	Arx
6.35652e-52	0.0231016	1	1	3.68042e-49	2	LMX1A
2.18187e-51	0.0241466	1	1	1.2633e-48	2	Hoxd9
8.08612e-51	0.0172075	1	1	4.68186e-48	2	FOXC2
1.03024e-50	0.0240498	1	1	5.96511e-48	2	TBP
2.00108e-50	0.0182786	1	1	1.15863e-47	2	HOXA5
2.68508e-49	0.0116968	1	1	1.55466e-46	2	Foxj3
4.23306e-49	0.0635017	1	1	2.45094e-46	2	CUX1
5.25376e-49	0.023708	1	1	3.04193e-46	2	Hmx1
1.24277e-48	0.0366068	1	1	7.19565e-46	2	HOXB13
1.38348e-48	0.0187042	1	1	8.01036e-46	2	Msx3
9.22204e-48	0.0167899	1	1	5.33956e-45	2	NKX6-2
2.76043e-45	0.030487	1	1	1.59829e-42	2	NFATC3
5.28372e-45	0.034142	1	1	3.05928e-42	2	POU3F4
5.28372e-45	0.034142	1	1	3.05928e-42	2	POU5F1B
1.14158e-44	0.0164262	1	1	6.60975e-42	2	SHOX
1.14158e-44	0.0164262	1	1	6.60975e-42	2	Prrx2
1.14158e-44	0.0164262	1	1	6.60975e-42	2	LHX9
1.14158e-44	0.0164262	1	1	6.60975e-42	2	PRRX1
1.14158e-44	0.0164262	1	1	6.60975e-42	2	RAX2
1.14158e-44	0.0164262	1	1	6.60975e-42	2	UNCX
5.97269e-44	0.0241324	1	1	3.45819e-41	2	MNX1
1.62563e-43	0.0288807	1	1	9.41238e-41	2	NFATC1
3.5761e-43	0.0367563	1	1	2.07056e-40	2	TBX19
6.55301e-43	0.0174027	1	1	3.79419e-40	2	FOXA1
1.58156e-42	0.0240797	1	1	9.15724e-40	2	FOXK1
2.11988e-42	0.0222108	1	1	1.22741e-39	2	POU2F2
7.89297e-41	0.037535	1	1	4.57003e-38	2	VENTX
1.81879e-40	0.0249277	1	1	1.05308e-37	2	FOXK2
4.39245e-40	0.0227817	1	1	2.54323e-37	2	HOXA13
4.70621e-40	0.022228	1	1	2.72489e-37	2	POU2F1
3.67495e-39	0.0229043	1	1	2.12779e-36	2	Alx4
9.2732e-39	0.0141304	1	1	5.36918e-36	2	BSX
3.08786e-38	0.0269361	1	1	1.78787e-35	2	EVX1
4.6672e-38	0.0358467	1	1	2.70231e-35	2	TCF7L1
4.20287e-37	0.0215219	1	1	2.43346e-34	2	Hoxb5
5.82853e-37	0.0245692	1	1	3.37472e-34	2	Dmbx1
9.11853e-37	0.019092	1	1	5.27963e-34	2	FOXF2
1.87819e-36	0.0248312	1	1	1.08747e-33	2	Foxa2
2.28372e-36	0.0205779	1	1	1.32227e-33	2	Foxq1
3.89177e-36	0.0227158	1	1	2.25334e-33	2	FOXD1
7.04707e-36	0.0337353	1	1	4.08025e-33	2	Tcf7
1.13112e-35	0.0157547	1	1	6.54917e-33	2	MSX1
5.23587e-35	0.02636	1	1	3.03157e-32	2	TCF7L2
8.7281e-35	0.0185754	1	1	5.05357e-32	2	POU1F1
1.00923e-34	0.0235756	1	1	5.84345e-32	2	NFAT5
2.36837e-34	0.0676484	1	1	1.37128e-31	2	HOXC13
3.08754e-34	0.0155574	1	1	1.78769e-31	2	ISX
3.08754e-34	0.0155574	1	1	1.78769e-31	2	Shox2
8.75503e-34	0.0152775	1	1	5.06916e-31	2	EN1
3.06601e-33	0.0160673	1	1	1.77522e-30	2	LMX1B
8.48163e-33	0.0219726	1	1	4.91086e-30	2	POU5F1
1.31886e-32	0.0205214	1	1	7.63619e-30	2	HOXB3
1.92045e-32	0.039349	1	1	1.11194e-29	2	GSC2
5.05477e-32	0.0420361	1	1	2.92671e-29	2	TP73
3.47124e-31	0.015519	1	1	2.00985e-28	2	ONECUT1
5.51458e-31	0.0147316	1	1	3.19294e-28	2	BARX1
8.86213e-30	0.0156556	1	1	5.13117e-27	2	OTX1
1.60915e-29	0.0185508	1	1	9.317e-27	2	GSX1
1.77978e-29	0.0201138	1	1	1.03049e-26	2	mix-a
4.96762e-29	0.0333331	1	1	2.87625e-26	2	NKX2-3
3.699e-28	0.0214394	1	1	2.14172e-25	2	GBX2
4.79666e-28	0.0138098	1	1	2.77727e-25	2	ONECUT2
9.16344e-28	0.0150091	1	1	5.30563e-25	2	OTX2
2.00186e-27	0.0264113	1	1	1.15908e-24	2	SRY
3.36873e-27	0.0242078	1	1	1.9505e-24	2	ELK4
5.51832e-27	0.0200268	1	1	3.19511e-24	2	NKX2-8
6.20778e-27	0.0327587	1	1	3.5943e-24	2	LHX2
1.01945e-25	0.0115767	1	1	5.90262e-23	2	Arid3a
1.04297e-25	0.0166233	1	1	6.0388e-23	2	FOXB1
2.05174e-25	0.0154751	1	1	1.18796e-22	2	HOXA10
1.06297e-24	0.0242467	1	1	6.15462e-22	2	Rhox11
1.57865e-24	0.0182358	1	1	9.14036e-22	2	HOXB2
2.81686e-24	0.0243841	1	1	1.63096e-21	2	Nr2e1
2.89309e-24	0.0282341	1	1	1.6751e-21	2	SIX2
1.32402e-23	0.0392123	1	1	7.66609e-21	2	BHLHE23
1.50137e-23	0.0271416	1	1	8.69295e-21	2	ETV5
1.96515e-23	0.0271503	1	1	1.13782e-20	2	POU6F1
4.59176e-23	0.0299038	1	1	2.65863e-20	2	ETV4
4.59176e-23	0.0299038	1	1	2.65863e-20	2	FEV
5.63277e-23	0.03002	1	1	3.26137e-20	2	ELK3
5.63277e-23	0.03002	1	1	3.26137e-20	2	ERF
5.63277e-23	0.03002	1	1	3.26137e-20	2	ETV1
5.63277e-23	0.03002	1	1	3.26137e-20	2	ETV3
5.63277e-23	0.03002	1	1	3.26137e-20	2	ELK1
3.9125e-22	0.0296407	1	1	2.26534e-19	2	ETS1
5.99361e-22	0.0157514	1	1	3.4703e-19	2	GSX2
7.71541e-22	0.0186844	1	1	4.46722e-19	2	ZBTB7A
4.89338e-21	0.0273637	1	1	2.83327e-18	2	PAX3
5.15842e-21	0.0274148	1	1	2.98673e-18	2	MEOX1
7.32656e-21	0.0140162	1	1	4.24208e-18	2	CDX1
8.13315e-21	0.0601227	1	1	4.70909e-18	2	HOXD11
1.17641e-20	0.0109701	1	1	6.81144e-18	2	SOX15
1.30576e-20	0.00963926	1	1	7.56035e-18	2	Nkx2-5
2.63851e-20	0.0178661	1	1	1.5277e-17	2	MIXL1
5.25938e-20	0.0270392	1	1	3.04518e-17	2	SOX4
2.20917e-19	0.0270314	1	1	1.27911e-16	2	FLI1
2.20917e-19	0.0270314	1	1	1.27911e-16	2	ERG
7.36271e-19	0.0116311	1	1	4.26301e-16	2	FOXC1
8.60646e-19	0.0293366	1	1	4.98314e-16	2	SOX8
9.91324e-19	0.0195682	1	1	5.73977e-16	2	GRHL2
1.07276e-18	0.0176081	1	1	6.21126e-16	2	RAX
2.24409e-18	0.0296586	1	1	1.29933e-15	2	E2F3
6.9495e-18	0.0198063	1	1	4.02376e-15	2	FOXP1
1.84052e-17	0.0261717	1	1	1.06566e-14	2	Rarg
4.27538e-17	0.0279699	1	1	2.47544e-14	2	Six3
6.96392e-17	0.0207243	1	1	4.03211e-14	2	Barhl1
1.11166e-16	0.0102912	1	1	6.43649e-14	2	Dux
1.6558e-16	0.0221096	1	1	9.58709e-14	2	DUX4
3.92419e-16	0.0156997	1	1	2.27211e-13	2	Dlx1
1.27401e-15	0.0193295	1	1	7.37649e-13	2	NKX3-2
5.2448e-15	0.0150647	1	1	3.03674e-12	2	CDX2
1.48383e-14	0.0182968	1	1	8.5914e-12	2	Bhlha15
3.30484e-14	0.018454	1	1	1.9135e-11	2	Nkx3-1
4.16952e-14	0.0194408	1	1	2.41415e-11	2	Sox1
9.46785e-13	0.0180226	1	1	5.48188e-10	2	Sox11
1.30656e-12	0.017004	1	1	7.56498e-10	2	MAFF
4.65174e-12	0.0275477	1	1	2.69336e-09	2	Atoh1
5.6707e-12	0.0129156	1	1	3.28333e-09	2	HESX1
6.64491e-12	0.0551949	1	1	3.84741e-09	2	PROX1
1.199e-11	0.0151051	1	1	6.94221e-09	2	EMX1
1.32378e-11	0.014677	1	1	7.6647e-09	2	EMX2
1.65205e-11	0.0257201	1	1	9.56537e-09	2	RARA(var.2)
1.77314e-11	0.00979343	1	1	1.02665e-08	2	Nobox
1.78995e-11	0.0161312	1	1	1.03638e-08	2	HINFP
1.79854e-11	0.0122617	1	1	1.04135e-08	2	Gabpa
2.07919e-11	0.0203353	1	1	1.20385e-08	2	HOXC10
2.97796e-11	0.0123503	1	1	1.72424e-08	2	PPARA::RXRA
3.17132e-11	0.00526858	1	1	1.83619e-08	2	ZNF384
5.09132e-11	0.0422455	1	1	2.94788e-08	2	MYBL2
5.80433e-11	0.0651169	1	1	3.36071e-08	2	YY2
7.25877e-11	0.0198119	1	1	4.20283e-08	2	ETV6
9.77564e-11	0.0120144	1	1	5.6601e-08	2	ESX1
3.73083e-10	0.0168429	1	1	2.16015e-07	2	BARHL2
4.88563e-10	0.0104038	1	1	2.82878e-07	2	SOX10
5.01347e-10	0.0320465	1	1	2.9028e-07	2	ETV2
8.33049e-10	0.00709617	1	1	4.82336e-07	2	Pitx1
8.62128e-10	0.0256913	1	1	4.99172e-07	2	PAX7
1.25661e-09	0.0166394	1	1	7.27578e-07	2	EN2
1.52515e-09	0.0127018	1	1	8.8306e-07	2	LBX2
1.65202e-09	0.0268384	1	1	9.56518e-07	2	Mafb
1.92165e-09	0.0167633	1	1	1.11264e-06	2	MAFG
4.48667e-09	0.0157606	1	1	2.59778e-06	2	LHX6
7.09578e-09	0.0187515	1	1	4.10846e-06	2	Rarb
8.27635e-09	0.0108841	1	1	4.79201e-06	2	FOXP2
1.01476e-08	0.0118605	1	1	5.87543e-06	2	HOXA2
1.50473e-08	0.0162318	1	1	8.71239e-06	2	ZBTB33
2.28159e-08	0.0202091	1	1	1.32104e-05	2	ZNF410
2.73577e-08	0.00753726	1	1	1.58401e-05	2	NRF1
3.12275e-08	0.0150979	1	1	1.80807e-05	2	Crx
9.64143e-08	0.017178	1	1	5.58239e-05	2	BCL6B
2.0695e-07	0.0128517	1	1	0.000119824	2	SOX21
2.541e-07	0.0191224	1	1	0.000147124	2	Hnf4a
2.81291e-07	0.0157843	1	1	0.000162868	2	POU6F2
5.08393e-07	0.0253182	1	1	0.00029436	2	T
5.1223e-07	0.0237859	1	1	0.000296581	2	GRHL1
5.18787e-07	0.00846726	1	1	0.000300378	2	YY1
5.23421e-07	0.0239236	1	1	0.000303061	2	Ddit3::Cebpa
6.12257e-07	0.00800597	1	1	0.000354497	2	Tcfl5
6.16153e-07	0.00879819	1	1	0.000356753	2	Stat4
6.88535e-07	0.0115816	1	1	0.000398662	2	TFAP2C(var.2)
1.27964e-06	0.0135886	1	1	0.000740912	2	RORA(var.2)
1.60913e-06	0.00924957	1	1	0.000931684	2	NFIX
1.65279e-06	0.0110924	1	1	0.000956967	2	NOTO
3.11392e-06	0.00895716	1	1	0.00180296	2	ALX3
3.33793e-06	0.00974672	1	1	0.00193266	2	TEAD4
3.39801e-06	0.0201835	1	1	0.00196745	2	Rarb(var.2)
4.00885e-06	0.0208851	1	1	0.00232112	2	EHF
5.5075e-06	0.0071292	1	1	0.00318884	2	LIN54
5.70429e-06	0.0180027	1	1	0.00330279	2	ELF1
6.42667e-06	0.0206159	1	1	0.00372104	2	NRL
7.08388e-06	0.014783	1	1	0.00410157	2	NR1H2::RXRA
9.79654e-06	0.0170244	1	1	0.0056722	2	Twist2
5.56168e-05	0.0048968	1	1	0.0322021	2	TEAD3
5.84214e-05	0.010802	1	1	0.033826	2	HMBOX1
9.28255e-05	0.0150608	1	1	0.053746	2	NEUROD2
0.000178214	0.0171584	1	1	0.103186	2	BHLHE22
0.000199561	0.0127577	1	1	0.115546	2	Nr2f6(var.2)
0.000345987	0.0103078	1	1	0.200326	2	TEF
0.00037683	0.0106478	1	1	0.218184	2	DBP
0.000550469	0.00361495	1	1	0.318722	2	NFATC2
0.000804494	0.00428319	1	1	0.465802	2	RHOXF1
0.00102303	0.0118913	1	1	0.592336	2	ELF4
0.00122531	0.018921	1	1	0.709454	2	NEUROG2
0.00176221	0.00446349	1	1	1	2	Gmeb1
0.00186295	0.0120497	1	1	1	2	Neurog1
0.001976	0.00971947	1	1	1	2	EOMES
0.00297854	0.0297394	1	1	1	2	E2F1
0.00540466	0.00710683	1	1	1	2	HLF
0.00852914	0.0102984	1	1	1	2	RORA
0.00927188	0.0100204	1	1	1	2	RUNX2
0.00929123	0.0127571	1	1	1	2	E2F8
0	0.0858316	1	1	0	3	KLF14
0	0.0666593	1	1	0	3	Zfx
0	0.052847	1	1	0	3	SP2
3.38796e-306	0.0663328	1	1	1.96163e-303	3	KLF5
8.27919e-302	0.0799181	1	1	4.79365e-299	3	Tcfl5
3.35554e-298	0.0737735	1	1	1.94286e-295	3	SP4
6.24442e-298	0.0525407	1	1	3.61552e-295	3	SP1
9.36236e-294	0.0688075	1	1	5.42081e-291	3	KLF16
8.20171e-289	0.0719539	1	1	4.74879e-286	3	SP8
8.34502e-286	0.0647065	1	1	4.83177e-283	3	SP3
4.10573e-279	0.0971245	1	1	2.37722e-276	3	ZBTB7A
3.55714e-269	0.0762779	1	1	2.05958e-266	3	EGR3
7.68044e-268	0.0742113	1	1	4.44697e-265	3	ZIC3
1.0324e-266	0.103104	1	1	5.9776e-264	3	ELK4
2.48633e-261	0.0939551	1	1	1.43959e-258	3	NRF1
5.3942e-256	0.0740125	1	1	3.12324e-253	3	EGR4
1.56039e-246	0.191986	1	1	9.03468e-244	3	GATA1::TAL1
3.02411e-246	0.0305551	1	1	1.75096e-243	3	Ahr::Arnt
8.88069e-245	0.0801925	1	1	5.14192e-242	3	Klf12
1.8143e-243	0.116078	1	1	1.05048e-240	3	GATA5
1.8143e-243	0.116078	1	1	1.05048e-240	3	GATA3
1.15202e-241	0.0622998	1	1	6.67019e-239	3	E2F6
1.74918e-241	0.0690557	1	1	1.01278e-238	3	ZIC4
2.68585e-241	0.0580536	1	1	1.55511e-238	3	CTCFL
5.62506e-233	0.0635139	1	1	3.25691e-230	3	Gmeb1
7.21327e-231	0.0922707	1	1	4.17648e-228	3	Gabpa
7.81514e-231	0.0636286	1	1	4.52497e-228	3	TFAP2A(var.2)
2.32318e-212	0.0594466	1	1	1.34512e-209	3	E2F4
2.52218e-195	0.0719551	1	1	1.46034e-192	3	GLIS2
1.74705e-194	0.0502894	1	1	1.01154e-191	3	CTCF
1.02224e-189	0.0784266	1	1	5.91874e-187	3	HINFP
9.73252e-187	0.0741356	1	1	5.63513e-184	3	KLF13
7.53181e-184	0.0619699	1	1	4.36092e-181	3	INSM1
2.42284e-178	0.0504351	1	1	1.40282e-175	3	PLAG1
2.18943e-177	0.05473	1	1	1.26768e-174	3	REST
4.9709e-177	0.0593705	1	1	2.87815e-174	3	TFAP2A
2.83466e-172	0.0520284	1	1	1.64127e-169	3	KLF9
3.185e-171	0.0906245	1	1	1.84411e-168	3	YY1
1.70219e-170	0.0589716	1	1	9.85566e-168	3	ZIC1
2.21353e-170	0.0628097	1	1	1.28163e-167	3	Hes1
1.47911e-167	0.0955708	1	1	8.56403e-165	3	ETV5
7.49125e-156	0.0503149	1	1	4.33743e-153	3	TFAP2A(var.3)
5.7947e-155	0.114505	1	1	3.35513e-152	3	Gata4
3.04837e-154	0.0527261	1	1	1.765e-151	3	TFDP1
4.31783e-138	0.0478441	1	1	2.50002e-135	3	TFAP2C(var.3)
1.23343e-135	0.0736877	1	1	7.14153e-133	3	ZBTB7C
3.47616e-134	0.0459824	1	1	2.0127e-131	3	TFAP2C
5.43484e-133	0.0465332	1	1	3.14677e-130	3	TFAP2B
4.54972e-129	0.0577555	1	1	2.63429e-126	3	USF2
1.86923e-128	0.0881184	1	1	1.08228e-125	3	ETV4
1.86923e-128	0.0881184	1	1	1.08228e-125	3	FEV
1.26979e-125	0.0710636	1	1	7.3521e-123	3	ZBTB33
2.82743e-124	0.0805041	1	1	1.63708e-121	3	GATA2
4.85769e-123	0.0865651	1	1	2.8126e-120	3	ETS1
5.87294e-123	0.0435637	1	1	3.40043e-120	3	RARA::RXRG
4.12888e-121	0.0848066	1	1	2.39062e-118	3	FLI1
4.12888e-121	0.0848066	1	1	2.39062e-118	3	ERG
3.64676e-119	0.087814	1	1	2.11147e-116	3	ELK3
3.64676e-119	0.087814	1	1	2.11147e-116	3	ERF
3.64676e-119	0.087814	1	1	2.11147e-116	3	ETV1
3.64676e-119	0.087814	1	1	2.11147e-116	3	ETV3
3.64676e-119	0.087814	1	1	2.11147e-116	3	ELK1
1.39555e-118	0.0433641	1	1	8.08022e-116	3	TFAP2B(var.3)
5.93003e-112	0.0659773	1	1	3.43349e-109	3	EGR1
2.07448e-111	0.0579854	1	1	1.20112e-108	3	TFAP2B(var.2)
2.766e-105	0.0589245	1	1	1.60151e-102	3	TFAP2C(var.2)
2.49043e-100	0.0627247	1	1	1.44196e-97	3	EGR2
1.95057e-98	0.0603037	1	1	1.12938e-95	3	TFEB
2.13061e-94	0.0198084	1	1	1.23362e-91	3	RREB1
2.10302e-89	0.0388684	1	1	1.21765e-86	3	NR2C2
1.14139e-83	0.0642781	1	1	6.60863e-81	3	ETV6
1.61412e-83	0.0596063	1	1	9.34575e-81	3	GATA6
5.04075e-82	0.0290417	1	1	2.91859e-79	3	ARNT::HIF1A
5.91184e-81	0.031104	1	1	3.42295e-78	3	ZNF740
1.72071e-80	0.0553748	1	1	9.9629e-78	3	Gata1
1.01888e-77	0.0691479	1	1	5.89934e-75	3	BHLHE41
1.27777e-77	0.0434521	1	1	7.39831e-75	3	MXI1
5.28819e-76	0.0637749	1	1	3.06186e-73	3	JUNB(var.2)
4.26326e-71	0.0344215	1	1	2.46843e-68	3	ZEB1
1.07283e-70	0.0624605	1	1	6.21171e-68	3	FOSL1::JUND(var.2)
5.14224e-69	0.0227653	1	1	2.97736e-66	3	Id2
2.15253e-65	0.0258361	1	1	1.24631e-62	3	TFE3
9.48036e-62	0.0213006	1	1	5.48913e-59	3	Mlxip
5.17256e-52	0.0533681	1	1	2.99491e-49	3	GLIS1
7.64488e-52	0.0594463	1	1	4.42639e-49	3	CREB1
2.95578e-51	0.0479711	1	1	1.7114e-48	3	MYCN
9.6315e-51	0.055126	1	1	5.57664e-48	3	PAX5
3.51403e-50	0.0125418	1	1	2.03462e-47	3	ZNF263
5.1346e-50	0.046027	1	1	2.97293e-47	3	TFEC
2.85711e-49	0.0314285	1	1	1.65427e-46	3	Klf1
3.65649e-49	0.0677919	1	1	2.11711e-46	3	ELF1
7.8473e-42	0.0636963	1	1	4.54359e-39	3	ELF4
2.5625e-41	0.0320921	1	1	1.48369e-38	3	Atf1
2.01781e-40	0.0115083	1	1	1.16831e-37	3	Arnt
2.26719e-37	0.021002	1	1	1.3127e-34	3	Znf423
2.74844e-36	0.0452875	1	1	1.59135e-33	3	BHLHE40
4.83274e-34	0.0550204	1	1	2.79816e-31	3	ATF7
6.58359e-32	0.0560313	1	1	3.8119e-29	3	ELF3
3.47878e-31	0.0571134	1	1	2.01422e-28	3	MLX
3.47878e-31	0.0571134	1	1	2.01422e-28	3	MLXIPL
3.47878e-31	0.0571134	1	1	2.01422e-28	3	SREBF2(var.2)
3.47878e-31	0.0571134	1	1	2.01422e-28	3	Srebf1(var.2)
7.12795e-30	0.0259138	1	1	4.12708e-27	3	Atf3
8.81362e-30	0.0143113	1	1	5.10308e-27	3	THAP1
1.07962e-29	0.0321053	1	1	6.25097e-27	3	MITF
2.06334e-29	0.013785	1	1	1.19467e-26	3	HIC2
2.15919e-29	0.0269252	1	1	1.25017e-26	3	MYC
3.13206e-28	0.0329325	1	1	1.81347e-25	3	USF1
1.71067e-27	0.043559	1	1	9.90479e-25	3	FOSB::JUNB(var.2)
2.69093e-27	0.0121176	1	1	1.55805e-24	3	RHOXF1
1.6557e-26	0.0395067	1	1	9.58651e-24	3	Crem
3.3452e-24	0.0480079	1	1	1.93687e-21	3	JUN::JUNB(var.2)
2.19241e-23	0.0477535	1	1	1.2694e-20	3	EHF
2.53843e-22	0.0328033	1	1	1.46975e-19	3	RXRB
5.44549e-22	0.0276897	1	1	3.15294e-19	3	NFYA
4.31707e-21	0.0357316	1	1	2.49958e-18	3	GLIS3
8.8101e-21	0.0214608	1	1	5.10105e-18	3	NFYB
1.14577e-20	0.0095683	1	1	6.63404e-18	3	VDR
1.95863e-20	0.0373025	1	1	1.13404e-17	3	CUX2
3.13912e-20	0.0330202	1	1	1.81755e-17	3	ZNF143
6.31823e-20	0.0275928	1	1	3.65826e-17	3	Nr2f6
6.94884e-20	0.0252081	1	1	4.02338e-17	3	FOSL2::JUND(var.2)
7.02141e-20	0.030494	1	1	4.0654e-17	3	RXRG
1.0378e-18	0.0499141	1	1	6.00885e-16	3	CENPB
4.88514e-18	0.0201839	1	1	2.8285e-15	3	POU3F4
4.88514e-18	0.0201839	1	1	2.8285e-15	3	POU5F1B
6.25668e-18	0.0386674	1	1	3.62262e-15	3	ZBTB7B
7.07091e-18	0.0594327	1	1	4.09406e-15	3	FOSB::JUN
5.17604e-17	0.0479317	1	1	2.99693e-14	3	E2F8
7.65359e-17	0.0198383	1	1	4.43143e-14	3	NHLH1
1.19081e-16	0.0311364	1	1	6.89476e-14	3	GLI2
1.41764e-16	0.0406277	1	1	8.20814e-14	3	HOXC13
1.51304e-16	0.0126461	1	1	8.76049e-14	3	Myog
1.91514e-16	0.00955817	1	1	1.10886e-13	3	Pitx1
8.80312e-16	0.0149995	1	1	5.09701e-13	3	Tcf12
9.85905e-16	0.0837777	1	1	5.70839e-13	3	E2F1
3.94312e-15	0.0177266	1	1	2.28307e-12	3	TCF4
6.09147e-15	0.0255249	1	1	3.52696e-12	3	Rxra
6.16932e-15	0.0192331	1	1	3.57203e-12	3	RARA::RXRA
1.81089e-14	0.0313346	1	1	1.04851e-11	3	RARA(var.2)
2.11283e-14	0.0356982	1	1	1.22333e-11	3	JDP2(var.2)
1.51902e-13	0.0692942	1	1	8.79515e-11	3	YY2
8.44596e-13	0.0309312	1	1	4.89021e-10	3	FOSL2::JUNB(var.2)
2.01662e-12	0.0224211	1	1	1.16762e-09	3	HIF1A
1.50775e-11	0.0292037	1	1	8.72986e-09	3	GCM2
6.88809e-11	0.0240609	1	1	3.9882e-08	3	ZNF282
1.47106e-09	0.00946549	1	1	8.51745e-07	3	MZF1(var.2)
2.00166e-09	0.0159108	1	1	1.15896e-06	3	MAX
2.11504e-09	0.00693174	1	1	1.22461e-06	3	NR4A2
1.17054e-08	0.0204619	1	1	6.77743e-06	3	Hes2
2.66122e-08	0.0219705	1	1	1.54085e-05	3	Hnf4a
4.52586e-08	0.0328556	1	1	2.62048e-05	3	HOXD11
5.29086e-08	0.0138449	1	1	3.06341e-05	3	NFKB2
6.61992e-08	0.0111176	1	1	3.83293e-05	3	NFIA
7.08601e-08	0.0230536	1	1	4.1028e-05	3	FOSL2::JUN(var.2)
2.81324e-07	0.0104878	1	1	0.000162887	3	KLF4
1.16496e-06	0.0078535	1	1	0.000674515	3	FOXO3
2.94308e-06	0.0154392	1	1	0.00170405	3	Rarg
3.7019e-06	0.0188337	1	1	0.0021434	3	CUX1
4.63625e-06	0.00950855	1	1	0.00268439	3	NR2F1
5.34348e-06	0.0252502	1	1	0.00309387	3	MYBL2
6.19172e-06	0.0321579	1	1	0.00358501	3	SPDEF
3.97722e-05	0.0102489	1	1	0.0230281	3	TCF7L1
5.3337e-05	0.0107313	1	1	0.0308821	3	Arntl
5.53984e-05	0.00918897	1	1	0.0320757	3	MNT
0.000189085	0.00720342	1	1	0.10948	3	TCF3
0.000203793	0.00499972	1	1	0.117996	3	OTX2
0.000203858	0.00931108	1	1	0.118034	3	HOXB13
0.000225194	0.0156848	1	1	0.130387	3	Creb5
0.000626181	0.0237222	1	0.999	0.362559	3	GCM1
0.000870244	0.0321374	0.999	1	0.503871	3	ZBED1
0.00234952	0.00282332	1	1	1	3	Pparg::Rxra
0.00290589	0.00872081	1	1	1	3	TP73
0.0029786	0.00458006	1	1	1	3	MEIS2
0.00429726	0.00499866	1	1	1	3	RFX4
0.00476506	0.00387788	1	1	1	3	OTX1
0.00558581	0.00978214	1	1	1	3	GSC2
0.00727121	0.0078308	1	1	1	3	NR1H2::RXRA
0.00929998	0.00521473	1	1	1	3	PITX3
9.08983e-266	0.102791	1	1	5.26301e-263	4	SPIC
1.7855e-250	0.139242	1	1	1.0338e-247	4	SPI1
5.68987e-228	0.0365545	1	1	3.29444e-225	4	IRF1
2.35983e-188	0.140817	1	1	1.36634e-185	4	CEBPA
1.84795e-184	0.0290381	1	1	1.06996e-181	4	MEF2C
6.28362e-184	0.0275674	1	1	3.63821e-181	4	Foxj3
5.76826e-180	0.110429	1	1	3.33982e-177	4	JUN(var.2)
1.97837e-168	0.0982972	1	1	1.14548e-165	4	RUNX1
2.11689e-163	0.0744317	1	1	1.22568e-160	4	MAFF
9.47143e-156	0.0227419	1	1	5.48396e-153	4	ZNF384
1.31137e-154	0.132745	1	1	7.59283e-152	4	JDP2
1.29911e-152	0.0600661	1	1	7.52185e-150	4	IRF2
1.41709e-149	0.0287928	1	1	8.20493e-147	4	MAFG::NFE2L1
6.07156e-145	0.143656	1	1	3.51543e-142	4	FOS
2.32491e-136	0.0698083	1	1	1.34612e-133	4	JUND(var.2)
1.49098e-133	0.0251257	1	1	8.63276e-131	4	FOXD2
6.82284e-133	0.113696	1	1	3.95042e-130	4	FOSL1::JUND
2.23956e-132	0.0402654	1	1	1.29671e-129	4	STAT1::STAT2
4.36428e-132	0.0465282	1	1	2.52692e-129	4	POU3F3
1.84554e-130	0.0259742	1	1	1.06857e-127	4	Arid3a
3.28108e-129	0.117086	1	1	1.89975e-126	4	FOS::JUN
3.28108e-129	0.117086	1	1	1.89975e-126	4	FOSB::JUNB
3.28108e-129	0.117086	1	1	1.89975e-126	4	FOSL2::JUNB
6.26702e-129	0.113869	1	1	3.6286e-126	4	FOSL1::JUN
8.2427e-129	0.126416	1	1	4.77252e-126	4	FOSL2::JUN
7.59828e-127	0.0296083	1	1	4.3994e-124	4	Sox5
3.3094e-126	0.0876287	1	1	1.91614e-123	4	MAFK
4.99236e-124	0.148004	1	1	2.89058e-121	4	FOSL2::JUND
4.77473e-122	0.133403	1	1	2.76457e-119	4	JUN::JUNB
5.83948e-122	0.0233396	1	1	3.38106e-119	4	FOXL1
5.83948e-122	0.0233396	1	1	3.38106e-119	4	FOXP3
3.02145e-120	0.0448428	1	1	1.74942e-117	4	FOXB1
1.28118e-119	0.0273572	1	1	7.41803e-117	4	SPIB
1.48591e-119	0.0860032	1	1	8.6034e-117	4	FOSL1::JUNB
5.55992e-119	0.117987	1	1	3.21919e-116	4	FOS::JUND
1.35643e-117	0.1295	1	1	7.85371e-115	4	JUND
3.18378e-117	0.137342	1	1	1.84341e-114	4	ATF4
2.83486e-116	0.0435109	1	1	1.64139e-113	4	POU1F1
4.43766e-115	0.108978	1	1	2.5694e-112	4	BATF::JUN
7.50087e-113	0.0471508	1	1	4.343e-110	4	Stat6
8.62636e-112	0.136502	1	1	4.99467e-109	4	FOS::JUNB
1.68137e-111	0.0359495	1	1	9.73512e-109	4	Arid5a
3.14303e-109	0.0423384	1	1	1.81981e-106	4	Hoxb5
7.09358e-107	0.0383842	1	1	4.10718e-104	4	CDX1
1.3538e-106	0.0395033	1	1	7.83848e-104	4	Pou2f3
3.29461e-105	0.0749716	1	1	1.90758e-102	4	JUN
1.31184e-104	0.146834	1	1	7.59553e-102	4	NFE2
1.34898e-104	0.0372766	1	1	7.81061e-102	4	Hoxd3
1.2149e-103	0.0220393	1	1	7.03429e-101	4	Nkx2-5
5.72018e-101	0.0408668	1	1	3.31198e-98	4	TBP
1.09777e-100	0.0319168	1	1	6.35611e-98	4	FOXC1
7.95693e-100	0.0369921	1	1	4.60706e-97	4	IRF3
1.54258e-97	0.0202405	1	1	8.93152e-95	4	Foxd3
2.79773e-97	0.0411775	1	1	1.61988e-94	4	Pou5f1::Sox2
2.93966e-97	0.044377	1	1	1.70206e-94	4	POU3F1
4.62186e-97	0.097846	1	1	2.67606e-94	4	JUNB
1.41817e-96	0.0772356	1	1	8.21122e-94	4	RUNX3
1.90559e-94	0.0347805	1	1	1.10334e-91	4	VSX2
7.94696e-93	0.0436297	1	1	4.60129e-90	4	POU2F2
1.64491e-91	0.0428929	1	1	9.52401e-89	4	POU2F1
1.55453e-90	0.0345491	1	1	9.00074e-88	4	Lhx3
2.01179e-90	0.0956043	1	1	1.16483e-87	4	MAF::NFE2
2.60093e-90	0.0360248	1	1	1.50594e-87	4	LIN54
1.67654e-89	0.0986057	1	1	9.70719e-87	4	FOSL2
1.15041e-88	0.0571982	1	1	6.66087e-86	4	Sox11
1.23299e-87	0.0331049	1	1	7.13903e-85	4	VSX1
8.73212e-87	0.0945937	1	1	5.0559e-84	4	Nfe2l2
8.40882e-86	0.0290791	1	1	4.86871e-83	4	FOXA1
7.93939e-85	0.0646331	1	1	4.59691e-82	4	MAFG
4.3455e-83	0.0326445	1	1	2.51604e-80	4	HOXA10
5.62141e-79	0.0562964	1	1	3.2548e-76	4	SOX21
3.70034e-78	0.0750115	1	1	2.1425e-75	4	FOSL1
5.13096e-78	0.0360259	1	1	2.97082e-75	4	Alx1
3.14161e-77	0.0450841	1	1	1.81899e-74	4	POU3F2
5.43435e-77	0.044325	1	1	3.14649e-74	4	Dlx1
6.19564e-77	0.0566387	1	1	3.58727e-74	4	NFIL3
1.19802e-76	0.0364381	1	1	6.93651e-74	4	Arx
3.47596e-76	0.0265277	1	1	2.01258e-73	4	ONECUT2
4.86345e-76	0.0415355	1	1	2.81594e-73	4	CDX2
3.13146e-75	0.0468966	1	1	1.81312e-72	4	IRF7
2.02448e-72	0.0254931	1	1	1.17217e-69	4	Hmx2
5.35727e-72	0.0677038	1	1	3.10186e-69	4	SOX8
1.53483e-71	0.0361342	1	1	8.88666e-69	4	SOX10
1.4216e-70	0.0409303	1	1	8.23109e-68	4	Dmbx1
1.8533e-70	0.0292074	1	1	1.07306e-67	4	Nobox
1.7412e-69	0.0738948	1	1	1.00816e-66	4	DBP
5.97176e-69	0.0978015	1	1	3.45765e-66	4	PRDM1
8.14771e-69	0.0291627	1	1	4.71752e-66	4	Lhx8
1.16784e-68	0.0328357	1	1	6.76177e-66	4	Hoxd9
1.48568e-68	0.0402021	1	1	8.60209e-66	4	PHOX2A
3.76245e-68	0.0259738	1	1	2.17846e-65	4	BARX1
1.56789e-66	0.0245594	1	1	9.07806e-64	4	EN1
1.94229e-66	0.026823	1	1	1.12458e-63	4	ONECUT1
6.0274e-66	0.02815	1	1	3.48986e-63	4	Lhx4
1.65582e-65	0.0395683	1	1	9.58722e-63	4	Phox2b
2.10092e-65	0.0266509	1	1	1.21643e-62	4	LMX1B
3.7598e-65	0.0143456	1	1	2.17692e-62	4	MEIS1
1.05371e-64	0.0348146	1	1	6.10096e-62	4	Alx4
1.21523e-64	0.086018	1	1	7.03617e-62	4	TP63
5.17373e-64	0.0347187	1	1	2.99559e-61	4	Foxq1
1.26264e-63	0.0511229	1	1	7.31067e-61	4	Sox1
1.36708e-63	0.0607988	1	1	7.91539e-61	4	HLF
3.27673e-63	0.0296344	1	1	1.89723e-60	4	Arid3b
3.42835e-63	0.0704813	1	1	1.98501e-60	4	TEF
4.00784e-63	0.0416518	1	1	2.32054e-60	4	POU5F1
6.0805e-62	0.0272185	1	1	3.52061e-59	4	POU4F1
3.26617e-60	0.0586035	1	1	1.89111e-57	4	SOX4
1.29881e-59	0.0297267	1	1	7.52011e-57	4	GSX2
2.31451e-59	0.0358023	1	1	1.3401e-56	4	HOXA2
3.29674e-59	0.0296084	1	1	1.90881e-56	4	FOXF2
1.73028e-58	0.0327981	1	1	1.00183e-55	4	Mecom
4.88361e-58	0.0301957	1	1	2.82761e-55	4	Hmx1
6.11844e-58	0.079769	1	1	3.54258e-55	4	BACH2
8.57692e-57	0.0384951	1	1	4.96603e-54	4	PROP1
5.36644e-55	0.0393771	1	1	3.10717e-52	4	DUXA
1.82234e-54	0.0271262	1	1	1.05514e-51	4	LMX1A
1.86754e-54	0.0216281	1	1	1.0813e-51	4	Hmx3
3.39067e-54	0.0340771	1	1	1.9632e-51	4	ALX3
1.21238e-53	0.0406401	1	1	7.01965e-51	4	TCF7L2
3.90907e-53	0.0383261	1	1	2.26335e-50	4	EMX1
6.93003e-52	0.064067	1	1	4.01249e-49	4	EOMES
1.24993e-51	0.0222253	1	1	7.23708e-49	4	DLX6
1.90674e-51	0.0220863	1	1	1.104e-48	4	Msx3
3.75664e-51	0.0240177	1	1	2.17509e-48	4	HNF1A
5.97453e-51	0.0827696	1	1	3.45925e-48	4	Mafb
8.572e-51	0.0244991	1	1	4.96319e-48	4	VAX1
8.572e-51	0.0244991	1	1	4.96319e-48	4	VAX2
1.54676e-50	0.0335233	1	1	8.95576e-48	4	HESX1
1.95423e-50	0.0301648	1	1	1.1315e-47	4	mix-a
4.31899e-50	0.0213352	1	1	2.5007e-47	4	ISX
4.31899e-50	0.0213352	1	1	2.5007e-47	4	Shox2
4.35519e-50	0.0585167	1	1	2.52166e-47	4	Hand1::Tcf3
1.20331e-49	0.0620844	1	1	6.96717e-47	4	IRF9
3.0949e-49	0.0290223	1	1	1.79195e-46	4	HOXB2
7.41043e-49	0.0431657	1	1	4.29064e-46	4	Rhox11
7.45397e-49	0.0461403	1	1	4.31585e-46	4	HSF2
7.96537e-49	0.059797	1	1	4.61195e-46	4	Foxo1
7.99454e-49	0.0291319	1	1	4.62884e-46	4	HOXB3
1.087e-48	0.0214089	1	1	6.29374e-46	4	Hoxd8
1.55816e-48	0.0933538	1	1	9.02175e-46	4	BHLHE22
1.1288e-47	0.0533565	1	1	6.53576e-45	4	ELF5
4.95526e-47	0.0324877	1	1	2.8691e-44	4	EVX2
1.73715e-46	0.0385397	1	1	1.00581e-43	4	GRHL2
3.00642e-46	0.0317539	1	1	1.74072e-43	4	GBX2
4.33608e-46	0.0744238	1	1	2.51059e-43	4	NR3C2
7.1578e-46	0.0201707	1	1	4.14437e-43	4	SOX15
2.87723e-45	0.0204426	1	1	1.66592e-42	4	PDX1
8.24647e-45	0.0277236	1	1	4.7747e-42	4	MNX1
9.432e-45	0.0771661	1	1	5.46113e-42	4	IRF8
4.17625e-44	0.0428295	1	1	2.41805e-41	4	Bhlha15
3.18288e-43	0.0343131	1	1	1.84289e-40	4	Bcl6
6.97212e-43	0.039077	1	1	4.03686e-40	4	EMX2
9.53581e-43	0.0285708	1	1	5.52123e-40	4	POU4F2
1.53364e-42	0.0310051	1	1	8.8798e-40	4	FOXP2
4.72343e-42	0.0702754	1	1	2.73486e-39	4	RORB
5.6688e-42	0.0193165	1	1	3.28223e-39	4	MSX1
7.41607e-42	0.0433428	1	1	4.2939e-39	4	SIX2
1.30943e-41	0.0111181	1	1	7.58162e-39	4	NFATC2
1.16266e-40	0.0499875	1	1	6.73178e-38	4	POU6F2
2.42827e-40	0.0185517	1	1	1.40597e-37	4	Dlx3
2.48509e-40	0.0739704	1	1	1.43887e-37	4	NRL
3.62903e-40	0.0217315	1	1	2.10121e-37	4	NKX6-1
5.51882e-40	0.0273633	1	1	3.19539e-37	4	PAX4
2.29562e-39	0.0280201	1	1	1.32916e-36	4	ESX1
2.80726e-39	0.0241337	1	1	1.6254e-36	4	GSX1
2.91245e-39	0.0432058	1	1	1.68631e-36	4	HSF1
4.06793e-39	0.0327831	1	1	2.35533e-36	4	EVX1
4.11018e-39	0.0369144	1	1	2.3798e-36	4	Nr2e1
5.32054e-39	0.0585507	1	1	3.08059e-36	4	DMRT3
6.23345e-39	0.0839901	1	1	3.60917e-36	4	OLIG3
1.05881e-38	0.030259	1	1	6.1305e-36	4	RAX
1.53687e-38	0.0625437	1	1	8.89846e-36	4	BHLHE23
2.14176e-38	0.0292159	1	1	1.24008e-35	4	MIXL1
6.81387e-38	0.0371009	1	1	3.94523e-35	4	SRY
1.47207e-37	0.0312996	1	1	8.52328e-35	4	LEF1
4.5654e-36	0.0281482	1	1	2.64337e-33	4	FOXK2
5.02022e-36	0.0262328	1	1	2.90671e-33	4	HOXA13
1.27771e-35	0.0168725	1	1	7.39795e-33	4	ONECUT3
1.45563e-35	0.0161153	1	1	8.42808e-33	4	SHOX
1.45563e-35	0.0161153	1	1	8.42808e-33	4	Prrx2
1.45563e-35	0.0161153	1	1	8.42808e-33	4	LHX9
1.45563e-35	0.0161153	1	1	8.42808e-33	4	PRRX1
1.45563e-35	0.0161153	1	1	8.42808e-33	4	RAX2
1.45563e-35	0.0161153	1	1	8.42808e-33	4	UNCX
1.80593e-35	0.0544719	1	1	1.04563e-32	4	ZSCAN4
4.7879e-35	0.0152326	1	1	2.77219e-32	4	NKX6-2
1.2131e-34	0.0444663	1	1	7.02387e-32	4	HOXC10
1.56813e-34	0.0170276	1	1	9.07949e-32	4	Dlx4
1.88648e-34	0.078782	1	1	1.09227e-31	4	NEUROD2
3.42011e-32	0.0505838	1	1	1.98025e-29	4	Bach1::Mafk
3.4249e-32	0.0244303	1	1	1.98302e-29	4	FOXK1
5.65469e-32	0.0265905	1	1	3.27407e-29	4	LBX2
1.05501e-31	0.0261328	1	1	6.10848e-29	4	FOXD1
2.38225e-31	0.0264238	1	1	1.37932e-28	4	SOX9
2.68089e-31	0.123349	1	1	1.55224e-28	4	NEUROG2
3.70782e-31	0.0565503	1	1	2.14683e-28	4	ZNF410
3.93995e-31	0.0366787	1	1	2.28123e-28	4	HSF4
6.23786e-31	0.029255	1	1	3.61172e-28	4	MEOX2
1.48089e-30	0.0385565	1	1	8.57434e-28	4	DUX4
2.82207e-30	0.0207838	1	1	1.63398e-27	4	Sox17
3.15625e-30	0.0621047	1	1	1.82747e-27	4	NR3C1
4.69866e-30	0.013904	1	1	2.72052e-27	4	MEF2A
8.37399e-30	0.0266106	1	1	4.84854e-27	4	Foxa2
2.00612e-29	0.0811675	1	1	1.16154e-26	4	OLIG2
2.00612e-29	0.0811675	1	1	1.16154e-26	4	OLIG1
4.83351e-29	0.0536125	1	1	2.7986e-26	4	TAL1::TCF3
5.11794e-29	0.0198053	1	1	2.96329e-26	4	MSX2
8.00681e-29	0.030028	1	1	4.63594e-26	4	NOTO
1.72614e-28	0.0511828	1	1	9.99436e-26	4	HEY1
1.98078e-28	0.0276237	1	1	1.14687e-25	4	Hic1
3.16058e-28	0.0142679	1	1	1.82997e-25	4	MEF2D
4.36553e-28	0.0507811	1	1	2.52764e-25	4	HEY2
4.62971e-28	0.0166324	1	1	2.6806e-25	4	Dlx2
9.61823e-28	0.0323777	1	1	5.56896e-25	4	Barhl1
1.01604e-27	0.0166415	1	1	5.88287e-25	4	MGA
1.01604e-27	0.0166415	1	1	5.88287e-25	4	TBX15
1.01604e-27	0.0166415	1	1	5.88287e-25	4	TBX1
1.83331e-27	0.0134485	1	1	1.06149e-24	4	FOXC2
2.30651e-27	0.0745182	1	1	1.33547e-24	4	ESRRB
5.27168e-27	0.0281576	1	1	3.0523e-24	4	NFIX
2.02941e-26	0.0520448	1	1	1.17503e-23	4	IRF5
2.11922e-26	0.064741	1	1	1.22703e-23	4	NR1H4
2.81146e-26	0.0291369	1	1	1.62783e-23	4	FOXP1
1.78594e-25	0.0426	1	1	1.03406e-22	4	Six3
1.82833e-25	0.0399428	1	1	1.0586e-22	4	RARA
4.0476e-25	0.0357342	1	1	2.34356e-22	4	SOX13
1.6207e-24	0.0344224	1	1	9.38384e-22	4	POU6F1
2.96624e-24	0.0767949	1	1	1.71745e-21	4	TBX21
3.55442e-24	0.0334866	1	1	2.05801e-21	4	TBX19
4.15629e-24	0.0392822	1	1	2.40649e-21	4	BCL6B
5.9944e-24	0.0168375	1	1	3.47076e-21	4	POU4F3
1.20945e-23	0.0128112	1	1	7.0027e-21	4	ISL2
5.67036e-23	0.075778	1	1	3.28314e-20	4	Esrra
9.68516e-23	0.0124245	1	1	5.60771e-20	4	TBX4
9.68516e-23	0.0124245	1	1	5.60771e-20	4	TBX5
9.73974e-23	0.0229724	1	1	5.63931e-20	4	LBX1
1.23736e-22	0.0526701	1	1	7.16431e-20	4	Twist2
1.4806e-22	0.0390965	1	1	8.5727e-20	4	Rarb
4.12613e-22	0.0384196	1	1	2.38903e-19	4	ZBTB18
4.69167e-22	0.0326444	1	1	2.71648e-19	4	LHX6
1.21948e-21	0.0202592	1	1	7.0608e-19	4	Stat4
2.24621e-21	0.0330329	1	1	1.30056e-18	4	PAX3
3.03996e-21	0.0459745	1	1	1.76014e-18	4	MYF6
4.90831e-21	0.0533062	1	1	2.84191e-18	4	Atoh1
1.58965e-20	0.0343533	1	1	9.2041e-18	4	Crx
1.83191e-20	0.0627321	1	1	1.06068e-17	4	Neurog1
1.90628e-20	0.0137288	1	1	1.10373e-17	4	FOXG1
1.90628e-20	0.0137288	1	1	1.10373e-17	4	Foxj2
2.02731e-20	0.0529561	1	1	1.17381e-17	4	IRF4
3.58465e-20	0.0401764	1	1	2.07551e-17	4	GBX1
4.48252e-20	0.0557946	1	1	2.59538e-17	4	GRHL1
7.13828e-20	0.119832	1	1	4.13306e-17	4	TBX20
7.99517e-20	0.0115567	1	1	4.6292e-17	4	MEF2B
1.08977e-19	0.0626625	1	1	6.30978e-17	4	SIX1
1.47651e-19	0.0465723	1	1	8.549e-17	4	RORC
3.05453e-19	0.0447269	1	1	1.76857e-16	4	Hoxa11
3.79728e-19	0.0215908	1	1	2.19862e-16	4	HOXD13
6.55449e-19	0.0297237	1	1	3.79505e-16	4	BARHL2
8.21125e-19	0.0539394	1	1	4.75431e-16	4	Pax6
8.44798e-18	0.038155	1	1	4.89138e-15	4	Hoxc9
2.09717e-17	0.0339232	1	1	1.21426e-14	4	Rarg
3.28985e-17	0.0544219	1	1	1.90483e-14	4	RORA
3.62752e-17	0.036432	1	1	2.10034e-14	4	Rarg(var.2)
3.79134e-17	0.0284077	1	1	2.19518e-14	4	STAT1
6.95314e-17	0.00929383	1	1	4.02587e-14	4	Nr2e3
7.06162e-17	0.0548962	1	1	4.08868e-14	4	Ddit3::Cebpa
5.3821e-16	0.0236873	1	1	3.11623e-13	4	NFATC3
1.01671e-15	0.00933045	1	1	5.88676e-13	4	BSX
1.25586e-15	0.0426685	1	1	7.27142e-13	4	Nr2f6(var.2)
3.7714e-15	0.0232693	1	1	2.18364e-12	4	Stat5a::Stat5b
8.10942e-15	0.0427381	1	1	4.69535e-12	4	FOXH1
8.16908e-15	0.0330142	1	1	4.7299e-12	4	HMBOX1
8.5872e-15	0.0183524	1	1	4.97199e-12	4	HLTF
8.9451e-15	0.0328381	1	1	5.17921e-12	4	TP73
9.90991e-15	0.051128	1	1	5.73784e-12	4	MSC
1.76525e-14	0.0267052	1	1	1.02208e-11	4	MEOX1
3.70747e-14	0.0356618	1	1	2.14663e-11	4	PBX1
3.9247e-14	0.0187249	1	1	2.2724e-11	4	NFAT5
4.01398e-14	0.0197778	1	1	2.32409e-11	4	HNF1B
4.2865e-14	0.0214661	1	1	2.48188e-11	4	NFATC1
7.61627e-14	0.00942848	1	1	4.40982e-11	4	TEAD3
1.06986e-13	0.0170684	1	1	6.19447e-11	4	NKX2-8
1.57616e-13	0.0249127	1	1	9.12594e-11	4	EN2
2.73844e-13	0.0409064	1	1	1.58556e-10	4	TBX2
2.96364e-13	0.0103201	1	1	1.71595e-10	4	Dux
4.65096e-13	0.0346169	1	1	2.69291e-10	4	Gfi1b
5.56582e-13	0.0118632	1	1	3.22261e-10	4	HOXA5
7.25948e-13	0.0418748	1	1	4.20324e-10	4	Tcf21
7.61207e-13	0.0281741	1	1	4.40739e-10	4	NKX2-3
8.22555e-13	0.0289687	1	1	4.7626e-10	4	RORA(var.2)
1.04511e-12	0.0433229	1	1	6.0512e-10	4	TBR1
2.98338e-12	0.0251349	1	1	1.72738e-09	4	LHX2
5.81743e-12	0.0683925	1	1	3.36829e-09	4	PKNOX1
1.08515e-11	0.0353779	1	1	6.28304e-09	4	Rarb(var.2)
4.696e-10	0.0162365	1	1	2.71898e-07	4	PPARA::RXRA
1.27284e-09	0.0110397	1	1	7.36976e-07	4	Ascl2
1.87397e-09	0.04538	1	1	1.08503e-06	4	HOXD12
2.18926e-09	0.0816536	1	1	1.26758e-06	4	Spz1
8.88781e-09	0.0408423	1	1	5.14604e-06	4	T
1.66557e-08	0.0241027	1	1	9.64368e-06	4	NR2F2
2.03787e-08	0.0315942	1	1	1.17993e-05	4	SRF
2.66565e-08	0.0156044	1	1	1.54341e-05	4	NKX3-2
4.16311e-08	0.0315293	1	1	2.41044e-05	4	Hoxa9
6.10633e-08	0.0365406	1	1	3.53556e-05	4	TFAP4
7.01435e-08	0.015191	1	1	4.06131e-05	4	Nkx3-1
1.38657e-07	0.040834	1	1	8.02824e-05	4	TGIF2
3.01212e-07	0.0237475	1	1	0.000174402	4	GMEB2
3.36811e-07	0.0231243	1	1	0.000195014	4	E2F3
5.11158e-07	0.0172951	1	1	0.000295961	4	POU3F4
5.11158e-07	0.0172951	1	1	0.000295961	4	POU5F1B
5.24393e-07	0.0485635	1	1	0.000303624	4	BATF3
6.65258e-07	0.0434631	1	1	0.000385184	4	PKNOX2
9.33314e-07	0.0489615	1	1	0.000540389	4	SMAD3
1.04393e-06	0.0164043	1	1	0.000604434	4	GATA6
1.37361e-06	0.0147003	1	1	0.000795319	4	NEUROD1
1.93799e-06	0.0505967	1	1	0.0011221	4	PROX1
2.07694e-06	0.0132777	1	1	0.00120255	4	MYB
2.14053e-06	0.00817828	1	1	0.00123937	4	ZNF24
2.56225e-06	0.0252092	1	1	0.00148354	4	Ar
2.66005e-06	0.0379306	1	1	0.00154017	4	CLOCK
3.35008e-06	0.0183252	1	1	0.0019397	4	TEAD1
4.89511e-06	0.00697355	1	1	0.00283427	4	OTX1
5.89124e-06	0.0257092	1	1	0.00341103	4	CUX1
1.74632e-05	0.0187246	1	1	0.0101112	4	GSC2
1.79427e-05	0.0547929	1	1	0.0103888	4	HOXC11
1.90154e-05	0.0180788	1	1	0.0110099	4	Tcf7
2.57816e-05	0.0221512	1	1	0.0149275	4	HES5
2.62101e-05	0.0132381	1	1	0.0151757	4	FOS::JUN(var.2)
5.26308e-05	0.0255973	1	1	0.0304732	4	NFIC::TLX1
5.54243e-05	0.0226665	1	1	0.0320906	4	NR1A4::RXRA
7.39787e-05	0.0910334	0.998	0.997	0.0428337	4	MYBL1
7.8184e-05	0.015544	1	1	0.0452685	4	VENTX
9.30959e-05	0.0301936	1	1	0.0539025	4	SCRT2
0.000157673	0.0180573	1	1	0.0912924	4	CUX2
0.00019365	0.0295654	1	1	0.112123	4	ETV2
0.000220612	0.0379603	1	1	0.127734	4	TGIF1
0.000267018	0.0129985	1	1	0.154604	4	FIGLA
0.000275299	0.0112005	1	1	0.159398	4	TEAD4
0.000400714	0.0433095	1	1	0.232014	4	HOXC12
0.000546439	0.0212384	1	1	0.316388	4	PAX7
0.000715387	0.0188752	1	1	0.414209	4	TP53
0.00124596	0.00453934	1	1	0.721409	4	OTX2
0.00133084	0.0427215	1	1	0.770555	4	CEBPG
0.00177219	0.00898521	1	1	1	4	Gata1
0.00263597	0.0110302	1	1	1	4	SREBF2
0.00306408	0.0271722	1	1	1	4	HOXD11
0.00344403	0.0229736	1	1	1	4	HOXC13
0.00421891	0.0319348	1	1	1	4	CEBPB
0.00421891	0.0319348	1	1	1	4	CEBPD
0.00421891	0.0319348	1	1	1	4	CEBPE
0.00717679	0.0102724	1	1	1	4	HOXB13
0.0082919	0.00615613	1	1	1	4	STAT3
0	0.107834	1	1	0	5	PLAG1
0	0.101091	1	1	0	5	SP4
0	0.0991825	1	1	0	5	SP8
0	0.0983978	1	1	0	5	KLF16
0	0.0965896	1	1	0	5	SP3
0	0.0905284	1	1	0	5	KLF5
0	0.0832081	1	1	0	5	Zfx
0	0.0713685	1	1	0	5	SP1
0	0.0616384	1	1	0	5	RREB1
4.52836e-307	0.108698	1	1	2.62192e-304	5	EGR3
9.68552e-306	0.109658	1	1	5.60792e-303	5	EGR4
1.25682e-299	0.0623473	1	1	7.27699e-297	5	SP2
7.24939e-298	0.051398	1	1	4.1974e-295	5	Arnt
8.55246e-294	0.105024	1	1	4.95187e-291	5	ZIC4
8.25034e-293	0.107136	1	1	4.77695e-290	5	KLF9
5.45578e-291	0.105237	1	1	3.1589e-288	5	ZIC3
5.36899e-287	0.104486	1	1	3.10865e-284	5	TFAP2A(var.3)
1.90841e-285	0.108436	1	1	1.10497e-282	5	KLF14
2.54568e-285	0.108799	1	1	1.47395e-282	5	ZNF740
2.72716e-281	0.0911543	1	1	1.57902e-278	5	E2F4
4.46655e-280	0.0846424	1	1	2.58613e-277	5	CTCFL
1.5466e-278	0.0718365	1	1	8.9548e-276	5	Id2
3.52177e-278	0.087219	1	1	2.03911e-275	5	E2F6
7.73412e-278	0.0940407	1	1	4.47806e-275	5	TFAP2A(var.2)
5.32497e-277	0.103854	1	1	3.08316e-274	5	TFAP2C
8.87507e-271	0.101778	1	1	5.13867e-268	5	TFAP2B
4.22412e-270	0.10353	1	1	2.44576e-267	5	TFAP2C(var.3)
2.03811e-261	0.112487	1	1	1.18006e-258	5	ZIC1
2.94048e-259	0.10718	1	1	1.70254e-256	5	INSM1
1.04313e-255	0.0954674	1	1	6.03971e-253	5	RARA::RXRG
9.08095e-254	0.0976147	1	1	5.25787e-251	5	TFAP2B(var.3)
1.29031e-247	0.0680407	1	1	7.47091e-245	5	Mlxip
2.36957e-246	0.0388339	1	1	1.37198e-243	5	Ahr::Arnt
3.37088e-245	0.11727	1	1	1.95174e-242	5	Znf423
9.92748e-242	0.115302	1	1	5.74801e-239	5	ZEB1
2.64575e-239	0.110744	1	1	1.53189e-236	5	NR2C2
4.91699e-235	0.111494	1	1	2.84694e-232	5	Klf12
2.24613e-233	0.128996	1	1	1.30051e-230	5	MXI1
2.50992e-220	0.0934416	1	1	1.45324e-217	5	TFAP2A
2.9561e-218	0.0829031	1	1	1.71158e-215	5	TFDP1
2.3605e-216	0.111677	1	1	1.36673e-213	5	GLIS2
1.06397e-214	0.0828246	1	1	6.16038e-212	5	Tcfl5
6.22333e-213	0.117586	1	1	3.60331e-210	5	NRF1
5.35455e-212	0.13168	1	1	3.10029e-209	5	MYC
2.33124e-210	0.0704095	1	1	1.34979e-207	5	HIC2
5.5179e-209	0.0867135	1	1	3.19486e-206	5	ASCL1
2.83401e-198	0.0853313	1	1	1.64089e-195	5	Myod1
6.77701e-194	0.107895	1	1	3.92389e-191	5	USF2
1.26067e-183	0.0718458	1	1	7.29926e-181	5	Gmeb1
3.5168e-183	0.0325565	1	1	2.03623e-180	5	ZNF263
1.68769e-182	0.0949865	1	1	9.77171e-180	5	Klf1
2.13603e-181	0.107524	1	1	1.23676e-178	5	KLF13
3.40512e-178	0.061451	1	1	1.97156e-175	5	TFE3
2.69804e-177	0.0836573	1	1	1.56216e-174	5	Myog
1.07967e-176	0.111651	1	1	6.2513e-174	5	EGR1
5.49571e-168	0.0840137	1	1	3.18202e-165	5	Pparg::Rxra
7.22922e-168	0.106991	1	1	4.18572e-165	5	NHLH1
4.71271e-167	0.0850638	1	1	2.72866e-164	5	REST
1.11099e-166	0.0585949	1	1	6.43266e-164	5	ARNT::HIF1A
1.81658e-150	0.0893883	1	1	1.0518e-147	5	ZBTB7A
8.77195e-144	0.113642	1	1	5.07896e-141	5	NFKB2
9.73339e-142	0.0833432	1	1	5.63563e-139	5	Tcf12
6.2068e-141	0.0697978	1	1	3.59374e-138	5	Hes1
1.39795e-139	0.101366	1	1	8.09416e-137	5	TCF4
1.21189e-137	0.0976459	1	1	7.01682e-135	5	Gabpa
2.47852e-137	0.0771026	1	1	1.43506e-134	5	SNAI2
7.64353e-133	0.119824	1	1	4.4256e-130	5	JUNB(var.2)
1.07903e-130	0.0924197	1	1	6.24761e-128	5	ESR2
6.13661e-127	0.0901457	1	1	3.5531e-124	5	EGR2
4.55312e-126	0.0984135	1	1	2.63626e-123	5	TFEB
1.60027e-124	0.0750394	1	1	9.26557e-122	5	Creb3l2
2.41005e-124	0.119841	1	1	1.39542e-121	5	FOSL1::JUND(var.2)
1.73272e-116	0.0803324	1	1	1.00325e-113	5	Atf3
8.11406e-115	0.109714	1	1	4.69804e-112	5	MYCN
7.05236e-114	0.0849212	1	1	4.08332e-111	5	Rfx1
3.12965e-111	0.0765997	1	1	1.81207e-108	5	HINFP
1.52428e-110	0.0867125	1	1	8.82557e-108	5	ZBTB7C
2.03445e-108	0.0855452	1	1	1.17794e-105	5	ID4
1.8748e-106	0.0759908	1	1	1.08551e-103	5	TCF3
3.7028e-104	0.0831389	1	1	2.14392e-101	5	RFX4
3.00971e-103	0.131098	1	1	1.74262e-100	5	GLIS3
6.89031e-103	0.089173	1	1	3.98949e-100	5	RFX2
8.89343e-102	0.1186	1	1	5.14929e-99	5	CREB1
1.03746e-100	0.0826122	1	1	6.00687e-98	5	RFX3
1.39837e-100	0.0809806	1	1	8.09655e-98	5	ELK4
1.86497e-100	0.0473216	1	1	1.07982e-97	5	MZF1(var.2)
3.0205e-99	0.105605	1	1	1.74887e-96	5	GLIS1
1.52223e-94	0.089704	1	1	8.81373e-92	5	FOSL2::JUND(var.2)
1.87883e-93	0.0408705	1	1	1.08784e-90	5	THAP1
1.12081e-92	0.0940118	1	1	6.48947e-90	5	YY1
5.4906e-92	0.101168	1	1	3.17905e-89	5	NFKB1
3.21539e-86	0.0799638	1	1	1.86171e-83	5	MNT
1.84685e-83	0.1065	1	1	1.06933e-80	5	FOSB::JUNB(var.2)
2.25575e-82	0.0830392	1	1	1.30608e-79	5	USF1
2.56506e-82	0.0666341	1	1	1.48517e-79	5	Atf1
5.66641e-82	0.0685923	1	1	3.28085e-79	5	TFAP2B(var.2)
2.98333e-80	0.100984	1	1	1.72735e-77	5	RXRG
3.94994e-80	0.101374	1	1	2.28702e-77	5	RXRB
1.07044e-79	0.0473463	1	1	6.19787e-77	5	CTCF
4.46492e-78	0.0360849	1	1	2.58519e-75	5	NR4A2
3.01318e-77	0.102341	1	1	1.74463e-74	5	Crem
4.18039e-77	0.106445	1	1	2.42045e-74	5	Rxra
2.61408e-76	0.0945059	1	1	1.51355e-73	5	Nr2f6
7.5909e-74	0.0738096	1	1	4.39513e-71	5	RFX5
1.13112e-69	0.0925738	1	1	6.5492e-67	5	BHLHE41
2.495e-69	0.108039	1	1	1.4446e-66	5	NR4A2::RXRA
2.90609e-69	0.0858786	1	1	1.68263e-66	5	ETV5
3.56923e-69	0.0374082	1	1	2.06658e-66	5	EWSR1-FLI1
6.82021e-69	0.0900218	1	1	3.9489e-66	5	PAX5
9.17845e-67	0.125472	1	1	5.31432e-64	5	ATF7
1.2442e-65	0.125847	1	1	7.20391e-63	5	FOSL2::JUNB(var.2)
1.65333e-64	0.0518549	1	1	9.5728e-62	5	PBX3
6.86334e-63	0.0702761	1	1	3.97387e-60	5	MITF
7.99675e-63	0.080187	1	1	4.63012e-60	5	Arntl
1.01108e-62	0.0761768	1	1	5.85417e-60	5	TFEC
1.63528e-62	0.122503	1	1	9.46825e-60	5	CREB3L1
2.46695e-59	0.0522937	1	1	1.42836e-56	5	ZBTB33
5.93784e-59	0.119203	1	1	3.43801e-56	5	JDP2(var.2)
2.0429e-58	0.083294	1	1	1.18284e-55	5	BHLHE40
1.76284e-57	0.114691	1	1	1.02068e-54	5	ZBTB7B
1.20882e-55	0.106938	1	1	6.99905e-53	5	FOSL2::JUN(var.2)
1.05862e-54	0.112228	1	1	6.1294e-52	5	CREB3
4.20864e-51	0.0744039	1	1	2.4368e-48	5	MAX
1.86821e-50	0.0992924	1	1	1.08169e-47	5	GLI2
1.29483e-48	0.0662996	1	1	7.49709e-46	5	NR2F1
1.36963e-48	0.0510774	1	1	7.93016e-46	5	NFYB
4.3524e-48	0.0527609	1	1	2.52004e-45	5	TFAP2C(var.2)
1.29279e-47	0.113352	1	1	7.48526e-45	5	MAX::MYC
4.34578e-46	0.0465021	1	1	2.51621e-43	5	Ascl2
1.56867e-45	0.0223233	1	1	9.08261e-43	5	MEIS3
1.70458e-45	0.107151	1	1	9.86954e-43	5	MLX
1.70458e-45	0.107151	1	1	9.86954e-43	5	MLXIPL
1.70458e-45	0.107151	1	1	9.86954e-43	5	SREBF2(var.2)
1.70458e-45	0.107151	1	1	9.86954e-43	5	Srebf1(var.2)
4.93251e-43	0.0970179	1	1	2.85592e-40	5	JUN::JUNB(var.2)
5.48106e-43	0.0996235	1	1	3.17353e-40	5	Creb5
1.99325e-42	0.0374679	1	1	1.15409e-39	5	Nr1h3::Rxra
3.87541e-42	0.111204	1	1	2.24386e-39	5	CENPB
7.78965e-42	0.0758747	1	1	4.51021e-39	5	ELK3
7.78965e-42	0.0758747	1	1	4.51021e-39	5	ERF
7.78965e-42	0.0758747	1	1	4.51021e-39	5	ETV1
7.78965e-42	0.0758747	1	1	4.51021e-39	5	ETV3
7.78965e-42	0.0758747	1	1	4.51021e-39	5	ELK1
3.15638e-41	0.0714074	1	1	1.82755e-38	5	ETV4
3.15638e-41	0.0714074	1	1	1.82755e-38	5	FEV
3.52528e-40	0.0530402	1	1	2.04114e-37	5	RARA::RXRA
1.36874e-39	0.0737573	1	1	7.92503e-37	5	HIF1A
1.57268e-39	0.0694196	1	1	9.10585e-37	5	ETS1
2.79627e-39	0.130651	1	1	1.61904e-36	5	FOSL1::JUN(var.2)
5.74863e-37	0.0651064	1	1	3.32845e-34	5	FLI1
5.74863e-37	0.0651064	1	1	3.32845e-34	5	ERG
1.29212e-34	0.0459589	1	1	7.48135e-32	5	KLF4
6.15365e-34	0.10756	1	1	3.56296e-31	5	PAX9
5.90673e-33	0.0657307	1	1	3.42e-30	5	Hes2
1.4122e-30	0.0468994	1	1	8.17665e-28	5	ETV6
2.05051e-30	0.0292552	1	1	1.18724e-27	5	MGA
2.05051e-30	0.0292552	1	1	1.18724e-27	5	TBX15
2.05051e-30	0.0292552	1	1	1.18724e-27	5	TBX1
1.93027e-29	0.0788281	1	1	1.11763e-26	5	XBP1
5.00165e-29	0.095198	1	1	2.89595e-26	5	MTF1
2.32453e-28	0.0534842	1	1	1.34591e-25	5	NFYA
2.8567e-27	0.125517	1	1	1.65403e-24	5	FOSB::JUN
5.44063e-26	0.0698269	1	1	3.15012e-23	5	EBF1
7.12215e-25	0.0685965	1	1	4.12372e-22	5	ELF4
7.7655e-25	0.0483581	1	1	4.49622e-22	5	Esrrg
2.54973e-24	0.0841642	1	1	1.47629e-21	5	PAX1
1.79252e-22	0.0625973	1	1	1.03787e-19	5	PPARG
3.55307e-21	0.0359494	1	1	2.05723e-18	5	Nr5a2
2.82299e-19	0.00724874	1	1	1.63451e-16	5	Pax2
6.41401e-19	0.0635576	1	1	3.71371e-16	5	GCM2
5.0173e-17	0.0469211	1	1	2.90502e-14	5	ESR1
9.16855e-16	0.0457992	1	1	5.30859e-13	5	SREBF1
6.49956e-15	0.0497319	1	1	3.76324e-12	5	Hnf4a
1.09727e-14	0.0494167	1	1	6.35318e-12	5	ELF1
1.88208e-13	0.0194195	1	1	1.08972e-10	5	PITX3
4.19747e-12	0.0327355	1	1	2.43034e-09	5	FIGLA
1.22184e-11	0.00915933	1	1	7.07448e-09	5	VDR
1.34332e-11	0.0481375	1	1	7.77783e-09	5	SREBF2
2.18636e-11	0.0131517	1	1	1.2659e-08	5	TBX4
2.18636e-11	0.0131517	1	1	1.2659e-08	5	TBX5
3.98213e-11	0.0446781	1	1	2.30566e-08	5	ELF3
4.02738e-11	0.0188828	1	1	2.33185e-08	5	Gfi1
3.49946e-10	0.0244674	1	1	2.02619e-07	5	MYB
5.39288e-10	0.0245755	1	1	3.12248e-07	5	TWIST1
7.4033e-10	0.0309883	1	1	4.28651e-07	5	NEUROD1
6.97191e-09	0.0233393	1	1	4.03674e-06	5	ZNF143
1.08255e-08	0.0423274	1	1	6.26798e-06	5	NR1A4::RXRA
1.17083e-08	0.0331427	1	1	6.7791e-06	5	E2F7
6.16063e-08	0.0259988	1	1	3.567e-05	5	HES7
7.98443e-08	0.012153	1	1	4.62299e-05	5	MEIS2
1.13614e-07	0.00510557	1	1	6.57826e-05	5	Sox2
1.21923e-07	0.0114731	1	1	7.05935e-05	5	MEF2B
1.45444e-07	0.0216408	1	1	8.42123e-05	5	NFIC
2.36009e-07	0.0121875	1	1	0.000136649	5	Sox3
3.54912e-07	0.0337622	1	1	0.000205494	5	SMAD2::SMAD3::SMAD4
4.38123e-07	0.0572864	1	1	0.000253673	5	SPDEF
4.39594e-07	0.040583	1	1	0.000254525	5	RELB
5.49799e-07	0.0150046	1	1	0.000318334	5	REL
1.77206e-06	0.0234585	1	1	0.00102603	5	ZNF282
2.68146e-06	0.0136086	1	1	0.00155257	5	RBPJ
4.61839e-06	0.046574	1	1	0.00267405	5	SRF
5.00596e-06	0.0301009	1	1	0.00289845	5	RXRA::VDR
8.90288e-06	0.0163765	1	1	0.00515477	5	HNF4G
2.33605e-05	0.0394711	1	1	0.0135257	5	NFIC::TLX1
3.8418e-05	0.0760931	1	1	0.022244	5	Nkx2-5(var.2)
7.84922e-05	0.0651573	1	1	0.045447	5	TGIF1
7.91325e-05	0.0420762	1	1	0.0458177	5	BATF3
0.000281774	0.00771872	1	1	0.163147	5	FOS::JUN(var.2)
0.000327315	0.024442	1	1	0.189516	5	EHF
0.000590509	0.0544263	1	1	0.341905	5	ZBED1
0.000781031	0.0235504	1	1	0.452217	5	CLOCK
0.00200329	0.0168184	1	1	1	5	E2F2
0.00277655	0.0356171	1	1	1	5	PKNOX2
0.00422014	0.0211462	1	1	1	5	TBR1
0.00773597	0.0343962	1	1	1	5	CEBPB
0.00773597	0.0343962	1	1	1	5	CEBPD
0.00773597	0.0343962	1	1	1	5	CEBPE
2.43751e-261	0.217162	1	1	1.41132e-258	6	JUNB
1.08166e-260	0.22628	1	1	6.2628e-258	6	JDP2
1.35283e-260	0.223823	1	1	7.83288e-258	6	FOSL2
6.47396e-258	0.202629	1	1	3.74842e-255	6	FOSL1::JUND
6.63387e-247	0.219058	1	1	3.84101e-244	6	FOSL2::JUN
3.0434e-246	0.206645	1	1	1.76213e-243	6	FOS::JUN
3.0434e-246	0.206645	1	1	1.76213e-243	6	FOSB::JUNB
3.0434e-246	0.206645	1	1	1.76213e-243	6	FOSL2::JUNB
3.33076e-240	0.212283	1	1	1.92851e-237	6	FOS::JUND
3.51279e-237	0.15992	1	1	2.03391e-234	6	JUN(var.2)
4.27951e-229	0.250495	1	1	2.47783e-226	6	FOSL2::JUND
1.45315e-221	0.168747	1	1	8.41374e-219	6	FOSL1
1.95852e-219	0.212727	1	1	1.13398e-216	6	FOS
3.03085e-219	0.181723	1	1	1.75486e-216	6	FOSL1::JUN
3.68257e-213	0.226384	1	1	2.13221e-210	6	FOS::JUNB
3.28939e-212	0.216933	1	1	1.90456e-209	6	JUN::JUNB
2.12328e-210	0.138398	1	1	1.22938e-207	6	FOSL1::JUNB
1.00511e-204	0.180714	1	1	5.81958e-202	6	BATF::JUN
1.43671e-195	0.200959	1	1	8.31857e-193	6	JUND
4.18699e-177	0.164231	1	1	2.42427e-174	6	BACH2
3.25407e-148	0.138159	1	1	1.88411e-145	6	Bach1::Mafk
4.98854e-148	0.140688	1	1	2.88837e-145	6	MAF::NFE2
2.21291e-139	0.197719	1	1	1.28128e-136	6	NFE2
7.69908e-132	0.135422	1	1	4.45777e-129	6	Nfe2l2
2.47918e-93	0.0223412	1	1	1.43544e-90	6	Pax2
8.3461e-75	0.0816346	1	1	4.83239e-72	6	Hoxc9
1.16688e-69	0.0297677	1	1	6.75621e-67	6	POU4F3
3.51899e-61	0.027153	1	1	2.03749e-58	6	Smad4
2.93746e-60	0.0891368	1	1	1.70079e-57	6	NR3C2
2.41229e-59	0.0190989	1	1	1.39672e-56	6	MAFG::NFE2L1
1.13291e-57	0.0270211	1	1	6.55955e-55	6	NKX6-1
8.6832e-56	0.0172619	1	1	5.02758e-53	6	FOXD2
6.3119e-55	0.024983	1	1	3.65459e-52	6	Hoxd8
4.01837e-53	0.0163604	1	1	2.32664e-50	6	FOXL1
4.01837e-53	0.0163604	1	1	2.32664e-50	6	FOXP3
2.28973e-50	0.0317476	1	1	1.32575e-47	6	POU4F2
4.21952e-50	0.042085	1	1	2.4431e-47	6	MAFF
8.17906e-48	0.0248209	1	1	4.73568e-45	6	POU4F1
4.17234e-47	0.02307	1	1	2.41578e-44	6	Dlx2
1.59175e-46	0.0184605	1	1	9.21621e-44	6	FOXI1
1.59175e-46	0.0184605	1	1	9.21621e-44	6	FOXO4
1.59175e-46	0.0184605	1	1	9.21621e-44	6	FOXO6
2.69672e-45	0.0300045	1	1	1.5614e-42	6	HOXB2
2.62481e-44	0.0128216	1	1	1.51976e-41	6	NFATC2
5.93422e-44	0.0244737	1	1	3.43591e-41	6	VSX1
7.19365e-44	0.024757	1	1	4.16512e-41	6	VSX2
5.86406e-43	0.0529294	1	1	3.39529e-40	6	MAFK
6.76188e-43	0.028608	1	1	3.91513e-40	6	MNX1
1.09347e-42	0.0375392	1	1	6.3312e-40	6	Bcl6
7.66429e-42	0.0161353	1	1	4.43762e-39	6	Arid3a
3.50997e-41	0.0303926	1	1	2.03227e-38	6	HESX1
1.2418e-40	0.0215847	1	1	7.19001e-38	6	LMX1B
2.69543e-39	0.0444726	1	1	1.56065e-36	6	MAFG
3.23433e-39	0.0196765	1	1	1.87267e-36	6	Dlx3
7.88183e-39	0.027397	1	1	4.56358e-36	6	ESX1
5.25563e-38	0.0202684	1	1	3.04301e-35	6	PDX1
2.0783e-37	0.0683427	1	1	1.20334e-34	6	NR3C1
3.86535e-37	0.0230413	1	1	2.23804e-34	6	Hoxd3
9.91634e-37	0.0188802	1	1	5.74156e-34	6	Dlx4
2.29373e-36	0.0201653	1	1	1.32807e-33	6	DLX6
6.90394e-35	0.0267747	1	1	3.99738e-32	6	FOXP2
7.53291e-35	0.054631	1	1	4.36155e-32	6	RELA
1.52547e-34	0.0141345	1	1	8.83248e-32	6	Nkx2-5
2.33935e-34	0.0393349	1	1	1.35448e-31	6	REL
3.73603e-34	0.0253783	1	1	2.16316e-31	6	HOXB3
5.1747e-34	0.0208679	1	1	2.99615e-31	6	VAX1
5.1747e-34	0.0208679	1	1	2.99615e-31	6	VAX2
1.32331e-33	0.0230492	1	1	7.66197e-31	6	GSX2
4.0195e-33	0.0261916	1	1	2.32729e-30	6	LBX2
4.57871e-33	0.0164465	1	1	2.65108e-30	6	Sox5
1.81075e-32	0.0220647	1	1	1.04842e-29	6	LIN54
3.51317e-31	0.038975	1	1	2.03413e-28	6	STAT1
4.65745e-31	0.0211645	1	1	2.69666e-28	6	HOXA10
6.34986e-30	0.0300424	1	1	3.67657e-27	6	MEOX2
1.09625e-29	0.017558	1	1	6.3473e-27	6	FOXG1
1.09625e-29	0.017558	1	1	6.3473e-27	6	Foxj2
3.926e-29	0.00981735	1	1	2.27315e-26	6	ZNF384
1.58566e-28	0.0570332	1	1	9.18097e-26	6	Hoxa9
5.95979e-28	0.0252865	1	1	3.45072e-25	6	GBX2
6.52134e-28	0.0233142	1	1	3.77586e-25	6	Stat6
2.99409e-27	0.0227045	1	1	1.73358e-24	6	Alx1
4.09329e-27	0.0424864	1	1	2.37001e-24	6	BCL6B
7.16999e-27	0.0233414	1	1	4.15142e-24	6	Alx4
3.30734e-26	0.024738	1	1	1.91495e-23	6	RAX
6.38985e-26	0.0322848	1	1	3.69972e-23	6	Stat5a::Stat5b
7.17806e-26	0.0184093	1	1	4.1561e-23	6	CDX1
9.12939e-26	0.0232351	1	1	5.28592e-23	6	MIXL1
1.87065e-25	0.0204595	1	1	1.0831e-22	6	Hoxd9
3.78239e-25	0.0191263	1	1	2.19e-22	6	Arid3b
5.81527e-25	0.0250672	1	1	3.36704e-22	6	Dlx1
5.82929e-25	0.0317594	1	1	3.37516e-22	6	SOX21
1.63973e-24	0.0278514	1	1	9.49404e-22	6	NOTO
4.19661e-24	0.0179646	1	1	2.42984e-21	6	Lhx8
5.72161e-24	0.0149914	1	1	3.31281e-21	6	EN1
1.3022e-23	0.0274958	1	1	7.53971e-21	6	STAT3
1.57462e-23	0.0175873	1	1	9.11703e-21	6	Lhx4
3.42157e-23	0.0331031	1	1	1.98109e-20	6	MEOX1
3.77495e-23	0.017123	1	1	2.18569e-20	6	HNF1A
1.54546e-22	0.0210046	1	1	8.94824e-20	6	Stat4
1.94603e-22	0.0213038	1	1	1.12675e-19	6	mix-a
5.09386e-22	0.0191278	1	1	2.94935e-19	6	Lhx3
6.64253e-22	0.012162	1	1	3.84603e-19	6	Nr2e3
2.78836e-21	0.0186255	1	1	1.61446e-18	6	GSX1
5.29679e-21	0.0191321	1	1	3.06684e-18	6	Hoxb5
1.09247e-20	0.0367215	1	1	6.32538e-18	6	NEUROD1
1.11958e-20	0.0129951	1	1	6.48239e-18	6	NKX6-2
3.06864e-20	0.013995	1	1	1.77674e-17	6	Msx3
7.2724e-20	0.0137807	1	1	4.21072e-17	6	ONECUT3
7.7159e-20	0.0496178	1	1	4.46751e-17	6	Pax6
9.23033e-20	0.0196727	1	1	5.34436e-17	6	Arx
2.00403e-19	0.0160953	1	1	1.16033e-16	6	Arid5a
4.77831e-19	0.0209263	1	1	2.76664e-16	6	HOXA2
7.07063e-19	0.014057	1	1	4.0939e-16	6	FOXA1
2.14811e-18	0.0129363	1	1	1.24376e-15	6	FOXC2
3.59923e-18	0.0191064	1	1	2.08395e-15	6	ALX3
3.89908e-18	0.0240781	1	1	2.25757e-15	6	EMX2
4.57426e-18	0.0122233	1	1	2.6485e-15	6	SHOX
4.57426e-18	0.0122233	1	1	2.6485e-15	6	Prrx2
4.57426e-18	0.0122233	1	1	2.6485e-15	6	LHX9
4.57426e-18	0.0122233	1	1	2.6485e-15	6	PRRX1
4.57426e-18	0.0122233	1	1	2.6485e-15	6	RAX2
4.57426e-18	0.0122233	1	1	2.6485e-15	6	UNCX
6.24246e-18	0.0235508	1	1	3.61438e-15	6	FOXP1
1.05851e-17	0.0186904	1	1	6.1288e-15	6	EVX2
1.34457e-17	0.0196753	1	1	7.78508e-15	6	CDX2
1.87737e-17	0.0204427	1	1	1.087e-14	6	HNF1B
2.34256e-17	0.0174997	1	1	1.35634e-14	6	Foxq1
2.889e-17	0.0257156	1	1	1.67273e-14	6	Sox1
4.2685e-17	0.00861597	1	1	2.47146e-14	6	MEF2C
5.72684e-17	0.0558957	1	1	3.31584e-14	6	MSC
6.56387e-17	0.0130239	1	1	3.80048e-14	6	BARX1
1.06519e-16	0.0130947	1	1	6.16745e-14	6	FOXC1
1.89986e-16	0.0285833	1	1	1.10002e-13	6	HOXC10
2.00925e-16	0.0214248	1	1	1.16336e-13	6	EMX1
3.62802e-16	0.0154054	1	1	2.10063e-13	6	LMX1A
4.33484e-16	0.0212355	1	1	2.50987e-13	6	JUND(var.2)
9.4455e-16	0.0213517	1	1	5.46894e-13	6	DUXA
4.78854e-15	0.00758848	1	1	2.77256e-12	6	MEIS1
5.73672e-15	0.0117285	1	1	3.32156e-12	6	ISX
5.73672e-15	0.0117285	1	1	3.32156e-12	6	Shox2
6.05744e-15	0.0402026	1	1	3.50726e-12	6	RORB
7.33382e-15	0.00925716	1	1	4.24628e-12	6	IRF1
7.40557e-15	0.0188759	1	1	4.28783e-12	6	Dmbx1
1.58827e-14	0.0142816	1	1	9.19606e-12	6	RBPJ
1.72761e-14	0.0455778	1	1	1.00029e-11	6	NFIC::TLX1
1.93249e-14	0.00828041	1	1	1.11891e-11	6	Foxd3
9.60366e-14	0.0164317	1	1	5.56052e-11	6	SOX9
1.22029e-13	0.015219	1	1	7.06548e-11	6	TBP
1.2293e-13	0.0113644	1	1	7.11765e-11	6	ONECUT2
1.86157e-13	0.00779376	1	1	1.07785e-10	6	Foxj3
3.77814e-13	0.0254021	1	1	2.18754e-10	6	DUX4
4.36246e-13	0.0290032	1	1	2.52586e-10	6	Six3
3.73347e-12	0.0102921	1	1	2.16168e-09	6	EWSR1-FLI1
4.17016e-12	0.0144768	1	1	2.41452e-09	6	Pou5f1::Sox2
6.87883e-12	0.0340292	1	1	3.98284e-09	6	Ar
8.69232e-12	0.0160471	1	1	5.03285e-09	6	NFAT5
1.57861e-11	0.00919932	1	1	9.14017e-09	6	Sox2
4.10008e-11	0.0333643	1	1	2.37395e-08	6	MYF6
5.26191e-11	0.0253593	1	1	3.04665e-08	6	POU6F2
5.74248e-11	0.0230502	1	1	3.32489e-08	6	SREBF1
9.90126e-11	0.0354165	1	1	5.73283e-08	6	ATF4
1.00875e-10	0.0416215	1	1	5.84065e-08	6	SIX1
1.36208e-10	0.0258717	1	1	7.88643e-08	6	ZBTB18
1.42122e-10	0.0185824	1	1	8.22885e-08	6	Rfx1
2.09427e-10	0.0268536	1	1	1.21258e-07	6	SREBF2
2.59969e-10	0.0395343	1	1	1.50522e-07	6	ETV2
2.87886e-10	0.0238146	1	1	1.66686e-07	6	Hand1::Tcf3
3.2524e-10	0.00834939	1	1	1.88314e-07	6	ISL2
3.62545e-10	0.0137378	1	1	2.09914e-07	6	PAX4
4.42449e-10	0.010073	1	1	2.56178e-07	6	ONECUT1
4.90821e-10	0.00988164	1	1	2.84186e-07	6	Hmx3
5.78215e-10	0.0594754	1	1	3.34786e-07	6	SMAD3
2.61333e-09	0.0114932	1	1	1.51312e-06	6	Hmx1
2.87062e-09	0.060151	1	1	1.66209e-06	6	HOXC12
3.4803e-09	0.0211845	1	1	2.01509e-06	6	RUNX1
5.69062e-09	0.0253886	1	1	3.29487e-06	6	GBX1
8.15111e-09	0.027378	1	1	4.71949e-06	6	Hoxa11
8.20778e-09	0.0142075	1	1	4.7523e-06	6	TCF7L2
9.80766e-09	0.0208181	1	1	5.67864e-06	6	LHX6
1.14487e-08	0.0136413	1	1	6.62881e-06	6	Hic1
1.44092e-08	0.00878504	1	1	8.34294e-06	6	Hmx2
1.98442e-08	0.0612488	1	1	1.14898e-05	6	TBX20
2.6877e-08	0.0205856	1	1	1.55618e-05	6	HLF
4.36239e-08	0.0311677	1	1	2.52582e-05	6	Mafb
4.37516e-08	0.00916061	1	1	2.53322e-05	6	Nobox
4.57443e-08	0.0313937	1	1	2.64859e-05	6	TFAP4
4.84422e-08	0.0192474	1	1	2.8048e-05	6	SOX4
4.98361e-08	0.0089093	1	1	2.88551e-05	6	HOXA5
5.77642e-08	0.0117501	1	1	3.34455e-05	6	HOXA13
5.80903e-08	0.0188955	1	1	3.36343e-05	6	SIX2
9.75029e-08	0.00779688	1	1	5.64542e-05	6	SPIB
1.20355e-07	0.0159634	1	1	6.96855e-05	6	Sox11
1.48912e-07	0.0262446	1	1	8.622e-05	6	BHLHE23
2.09424e-07	0.0199134	1	1	0.000121256	6	RFX5
2.10406e-07	0.0166272	1	1	0.000121825	6	JUN
2.15006e-07	0.0115057	1	1	0.000124489	6	IRF2
3.0411e-07	0.013172	1	1	0.00017608	6	EVX1
3.21887e-07	0.0139428	1	1	0.000186372	6	NFATC3
4.16685e-07	0.0164516	1	1	0.000241261	6	NFIL3
6.17246e-07	0.0180764	1	1	0.000357385	6	RUNX3
8.12564e-07	0.00968309	1	1	0.000470475	6	FOXF2
1.02528e-06	0.0125052	1	1	0.000593638	6	PHOX2A
1.08685e-06	0.0265336	1	1	0.000629287	6	Tcf21
1.64021e-06	0.0103582	1	1	0.000949683	6	Mecom
2.01982e-06	0.0110466	1	1	0.00116948	6	IRF7
2.84202e-06	0.0179113	1	1	0.00164553	6	Rarb
3.25404e-06	0.00719336	1	1	0.00188409	6	SOX15
7.24358e-06	0.00616448	1	1	0.00419403	6	TEAD3
7.5884e-06	0.00892596	1	1	0.00439368	6	SOX10
8.59622e-06	0.019082	1	1	0.00497721	6	SOX8
1.36323e-05	0.0141973	1	1	0.00789312	6	TWIST1
1.37793e-05	0.00732503	1	1	0.00797819	6	STAT1::STAT2
2.28025e-05	0.0158378	1	1	0.0132027	6	LHX2
2.44711e-05	0.0101817	1	1	0.0141688	6	HLTF
2.76116e-05	0.00881993	1	1	0.0159871	6	FOXB1
3.48108e-05	0.0108222	1	1	0.0201555	6	NFATC1
3.90503e-05	0.0282353	1	1	0.0226101	6	TBX21
4.02379e-05	0.0088859	1	1	0.0232977	6	POU3F3
6.2726e-05	0.00647593	1	1	0.0363183	6	IRF3
9.36482e-05	0.00617934	1	1	0.0542223	6	Sox17
9.79359e-05	0.00720621	1	1	0.0567049	6	FOXK1
9.97319e-05	0.0142797	1	1	0.0577448	6	EN2
0.000103536	0.00965658	1	1	0.0599475	6	FOXD1
0.000114839	0.00806018	1	1	0.0664916	6	Pou2f3
0.000116982	0.0103399	1	1	0.0677327	6	Phox2b
0.000119	0.00596491	1	1	0.0689013	6	BSX
0.000121095	0.0138362	1	1	0.0701142	6	RFX2
0.000122336	0.0145566	1	1	0.0708324	6	POU6F1
0.000125029	0.013787	1	1	0.0723915	6	Foxo1
0.000149539	0.0106758	1	1	0.0865832	6	TEAD2
0.000184291	0.0105424	1	1	0.106704	6	SOX13
0.000190287	0.0120816	1	1	0.110176	6	RFX3
0.000194894	0.00606085	1	1	0.112843	6	MSX1
0.000249137	0.0188822	1	1	0.14425	6	PRDM1
0.000263015	0.0156597	1	1	0.152286	6	Gfi1b
0.000271467	0.00693248	1	1	0.157179	6	OTX1
0.00029868	0.0387123	1	1	0.172936	6	HOXC11
0.000307436	0.00476725	1	1	0.178005	6	MEIS3
0.000440572	0.0127121	1	1	0.255091	6	Gfi1
0.000463789	0.00663348	1	1	0.268534	6	OTX2
0.000479964	0.0180759	1	1	0.277899	6	NR1H4
0.000502094	0.00912607	1	1	0.290713	6	LBX1
0.00104426	0.0138597	1	1	0.604629	6	DBP
0.00109913	0.00940268	1	1	0.636393	6	HSF4
0.00117159	0.00852799	1	1	0.678351	6	HOXD13
0.00127966	0.00788147	1	1	0.740922	6	LEF1
0.0013074	0.0188643	1	1	0.756983	6	Esrra
0.00139022	0.00921164	1	1	0.804937	6	HSF2
0.00156935	0.012751	1	1	0.908655	6	NR1A4::RXRA
0.0019073	0.0129294	1	1	1	6	E2F3
0.00212244	0.0253203	1	1	1	6	HOXD12
0.00268911	0.0078124	1	1	1	6	Barhl1
0.00270342	0.0112967	1	1	1	6	TBX19
0.0028129	0.00450462	1	1	1	6	ZNF354C
0.00283903	0.00733733	1	1	1	6	POU3F2
0.00305323	0.0322254	1	1	1	6	Spz1
0.00323752	0.00479989	1	1	1	6	MZF1
0.00348792	0.00658505	1	1	1	6	FOXO3
0.00373003	0.00709488	1	1	1	6	POU2F1
0.00488959	0.00453286	1	1	1	6	Pitx1
0.00525472	0.00816777	1	1	1	6	HSF1
0.0053366	0.00776057	1	1	1	6	RFX4
0.00551892	0.00656304	1	1	1	6	NFIC
0.00603501	0.00733145	1	1	1	6	GRHL2
0.00641198	0.0129357	1	1	1	6	NRL
0.00699341	0.00560616	1	1	1	6	POU1F1
0.00743866	0.00995864	1	1	1	6	VENTX
0.00892342	0.00595875	1	1	1	6	CEBPA
0.00988049	0.00880357	1	1	1	6	NR4A1
4.23297e-78	0.0214423	1	1	2.45089e-75	7	ZNF263
2.45248e-75	0.0418103	1	1	1.41999e-72	7	CTCFL
4.75732e-75	0.0221356	1	1	2.75449e-72	7	Ahr::Arnt
1.85103e-69	0.030253	1	1	1.07175e-66	7	SP2
3.42621e-65	0.0225362	1	1	1.98377e-62	7	RREB1
8.44984e-65	0.0388139	1	1	4.89246e-62	7	CTCF
5.09396e-61	0.0449139	1	1	2.9494e-58	7	EGR3
2.08308e-59	0.0281686	1	1	1.2061e-56	7	SP1
1.76157e-58	0.0397056	1	1	1.01995e-55	7	SP8
2.15587e-58	0.0438564	1	1	1.24825e-55	7	EGR4
1.08291e-56	0.0362836	1	1	6.27002e-54	7	KLF16
3.83141e-56	0.0418503	1	1	2.21839e-53	7	ZIC4
4.39894e-53	0.0333606	1	1	2.54699e-50	7	SP3
3.66466e-49	0.0347878	1	1	2.12184e-46	7	E2F6
1.02773e-48	0.0403257	1	1	5.95054e-46	7	KLF14
4.35831e-48	0.0387121	1	1	2.52346e-45	7	ZIC3
7.00336e-48	0.0367678	1	1	4.05494e-45	7	TFAP2A(var.2)
1.22461e-47	0.0327252	1	1	7.09048e-45	7	PLAG1
2.37211e-45	0.0336572	1	1	1.37345e-42	7	SP4
9.49091e-45	0.0390378	1	1	5.49524e-42	7	ZEB1
4.45506e-44	0.0335151	1	1	2.57948e-41	7	E2F4
9.10021e-43	0.0275064	1	1	5.26902e-40	7	Zfx
8.03845e-41	0.0350779	1	1	4.65426e-38	7	Tcfl5
1.45638e-40	0.0159465	1	1	8.43247e-38	7	Arnt
4.59686e-38	0.0329421	1	1	2.66158e-35	7	TFAP2C(var.3)
6.64031e-37	0.0321325	1	1	3.84474e-34	7	TFAP2A(var.3)
5.28401e-35	0.048803	1	1	3.05944e-32	7	RFX3
9.80736e-35	0.0256598	1	1	5.67846e-32	7	KLF5
1.63442e-33	0.0531251	1	1	9.46331e-31	7	RFX5
2.58513e-33	0.0321934	1	1	1.49679e-30	7	INSM1
2.82731e-33	0.0300789	1	1	1.63701e-30	7	TFAP2B(var.3)
2.16596e-32	0.0364722	1	1	1.25409e-29	7	GLIS2
1.41391e-31	0.0493048	1	1	8.18653e-29	7	RFX2
1.85019e-31	0.0206736	1	1	1.07126e-28	7	Id2
9.04218e-30	0.0432466	1	1	5.23542e-27	7	RFX4
4.82242e-29	0.0312486	1	1	2.79218e-26	7	ZIC1
6.10395e-29	0.0425044	1	1	3.53419e-26	7	EGR1
8.02548e-29	0.035187	1	1	4.64675e-26	7	NRF1
9.01287e-29	0.0238175	1	1	5.21845e-26	7	ZNF740
1.54307e-28	0.0197477	1	1	8.9344e-26	7	Mlxip
6.33899e-28	0.0316991	1	1	3.67027e-25	7	Klf12
3.69282e-27	0.0264565	1	1	2.13815e-24	7	TFAP2B
1.92431e-26	0.0377783	1	1	1.11418e-23	7	Rfx1
2.30366e-26	0.0254663	1	1	1.33382e-23	7	TFAP2C
2.16201e-25	0.0320867	1	1	1.2518e-22	7	MXI1
2.67095e-24	0.0232984	1	1	1.54648e-21	7	Znf423
5.65446e-24	0.0394543	1	1	3.27393e-21	7	EGR2
1.84043e-23	0.0247441	1	1	1.06561e-20	7	Gmeb1
1.155e-21	0.0594546	1	1	6.68747e-19	7	Hoxa9
4.16557e-21	0.0328095	1	1	2.41187e-18	7	MYC
1.2479e-20	0.0423982	1	1	7.22534e-18	7	Hoxc9
2.56808e-20	0.0251967	1	1	1.48692e-17	7	TFAP2A
3.34462e-20	0.0219911	1	1	1.93653e-17	7	RARA::RXRG
4.00143e-20	0.0188975	1	1	2.31683e-17	7	TFE3
1.44119e-19	0.0166785	1	1	8.34451e-17	7	EWSR1-FLI1
2.83257e-18	0.022508	1	1	1.64006e-15	7	TFDP1
8.68596e-18	0.0258087	1	1	5.02917e-15	7	USF2
1.81535e-17	0.0347528	1	1	1.05109e-14	7	ZBTB7C
1.76777e-16	0.011915	1	1	1.02354e-13	7	MZF1
2.27196e-15	0.0144327	1	1	1.31547e-12	7	ASCL1
2.41377e-15	0.0229685	1	1	1.39757e-12	7	KLF13
4.87381e-15	0.0182122	1	1	2.82194e-12	7	REST
3.32255e-14	0.0154253	1	1	1.92376e-11	7	ARNT::HIF1A
3.67235e-13	0.0222556	1	1	2.12629e-10	7	Hes1
2.32379e-12	0.0268476	1	1	1.34547e-09	7	ZBTB33
4.37661e-12	0.0196738	1	1	2.53406e-09	7	NFYB
4.96372e-12	0.012777	1	1	2.874e-09	7	SNAI2
7.73176e-12	0.0263457	1	1	4.47669e-09	7	NFKB2
5.14294e-11	0.0181334	1	1	2.97776e-08	7	Creb3l2
5.55089e-11	0.0225338	1	1	3.21397e-08	7	HINFP
6.13114e-11	0.0133265	1	1	3.54993e-08	7	KLF9
6.4587e-11	0.0486799	1	1	3.73959e-08	7	CENPB
2.09158e-10	0.0204976	1	1	1.21102e-07	7	TCF4
8.35647e-10	0.00987003	1	1	4.83839e-07	7	HIC2
1.54625e-09	0.0254798	1	1	8.95278e-07	7	MYCN
2.07919e-09	0.0285967	1	1	1.20385e-06	7	GLIS1
2.1359e-09	0.0276576	1	1	1.23668e-06	7	Crem
3.60523e-09	0.030093	1	1	2.08743e-06	7	BHLHE40
3.63414e-09	0.0186308	1	1	2.10416e-06	7	Atf3
3.96369e-09	0.0209082	1	1	2.29497e-06	7	YY1
5.18449e-09	0.0212068	1	1	3.00182e-06	7	TFEB
5.48751e-09	0.00839467	1	1	3.17727e-06	7	ZNF354C
1.15391e-08	0.0126581	1	1	6.68111e-06	7	MZF1(var.2)
1.7541e-08	0.0279548	1	1	1.01562e-05	7	BHLHE41
2.50351e-08	0.0244466	1	1	1.44953e-05	7	USF1
3.04016e-08	0.0120458	1	1	1.76025e-05	7	Myog
7.90221e-08	0.022178	1	1	4.57538e-05	7	TFEC
1.04021e-07	0.0327133	1	1	6.02279e-05	7	ZBTB7B
1.11909e-07	0.00601482	1	1	6.47954e-05	7	NFATC2
1.58652e-07	0.0173615	1	1	9.18594e-05	7	REL
2.99877e-07	0.0099679	1	1	0.000173629	7	NR2C2
5.98366e-07	0.0113483	1	1	0.000346454	7	RBPJ
1.22204e-06	0.0155179	1	1	0.000707564	7	NHLH1
1.51671e-06	0.00733621	1	1	0.000878177	7	Myod1
1.5799e-06	0.03449	1	1	0.000914765	7	MTF1
1.30669e-05	0.0151998	1	1	0.00756576	7	MITF
3.32002e-05	0.013379	1	1	0.0192229	7	NFYA
5.22096e-05	0.0170221	1	1	0.0302294	7	FOSL1::JUND(var.2)
6.17032e-05	0.0149897	1	1	0.0357261	7	TFAP2C(var.2)
6.65083e-05	0.00936577	1	1	0.0385083	7	Tcf12
7.405e-05	0.00744182	1	1	0.042875	7	Pparg::Rxra
0.000113427	0.0127734	1	1	0.0656744	7	TFAP2B(var.2)
0.000119448	0.011021	1	1	0.0691602	7	TCF3
0.000161667	0.0140623	1	1	0.0936055	7	NEUROD1
0.000239825	0.020087	1	1	0.138859	7	Gfi1b
0.000443764	0.0149777	1	1	0.25694	7	NFKB1
0.000525653	0.0168364	1	1	0.304353	7	FOSB::JUNB(var.2)
0.00060534	0.0124762	1	1	0.350492	7	RARA::RXRA
0.00113706	0.0141604	1	1	0.65836	7	RELA
0.00114476	0.00544856	1	1	0.662817	7	THAP1
0.00154421	0.0168193	1	1	0.894096	7	Hes2
0.0015447	0.00666789	1	1	0.894383	7	Nr1h3::Rxra
0.00173813	0.00525398	1	1	1	7	ID4
0.00175776	0.0104812	1	1	1	7	SREBF1
0.00196013	0.0153147	1	1	1	7	ZNF282
0.00257148	0.00653103	1	1	1	7	ZBTB7A
0.00278261	0.012098	1	1	1	7	JUNB(var.2)
0.003122	0.0122621	1	1	1	7	CREB1
0.00473042	0.0125461	1	1	1	7	PAX5
0.00810815	0.0044362	1	1	1	7	Pax2
0.00923463	0.0117273	1	1	1	7	Gfi1

## Sheet: Table S4
Table S4. List of genes whose distal elements were enriched in open chromatin peaks in HD Lin-CD34+ cells (compared with MDS-RS cells) from cluster 2 shown in Figure 1D.
	p_val	avg_logFC	pct.1	pct.2	p_val_adj	anno	distance	type
chr4-68864281-68865010	6.19776e-38	-1.16415	0.073	0.41	6.40111e-33	UGT2B10	55821	distal
chrY-19566943-19567520	5.11232e-44	-1.06412	0	0.286	5.28005e-39	KDM5D	41840	distal
chr3-196044532-196045796	8.71462e-16	-0.788923	0.058	0.231	9.00055e-11	TFRC	51634	distal
chr2-214103151-214104557	4.03469e-16	-0.768468	0.09	0.286	4.16707e-11	SPAG16	27322	distal
chr7-134593751-134594467	4.37757e-20	-0.755418	0.048	0.245	4.52119e-15	AKR1B15	48579	distal
chr8-102924783-102925490	1.18865e-21	-0.739581	0.053	0.267	1.22765e-16	AZIN1	21032	distal
chr13-99452593-99453383	3.71253e-20	-0.728085	0.131	0.386	3.83434e-15	TM9SF2	17697	distal
chr6-161254698-161255332	3.21485e-14	-0.711027	0.145	0.35	3.32032e-09	AGPAT4	42670	distal
chr9-87937621-87938674	2.53122e-18	-0.707596	0.072	0.279	2.61427e-13	RP11-350E12.6	7165	distal
chr4-8409154-8411321	3.61018e-20	-0.703375	0.261	0.541	3.72863e-15	ACOX3	41268	distal
chr20-63834895-63835730	9.37441e-20	-0.701278	0.078	0.299	9.68199e-15	ZBTB46	15138	distal
chr3-60427062-60427528	2.2982e-14	-0.699737	0.057	0.218	2.37361e-09	FHIT	27322	distal
chr13-21435853-21436243	3.99261e-16	-0.699648	0.023	0.165	4.12361e-11	ZDHHC20	45429	distal
chr14-55124901-55125892	1.12642e-12	-0.694803	0.126	0.308	1.16338e-07	LGALS3	13514	distal
chrY-12662046-12662470	5.72347e-26	-0.686225	0	0.172	5.91125e-21	USP9Y	15817	distal
chr1-11797572-11798806	2.3269e-17	-0.679	0.118	0.345	2.40325e-12	MTHFR	326	distal
chr4-89009723-89010209	6.65118e-20	-0.676025	0.033	0.216	6.8694e-15	FAM13A	55392	distal
chr14-77825881-77826604	3.95338e-15	-0.66586	0.072	0.25	4.08309e-10	ADCK1	46893	distal
chr2-113235214-113235963	5.9202e-16	-0.664909	0.038	0.197	6.11444e-11	PAX8	58704	distal
chr7-98930648-98931465	1.12544e-18	-0.658022	0.138	0.391	1.16237e-13	TRRAP	56216	distal
chr14-55385571-55386462	6.14991e-14	-0.655271	0.058	0.214	6.35169e-09	ATG14	46708	distal
chr6-26163367-26164354	6.5428e-17	-0.65395	0.072	0.265	6.75747e-12	HIST1H2BD	57029	distal
chr1-184296280-184297312	7.99957e-18	-0.65368	0.156	0.4	8.26204e-13	C1orf21	25965	distal
chr10-121509897-121510241	5.74984e-16	-0.649776	0.022	0.16	5.93849e-11	FGFR2	44393	distal
chr2-60383275-60384555	5.75747e-17	-0.648065	0.065	0.257	5.94638e-12	BCL11A	40769	distal
chr22-36940470-36941221	4.74782e-15	-0.645485	0.18	0.408	4.9036e-10	CSF2RB	42370	distal
chr1-167866532-167867232	3.70465e-18	-0.644595	0.078	0.289	3.8262e-13	ADCY10	55362	distal
chr4-82839684-82839964	2.93922e-17	-0.642094	0.017	0.158	3.03566e-12	SEC31A	49842	distal
chr7-157612042-157613869	4.37287e-14	-0.640319	0.185	0.405	4.51634e-09	PTPRN2	27322	distal
chr10-130179630-130181102	1.58782e-13	-0.636359	0.123	0.318	1.63992e-08	GLRX3	54167	distal
chr3-53083448-53084619	1.28746e-09	-0.636263	0.171	0.337	0.00013297	RP11-894J14.5	38904	distal
chr2-98378596-98379606	1.64829e-15	-0.629434	0.208	0.449	1.70237e-10	CNGA3	36868	distal
chr8-41772613-41773137	1.96598e-10	-0.627008	0.078	0.221	2.03048e-05	ANK1	46231	distal
chr9-125513502-125514162	2.42343e-20	-0.623182	0.082	0.316	2.50294e-15	MAPKAP1	39972	distal
chr2-111185577-111186107	4.13196e-15	-0.622108	0.033	0.18	4.26753e-10	BCL2L11	59613	distal
chr1-231065523-231066093	4.84682e-16	-0.619476	0.052	0.221	5.00584e-11	FAM89A	11201	distal
chr19-22621831-22623720	3.05594e-15	-0.616239	0.148	0.374	3.15621e-10	ZNF492	718	distal
chr2-190979769-190980948	2.36085e-13	-0.614443	0.185	0.391	2.43831e-08	STAT1	50284	distal
chr5-154498537-154499042	2.65377e-08	-0.613662	0.065	0.177	0.00274084	HAND1	9073	distal
chr4-145644702-145645110	5.1345e-12	-0.611817	0.047	0.18	5.30296e-07	MMAA	58152	distal
chr3-129461572-129462335	2.92783e-21	-0.607813	0.115	0.376	3.0239e-16	IFT122	44528	distal
chr13-108769421-108769896	2.56674e-14	-0.606901	0.037	0.182	2.65095e-09	MYO16	33080	distal
chr21-46455631-46456191	4.29337e-12	-0.606593	0.067	0.216	4.43423e-07	DIP2A	11917	distal
chr14-96917305-96917923	2.9267e-10	-0.603964	0.073	0.211	3.02273e-05	VRK1	35457	distal
chr10-4867448-4868259	1.12391e-16	-0.603418	0.111	0.333	1.16078e-11	AKR1E2	53446	distal
chr1-92123823-92124283	1.90115e-15	-0.601943	0.045	0.204	1.96352e-10	BTBD8	16955	distal
chr1-116687237-116687909	3.51826e-13	-0.598181	0.045	0.187	3.6337e-08	IGSF3	8582	distal
chr1-57307312-57307888	9.21997e-13	-0.595171	0.065	0.216	9.52247e-08	DAB1	6050	distal
chr13-46343523-46344109	7.25043e-14	-0.59498	0.083	0.257	7.48831e-09	KIAA0226L	54131	distal
chr15-31516387-31516855	1.91621e-13	-0.593768	0.042	0.182	1.97908e-08	OTUD7A	37771	distal
chr5-40801872-40803167	6.02955e-11	-0.591985	0.088	0.235	6.22738e-06	PRKAA1	14639	distal
chr1-179046830-179047836	8.39908e-17	-0.591857	0.175	0.425	8.67466e-12	FAM20B	44320	distal
chr2-216768787-216769663	7.90342e-13	-0.591828	0.088	0.257	8.16273e-08	IGFBP5	23506	distal
chr2-43217611-43222768	2.42341e-21	-0.589026	0.504	0.765	2.50292e-16	ZFP36L2	52445	distal
chr6-7468461-7469187	5.86269e-16	-0.587077	0.03	0.18	6.05504e-11	DSP	23358	distal
chr2-149219707-149220338	9.08891e-13	-0.586336	0.15	0.345	9.38712e-08	LYPD6B	39270	distal
chr7-32200573-32201220	2.5157e-13	-0.585995	0.1	0.284	2.59824e-08	PDE1C	66913	distal
chr5-95712317-95712843	1.74773e-12	-0.585714	0.073	0.228	1.80507e-07	RHOBTB3	7734	distal
chr3-15010689-15011653	2.89731e-10	-0.583487	0.085	0.228	2.99237e-05	NR2C2	61034	distal
chr3-43062178-43063222	7.32371e-13	-0.580441	0.121	0.303	7.564e-08	POMGNT2	53977	distal
chr7-69516118-69516834	2.86155e-15	-0.580441	0.143	0.364	2.95543e-10	AUTS2	24787	distal
chr11-19199670-19200955	3.01658e-14	-0.579702	0.16	0.379	3.11555e-09	CSRP3	33864	distal
chr16-58264836-58265997	1.45461e-14	-0.578838	0.126	0.335	1.50233e-09	CCDC113	38933	distal
chr8-121560634-121561291	3.93251e-12	-0.578795	0.093	0.26	4.06154e-07	HAS2	63625	distal
chr19-21677825-21678584	3.8796e-14	-0.577615	0.03	0.165	4.00689e-09	ZNF100	62015	distal
chr1-245874849-245875526	1.90779e-13	-0.576888	0.105	0.289	1.97038e-08	SMYD3	27322	distal
chr12-30762949-30763492	5.95166e-10	-0.576414	0.085	0.226	6.14693e-05	CAPRIN2	25228	distal
chr5-67234563-67235348	9.5892e-13	-0.573012	0.07	0.226	9.90383e-08	CD180	15533	distal
chr7-106891560-106892250	5.16125e-16	-0.571237	0.058	0.238	5.33059e-11	PIK3CG	47053	distal
chr19-13817294-13818427	3.04792e-13	-0.570736	0.032	0.163	3.14792e-08	ZSWIM4	44787	distal
chr11-19442138-19442709	9.94761e-15	-0.569203	0.055	0.218	1.0274e-09	NAV2	65794	distal
chr2-42926864-42930291	4.09784e-14	-0.569139	0.291	0.524	4.23229e-09	HAAO	3724	distal
chr5-80204638-80206222	1.71857e-16	-0.566466	0.275	0.532	1.77495e-11	SERINC5	56299	distal
chr4-55426608-55427179	3.13505e-11	-0.562979	0.065	0.204	3.23791e-06	TMEM165	49243	distal
chrX-134549014-134551216	3.9958e-12	-0.56291	0.105	0.277	4.12691e-07	HPRT1	65333	distal
chr15-66679578-66680081	2.56773e-10	-0.561146	0.038	0.15	2.65198e-05	SMAD6	9877	distal
chr22-49785830-49786371	1.00948e-12	-0.560239	0.042	0.177	1.0426e-07	BRD1	52454	distal
chr2-159249342-159250711	7.05697e-12	-0.557841	0.106	0.277	7.28851e-07	WDSUB1	51467	distal
chr17-62822144-62822837	1.36371e-10	-0.55757	0.047	0.167	1.40845e-05	2021-03-10	4069	distal
chr6-2857363-2859246	2.53264e-14	-0.556615	0.295	0.546	2.61573e-09	SERPINB1	5413	distal
chr3-123813915-123814253	6.03554e-14	-0.552927	0.02	0.143	6.23357e-09	MYLK	8977	distal
chr12-96500693-96502302	3.68702e-14	-0.551719	0.098	0.284	3.80799e-09	CFAP54	34178	distal
chr19-20051674-20053048	6.92155e-15	-0.551291	0.203	0.437	7.14865e-10	ZNF682	2450	distal
chr17-74037176-74037804	6.36863e-11	-0.551289	0.082	0.231	6.57759e-06	RPL38	6406	distal
chr9-136901641-136902946	8.77873e-14	-0.54951	0.072	0.243	9.06676e-09	TRAF2	39210	distal
chr14-85572244-85572658	1.30785e-12	-0.549341	0.043	0.18	1.35076e-07	FLRT2	53758	distal
chr3-108104129-108104865	7.55772e-14	-0.548439	0.108	0.299	7.80569e-09	CD47	3401	distal
chr3-160012012-160012767	1.16169e-12	-0.547542	0.047	0.187	1.1998e-07	IL12A	45451	distal
chr7-106568718-106569579	3.2577e-13	-0.547499	0.126	0.316	3.36458e-08	CCDC71L	65782	distal
chr4-4323971-4324749	8.49035e-14	-0.546485	0.131	0.33	8.76892e-09	NSG1	10427	distal
chr12-124605214-124606487	1.15405e-12	-0.545768	0.138	0.325	1.19192e-07	NCOR2	22869	distal
chr1-58903227-58904384	2.46544e-09	-0.545681	0.16	0.32	0.000254633	JUN	2140	distal
chr1-212981522-212982863	7.54061e-12	-0.54538	0.06	0.204	7.78802e-07	VASH2	48935	distal
chr15-33313998-33314539	2.27889e-18	-0.54495	0.058	0.257	2.35366e-13	RYR3	48736	distal
chr17-73757274-73757870	2.09988e-13	-0.543496	0.083	0.26	2.16878e-08	SDK2	1522	distal
chr11-57903469-57904840	1.13295e-09	-0.54348	0.087	0.223	0.000117012	OR9Q1	2156	distal
chr2-217887994-217888636	2.45037e-14	-0.54241	0.032	0.17	2.53077e-09	TNS1	39262	distal
chr12-10362971-10365693	6.79318e-13	-0.541625	0.291	0.519	7.01607e-08	KLRK1	45570	distal
chr2-129885698-129886169	5.2746e-12	-0.539682	0.028	0.146	5.44766e-07	RAB6C	26464	distal
chr4-165506758-165507159	2.93349e-12	-0.539674	0.043	0.175	3.02974e-07	CPE	36498	distal
chr20-63836302-63837033	5.27883e-09	-0.538828	0.03	0.124	0.000545203	ZBTB46	18940	distal
chr6-34906970-34907991	5.19018e-11	-0.538416	0.14	0.316	5.36047e-06	ANKS1A	41823	distal
chr4-48729008-48729538	3.00472e-09	-0.538248	0.062	0.18	0.00031033	FRYL	56580	distal
chr1-154386519-154387141	1.02067e-10	-0.5313	0.053	0.182	1.05416e-05	IL6R	7547	distal
chr6-3025624-3027488	2.21534e-08	-0.530519	0.108	0.243	0.00228803	NQO2	44607	distal
chr5-173839124-173839720	4.64517e-15	-0.529605	0.125	0.342	4.79758e-10	CPEB4	18450	distal
chr3-41167597-41168159	1.76818e-10	-0.529519	0.095	0.245	1.8262e-05	CTNNB1	11739	distal
chr3-194140602-194142351	1.58432e-11	-0.527924	0.203	0.398	1.6363e-06	HES1	54624	distal
chr7-1648078-1648725	6.1157e-13	-0.527853	0.115	0.303	6.31635e-08	ELFN1	15995	distal
chr2-148512173-148512984	5.34996e-09	-0.527425	0.146	0.301	0.00055255	MBD5	57433	distal
chr7-12257518-12258148	4.8492e-11	-0.526883	0.035	0.15	5.00831e-06	TMEM106B	55152	distal
chr6-49782205-49783217	8.22755e-12	-0.526033	0.148	0.337	8.4975e-07	PGK2	53345	distal
chr4-105461084-105462443	1.00807e-12	-0.525944	0.168	0.376	1.04114e-07	PPA2	34905	distal
chr9-76650797-76651778	4.94108e-13	-0.525423	0.023	0.143	5.1032e-08	PRUNE2	53165	distal
chr18-2853896-2854801	1.43919e-10	-0.525128	0.173	0.357	1.48641e-05	EMILIN2	61243	distal
chr14-56004691-56005590	1.87204e-10	-0.522104	0.038	0.153	1.93346e-05	PELI2	1475	distal
chr1-48007092-48007549	4.75791e-14	-0.521048	0.027	0.158	4.91402e-09	TRABD2B	236	distal
chr1-62690113-62690866	3.49468e-08	-0.519666	0.133	0.277	0.00360934	DOCK7	7121	distal
chr4-76601764-76602192	1.04909e-13	-0.519461	0.015	0.129	1.08351e-08	SHROOM3	15386	distal
chr4-5385667-5386368	9.43638e-14	-0.519438	0.087	0.262	9.74598e-09	STK32B	27322	distal
chr15-57323755-57324805	8.4059e-11	-0.519198	0.123	0.289	8.6817e-06	CGNL1	19207	distal
chr2-186575192-186575772	7.31495e-15	-0.518716	0.008	0.121	7.55495e-10	ITGAV	4494	distal
chr12-54306481-54307992	9.36405e-12	-0.516933	0.116	0.291	9.67129e-07	NFE2	19636	distal
chr16-12002415-12002978	1.53486e-08	-0.515794	0.08	0.204	0.00158522	SNX29	46858	distal
chr7-64463528-64464243	8.19969e-14	-0.51529	0.022	0.146	8.46872e-09	ZNF680	67031	distal
chr3-4983434-4984684	1.20615e-10	-0.515187	0.045	0.167	1.24573e-05	BHLHE40	54152	distal
chr3-133851319-133851970	7.62627e-13	-0.51512	0.126	0.325	7.87649e-08	RAB6B	54250	distal
chr15-92831340-92832827	1.6831e-14	-0.515107	0.25	0.481	1.73832e-09	RP11-437B10.1	18939	distal
chr3-142222794-142223151	2.98327e-13	-0.514501	0.022	0.141	3.08115e-08	GK5	46271	distal
chr3-169930029-169930643	3.72977e-10	-0.514456	0.083	0.223	3.85215e-05	SAMD7	42469	distal
chr17-56296955-56297735	1.0338e-09	-0.51352	0.068	0.194	0.000106772	ANKFN1	38384	distal
chr3-187366996-187367296	5.1794e-14	-0.513175	0.012	0.124	5.34934e-09	RTP4	424	distal
chrX-1657218-1658433	2.34318e-11	-0.512734	0.097	0.257	2.42006e-06	ASMT	53768	distal
chr16-14971758-14972182	2.43505e-14	-0.512515	0.03	0.167	2.51495e-09	PDXDC1	10741	distal
chr6-77368603-77369332	1.49256e-11	-0.512165	0.018	0.121	1.54153e-06	HTR1B	66327	distal
chr7-26556180-26556750	4.12034e-09	-0.510981	0.078	0.204	0.000425552	SNX10	43113	distal
chr2-231664770-231667613	6.33348e-12	-0.510891	0.271	0.476	6.54128e-07	PTMA	16184	distal
chr7-100061479-100061975	3.17125e-13	-0.510779	0.048	0.194	3.2753e-08	ZSCAN21	35006	distal
chr20-53934282-53935704	1.36577e-12	-0.510706	0.195	0.396	1.41058e-07	BCAS1	37343	distal
chr4-123349233-123350605	5.85289e-14	-0.510681	0.293	0.546	6.04493e-09	SPRY1	17864	distal
chr16-14501437-14502277	1.29232e-09	-0.510352	0.083	0.218	0.000133472	PARN	36514	distal
chr1-109933644-109934688	1.06705e-11	-0.510255	0.043	0.172	1.10206e-06	CSF1	45238	distal
chr9-105063638-105065335	3.45297e-09	-0.509604	0.133	0.284	0.000356626	ABCA1	3836	distal
chr10-114754351-114755019	8.46132e-10	-0.509369	0.068	0.199	8.73894e-05	FAM160B1	22352	distal
chr9-132998552-132999837	2.14485e-12	-0.508724	0.22	0.432	2.21522e-07	GFI1B	35268	distal
chr8-38871828-38872498	1.44132e-14	-0.508688	0.048	0.206	1.48861e-09	PLEKHA2	12542	distal
chr9-130845792-130846233	8.06712e-12	-0.507444	0.042	0.17	8.3318e-07	ABL1	33646	distal
chr13-95202041-95202661	7.20287e-08	-0.507412	0.082	0.199	0.00743919	ABCC4	67007	distal
chr8-85455378-85455901	1.61901e-12	-0.507183	0.073	0.228	1.67213e-07	CA2	24501	distal
chr13-33251021-33251801	1.18489e-12	-0.506407	0.023	0.141	1.22376e-07	STARD13	50696	distal
chr3-143590657-143591107	1.49712e-11	-0.505985	0.063	0.206	1.54624e-06	SLC9A9	27322	distal
chr17-17958054-17958798	4.76657e-13	-0.505917	0.053	0.201	4.92296e-08	TOM1L2	37481	distal
chr17-1114953-1115695	5.94877e-12	-0.505437	0.015	0.117	6.14395e-07	ABR	20710	distal
chr10-96618822-96619678	4.4767e-10	-0.505193	0.16	0.328	4.62358e-05	PIK3AP1	37445	distal
chr4-48481536-48482004	3.04602e-10	-0.504895	0.05	0.17	3.14596e-05	SLC10A4	3690	distal
chr3-15753046-15753702	1.99414e-10	-0.504708	0.083	0.231	2.05956e-05	ANKRD28	54590	distal
chr10-112451531-112451870	5.43846e-12	-0.503989	0.025	0.138	5.61689e-07	VTI1A	53991	distal
chr15-35166676-35167109	6.13231e-09	-0.502385	0.062	0.177	0.000633351	NANOGP8	24804	distal
chr11-73973765-73974610	7.86999e-11	-0.500184	0.078	0.226	8.12821e-06	UCP2	64037	distal
chr19-18020445-18024632	1.62976e-13	-0.499999	0.246	0.473	1.68323e-08	ARRDC2	35849	distal
chr1-10074057-10075708	3.65908e-08	-0.499718	0.17	0.318	0.00377913	UBE4B	53181	distal
chr3-158716845-158717267	2.07856e-11	-0.499611	0.033	0.15	2.14676e-06	RARRES1	39259	distal
chr16-67800187-67800962	1.02833e-07	-0.499395	0.168	0.311	0.0106207	RANBP10	58122	distal
chr17-32136682-32137399	5.53729e-11	-0.499075	0.151	0.333	5.71897e-06	RHOT1	18929	distal
chr8-98306180-98306663	7.88825e-13	-0.498291	0.055	0.204	8.14706e-08	NIPAL2	2029	distal
chr2-189347492-189347871	4.35702e-13	-0.497219	0.02	0.136	4.49998e-08	WDR75	26472	distal
chr2-66443593-66447065	6.02629e-11	-0.496087	0.238	0.434	6.22402e-06	MEIS1	53987	distal
chr12-46521925-46522429	1.90891e-09	-0.49534	0.05	0.163	0.000197154	SLC38A2	5029	distal
chr12-41522085-41522553	1.0034e-11	-0.49532	0.03	0.146	1.03632e-06	PDZRN4	64466	distal
chr14-90720213-90720749	2.76443e-11	-0.495034	0.075	0.223	2.85513e-06	TTC7B	66534	distal
chr1-192986070-192986508	4.45934e-13	-0.494559	0.03	0.158	4.60565e-08	UCHL5	62144	distal
chr10-117408411-117409376	4.30428e-09	-0.494339	0.095	0.233	0.000444551	PDZD8	13988	distal
chr13-108915116-108916525	1.77391e-11	-0.493791	0.063	0.206	1.83211e-06	MYO16	27322	distal
chr10-121462309-121462664	1.47468e-18	-0.493609	0.017	0.17	1.52306e-13	FGFR2	61240	distal
chr8-15323578-15324091	4.3068e-08	-0.493237	0.092	0.214	0.0044481	SGCZ	25349	distal
chr15-33262293-33262761	9.55565e-10	-0.493093	0.093	0.233	9.86917e-05	RYR3	18361	distal
chr9-77531306-77531797	2.68762e-09	-0.493006	0.068	0.194	0.000277581	GNA14	34965	distal
chr1-150484867-150485234	1.25462e-13	-0.491474	0.01	0.117	1.29579e-08	TARS2	9530	distal
chr1-167804970-167805774	5.36337e-10	-0.49137	0.068	0.199	5.53934e-05	MPZL1	64151	distal
chr1-61013155-61013916	1.04757e-10	-0.491343	0.115	0.279	1.08194e-05	NFIA	21721	distal
chr5-119315383-119316159	4.44119e-09	-0.491235	0.063	0.18	0.00045869	TNFAIP8	6769	distal
chr22-25100827-25101536	1.59325e-10	-0.491194	0.123	0.289	1.64553e-05	KIAA1671	354	distal
chr4-110248657-110250071	1.17175e-09	-0.490723	0.15	0.313	0.00012102	ELOVL6	18775	distal
chr17-1730001-1731114	7.9889e-13	-0.490426	0.188	0.403	8.25102e-08	WDR81	56492	distal
chr7-29793472-29793965	5.6761e-13	-0.490396	0.05	0.194	5.86233e-08	WIPF3	2826	distal
chr7-37405611-37406709	4.96168e-10	-0.48995	0.097	0.245	5.12448e-05	ELMO1	53912	distal
chr14-24817644-24818636	6.58213e-10	-0.489663	0.128	0.289	6.79809e-05	STXBP6	64415	distal
chr2-37322349-37322788	1.06184e-10	-0.489659	0.042	0.16	1.09668e-05	PRKD3	17436	distal
chr1-113146620-113147265	3.58924e-08	-0.48956	0.045	0.143	0.003707	LRIG2	62265	distal
chr4-102444661-102445217	3.18059e-13	-0.489387	0.062	0.218	3.28494e-08	NFKB1	20174	distal
chr16-89369240-89369963	7.44428e-11	-0.488887	0.073	0.218	7.68853e-06	ANKRD11	51233	distal
chr12-6612150-6614716	4.23003e-14	-0.488673	0.399	0.643	4.36882e-09	CHD4	15348	distal
chr14-68819169-68821432	4.37238e-08	-0.488592	0.108	0.24	0.00451583	ZFP36L1	10895	distal
chr2-148479294-148479809	1.50689e-09	-0.488478	0.06	0.182	0.000155634	MBD5	44154	distal
chr22-29194009-29194656	2.13555e-08	-0.488305	0.135	0.279	0.00220561	EMID1	1383	distal
chr9-113343503-113344419	1.28659e-12	-0.486997	0.141	0.34	1.32881e-07	WDR31	13751	distal
chr1-110714735-110715144	1.62817e-10	-0.486967	0.035	0.146	1.68159e-05	KCNA3	16084	distal
chr3-41158384-41158981	1.55552e-07	-0.485893	0.06	0.163	0.0160656	CTNNB1	14893	distal
chr15-69114426-69115077	1.52024e-10	-0.485702	0.126	0.296	1.57012e-05	GLCE	17692	distal
chr2-208370819-208371640	8.53335e-12	-0.485671	0.14	0.328	8.81333e-07	PTH2R	34176	distal
chr7-50068022-50070157	4.59269e-10	-0.484914	0.14	0.308	4.74338e-05	ZPBP	45465	distal
chr5-126514819-126515196	1.63177e-09	-0.484379	0.045	0.155	0.000168531	GRAMD3	56258	distal
chr15-92939594-92939927	1.89288e-13	-0.483831	0.025	0.15	1.95498e-08	CHD2	51198	distal
chr6-84062473-84062942	2.82829e-10	-0.482856	0.068	0.201	2.92109e-05	MRAP2	48364	distal
chrX-150546445-150548101	1.41817e-08	-0.482367	0.111	0.248	0.00146471	MTM1	9179	distal
chr19-1872255-1872865	1.18824e-12	-0.482076	0.111	0.296	1.22723e-07	KLF16	25567	distal
chr13-43054721-43055893	1.25662e-08	-0.481474	0.15	0.301	0.00129785	DNAJC15	49635	distal
chr12-29254956-29255662	1.86246e-08	-0.480576	0.082	0.204	0.00192357	FAR2	49496	distal
chr7-78448877-78449381	3.52756e-07	-0.47964	0.078	0.184	0.036433	MAGI2	53201	distal
chr6-7086033-7088429	5.78717e-10	-0.479617	0.083	0.223	5.97705e-05	RREB1	8379	distal
chr14-103923725-103924609	7.82949e-10	-0.478201	0.12	0.279	8.08638e-05	C14orf2	9691	distal
chr19-15782883-15783366	5.71016e-14	-0.47778	0.023	0.15	5.89751e-09	OR10H5	17022	distal
chr10-80410205-80411326	6.99853e-09	-0.477709	0.22	0.396	0.000722815	FAM213A	41223	distal
chr3-160183362-160185523	5.206e-08	-0.477357	0.136	0.274	0.00537681	C3orf80	16158	distal
chr13-49551061-49551780	2.23525e-09	-0.477073	0.047	0.158	0.000230859	RCBTB1	39651	distal
chr12-124490729-124491285	3.04294e-10	-0.476685	0.065	0.197	3.14278e-05	NCOR2	52902	distal
chr6-149209687-149211438	6.86733e-13	-0.476519	0.24	0.476	7.09265e-08	TAB2	726	distal
chr2-10006345-10007326	1.11489e-08	-0.476238	0.11	0.25	0.00115147	GRHL1	34088	distal
chr5-64760189-64760773	7.02829e-08	-0.476152	0.085	0.201	0.00725888	SREK1IP1	63431	distal
chr1-85628938-85629641	1.4718e-10	-0.476014	0.118	0.282	1.52009e-05	CYR61	55792	distal
chr1-32399864-32401272	2.66924e-11	-0.475532	0.075	0.223	2.75682e-06	BSDC1	19756	distal
chr6-31821287-31822912	2.84614e-11	-0.475318	0.178	0.371	2.93952e-06	HSPA1B	18372	distal
chr20-45778882-45779400	2.27348e-10	-0.474885	0.022	0.119	2.34807e-05	WFDC3	33524	distal
chr7-6729187-6730692	2.9575e-10	-0.474379	0.238	0.432	3.05454e-05	ZNF12	9930	distal
chr2-216004390-216007001	1.19561e-10	-0.474281	0.248	0.449	1.23484e-05	MREG	60648	distal
chr15-60127102-60128202	3.03149e-07	-0.473426	0.077	0.184	0.0313096	FOXB1	35866	distal
chr16-22633190-22633784	1.94843e-08	-0.473382	0.088	0.214	0.00201236	NPIPB5	67173	distal
chr3-187586954-187587468	1.5559e-09	-0.47337	0.07	0.201	0.000160695	SST	64165	distal
chr13-28750070-28751410	7.90298e-11	-0.473278	0.176	0.367	8.16228e-06	SLC46A3	13371	distal
chr1-167482314-167482751	1.12356e-07	-0.473079	0.03	0.112	0.0116043	CD247	51451	distal
chr15-82389195-82389756	2.08932e-09	-0.472902	0.1	0.243	0.000215787	GOLGA6L10	16091	distal
chr8-127741855-127743447	4.63171e-10	-0.472639	0.075	0.211	4.78368e-05	MYC	57147	distal
chr12-42076919-42077380	1.78033e-09	-0.47244	0.057	0.175	0.000183874	GXYLT1	60944	distal
chr12-63129867-63130348	1.14987e-08	-0.471647	0.078	0.204	0.0011876	AVPR1A	44119	distal
chr7-100532720-100533765	4.46851e-13	-0.470938	0.115	0.308	4.61512e-08	AGFG2	19856	distal
chr13-46333998-46334524	7.99644e-12	-0.470848	0.052	0.189	8.2588e-07	KIAA0226L	57180	distal
chr22-20697296-20697974	1.69292e-11	-0.468581	0.101	0.269	1.74847e-06	SERPIND1	23944	distal
chr19-21627112-21627810	7.23389e-13	-0.46851	0.067	0.223	7.47124e-08	ZNF429	35654	distal
chr4-182925180-182925748	3.69283e-12	-0.468233	0.06	0.209	3.81399e-07	DCTD	23939	distal
chr2-108986145-108986458	8.8313e-09	-0.468076	0.025	0.112	0.000912105	EDAR	48056	distal
chr5-80191914-80192770	2.92983e-11	-0.468015	0.115	0.284	3.02596e-06	SERINC5	59939	distal
chr14-53108434-53109816	1.46324e-09	-0.467666	0.106	0.257	0.000151125	DDHD1	54179	distal
chr17-19384368-19385469	9.33741e-09	-0.467169	0.125	0.274	0.000964377	MFAP4	38684	distal
chr13-106570259-106570946	4.04584e-10	-0.466434	0.042	0.155	4.17858e-05	ARGLU1	9386	distal
chr2-129894442-129894924	4.85878e-12	-0.466339	0.037	0.163	5.01819e-07	RAB6C	25284	distal
chr12-101963663-101964078	1.22682e-09	-0.46611	0.033	0.136	0.000126707	DRAM1	64776	distal
chr1-180562813-180563327	1.08679e-09	-0.465366	0.035	0.138	0.000112244	ACBD6	20994	distal
chr7-80581871-80582313	2.47155e-10	-0.465232	0.06	0.189	2.55264e-05	CD36	8827	distal
chr8-143293592-143294471	1.3081e-13	-0.465204	0.183	0.408	1.35102e-08	ZNF696	44729	distal
chr9-112149271-112149611	7.57039e-12	-0.464816	0.027	0.141	7.81877e-07	SUSD1	46848	distal
chr4-148273521-148274205	8.55905e-08	-0.464746	0.196	0.354	0.00883987	NR3C2	40406	distal
chr2-184765091-184765965	3.52332e-09	-0.464385	0.065	0.187	0.000363892	ZNF804A	53	distal
chr10-89505788-89506394	4.93586e-10	-0.464384	0.072	0.209	5.09781e-05	SLC16A12	48590	distal
chr2-161243335-161245515	1.10461e-09	-0.464304	0.176	0.352	0.000114085	PSMD14	21542	distal
chr3-64011687-64011992	1.50358e-11	-0.463442	0.027	0.138	1.55292e-06	PSMD6	34697	distal
chr13-52162379-52163126	1.70238e-07	-0.463319	0.067	0.172	0.0175824	NEK3	11173	distal
chr20-50790445-50791259	3.45417e-12	-0.463185	0.121	0.306	3.5675e-07	BCAS4	15086	distal
chr14-56207868-56208214	1.92393e-12	-0.463043	0.012	0.112	1.98705e-07	PELI2	65442	distal
chr19-1106069-1107369	7.41115e-10	-0.462311	0.043	0.158	7.65431e-05	GPX4	38217	distal
chr6-157455687-157456844	2.67124e-09	-0.462119	0.063	0.184	0.000275889	ZDHHC14	62515	distal
chr13-52835102-52835774	4.11133e-07	-0.461928	0.072	0.177	0.0424623	PCDH8	36600	distal
chr1-12448736-12449812	1.76887e-08	-0.461755	0.121	0.262	0.00182691	VPS13D	5218	distal
chr1-149923569-149923981	4.68208e-10	-0.461044	0.037	0.146	4.8357e-05	SF3B4	54310	distal
chr6-156617370-156617952	1.74517e-10	-0.460958	0.052	0.177	1.80243e-05	ARID1B	5892	distal
chr10-88385393-88388838	1.2458e-08	-0.460783	0.265	0.444	0.00128668	RNLS	43333	distal
chr7-76294184-76295294	1.65365e-10	-0.4607	0.097	0.252	1.70791e-05	HSPB1	23374	distal
chr9-35311840-35312415	5.21197e-12	-0.460512	0.115	0.296	5.38298e-07	UNC13B	12793	distal
chr3-158712965-158713767	3.80743e-09	-0.460508	0.126	0.277	0.000393235	RARRES1	42651	distal
chr13-23859791-23860313	4.74033e-11	-0.460483	0.068	0.211	4.89586e-06	MIPEP	48567	distal
chr3-4771939-4772873	1.08793e-07	-0.459824	0.168	0.313	0.0112362	ITPR1	27322	distal
chr7-5472592-5473130	3.40656e-13	-0.458998	0.037	0.172	3.51833e-08	FBXL18	47942	distal
chr7-140267520-140268182	6.74521e-10	-0.458709	0.05	0.167	6.96653e-05	KDM7A	26054	distal
chr10-31972321-31973272	6.98023e-10	-0.458629	0.22	0.415	7.20925e-05	ARHGAP12	17152	distal
chr5-176994454-176995529	1.88758e-12	-0.458419	0.211	0.434	1.94951e-07	UIMC1	33872	distal
chr1-207958560-207960031	2.93894e-08	-0.458142	0.108	0.245	0.00303536	CD34	18102	distal
chr1-117658638-117660330	4.62991e-12	-0.457852	0.105	0.279	4.78182e-07	FAM46C	57177	distal
chr19-58584462-58585462	9.10007e-14	-0.457849	0.105	0.296	9.39864e-09	MZF1	1033	distal
chr4-3305260-3306752	9.18411e-09	-0.457596	0.101	0.24	0.000948544	RGS12	23616	distal
chr6-42030621-42031606	3.10951e-09	-0.457383	0.111	0.257	0.000321154	CCND3	41203	distal
chr17-82738227-82739014	2.53266e-08	-0.457293	0.092	0.221	0.00261575	FN3K	47292	distal
chr14-33612058-33612714	5.39027e-09	-0.456054	0.141	0.301	0.000556713	NPAS3	27322	distal
chr1-227924806-227926007	1.02678e-07	-0.45579	0.067	0.175	0.0106046	WNT9A	44825	distal
chr15-65512714-65513483	1.15163e-10	-0.455594	0.126	0.299	1.18942e-05	DPP8	45533	distal
chr2-143147982-143149163	3.2549e-08	-0.455584	0.068	0.182	0.00336169	ARHGAP15	42644	distal
chr5-145854490-145855359	3.2973e-09	-0.455312	0.235	0.42	0.000340549	GRXCR2	41767	distal
chr1-172456335-172456894	1.39318e-10	-0.454931	0.113	0.279	1.43889e-05	C1orf105	50906	distal
chr2-68357832-68358405	3.00898e-10	-0.454561	0.09	0.235	3.1077e-05	PLEK	22541	distal
chr5-169745986-169746781	4.64068e-13	-0.454532	0.146	0.357	4.79294e-08	DOCK2	53766	distal
chr14-68295113-68295931	4.77256e-08	-0.454494	0.215	0.383	0.00492915	RAD51B	27322	distal
chr3-185068975-185069818	1.65629e-07	-0.454445	0.12	0.25	0.0171063	C3orf70	64220	distal
chr15-49225535-49226068	2.44259e-10	-0.454432	0.035	0.146	2.52273e-05	GALK2	57855	distal
chr6-7164918-7167158	7.18332e-10	-0.454186	0.146	0.316	7.419e-05	RREB1	58370	distal
chr8-37673418-37674080	5.26223e-10	-0.454057	0.161	0.333	5.43488e-05	ZNF703	9686	distal
chr5-99032420-99034666	4.38745e-09	-0.45372	0.103	0.245	0.00045314	CHD1	406	distal
chr13-99496060-99497297	4.82191e-07	-0.453606	0.145	0.279	0.0498011	TM9SF2	6418	distal
chr3-121431939-121432579	5.71303e-09	-0.453441	0.033	0.131	0.000590048	POLQ	34505	distal
chr21-41423267-41424163	2.27387e-07	-0.452949	0.063	0.167	0.0234848	MX1	8003	distal
chr1-160823211-160823754	1.20798e-09	-0.452875	0.088	0.228	0.000124761	LY9	47542	distal
chr7-2105772-2106340	1.09595e-10	-0.452518	0.062	0.197	1.13191e-05	MAD1L1	36010	distal
chr4-88341233-88341704	5.42546e-08	-0.45251	0.04	0.133	0.00560347	HERC6	15303	distal
chr1-234486870-234488541	1.06278e-10	-0.451771	0.118	0.284	1.09765e-05	TARBP1	24227	distal
chr3-196108200-196108916	4.0216e-09	-0.450648	0.075	0.204	0.000415355	TFRC	11507	distal
chr1-198171725-198173161	1.91721e-12	-0.450566	0.135	0.33	1.98011e-07	NEK7	38662	distal
chr5-43772656-43773613	3.95143e-10	-0.450187	0.12	0.279	4.08108e-05	NNT	41064	distal
chr11-70742481-70743037	3.61546e-09	-0.449836	0.092	0.226	0.000373409	SHANK2	24613	distal
chr4-99723454-99724251	6.62322e-10	-0.449618	0.136	0.303	6.84053e-05	RP11-766F14.2	22725	distal
chr11-962594-963089	2.12759e-10	-0.449541	0.085	0.231	2.1974e-05	AP2A2	51796	distal
chr9-33836087-33837524	2.36921e-09	-0.449424	0.033	0.133	0.000244695	UBE2R2	42513	distal
chr5-151749544-151750054	9.51426e-11	-0.449338	0.032	0.143	9.82642e-06	ATOX1	44141	distal
chr2-111182134-111182605	2.05427e-12	-0.44919	0.042	0.175	2.12167e-07	BCL2L11	58753	distal
chr6-5592905-5593301	6.22479e-09	-0.449062	0.03	0.124	0.000642903	FARS2	27322	distal
chr9-127526623-127527353	1.91756e-11	-0.448951	0.053	0.189	1.98047e-06	FAM129B	53660	distal
chr21-29356487-29357389	5.13898e-10	-0.448881	0.125	0.286	5.30759e-05	BACH1	58420	distal
chr5-147216479-147217109	2.23674e-09	-0.448595	0.103	0.245	0.000231013	STK32A	7397	distal
chr5-78587600-78588153	7.13767e-08	-0.448545	0.09	0.209	0.00737186	LHFPL2	15744	distal
chr2-138454772-138455115	2.31444e-09	-0.448519	0.047	0.158	0.000239038	SPOPL	17989	distal
chr6-16472684-16473431	2.76112e-09	-0.448003	0.055	0.172	0.000285171	ATXN1	4638	distal
chr12-122859254-122863464	1.91837e-08	-0.447702	0.186	0.347	0.00198131	HIP1R	45865	distal
chr2-8615669-8616265	3.2255e-09	-0.447523	0.093	0.231	0.000333132	ID2	21551	distal
chr10-70584845-70585939	1.0756e-08	-0.447087	0.083	0.211	0.00111089	PRF1	40872	distal
chr6-10719478-10721581	1.17852e-11	-0.446755	0.141	0.33	1.21718e-06	TMEM14C	3653	distal
chr19-48858566-48860462	9.69761e-10	-0.446746	0.095	0.24	0.000100158	PLEKHA4	63588	distal
chr5-178176844-178177402	1.08416e-08	-0.446574	0.045	0.148	0.00111973	NHP2	10190	distal
chr6-79861028-79861431	4.09121e-09	-0.446419	0.042	0.146	0.000422544	ELOVL4	64809	distal
chr2-208488870-208489845	2.99535e-09	-0.445254	0.165	0.33	0.000309363	PTH2R	64009	distal
chr1-164774506-164775767	4.96123e-08	-0.44476	0.15	0.299	0.00512401	PBX1	6542	distal
chr4-177236623-177237388	4.30451e-08	-0.444416	0.145	0.296	0.00444574	NEIL3	23369	distal
chr5-132190112-132190628	5.22973e-10	-0.444028	0.035	0.143	5.40132e-05	P4HA2	51756	distal
chr3-39637797-39640243	3.84397e-07	-0.443735	0.26	0.415	0.0397009	MYRIP	6652	distal
chr20-57748236-57749725	1.75773e-08	-0.443474	0.077	0.199	0.0018154	PMEPA1	15188	distal
chr9-97051689-97052409	4.21327e-10	-0.443374	0.156	0.33	4.35151e-05	CTSV	2317	distal
chr10-131896285-131898243	1.10208e-10	-0.442537	0.283	0.488	1.13824e-05	PPP2R2D	10700	distal
chr2-208064218-208065108	7.29592e-09	-0.442315	0.06	0.175	0.00075353	PLEKHM3	15791	distal
chr20-51456382-51457309	9.37781e-08	-0.442095	0.067	0.175	0.0096855	NFATC2	64659	distal
chr6-87848897-87849167	7.52197e-12	-0.442058	0.02	0.126	7.76877e-07	AKIRIN2	4820	distal
chr13-31204562-31205024	8.38892e-08	-0.441964	0.03	0.114	0.00866416	B3GLCT	55170	distal
chr5-119059774-119060293	2.70684e-08	-0.441767	0.097	0.226	0.00279565	DMXL1	1273	distal
chr5-96844473-96844908	3.50929e-08	-0.441055	0.03	0.117	0.00362443	ERAP2	13344	distal
chr8-122828131-122828677	2.29824e-10	-0.440711	0.057	0.187	2.37365e-05	ZHX2	55326	distal
chr2-16750162-16750985	2.47124e-07	-0.440291	0.073	0.182	0.0255232	FAM49A	25222	distal
chr7-36746323-36746758	4.66293e-10	-0.440022	0.022	0.117	4.81592e-05	AOAH	9725	distal
chr14-68232447-68233119	4.37258e-09	-0.439939	0.07	0.194	0.000451604	RAD51B	27322	distal
chr8-64756564-64757346	6.13657e-10	-0.439682	0.037	0.146	6.33791e-05	CYP7B1	53543	distal
chr5-76372266-76373049	1.07745e-11	-0.439591	0.063	0.211	1.1128e-06	IQGAP2	13072	distal
chr7-146728604-146729062	8.29247e-10	-0.439497	0.063	0.189	8.56455e-05	CNTNAP2	27322	distal
chr1-245337763-245338444	2.13329e-08	-0.439457	0.07	0.189	0.00220328	KIF26B	6963	distal
chr5-50744691-50745227	1.84001e-12	-0.439299	0.025	0.143	1.90038e-07	PARP8	63023	distal
chr20-4090725-4092237	4.39535e-10	-0.439258	0.195	0.379	4.53956e-05	SMOX	20271	distal
chr19-34645462-34645997	9.64464e-08	-0.439	0.043	0.138	0.00996108	SCGB2B2	48813	distal
chr10-28366920-28368670	1.51762e-07	-0.438692	0.123	0.255	0.0156741	MPP7	25288	distal
chr17-62994975-62996578	3.63042e-09	-0.43841	0.215	0.396	0.000374953	TANC2	3271	distal
chr12-123115347-123116168	8.46763e-10	-0.437536	0.052	0.17	8.74545e-05	PITPNM2	18445	distal
chr2-186927665-186928150	1.56363e-10	-0.437529	0.045	0.165	1.61493e-05	ZSWIM2	24349	distal
chr17-82289861-82290636	6.26012e-09	-0.437215	0.116	0.26	0.000646551	CSNK1D	6037	distal
chr4-81260532-81261048	5.24596e-13	-0.436143	0.03	0.158	5.41808e-08	PRKG2	17651	distal
chr16-10828609-10829513	2.06843e-08	-0.435718	0.063	0.177	0.0021363	TVP23A	27101	distal
chr5-61319252-61320293	4.20069e-08	-0.435381	0.052	0.155	0.00433851	ZSWIM6	2237	distal
chr17-19270804-19271530	3.22325e-09	-0.435327	0.148	0.316	0.0003329	EPN2	501	distal
chr10-42654429-42654855	7.0656e-08	-0.434957	0.058	0.16	0.00729742	ZNF33B	5844	distal
chr1-633787-634270	1.33305e-08	-0.434566	0.105	0.243	0.00137679	OR4F16	57085	distal
chr1-46673676-46674097	8.94158e-10	-0.434298	0.035	0.141	9.23496e-05	TEX38	42067	distal
chr8-19485473-19485870	1.15841e-08	-0.43427	0.042	0.143	0.00119642	CSGALNACT1	34893	distal
chr19-48398223-48400638	1.05189e-08	-0.434248	0.246	0.427	0.0010864	GRIN2D	50493	distal
chr7-17355059-17355446	4.61152e-08	-0.433586	0.043	0.138	0.00476283	RP11-507K12.1	58071	distal
chr10-96482792-96483317	2.4601e-10	-0.43352	0.063	0.194	2.54081e-05	TLL2	49210	distal
chr19-40433358-40434562	9.81873e-09	-0.433029	0.14	0.291	0.00101409	SERTAD1	23525	distal
chr21-17554640-17555370	4.42846e-07	-0.432937	0.176	0.318	0.0457376	CXADR	53584	distal
chr13-75963265-75963822	2.31314e-07	-0.431571	0.063	0.165	0.0238904	C13orf45	65934	distal
chr1-200245481-200245816	7.06844e-10	-0.431505	0.032	0.136	7.30035e-05	ZNF281	40554	distal
chr12-95173730-95174415	6.90598e-10	-0.431378	0.092	0.238	7.13257e-05	FGD6	54070	distal
chr6-16513962-16514769	2.25142e-08	-0.431343	0.072	0.187	0.00232529	ATXN1	7924	distal
chr22-25154050-25154721	5.69243e-09	-0.431274	0.06	0.177	0.000587919	KIAA1671	53817	distal
chr6-159832819-159833454	6.11627e-08	-0.430306	0.131	0.274	0.00631694	PNLDC1	50083	distal
chr4-46081536-46082186	4.16763e-09	-0.429873	0.136	0.296	0.000430437	GABRG1	53709	distal
chr4-39808255-39808632	1.21388e-08	-0.429636	0.03	0.121	0.00125371	UBE2K	34039	distal
chr12-6335232-6338295	8.86599e-08	-0.429209	0.296	0.471	0.00915688	TNFRSF1A	51350	distal
chr3-44926877-44927733	2.51712e-07	-0.42851	0.12	0.245	0.0259971	ZDHHC3	55874	distal
chr14-20799271-20800735	7.29517e-08	-0.428183	0.185	0.34	0.00753452	RNASE1	40841	distal
chr8-23508670-23509532	2.69975e-08	-0.427118	0.082	0.204	0.00278833	SLC25A37	8447	distal
chr13-95209065-95209573	4.69379e-08	-0.427079	0.082	0.201	0.00484779	ABCC4	65843	distal
chr3-159929247-159930220	7.96392e-09	-0.426973	0.077	0.204	0.000822521	IL12A	20707	distal
chr2-33122630-33123177	2.74705e-09	-0.426744	0.103	0.25	0.000283718	LTBP1	1630	distal
chr16-68731875-68732519	1.903e-10	-0.426341	0.083	0.231	1.96544e-05	CDH1	18082	distal
chr16-86046604-86047323	3.8939e-09	-0.426098	0.093	0.233	0.000402166	IRF8	37063	distal
chr4-70996970-70997915	2.81952e-08	-0.424547	0.052	0.158	0.00291203	DCK	50420	distal
chr10-846098-846731	3.05444e-11	-0.42412	0.057	0.194	3.15465e-06	LARP4B	52675	distal
chr4-184385708-184387087	1.76889e-09	-0.423747	0.15	0.313	0.000182693	IRF2	65065	distal
chr2-6847077-6847794	1.40214e-10	-0.423741	0.175	0.364	1.44814e-05	CMPK2	42000	distal
chr6-6699781-6700529	1.37426e-08	-0.423089	0.111	0.25	0.00141935	LY86	34185	distal
chr10-5291459-5292424	1.68852e-09	-0.422551	0.095	0.238	0.000174392	UCN3	23387	distal
chr15-41241077-41241788	4.09127e-10	-0.421739	0.072	0.206	4.22551e-05	CHP1	66882	distal
chr12-41527412-41528123	1.03594e-10	-0.421574	0.143	0.323	1.06992e-05	PDZRN4	65473	distal
chr2-201125176-201128032	8.44384e-10	-0.421506	0.281	0.481	8.72088e-05	CFLAR	4860	distal
chr14-24256101-24257127	3.06545e-08	-0.421493	0.226	0.398	0.00316603	TGM1	59285	distal
chr8-143933530-143934649	1.3282e-08	-0.421448	0.233	0.413	0.00137178	PLEC	56167	distal
chr9-33172158-33172653	3.54958e-08	-0.421299	0.043	0.141	0.00366604	B4GALT1	18317	distal
chr5-76363547-76364486	2.92099e-08	-0.421292	0.166	0.325	0.00301683	IQGAP2	15819	distal
chr20-49302930-49303681	6.18612e-09	-0.421085	0.048	0.158	0.000638909	ZNFX1	10913	distal
chr9-137150311-137151924	4.54543e-08	-0.421082	0.248	0.413	0.00469456	GRIN1	33802	distal
chr15-48580128-48580823	3.72729e-10	-0.420956	0.106	0.262	3.84958e-05	FBN1	60349	distal
chr9-41273104-41274466	1.04649e-07	-0.420893	0.101	0.226	0.0108083	CBWD6	25128	distal
chr6-119480095-119480709	1.91822e-07	-0.420794	0.077	0.187	0.0198116	MAN1A1	3324	distal
chr17-43584763-43585043	2.25028e-10	-0.420215	0.027	0.129	2.32411e-05	ETV4	15705	distal
chr3-127886407-127887149	7.67188e-10	-0.419833	0.083	0.223	7.92359e-05	KBTBD12	12286	distal
chr17-54861070-54861538	1.97741e-09	-0.419641	0.05	0.165	0.000204229	TOM1L1	15556	distal
chr3-128094541-128095613	3.12013e-07	-0.419576	0.115	0.24	0.0322251	RUVBL1	48115	distal
chr3-129056597-129057304	1.52758e-07	-0.419246	0.123	0.257	0.015777	GP9	14527	distal
chr5-149912434-149914172	6.07268e-10	-0.419036	0.196	0.383	6.27192e-05	PDE6A	49227	distal
chr12-7293597-7294095	1.08073e-07	-0.418922	0.063	0.17	0.0111619	ACSM4	224	distal
chr6-20112257-20113303	3.80599e-09	-0.418881	0.077	0.206	0.000393086	MBOAT1	67084	distal
chr12-116532645-116534876	2.36321e-09	-0.418868	0.18	0.359	0.000244075	MAP1LC3B2	10913	distal
chrY-21240377-21240578	1.07652e-17	-0.418427	0	0.117	1.11184e-12	PRORY	38627	distal
chr3-24351815-24352252	2.74954e-09	-0.417636	0.047	0.158	0.000283975	THRB	37280	distal
chr2-181367402-181367801	3.18314e-08	-0.41757	0.05	0.153	0.00328758	ITGA4	25915	distal
chr2-226837721-226838348	2.58421e-07	-0.417106	0.09	0.204	0.02669	RHBDD1	41787	distal
chr15-59696365-59696689	9.76368e-11	-0.416698	0.033	0.146	1.0084e-05	BNIP2	22645	distal
chr1-155011948-155012481	4.63028e-08	-0.416477	0.023	0.104	0.0047822	ZBTB7B	8711	distal
chr2-88585029-88585486	2.78499e-08	-0.416186	0.063	0.175	0.00287636	EIF2AK3	52821	distal
chr13-93454632-93455294	3.09328e-10	-0.416011	0.018	0.112	3.19477e-05	GPC6	27322	distal
chr9-613575-614842	4.48299e-08	-0.415795	0.191	0.357	0.00463007	KANK1	26246	distal
chr6-10724757-10725605	7.39704e-09	-0.415784	0.153	0.318	0.000763974	TMEM14C	41937	distal
chr4-48681045-48682220	4.64821e-08	-0.414311	0.12	0.257	0.00480072	FRYL	17976	distal
chr9-626565-627614	1.35363e-08	-0.413947	0.038	0.136	0.00139805	KANK1	24461	distal
chr2-43059093-43060072	3.99456e-10	-0.413778	0.06	0.189	4.12562e-05	ZFP36L2	40788	distal
chr1-44812716-44814284	1.31686e-07	-0.413485	0.131	0.265	0.0136007	BTBD19	53729	distal
chr15-89079950-89080880	2.46964e-10	-0.413404	0.141	0.311	2.55067e-05	ABHD2	23403	distal
chr17-51429067-51430390	4.0044e-07	-0.413401	0.125	0.25	0.0413579	UTP18	40983	distal
chr19-56125797-56126301	1.15027e-07	-0.413195	0.082	0.197	0.0118801	ZNF787	17587	distal
chr1-111481563-111482125	2.00814e-07	-0.413166	0.058	0.16	0.0207403	C1orf162	62993	distal
chr14-37168663-37169192	3.9854e-08	-0.413073	0.078	0.199	0.00411616	SLC25A21	49973	distal
chr1-173436075-173436386	9.76173e-11	-0.412933	0.023	0.126	1.0082e-05	PRDX6	16437	distal
chr19-29815075-29815774	4.41861e-08	-0.412893	0.083	0.204	0.00456359	CCNE1	46093	distal
chr17-76772794-76773231	9.05545e-08	-0.412884	0.037	0.126	0.00935256	MFSD11	51023	distal
chr14-22427540-22429439	1.83007e-07	-0.41281	0.092	0.209	0.0189011	TRDV2	56876	distal
chr1-54396147-54397727	4.79585e-10	-0.411944	0.276	0.483	4.9532e-05	SSBP3	63152	distal
chr19-48479804-48481397	6.39251e-08	-0.411881	0.131	0.272	0.00660225	CYTH2	55424	distal
chr11-75534172-75535568	1.74747e-07	-0.411547	0.285	0.456	0.0180481	GDPD5	24981	distal
chr1-84103220-84103850	2.59593e-08	-0.411418	0.095	0.226	0.00268111	PRKACB	46553	distal
chr1-19112868-19114032	2.51091e-07	-0.410371	0.125	0.257	0.0259329	UBR4	55789	distal
chr2-222930948-222931308	3.15714e-07	-0.409728	0.032	0.112	0.0326073	ACSL3	61542	distal
chr1-65292727-65293692	2.56154e-10	-0.409538	0.336	0.556	2.64558e-05	DNAJC6	5813	distal
chr1-209645741-209646159	3.4646e-12	-0.408704	0.032	0.155	3.57827e-07	LAMB3	56892	distal
chr15-85329446-85331626	7.26179e-11	-0.40812	0.118	0.289	7.50005e-06	AKAP13	18552	distal
chr20-1900269-1900786	2.9339e-07	-0.40811	0.052	0.146	0.0303016	SIRPA	56286	distal
chr6-111424185-111424835	1.06234e-07	-0.408043	0.055	0.155	0.010972	REV3L	58750	distal
chr6-4727453-4728515	6.12528e-11	-0.407603	0.273	0.5	6.32625e-06	CDYL	44514	distal
chr16-50070988-50071497	9.52433e-11	-0.407488	0.065	0.201	9.83682e-06	HEATR3	56512	distal
chr7-112391084-112392369	3.50973e-09	-0.407446	0.047	0.155	0.000362489	IFRD1	13256	distal
chrX-47675779-47676387	1.95398e-08	-0.406818	0.087	0.209	0.00201809	UXT	6451	distal
chr3-196179367-196180472	2.42565e-07	-0.406617	0.126	0.257	0.0250523	ZDHHC19	49372	distal
chr16-73035895-73038268	1.41561e-07	-0.406463	0.263	0.427	0.0146206	ZFHX3	32701	distal
chr6-158200569-158201706	1.14957e-10	-0.406404	0.131	0.306	1.18729e-05	GTF2H5	49940	distal
chr20-1912069-1912455	9.16988e-08	-0.406259	0.038	0.129	0.00947075	SIRPA	40899	distal
chr4-183241138-183241888	3.45259e-07	-0.406036	0.12	0.245	0.0356587	WWC2	49911	distal
chr4-83495978-83496617	1.22365e-07	-0.406033	0.092	0.211	0.0126379	FAM175A	500	distal
chr4-55386116-55387383	6.12284e-12	-0.405433	0.12	0.303	6.32373e-07	TMEM165	25420	distal
chr3-173913293-173913881	3.50086e-10	-0.40477	0.11	0.269	3.61573e-05	NLGN1	27322	distal
chr2-106921478-106921785	2.30132e-11	-0.404115	0.037	0.158	2.37682e-06	ST6GAL2	14441	distal
chr3-33900911-33901341	5.04337e-09	-0.403951	0.048	0.16	0.000520884	PDCD6IP	32900	distal
chr8-67109832-67110194	1.94778e-08	-0.403894	0.035	0.129	0.00201168	CSPP1	47006	distal
chr6-14166709-14167379	4.58527e-08	-0.403681	0.108	0.245	0.00473571	CD83	56068	distal
chr11-33881216-33882567	4.30234e-10	-0.403508	0.13	0.299	4.4435e-05	LMO2	66789	distal
chr13-44386696-44387535	1.84787e-07	-0.403002	0.238	0.403	0.019085	SERP2	36584	distal
chr16-8646247-8647065	6.23392e-10	-0.402365	0.101	0.252	6.43845e-05	METTL22	46248	distal
chr11-36253071-36253700	1.2451e-08	-0.402355	0.075	0.199	0.00128596	COMMD9	51425	distal
chr7-69422578-69423204	1.18059e-09	-0.402109	0.135	0.303	0.000121933	AUTS2	7150	distal
chr22-42751738-42752606	1.11618e-07	-0.401858	0.073	0.184	0.0115281	A4GALT	13274	distal
chr7-106986469-106987003	2.22174e-12	-0.401708	0.062	0.214	2.29463e-07	PRKAR2B	20514	distal
chr7-102441440-102442193	2.98315e-07	-0.401174	0.15	0.289	0.0308103	ORAI2	56795	distal
chr4-183987661-183988532	4.21189e-08	-0.401136	0.033	0.121	0.00435009	STOX2	64055	distal
chr2-208571581-208572231	1.32948e-07	-0.400932	0.103	0.231	0.013731	PTH2R	40612	distal
chr2-142868126-142868771	1.41656e-07	-0.400842	0.085	0.201	0.0146303	KYNU	25623	distal
chr6-119442568-119443472	4.15737e-09	-0.400276	0.037	0.138	0.000429377	MAN1A1	26360	distal
chr2-75310786-75311312	1.17474e-07	-0.400239	0.078	0.192	0.0121328	TACR1	1289	distal
chr16-78116953-78117847	2.69627e-08	-0.400007	0.123	0.267	0.00278474	WWOX	41371	distal
chr2-101440041-101440490	5.87837e-08	-0.399783	0.05	0.15	0.00607124	RFX8	50718	distal
chr5-10294605-10295179	4.57471e-07	-0.399423	0.108	0.228	0.047248	CMBL	36574	distal
chr1-202944332-202945088	3.12914e-09	-0.399038	0.143	0.311	0.000323181	ADIPOR1	36963	distal
chr14-55974317-55974675	1.02564e-10	-0.39828	0.015	0.107	1.05929e-05	PELI2	4567	distal
chr6-111804532-111806100	7.98021e-08	-0.397989	0.141	0.284	0.00824204	FYN	763	distal
chr15-40559014-40559793	4.68024e-08	-0.397989	0.165	0.32	0.0048338	C15orf57	56929	distal
chr5-139232079-139232744	9.70243e-08	-0.397578	0.143	0.289	0.0100208	SIL1	14222	distal
chr7-80680398-80681641	1.84253e-10	-0.397546	0.111	0.272	1.90298e-05	CD36	50745	distal
chr14-93748003-93749136	3.89634e-11	-0.397419	0.283	0.507	4.02418e-06	PRIMA1	52517	distal
chr15-33425132-33425481	6.39307e-08	-0.396708	0.042	0.136	0.00660283	RYR3	34613	distal
chr3-42166627-42167429	5.8186e-08	-0.396448	0.206	0.371	0.0060095	TRAK1	60271	distal
chr13-41463024-41466066	3.25561e-09	-0.39636	0.266	0.468	0.000336243	RGCC	57736	distal
chr21-38766836-38767870	1.418e-09	-0.396053	0.063	0.189	0.000146452	ETS2	15420	distal
chr11-95337175-95338664	6.40079e-08	-0.395768	0.043	0.141	0.0066108	SESN3	549	distal
chr8-140302190-140303040	5.54894e-08	-0.395448	0.077	0.194	0.005731	TRAPPC9	39578	distal
chr7-5839062-5839568	6.18296e-09	-0.395333	0.06	0.177	0.000638582	OCM	16236	distal
chr9-5891762-5892886	5.11133e-09	-0.395249	0.05	0.163	0.000527903	MLANA	64415	distal
chr1-61116272-61116777	4.10674e-12	-0.395138	0.062	0.211	4.24148e-07	NFIA	50506	distal
chr1-61299398-61299852	4.72206e-10	-0.394584	0.028	0.129	4.87699e-05	NFIA	499	distal
chr13-27595044-27595576	4.22262e-07	-0.394189	0.09	0.206	0.0436116	LNX2	46417	distal
chr1-36411725-36412432	7.62907e-09	-0.393709	0.12	0.267	0.000787938	LSM10	4095	distal
chr13-29384475-29384905	4.19527e-07	-0.392947	0.055	0.15	0.0433291	MTUS2	17218	distal
chr10-6239108-6239713	1.36221e-08	-0.392679	0.045	0.148	0.0014069	PFKFB3	51591	distal
chr2-221443957-221444543	2.33829e-09	-0.392615	0.05	0.165	0.000241501	EPHA4	36490	distal
chr3-196047841-196048475	1.56246e-08	-0.392388	0.022	0.104	0.00161372	TFRC	50542	distal
chr9-87810571-87811225	9.81797e-10	-0.39177	0.14	0.306	0.000101401	SPATA31E1	23203	distal
chr19-21197497-21198276	7.77023e-10	-0.391746	0.118	0.277	8.02517e-05	ZNF431	57975	distal
chr11-44780804-44781981	1.20914e-10	-0.391692	0.26	0.471	1.24881e-05	TSPAN18	40511	distal
chr15-65521322-65521792	2.49333e-07	-0.391672	0.055	0.153	0.0257513	DPP8	15034	distal
chr7-66535862-66536547	6.21793e-09	-0.391417	0.088	0.221	0.000642194	KCTD7	26275	distal
chr5-134510897-134511756	2.13907e-09	-0.391042	0.03	0.129	0.000220925	JADE2	4154	distal
chr9-70418131-70422157	1.32773e-10	-0.390938	0.671	0.813	1.37129e-05	KLF9	14665	distal
chr1-236351907-236352320	2.51775e-07	-0.390777	0.058	0.158	0.0260035	EDARADD	51716	distal
chr14-68143127-68144651	6.63195e-08	-0.390598	0.221	0.381	0.00684954	RAD51B	27322	distal
chr16-82152408-82153296	1.3278e-09	-0.390196	0.037	0.143	0.000137136	MPHOSPH6	41022	distal
chr2-7022639-7023895	4.47941e-10	-0.390195	0.123	0.289	4.62638e-05	RNF144A	33355	distal
chr20-38159888-38160475	3.45098e-07	-0.389929	0.08	0.189	0.0356421	TGM2	56038	distal
chr1-33275011-33275615	1.39195e-08	-0.389905	0.078	0.204	0.00143762	ZNF362	54560	distal
chr9-70120461-70121327	9.21015e-08	-0.389863	0.24	0.413	0.00951234	MAMDC2	62978	distal
chr3-185175308-185175985	3.22804e-07	-0.389691	0.106	0.228	0.0333395	C3orf70	9945	distal
chr19-15868872-15869768	7.55471e-08	-0.389485	0.072	0.184	0.00780258	CYP4F2	48151	distal
chr14-81023080-81023609	3.63372e-08	-0.38899	0.077	0.197	0.00375294	TSHR	60962	distal
chr11-75714217-75714691	9.38322e-08	-0.388973	0.065	0.172	0.00969109	MOGAT2	13436	distal
chr2-225456640-225457011	1.55154e-09	-0.388894	0.04	0.148	0.000160245	NYAP2	58069	distal
chr17-22521161-22521724	4.6503e-08	-0.388807	0.123	0.262	0.00480288	MTRNR2L1	4121	distal
chr1-232962999-232963871	4.95303e-08	-0.388797	0.062	0.172	0.00511554	NTPCR	35951	distal
chr22-42316938-42317460	3.98871e-08	-0.388208	0.062	0.172	0.00411958	TCF20	182	distal
chr19-35330416-35330823	1.90952e-07	-0.387577	0.025	0.102	0.0197217	CD22	2178	distal
chr7-30925979-30926958	2.60409e-08	-0.387387	0.231	0.41	0.00268953	AQP1	54734	distal
chr3-127860036-127860631	1.51229e-07	-0.387045	0.108	0.233	0.0156191	MGLL	15221	distal
chr6-39221892-39222787	1.33777e-07	-0.386847	0.128	0.26	0.0138166	KCNK5	60766	distal
chr10-4981734-4982543	6.55855e-08	-0.386785	0.128	0.269	0.00677374	AKR1C1	42028	distal
chr2-129906645-129907382	1.72417e-07	-0.386495	0.118	0.245	0.0178074	RAB6C	23342	distal
chr1-94325405-94325786	3.51132e-09	-0.386401	0.032	0.129	0.000362652	ARHGAP29	25676	distal
chr4-167079612-167080258	7.48492e-08	-0.385863	0.16	0.311	0.0077305	SPOCK3	45040	distal
chr13-75788283-75789136	1.02027e-09	-0.38527	0.173	0.352	0.000105375	LMO7	47828	distal
chr2-109176866-109177398	7.2409e-08	-0.385174	0.08	0.194	0.00747848	SH3RF3	55584	distal
chr16-49697812-49699090	2.03362e-11	-0.385165	0.268	0.5	2.10034e-06	ZNF423	14189	distal
chr8-118528512-118529232	3.34764e-07	-0.384776	0.121	0.25	0.0345748	SAMD12	66025	distal
chr3-39592435-39593124	2.87452e-10	-0.384775	0.101	0.257	2.96883e-05	MOBP	36093	distal
chr19-57272987-57273464	2.29327e-08	-0.384712	0.06	0.17	0.00236851	ZNF460	22191	distal
chr6-108904636-108905297	1.66345e-10	-0.384694	0.038	0.153	1.71803e-05	ARMC2	58182	distal
chr8-117172151-117172729	2.08563e-08	-0.384409	0.118	0.262	0.00215405	SLC30A8	51835	distal
chr13-101612544-101613212	1.09787e-09	-0.383689	0.145	0.313	0.000113389	ITGBL1	35823	distal
chr6-20826451-20826737	1.32742e-11	-0.383564	0.025	0.136	1.37097e-06	CDKAL1	27322	distal
chr20-31949850-31950720	3.56936e-09	-0.383437	0.131	0.291	0.000368647	PDRG1	37623	distal
chr2-72901281-72901895	2.28833e-07	-0.38317	0.095	0.211	0.0236341	SPR	37868	distal
chr5-88836435-88836937	1.63609e-09	-0.383137	0.053	0.172	0.000168977	MEF2C	674	distal
chr7-8232828-8233815	2.29171e-07	-0.382788	0.206	0.371	0.023669	ICA1	44417	distal
chr1-170067089-170068003	4.01617e-08	-0.382768	0.205	0.374	0.00414794	KIFAP3	65791	distal
chr3-115099813-115100999	1.39756e-08	-0.382594	0.077	0.199	0.00144342	ZBTB20	12424	distal
chr7-129066826-129067530	1.16781e-09	-0.382563	0.052	0.17	0.000120613	TNPO3	1891	distal
chr15-38554352-38554762	2.91687e-08	-0.381784	0.037	0.131	0.00301257	RASGRP1	67019	distal
chr1-2345583-2346089	5.44292e-08	-0.381051	0.068	0.182	0.0056215	MORN1	54976	distal
chr15-68704320-68705026	5.27494e-10	-0.380834	0.143	0.318	5.44801e-05	CORO2B	62044	distal
chr15-38323935-38324251	1.93148e-08	-0.380073	0.038	0.136	0.00199485	SPRED1	61884	distal
chr9-5863376-5863663	3.46381e-11	-0.379832	0.015	0.112	3.57746e-06	MLANA	11940	distal
chr1-109126682-109127290	7.10455e-09	-0.379489	0.092	0.226	0.000733765	KIAA1324	36155	distal
chr5-157115911-157116373	2.58737e-07	-0.379371	0.067	0.17	0.0267226	HAVCR2	21427	distal
chr12-95462729-95463518	8.55006e-10	-0.378888	0.077	0.216	8.83059e-05	METAP2	510	distal
chr7-134639816-134640286	5.50357e-08	-0.378881	0.065	0.175	0.00568415	BPGM	22071	distal
chr2-111705380-111706859	2.1248e-08	-0.37865	0.123	0.265	0.00219451	ANAPC1	41511	distal
chr15-88628205-88628602	1.67288e-07	-0.378601	0.037	0.124	0.0172777	AEN	61337	distal
chr16-56854206-56854571	3.03539e-07	-0.377547	0.035	0.119	0.0313499	SLC12A3	752	distal
chr5-66620633-66621383	2.63432e-07	-0.377107	0.136	0.272	0.0272075	MAST4	45958	distal
chr6-38795587-38796908	1.88184e-08	-0.376461	0.13	0.277	0.00194359	DNAH8	62071	distal
chr5-112548038-112548972	1.14702e-08	-0.376222	0.293	0.485	0.00118466	EPB41L4A	3174	distal
chr5-54325408-54326239	2.22109e-08	-0.37617	0.193	0.359	0.00229396	ARL15	4962	distal
chr1-26677282-26678049	1.41107e-07	-0.376084	0.075	0.187	0.0145737	ARID1A	5267	distal
chr2-170937647-170938166	4.03266e-07	-0.375417	0.087	0.199	0.0416497	GORASP2	65755	distal
chr3-149151801-149152813	4.95258e-08	-0.375055	0.037	0.129	0.00511507	HPS3	44967	distal
chr11-5151628-5152205	1.07711e-07	-0.374868	0.1	0.228	0.0111245	OR52A1	40536	distal
chr20-3897178-3897627	8.37211e-09	-0.374274	0.037	0.136	0.00086468	PANK2	62305	distal
chrX-155434897-155435408	1.06276e-07	-0.37382	0.047	0.143	0.0109763	F8A3	45561	distal
chr17-55440383-55440920	1.00321e-07	-0.373812	0.062	0.167	0.0103612	MMD	7795	distal
chr1-167543105-167543871	1.73842e-09	-0.373604	0.095	0.238	0.000179546	CREG1	67057	distal
chr8-65948267-65949325	6.77773e-08	-0.373579	0.058	0.165	0.00700011	DNAJC5B	23326	distal
chr10-61835136-61836456	2.0284e-09	-0.373073	0.088	0.226	0.000209495	ARID5B	21988	distal
chr10-44856565-44858170	2.52826e-07	-0.372716	0.233	0.391	0.0261121	TMEM72	19541	distal
chr8-108468429-108469229	1.3038e-07	-0.37238	0.038	0.129	0.0134658	EMC2	46408	distal
chr2-149538362-149538593	1.19742e-09	-0.372215	0.025	0.119	0.00012367	MMADHC	56050	distal
chr19-944033-945069	1.00753e-09	-0.372187	0.151	0.328	0.000104058	ARID3A	42074	distal
chr7-20698466-20698932	3.53648e-08	-0.371962	0.082	0.204	0.00365251	ABCB5	56680	distal
chr14-58634815-58635353	2.09218e-09	-0.371597	0.032	0.131	0.000216082	DACT1	62565	distal
chr7-2732810-2739004	9.41693e-11	-0.371493	0.537	0.74	9.7259e-06	GNA12	46036	distal
chr11-86173907-86174937	1.13065e-07	-0.371465	0.123	0.26	0.0116775	EED	22867	distal
chr5-88888580-88890746	1.82814e-08	-0.371433	0.23	0.408	0.00188812	MEF2C	18397	distal
chr5-101084340-101084741	1.00368e-09	-0.371388	0.057	0.18	0.000103661	ST8SIA4	7583	distal
chr3-46427795-46428326	3.19105e-08	-0.370701	0.055	0.163	0.00329575	CCRL2	43712	distal
chr5-151201145-151201619	1.43197e-07	-0.370364	0.062	0.165	0.0147895	CCDC69	45168	distal
chr2-148162861-148163268	1.597e-08	-0.370177	0.06	0.172	0.00164939	MBD5	5481	distal
chr17-57442788-57443786	6.65525e-08	-0.369842	0.078	0.197	0.00687361	MSI2	38882	distal
chr18-13522279-13522624	2.39324e-10	-0.369779	0.032	0.141	2.47176e-05	LDLRAD4	25827	distal
chr3-48915299-48915776	3.51886e-07	-0.369574	0.045	0.133	0.0363432	ARIH2	13151	distal
chr16-50312770-50314345	5.49712e-09	-0.369468	0.16	0.33	0.000567748	ADCY7	46435	distal
chr18-79526117-79527287	7.32342e-11	-0.36927	0.088	0.243	7.5637e-06	NFATC1	36223	distal
chr17-28801218-28801700	4.48992e-08	-0.369267	0.057	0.165	0.00463724	C17orf63	33354	distal
chr18-4196394-4196743	3.50417e-07	-0.369206	0.048	0.141	0.0361914	DLGAP1	17567	distal
chr17-27613335-27613949	3.98049e-09	-0.36856	0.085	0.221	0.000411109	KSR1	51109	distal
chr20-19510495-19511138	8.65281e-11	-0.368418	0.156	0.34	8.93671e-06	SLC24A3	27322	distal
chr16-75509304-75510258	4.27982e-08	-0.368238	0.235	0.405	0.00442024	CHST6	4169	distal
chr2-157898609-157899651	8.84791e-08	-0.367016	0.043	0.138	0.00913821	UPP2	44834	distal
chr3-183447047-183448441	2.40177e-07	-0.366981	0.248	0.417	0.0248057	MCF2L2	8072	distal
chr21-33947455-33949230	2.91678e-07	-0.366616	0.193	0.345	0.0301248	AP000304.12	5809	distal
chr1-15627571-15628399	1.27038e-08	-0.366446	0.106	0.245	0.00131206	DDI2	32637	distal
chr7-100065222-100066009	4.01435e-09	-0.366373	0.118	0.272	0.000414606	ZNF3	36941	distal
chr18-45938891-45939748	1.74943e-07	-0.366249	0.128	0.26	0.0180683	EPG5	47785	distal
chr5-68367168-68367788	1.00017e-07	-0.365869	0.136	0.277	0.0103298	PIK3R1	62526	distal
chr12-110079305-110080350	9.27139e-08	-0.365756	0.11	0.24	0.00957559	C12orf76	20197	distal
chr17-49249158-49250036	3.83168e-10	-0.365703	0.195	0.391	3.9574e-05	PHOSPHO1	7796	distal
chr18-23832889-23833327	1.02395e-09	-0.365675	0.045	0.16	0.000105755	LAMA3	16031	distal
chr9-121819149-121820376	3.24952e-08	-0.36553	0.206	0.379	0.00335613	DAB2IP	62873	distal
chr20-53175345-53175893	1.43849e-07	-0.365409	0.113	0.245	0.0148569	TSHZ2	26521	distal
chr6-108578545-108578992	2.07831e-08	-0.364704	0.048	0.153	0.0021465	FOXO3	41799	distal
chr12-2063844-2064628	4.624e-08	-0.36465	0.028	0.114	0.00477571	CACNA1C	32969	distal
chr7-139915749-139917062	9.73563e-09	-0.364571	0.3	0.495	0.00100551	TBXAS1	64871	distal
chr1-198162140-198162872	4.46489e-07	-0.364433	0.035	0.117	0.0461139	NEK7	56437	distal
chr5-81591025-81591297	1.36968e-09	-0.364416	0.032	0.133	0.000141462	SSBP2	40104	distal
chr5-80238827-80239456	1.39775e-10	-0.364119	0.035	0.148	1.44361e-05	SERINC5	40697	distal
chr10-7252124-7252439	2.60434e-08	-0.36405	0.023	0.107	0.00268979	SFMBT2	39738	distal
chr1-231934704-231935230	2.18718e-07	-0.363855	0.11	0.24	0.0225894	DISC1	27322	distal
chr1-164602322-164603071	2.21182e-08	-0.363745	0.033	0.126	0.00228439	PBX1	10221	distal
chr15-58628441-58629046	7.90702e-11	-0.363529	0.018	0.117	8.16645e-06	ADAM10	35529	distal
chr10-28839597-28839986	4.73409e-08	-0.362971	0.052	0.155	0.00488942	BAMBI	40361	distal
chr2-172094676-172099481	1.02177e-07	-0.362474	0.261	0.434	0.0105529	DLX2	50797	distal
chr2-126644661-126645657	2.30362e-08	-0.362397	0.128	0.277	0.00237921	GYPC	323	distal
chr3-195147362-195151280	4.24159e-07	-0.362114	0.288	0.447	0.0438076	XXYLT1	11163	distal
chr3-39387460-39389152	1.6747e-07	-0.361768	0.246	0.417	0.0172965	SLC25A38	49063	distal
chr11-118283768-118284255	3.52462e-07	-0.361649	0.072	0.177	0.0364026	MPZL2	8422	distal
chr9-694781-695649	2.32845e-07	-0.361544	0.053	0.15	0.0240485	KANK1	1429	distal
chr6-64160404-64160962	1.10173e-08	-0.361336	0.08	0.206	0.00113788	EYS	27322	distal
chr10-22251107-22253980	7.99056e-08	-0.360954	0.323	0.502	0.00825274	EBLN1	16489	distal
chr2-17593721-17594177	4.83841e-07	-0.359889	0.065	0.165	0.0499716	VSNL1	57128	distal
chr12-10701209-10702119	6.72872e-08	-0.359467	0.053	0.155	0.00694949	YBX3	44457	distal
chr3-194745778-194746117	2.18051e-10	-0.358505	0.02	0.117	2.25206e-05	FAM43A	58964	distal
chr7-101733666-101734276	4.04911e-08	-0.358257	0.035	0.126	0.00418196	CUX1	24812	distal
chr10-5959862-5960685	1.65202e-08	-0.357983	0.088	0.218	0.00170623	IL15RA	40932	distal
chr10-25076476-25077192	3.97842e-07	-0.357641	0.123	0.25	0.0410895	ENKUR	4416	distal
chr7-142838375-142839193	1.56622e-07	-0.357334	0.24	0.403	0.0161761	EPHB6	5823	distal
chr3-179375022-179375487	2.89055e-07	-0.357288	0.088	0.204	0.0298539	MFN1	47149	distal
chr21-38759798-38760392	9.7735e-11	-0.356958	0.053	0.182	1.00942e-05	ETS2	17504	distal
chr15-45278799-45279986	2.32293e-10	-0.356905	0.344	0.573	2.39915e-05	SLC28A2	47316	distal
chr5-111563138-111563878	1.06497e-07	-0.356848	0.103	0.233	0.0109991	STARD4	18928	distal
chr14-89493931-89494481	4.31758e-07	-0.356826	0.121	0.248	0.0445924	FOXN3	24106	distal
chr2-231611103-231615675	7.02611e-08	-0.356516	0.584	0.728	0.00725664	TEX44	42253	distal
chr19-21590950-21591208	3.38634e-11	-0.356433	0.015	0.112	3.49745e-06	ZNF429	64629	distal
chr6-17701687-17702295	2.46125e-07	-0.356113	0.052	0.148	0.0254201	NUP153	53356	distal
chr16-30805010-30806587	2.86911e-07	-0.356074	0.111	0.238	0.0296324	ZNF629	7364	distal
chr16-53098434-53100304	3.34123e-07	-0.355943	0.329	0.5	0.0345086	CHD9	13210	distal
chr5-145812280-145812581	1.2054e-07	-0.355877	0.027	0.107	0.0124495	PRELID2	45261	distal
chr8-85383102-85383653	1.71519e-08	-0.355546	0.077	0.201	0.00177147	CA1	16440	distal
chr18-70234598-70235213	2.75425e-10	-0.355404	0.06	0.189	2.84462e-05	RTTN	12511	distal
chr4-25050614-25051208	1.61449e-07	-0.354764	0.09	0.209	0.0166746	LGI2	8763	distal
chr13-112700870-112701488	2.25644e-11	-0.354498	0.043	0.172	2.33047e-06	ATP11A	33379	distal
chr2-25222403-25223202	3.84e-07	-0.353805	0.105	0.226	0.0396599	DNMT3A	48568	distal
chr7-5450418-5453422	1.59399e-07	-0.353296	0.183	0.333	0.0164629	TNRC18	11102	distal
chr20-48821462-48822119	7.4645e-09	-0.352785	0.092	0.228	0.000770941	PREX1	58560	distal
chrX-3882545-3882902	4.94236e-11	-0.352622	0.028	0.138	5.10451e-06	PRKX	6671	distal
chr3-195014905-195015422	1.06353e-08	-0.352469	0.053	0.165	0.00109843	XXYLT1	33583	distal
chr5-56585427-56586372	3.17061e-10	-0.351694	0.018	0.112	3.27464e-05	C5orf67	43663	distal
chr2-85392441-85392891	2.74719e-07	-0.351018	0.045	0.136	0.0283733	CAPG	41590	distal
chr17-17417968-17418742	2.30692e-08	-0.350781	0.057	0.167	0.00238261	MED9	20647	distal
chr14-77031758-77034543	3.89949e-08	-0.350401	0.316	0.505	0.00402744	IRF2BPL	13206	distal
chr4-122117693-122118743	4.76951e-09	-0.35009	0.16	0.328	0.0004926	KIAA1109	14191	distal
chr14-32200420-32204395	3.78354e-07	-0.349999	0.448	0.621	0.0390768	ARHGAP5	35893	distal
chr21-41932054-41934151	4.58424e-09	-0.349967	0.399	0.6	0.000473465	C2CD2	19643	distal
chr8-29272743-29273307	5.29307e-08	-0.349639	0.08	0.199	0.00546674	KIF13B	26858	distal
chr12-1907487-1908043	4.67355e-08	-0.349541	0.038	0.133	0.00482689	CACNA2D4	61935	distal
chr4-183876043-183876800	2.34299e-07	-0.349315	0.052	0.148	0.0241986	STOX2	12471	distal
chr17-44288212-44288942	2.18368e-07	-0.349107	0.171	0.323	0.0225532	RUNDC3A	8679	distal
chr10-42644944-42645633	2.31255e-07	-0.348704	0.16	0.308	0.0238842	ZNF33B	21847	distal
chr10-26377169-26377782	7.84483e-08	-0.347744	0.12	0.257	0.00810222	APBB1IP	21118	distal
chr22-17786331-17787144	1.14296e-08	-0.347728	0.135	0.291	0.00118046	BID	1904	distal
chr22-37193848-37194251	1.33114e-07	-0.347639	0.027	0.107	0.0137481	C1QTNF6	20063	distal
chr4-83019804-83020808	5.02372e-08	-0.347389	0.15	0.301	0.00518855	LIN54	22721	distal
chr2-205024859-205025627	8.60876e-09	-0.347367	0.185	0.362	0.000889121	PARD3B	59087	distal
chr2-127398089-127398700	1.29831e-07	-0.346673	0.058	0.163	0.0134091	MAP3K2	26819	distal
chr22-39452004-39453216	3.27771e-07	-0.345844	0.103	0.223	0.0338525	MGAT3	16547	distal
chr2-126673755-126674818	1.26292e-08	-0.345552	0.271	0.473	0.00130436	GYPC	41682	distal
chr1-66413106-66413634	4.20518e-07	-0.345535	0.08	0.189	0.0434315	PDE4B	58835	distal
chr20-6093914-6094490	6.64865e-08	-0.344789	0.032	0.119	0.0068668	FERMT1	48273	distal
chr7-140060675-140061305	3.66299e-07	-0.344678	0.067	0.17	0.0378318	PARP12	46050	distal
chr7-157177478-157178076	1.21962e-07	-0.343866	0.111	0.245	0.0125963	UBE3C	52395	distal
chr3-116038433-116040030	3.36405e-08	-0.343504	0.121	0.265	0.00347442	LSAMP	55260	distal
chr6-26175388-26176186	1.17507e-08	-0.343325	0.05	0.158	0.00121363	HIST1H2BE	50408	distal
chr15-49859926-49860358	7.81574e-11	-0.342851	0.042	0.165	8.07218e-06	ATP8B4	27322	distal
chr4-88297914-88298711	5.62392e-09	-0.342705	0.231	0.43	0.000580844	PPM1K	3438	distal
chr19-9060578-9061247	6.19323e-08	-0.342661	0.131	0.274	0.00639643	OR1M1	11420	distal
chr7-70838447-70838907	2.96916e-07	-0.342588	0.053	0.15	0.0306657	AUTS2	37951	distal
chr4-26613298-26613572	6.80604e-08	-0.342177	0.023	0.102	0.00702934	TBC1D19	48566	distal
chr2-230053948-230054600	3.32389e-08	-0.342084	0.04	0.136	0.00343294	SLC16A14	38445	distal
chr16-14284916-14287004	3.87958e-08	-0.3419	0.371	0.573	0.00400687	MKL2	64503	distal
chr16-53093777-53094805	1.72936e-07	-0.341834	0.097	0.223	0.017861	CHD9	15008	distal
chr10-58826687-58827075	2.21346e-07	-0.34175	0.05	0.146	0.0228608	BICC1	50344	distal
chr6-147161919-147162386	4.32697e-08	-0.341732	0.07	0.187	0.00446894	STXBP5	16766	distal
chr6-108606163-108606730	6.64547e-08	-0.341635	0.052	0.155	0.0068635	FOXO3	54863	distal
chr11-33936708-33937765	1.62901e-08	-0.341352	0.08	0.209	0.00168246	LMO2	17404	distal
chr10-3809334-3811878	9.18169e-09	-0.340722	0.206	0.396	0.000948294	KLF6	10726	distal
chr5-32759834-32760489	1.10889e-07	-0.340116	0.032	0.117	0.0114527	NPR3	55775	distal
chr2-224546130-224546585	2.68768e-07	-0.339959	0.058	0.158	0.0277586	CUL3	40845	distal
chr6-20291639-20292117	1.10262e-07	-0.339679	0.038	0.129	0.011388	MBOAT1	24456	distal
chr8-86511804-86512624	2.57368e-08	-0.339476	0.055	0.163	0.00265813	RMDN1	41240	distal
chr10-80648317-80648539	1.06648e-07	-0.339188	0.032	0.117	0.0110147	SH2D4B	33681	distal
chr5-134240401-134241104	4.64473e-08	-0.338837	0.047	0.148	0.00479712	PPP2CA	4473	distal
chr8-39004598-39004937	9.43609e-09	-0.33872	0.033	0.129	0.000974569	ADAM9	62828	distal
chr8-85916413-85916829	2.37023e-08	-0.338216	0.048	0.153	0.002448	PSKH2	39383	distal
chr12-93740729-93743131	1.46693e-09	-0.338187	0.23	0.425	0.000151506	CRADD	59879	distal
chr2-177286054-177286316	6.13405e-11	-0.338033	0.015	0.109	6.33531e-06	NFE2L2	9364	distal
chr3-188605945-188606170	1.39654e-08	-0.337924	0.035	0.131	0.00144236	LPP	27322	distal
chr15-64507122-64507930	4.81652e-07	-0.337902	0.123	0.252	0.0497455	ZNF609	63262	distal
chr13-49786405-49786846	4.74793e-08	-0.337807	0.06	0.167	0.00490371	KPNA3	59348	distal
chr3-152200774-152201487	4.05498e-07	-0.337601	0.05	0.143	0.0418802	MBNL1	22320	distal
chr18-12997197-12997743	3.15601e-07	-0.33734	0.062	0.163	0.0325955	CEP192	58745	distal
chr1-223771841-223772569	1.60224e-07	-0.337273	0.126	0.26	0.0165481	CAPN2	59031	distal
chr6-28104356-28105703	3.83505e-07	-0.337065	0.201	0.362	0.0396088	ZSCAN16	8130	distal
chr16-78577638-78578039	7.65673e-08	-0.336742	0.053	0.155	0.00790795	WWOX	39372	distal
chr16-53086100-53086369	2.96446e-07	-0.336685	0.038	0.124	0.0306172	CHD9	49436	distal
chr4-67713466-67714572	1.81626e-07	-0.336402	0.05	0.146	0.0187585	UBA6	2588	distal
chr4-8191065-8192047	9.73431e-10	-0.33561	0.181	0.376	0.000100537	SH3TC1	23488	distal
chr9-624875-625967	1.30907e-08	-0.335324	0.101	0.24	0.00135202	KANK1	24696	distal
chr2-126627678-126627980	2.47766e-08	-0.334955	0.023	0.107	0.00255895	GYPC	12241	distal
chr1-40633515-40634527	1.46345e-08	-0.334763	0.201	0.376	0.00151147	RIMS3	49367	distal
chr5-36237746-36238340	1.81403e-07	-0.333203	0.093	0.214	0.0187354	NADK2	49166	distal
chr2-42946383-42947290	1.27261e-07	-0.332418	0.07	0.182	0.0131437	HAAO	5432	distal
chr11-95715633-95716505	3.15756e-12	-0.332188	0.017	0.124	3.26116e-07	FAM76B	62195	distal
chr12-50550306-50550939	1.52734e-07	-0.33191	0.15	0.294	0.0157745	DIP2B	54826	distal
chr20-34085607-34086099	9.75538e-08	-0.331676	0.045	0.141	0.0100755	EIF2S2	47132	distal
chr16-10971481-10972824	2.43855e-07	-0.330891	0.115	0.245	0.0251855	CLEC16A	47477	distal
chr12-80186553-80188218	4.56121e-07	-0.3305	0.062	0.16	0.0471087	OTOGL	9500	distal
chr1-117128617-117129063	4.92614e-09	-0.3301	0.03	0.124	0.000508776	TRIM45	21091	distal
chr7-134359740-134360208	3.59603e-07	-0.330087	0.057	0.155	0.0371402	SLC35B4	16952	distal
chr14-24246770-24247259	4.74597e-08	-0.329202	0.023	0.104	0.00490169	TINF2	16460	distal
chr22-25148238-25148723	4.72667e-08	-0.3292	0.033	0.124	0.00488175	KIAA1671	51677	distal
chr9-126396764-126397602	1.498e-08	-0.329197	0.09	0.226	0.00154715	MVB12B	61516	distal
chr12-24695857-24696417	3.60255e-07	-0.329077	0.113	0.238	0.0372075	SOX5	3655	distal
chr6-53531568-53532892	2.7877e-07	-0.328627	0.213	0.371	0.0287916	GCLC	35107	distal
chr14-92568541-92569499	4.73738e-07	-0.32855	0.165	0.308	0.0489281	RIN3	57757	distal
chr10-5071599-5072164	3.73314e-08	-0.328509	0.065	0.177	0.00385563	AKR1C3	19889	distal
chr14-100223656-100224597	2.27585e-07	-0.328367	0.043	0.133	0.0235052	YY1	4587	distal
chr6-73704951-73705109	8.93089e-10	-0.327887	0.017	0.104	9.22391e-05	CD109	65264	distal
chr15-51185173-51185658	3.0545e-08	-0.327844	0.062	0.172	0.00315472	CYP19A1	50233	distal
chr6-125953009-125953813	3.25481e-07	-0.327309	0.028	0.107	0.033616	HINT3	12891	distal
chr8-49110148-49110895	1.0427e-07	-0.327099	0.16	0.308	0.0107691	C8orf22	52201	distal
chr1-61170597-61170986	9.42597e-08	-0.326914	0.037	0.126	0.00973524	NFIA	65130	distal
chr6-4274438-4274718	1.37848e-07	-0.32665	0.027	0.107	0.014237	ECI2	4135	distal
chr16-12387321-12387683	1.57594e-07	-0.326156	0.033	0.119	0.0162764	SNX29	27322	distal
chr6-26295760-26297239	2.36427e-07	-0.325818	0.038	0.126	0.0244184	HIST1H4H	268	distal
chr15-68984106-68984507	2.24449e-09	-0.324733	0.028	0.126	0.000231813	NOX5	13066	distal
chr16-58409229-58409894	2.38327e-07	-0.32462	0.12	0.252	0.0246146	GINS3	40964	distal
chr2-104658153-104659668	5.14211e-08	-0.323909	0.143	0.296	0.00531082	POU3F3	8653	distal
chr3-193656335-193656931	2.45306e-07	-0.323898	0.083	0.197	0.0253354	OPA1	59887	distal
chr2-75374377-75374754	2.57586e-07	-0.323824	0.032	0.114	0.0266037	EVA1A	38353	distal
chr5-99076423-99077362	2.34508e-08	-0.323477	0.131	0.282	0.00242202	CHD1	4892	distal
chr18-55748276-55748788	3.56894e-07	-0.322993	0.052	0.146	0.0368604	TCF4	1416	distal
chr13-39401047-39402237	3.17438e-07	-0.322957	0.236	0.403	0.0327853	LHFP	27322	distal
chr21-34706050-34707124	7.37459e-08	-0.322892	0.273	0.466	0.00761655	CLIC6	51775	distal
chr6-143034774-143035401	1.915e-08	-0.322817	0.133	0.289	0.00197783	AIG1	11278	distal
chr4-151745840-151746289	5.58663e-08	-0.322738	0.065	0.177	0.00576992	GATB	38759	distal
chr15-91892530-91892774	2.02683e-07	-0.322124	0.04	0.129	0.0209333	SLCO3A1	52537	distal
chr16-85072954-85073590	1.88935e-07	-0.319607	0.068	0.177	0.0195133	KIAA0513	59420	distal
chr9-15295740-15296614	6.24255e-08	-0.319505	0.03	0.117	0.00644737	TTC39B	33675	distal
chr7-105948096-105948370	1.6404e-07	-0.319255	0.028	0.109	0.0169422	CDHR3	4996	distal
chr13-44382426-44383431	7.92464e-10	-0.319201	0.213	0.413	8.18464e-05	SERP2	64753	distal
chr5-134465502-134467215	3.20139e-08	-0.318958	0.324	0.517	0.00330643	CDKN2AIPNL	19634	distal
chr14-65229539-65230512	2.40132e-07	-0.318896	0.042	0.131	0.0248011	MAX	2984	distal
chr8-23493861-23494662	4.43709e-08	-0.318604	0.205	0.381	0.00458267	SLC25A37	14377	distal
chr2-108351850-108352266	3.53043e-08	-0.318369	0.043	0.143	0.00364627	SULT1C4	11395	distal
chr3-187025085-187026524	3.36722e-07	-0.318364	0.181	0.335	0.034777	ST6GAL1	49971	distal
chr22-24091644-24092295	2.60867e-07	-0.317701	0.095	0.216	0.0269426	CABIN1	21755	distal
chr2-226684019-226684332	1.86497e-07	-0.317665	0.025	0.102	0.0192616	IRS1	34814	distal
chr20-53912119-53912820	6.54839e-08	-0.316359	0.155	0.311	0.00676324	BCAS1	39895	distal
chr18-26510312-26510679	1.95271e-07	-0.316252	0.047	0.141	0.0201677	KCTD1	52254	distal
chr4-83342397-83342921	2.37352e-07	-0.315868	0.027	0.104	0.024514	HPSE	23370	distal
chr17-8062369-8063262	1.10775e-07	-0.315601	0.088	0.209	0.011441	ALOX15B	45537	distal
chr2-26298266-26300266	2.45675e-07	-0.315246	0.128	0.265	0.0253736	ADGRF3	42755	distal
chr1-115793122-115793620	8.0886e-08	-0.315238	0.053	0.155	0.00835399	CASQ2	10844	distal
chr7-121438134-121438943	3.63174e-08	-0.315179	0.11	0.248	0.0037509	FAM3C	16687	distal
chr18-13512102-13513485	5.27051e-10	-0.314671	0.042	0.158	5.44343e-05	LDLRAD4	27064	distal
chr5-173855509-173856048	2.07064e-07	-0.314371	0.082	0.197	0.0213858	CPEB4	13753	distal
chr20-62025289-62026480	4.35065e-08	-0.313322	0.037	0.131	0.0044934	TAF4	52785	distal
chr8-103077706-103079410	6.97481e-09	-0.31323	0.198	0.381	0.000720366	ATP6V1C1	58292	distal
chr11-63829828-63830316	5.39946e-09	-0.312984	0.022	0.109	0.000557661	MARK2	25473	distal
chr10-72254594-72255666	3.21322e-08	-0.312545	0.082	0.209	0.00331865	DDIT4	7694	distal
chr6-17664197-17664875	4.62405e-07	-0.31243	0.055	0.15	0.0477576	NUP153	53585	distal
chr4-38958286-38959341	1.94549e-07	-0.311291	0.303	0.49	0.0200933	TMEM156	62199	distal
chr22-46068848-46072937	3.09316e-07	-0.311193	0.456	0.629	0.0319465	PRR34	4854	distal
chr12-56590201-56590660	3.44239e-07	-0.310982	0.03	0.109	0.0355534	RBMS2	47903	distal
chr19-10839242-10839534	6.27393e-10	-0.310851	0.018	0.109	6.47978e-05	C19orf38	47359	distal
chr1-32133292-32133982	5.08819e-08	-0.310204	0.145	0.296	0.00525514	KPNA6	46633	distal
chr6-152171071-152171398	2.71445e-07	-0.310188	0.043	0.133	0.0280351	SYNE1	11917	distal
chr22-20867287-20868059	4.58051e-08	-0.310094	0.103	0.238	0.0047308	SNAP29	64190	distal
chr1-112998865-112999268	3.36724e-07	-0.309047	0.03	0.109	0.0347772	SLC16A1	16904	distal
chr2-127874615-127875340	1.77355e-07	-0.306637	0.045	0.138	0.0183174	AMMECR1L	66456	distal
chr8-17348686-17349019	1.87735e-09	-0.306042	0.028	0.126	0.000193895	MTMR7	60196	distal
chr12-32390482-32391350	3.03053e-07	-0.305723	0.05	0.146	0.0312997	FGD4	24839	distal
chr4-128471513-128472117	1.26859e-07	-0.305505	0.121	0.26	0.0131021	PGRMC2	7702	distal
chr3-196127045-196128088	4.37565e-07	-0.304026	0.18	0.33	0.0451922	TFRC	17492	distal
chr3-87795356-87797301	3.21123e-08	-0.30378	0.195	0.364	0.00331659	HTR1F	8489	distal
chr16-1820443-1821135	4.27109e-08	-0.30362	0.145	0.303	0.00441123	HAGH	58396	distal
chr17-39683352-39683947	3.94245e-08	-0.303312	0.085	0.214	0.0040718	PGAP3	60834	distal
chr6-79599891-79600263	4.23449e-07	-0.303159	0.048	0.141	0.0437342	SH3BGRL2	13340	distal
chr10-104260620-104261097	2.31917e-08	-0.303147	0.042	0.141	0.00239526	GSTO1	58875	distal
chr1-29156750-29157375	1.36366e-07	-0.302827	0.078	0.194	0.014084	SRSF4	46308	distal
chr16-21300357-21302290	2.20222e-07	-0.30265	0.318	0.495	0.0227447	CRYM	62821	distal
chr16-20673763-20676730	3.73026e-07	-0.302044	0.308	0.473	0.0385265	ACSM1	38586	distal
chr5-27009594-27009851	3.68928e-09	-0.301685	0.037	0.138	0.000381032	CDH9	48377	distal
chr7-55970670-55971694	2.38046e-07	-0.300509	0.236	0.415	0.0245856	GBAS	59387	distal
chr6-12119105-12119517	1.24599e-08	-0.299937	0.027	0.117	0.00128688	HIVEP1	33075	distal
chr9-116464819-116467237	1.01804e-07	-0.298953	0.376	0.575	0.0105144	ASTN2	27322	distal
chr3-12952964-12953666	4.11623e-07	-0.297965	0.105	0.228	0.0425129	IQSEC1	37970	distal
chr2-148614073-148615105	1.62198e-08	-0.297846	0.067	0.184	0.00167519	EPC2	12964	distal
chr18-74242490-74242957	1.52293e-07	-0.297173	0.052	0.15	0.015729	CYB5A	55762	distal
chr6-6686860-6687458	2.93784e-07	-0.2968	0.043	0.133	0.0303423	LY86	66923	distal
chr5-180781886-180782230	1.79406e-07	-0.296127	0.035	0.121	0.0185292	MGAT1	44150	distal
chr8-140693426-140694076	3.09362e-07	-0.295527	0.12	0.248	0.0319512	PTK2	10328	distal
chr13-113365839-113366286	2.75605e-07	-0.295048	0.027	0.104	0.0284647	GRTP1	6699	distal
chr8-121514780-121515184	2.49316e-08	-0.2949	0.023	0.107	0.00257496	HAS2	36283	distal
chr1-69539870-69540598	1.42786e-07	-0.294653	0.18	0.345	0.014747	LRRC7	12183	distal
chr19-15976992-15977714	2.2291e-08	-0.294454	0.08	0.206	0.00230223	OR10H4	48007	distal
chr12-93177726-93178140	2.31107e-07	-0.294334	0.055	0.153	0.023869	NUDT4	8922	distal
chr12-12958823-12959275	2.57567e-08	-0.294169	0.057	0.167	0.00266018	GPRC5D	25230	distal
chr3-49397345-49397884	9.83469e-08	-0.29404	0.072	0.184	0.0101574	RHOA	38021	distal
chr3-15051445-15053384	2.96079e-08	-0.29335	0.298	0.502	0.00305793	MRPS25	35270	distal
chr6-30496011-30497223	2.23472e-07	-0.293222	0.158	0.301	0.0230804	HLA-E	60479	distal
chr12-42385451-42385707	1.9436e-07	-0.29208	0.025	0.102	0.0200737	PPHLN1	58972	distal
chr6-129507953-129508216	3.86173e-08	-0.29206	0.027	0.112	0.00398843	LAMA2	27322	distal
chr16-1812597-1813162	3.05261e-07	-0.291968	0.065	0.17	0.0315277	HAGH	37566	distal
chr5-100424055-100424384	4.33568e-09	-0.290994	0.042	0.148	0.000447794	FAM174A	1268	distal
chr2-6893754-6894280	2.88142e-08	-0.289997	0.08	0.204	0.00297596	RSAD2	40217	distal
chr3-108598403-108598732	9.83576e-08	-0.289107	0.032	0.117	0.0101585	DZIP3	16519	distal
chr3-45983761-45984187	5.72672e-08	-0.288829	0.057	0.163	0.00591461	FYCO1	34931	distal
chr19-1632820-1633370	1.76317e-07	-0.288216	0.043	0.136	0.0182102	TCF3	41032	distal
chr10-59729215-59729604	5.0904e-08	-0.287198	0.027	0.112	0.00525742	SLC16A9	60116	distal
chr8-22900847-22901170	5.15117e-08	-0.286999	0.028	0.114	0.00532018	PEBP4	47381	distal
chr16-28187516-28188784	4.50011e-07	-0.286645	0.035	0.117	0.0464776	XPO6	45290	distal
chr13-27242747-27243048	4.04117e-08	-0.283727	0.028	0.114	0.00417376	RPL21	24969	distal
chr12-108783365-108783713	4.08572e-07	-0.283352	0.032	0.112	0.0421977	SSH1	54389	distal
chr7-50062923-50063388	1.10481e-07	-0.28323	0.078	0.197	0.0114105	ZPBP	48877	distal
chr7-100269543-100269932	8.7641e-08	-0.283198	0.027	0.109	0.00905165	GATS	45188	distal
chr17-48455872-48456148	2.46586e-07	-0.283015	0.032	0.114	0.0254676	SKAP1	11358	distal
chr18-13309300-13310781	2.58299e-08	-0.280428	0.374	0.583	0.00266774	LDLRAD4	49491	distal
chr14-89440948-89441363	1.86583e-07	-0.279269	0.052	0.15	0.0192705	FOXN3	10630	distal
chr12-123022192-123022605	2.68106e-07	-0.278337	0.043	0.133	0.0276903	PITPNM2	35523	distal
chr8-17349710-17350274	9.36641e-11	-0.277594	0.055	0.189	9.67372e-06	MTMR7	59890	distal
chr11-6746225-6747503	3.34004e-07	-0.277563	0.042	0.131	0.0344962	OR2AG2	44655	distal
chr12-94954177-94954621	1.39496e-07	-0.277071	0.03	0.114	0.0144073	NDUFA12	56071	distal
chr6-125954874-125955348	3.27109e-07	-0.276898	0.052	0.148	0.0337841	HINT3	4527	distal
chr15-85759247-85759924	4.64817e-07	-0.276796	0.072	0.18	0.0480067	KLHL25	51190	distal
chr1-207428177-207428601	7.61638e-08	-0.276694	0.047	0.146	0.00786627	CR2	11348	distal
chr12-630236-631111	8.00144e-08	-0.275668	0.072	0.187	0.00826396	NINJ2	36151	distal
chr8-140348913-140349812	2.59624e-08	-0.272893	0.023	0.107	0.00268142	TRAPPC9	33749	distal
chr10-5915372-5916007	4.16455e-08	-0.271979	0.141	0.294	0.00430119	FBXO18	44345	distal
chr16-78742514-78743417	1.13244e-07	-0.271056	0.082	0.201	0.011696	WWOX	27322	distal
chr6-126112069-126112682	2.10327e-08	-0.270127	0.058	0.17	0.00217228	TRMT11	36204	distal
chr9-115396241-115396576	4.29342e-07	-0.26982	0.047	0.138	0.0443428	2021-12-01	15506	distal
chr6-47420401-47421020	1.70443e-07	-0.269005	0.092	0.214	0.0176036	CD2AP	20318	distal
chr7-136033405-136033831	3.14763e-09	-0.265344	0.058	0.18	0.00032509	MTPN	20162	distal
chr7-129438690-129439394	4.00694e-07	-0.264768	0.125	0.26	0.0413841	STRIP2	53890	distal
chr17-55480741-55481225	3.00984e-08	-0.262584	0.063	0.177	0.00310859	RP11-515E23.1	49029	distal
chr20-19735028-19735953	6.62702e-08	-0.262363	0.185	0.352	0.00684445	RIN2	5151	distal
chr7-8229942-8230260	3.54967e-08	-0.26042	0.035	0.129	0.00366614	ICA1	58308	distal
chr3-13404734-13405139	1.38527e-07	-0.259094	0.037	0.126	0.0143072	NUP210	39254	distal
chr12-979273-979761	4.17471e-07	-0.258551	0.082	0.194	0.0431168	RAD52	32981	distal
chr15-40623368-40623764	2.25134e-07	-0.258459	0.045	0.138	0.0232521	CASC5	48575	distal
chr5-153893733-153894252	1.3224e-08	-0.258129	0.088	0.223	0.00136578	FAM114A2	38523	distal
chr16-29720614-29722030	3.52601e-07	-0.257931	0.148	0.296	0.036417	C16orf54	45956	distal
chr13-39348110-39348662	1.56921e-07	-0.256386	0.062	0.167	0.0162069	LHFP	27322	distal
chr9-124657714-124660877	7.77573e-08	-0.255384	0.461	0.655	0.00803085	NR6A1	34089	distal
chr11-74437422-74437750	5.43727e-09	-0.255245	0.035	0.136	0.000561567	KCNE3	46311	distal
chr8-38982485-38982852	7.604e-09	-0.250981	0.027	0.119	0.000785349	HTRA4	64227	distal
chr13-25014375-25014852	3.32157e-07	-0.250324	0.067	0.172	0.0343055	PABPC3	24710	distal
chr13-50122336-50127945	3.37469e-07	-0.25013	0.682	0.806	0.0348542	KCNRG	33623	distal
chr3-4225047-4225436	1.86368e-07	-0.24929	0.037	0.124	0.0192482	SETMAR	24251	distal
chr10-96677490-96677822	3.04634e-07	-0.247582	0.027	0.104	0.0314629	PIK3AP1	24395	distal
chr8-66112500-66114931	3.23263e-07	-0.246524	0.446	0.629	0.0333869	TRIM55	2219	distal
chr7-4549690-4550003	6.24378e-08	-0.24424	0.025	0.107	0.00644864	FOXK1	3525	distal
chr8-69994520-69995010	2.42413e-08	-0.243961	0.023	0.107	0.00250367	PRDM14	62868	distal
chr3-114079821-114080148	4.53028e-07	-0.238849	0.04	0.126	0.0467892	QTRT2	45446	distal
chr20-15144887-15145406	1.68646e-07	-0.235586	0.033	0.119	0.0174179	MACROD2	19141	distal
chr5-41754805-41755303	2.46003e-07	-0.235542	0.035	0.121	0.0254075	OXCT1	52692	distal
chr9-92328200-92328637	1.08243e-07	-0.233888	0.023	0.102	0.0111795	CENPP	44895	distal
chr5-129082251-129082677	3.74376e-07	-0.233564	0.042	0.131	0.038666	ISOC1	2342	distal
chr8-41012264-41012755	4.81156e-07	-0.230014	0.072	0.177	0.0496943	ZMAT4	1661	distal
chr1-246338178-246338435	4.19767e-08	-0.227714	0.027	0.112	0.0043354	SMYD3	63392	distal
chr7-134669631-134670442	2.85962e-07	-0.221036	0.037	0.124	0.0295345	BPGM	45310	distal
chr8-97870806-97871413	1.78164e-07	-0.218181	0.087	0.209	0.0184009	MATN2	40663	distal
chr3-179027520-179027937	2.43032e-08	-0.213445	0.032	0.124	0.00251006	ZMAT3	54531	distal
chr1-15674418-15675132	1.1408e-09	-0.196986	0.027	0.126	0.000117822	PLEKHM2	26243	distal
chr3-69326683-69327579	1.47838e-07	-0.193724	0.067	0.177	0.0152689	FRMD4B	58778	distal

## Sheet: Table S5
Table S5. scRNA-seq cluster markers of MNCs from HD and and MDR-RS samples
p_val	avg_logFC	pct.1	pct.2	p_val_adj	cluster	gene
0	1.8325	0.979	0.619	0	0	IL7R
0	1.43232	0.996	0.663	0	0	LTB
0	1.18557	0.995	0.783	0	0	LDHB
0	0.9988	1	0.931	0	0	RPL10A
0	0.998101	0.918	0.516	0	0	CCR7
0	0.99214	0.997	0.732	0	0	VIM
0	0.940498	1	0.968	0	0	RPL3
0	0.873445	1	0.967	0	0	RPS18
0	0.853709	1	0.954	0	0	RPL5
0	0.85196	0.891	0.514	0	0	MAL
0	0.807682	1	0.972	0	0	RPS8
0	0.805579	1	0.942	0	0	RPS5
0	0.801451	1	0.952	0	0	RPL7
0	0.79679	1	0.977	0	0	RPS6
0	0.783762	1	0.939	0	0	EEF1B2
0	0.750928	0.892	0.595	0	0	TRBC1
0	0.7257	1	0.979	0	0	RPS2
0	0.700239	1	0.961	0	0	RPL7A
0	0.643417	0.999	0.927	0	0	RPL23
0	0.626732	1	0.962	0	0	RPL14
0	0.590762	0.985	0.82	0	0	HSPA8
0	0.575612	0.811	0.368	0	0	TSHZ2
0	0.571297	0.997	0.869	0	0	NPM1
0	0.547017	1	0.944	0	0	RPL4
0	0.517419	0.907	0.665	0	0	FKBP5
0	0.49109	1	0.959	0	0	RPL37A
0	0.459521	0.993	0.866	0	0	HNRNPA1
0	0.446244	0.926	0.654	0	0	PEBP1
0	0.432601	0.917	0.681	0	0	C1orf162
0	0.426546	0.921	0.657	0	0	LDHA
0	0.3695	0.765	0.448	0	0	ARMH1
0	0.290458	0.786	0.458	0	0	BEX3
0	0.235346	0.825	0.392	0	0	NEFL
0	0.202291	0.892	0.606	0	0	COL18A1
0	0.17866	0.776	0.483	0	0	LGALS3BP
0	0.154385	0.742	0.236	0	0	CMTM8
0	0.142763	0.814	0.355	0	0	TRAV17
6.97524e-304	0.167743	0.783	0.506	1.39505e-300	0	PVT1
1.25596e-296	0.280538	0.913	0.668	2.51193e-293	0	S100A11
5.62592e-295	0.403017	0.904	0.738	1.12518e-291	0	PPA1
7.7544e-294	0.167778	0.784	0.516	1.55088e-290	0	CASP6
9.15689e-287	0.383753	0.949	0.793	1.83138e-283	0	S100A10
1.38479e-286	0.386882	0.953	0.739	2.76959e-283	0	ENO1
1.35203e-281	0.179108	0.807	0.527	2.70405e-278	0	STAT5A
1.4166e-281	0.157954	0.817	0.583	2.83319e-278	0	HSBP1L1
1.14402e-274	0.158215	0.787	0.568	2.28805e-271	0	TTN
3.36465e-272	0.294892	0.794	0.644	6.7293e-269	0	RFLNB
5.60546e-268	0.303635	0.914	0.667	1.12109e-264	0	SAMHD1
7.6408e-267	0.266323	0.993	0.877	1.52816e-263	0	HSP90AB1
6.54587e-266	0.175113	0.848	0.529	1.30917e-262	0	SPINT2
4.67072e-257	0.40073	0.918	0.785	9.34143e-254	0	RSL1D1
2.04069e-246	0.268639	0.778	0.615	4.08138e-243	0	MYC
4.95521e-246	0.316432	0.868	0.655	9.91042e-243	0	PKM
6.72543e-246	0.241109	0.866	0.691	1.34509e-242	0	COTL1
3.94916e-242	0.376526	0.964	0.79	7.89832e-239	0	HMGN1
3.57456e-234	0.181927	0.814	0.605	7.14912e-231	0	DNPH1
7.49162e-221	0.232285	0.849	0.604	1.49832e-217	0	NHP2
4.45361e-214	0.21002	0.823	0.634	8.90721e-211	0	EBPL
6.93667e-206	0.281252	0.915	0.737	1.38733e-202	0	NDUFS5
4.37085e-205	0.184304	0.824	0.575	8.7417e-202	0	MRPS26
1.28723e-204	0.277055	0.966	0.751	2.57445e-201	0	S100A4
2.7081e-202	0.328425	1	0.911	5.41619e-199	0	PTMA
1.30153e-199	0.15753	0.868	0.692	2.60306e-196	0	ALOX5AP
3.41268e-197	0.291943	0.864	0.657	6.82537e-194	0	PGK1
1.95872e-185	0.194067	0.808	0.562	3.91744e-182	0	IFI6
6.23582e-183	0.125698	0.763	0.574	1.24716e-179	0	MRPL24
3.25113e-181	0.122833	0.78	0.637	6.50227e-178	0	NIPSNAP1
5.56899e-178	0.163913	0.772	0.626	1.1138e-174	0	DIMT1
2.37893e-175	0.123844	0.914	0.705	4.75785e-172	0	SERPINB1
2.9124e-174	0.27018	0.784	0.539	5.82481e-171	0	MIF
6.89885e-173	0.265178	1	0.951	1.37977e-169	0	RPLP0
2.23648e-167	0.26771	0.89	0.748	4.47297e-164	0	FBL
3.69084e-160	0.260331	0.96	0.83	7.38168e-157	0	HIST1H1D
1.1842e-155	0.269933	0.867	0.684	2.36841e-152	0	SELENOH
3.76269e-148	0.182942	0.884	0.702	7.52539e-145	0	LSM4
3.05783e-144	0.12517	0.762	0.582	6.11566e-141	0	CBR1
3.33353e-141	0.230391	0.778	0.621	6.66707e-138	0	ADI1
6.46243e-141	0.114653	0.779	0.585	1.29249e-137	0	MRPS23
6.53721e-141	0.133756	0.753	0.583	1.30744e-137	0	RRS1
1.7202e-136	0.179991	0.859	0.72	3.44039e-133	0	SNHG7
5.14505e-135	0.159944	0.851	0.667	1.02901e-131	0	ADH5
4.3825e-132	0.178517	0.862	0.703	8.76501e-129	0	C1QBP
2.03901e-129	0.219773	0.767	0.594	4.07802e-126	0	HSPB1
8.154e-127	0.195546	0.873	0.721	1.6308e-123	0	PDCD4
3.94203e-119	0.198554	0.849	0.699	7.88406e-116	0	APEX1
6.36828e-116	0.137378	0.734	0.532	1.27366e-112	0	KNOP1
7.51561e-115	0.161585	0.844	0.692	1.50312e-111	0	FKBP1A
1.9487e-114	0.182159	0.803	0.622	3.8974e-111	0	TOMM22
2.56e-113	0.152914	0.794	0.652	5.12e-110	0	DARS
4.84247e-107	0.188769	0.99	0.87	9.68494e-104	0	PPIA
3.32557e-105	0.11486	0.811	0.681	6.65114e-102	0	MRPL3
1.23036e-103	0.123127	0.918	0.764	2.46071e-100	0	ATP5MC3
8.75496e-102	0.15401	0.834	0.648	1.75099e-98	0	TAGLN2
1.40437e-101	0.123448	0.799	0.645	2.80874e-98	0	BMS1
8.60494e-97	0.107212	0.823	0.698	1.72099e-93	0	STIP1
2.01912e-95	0.117589	0.867	0.741	4.03824e-92	0	HSPE1
1.92854e-94	0.128403	0.878	0.7	3.85709e-91	0	LSM7
1.45572e-92	0.127502	0.819	0.675	2.91145e-89	0	ABCE1
1.72617e-90	0.136268	0.753	0.587	3.45235e-87	0	DMAC1
4.51266e-89	0.149436	0.833	0.738	9.02532e-86	0	PABPC4
6.54567e-88	0.119285	0.767	0.658	1.30913e-84	0	KCNQ1OT1
3.91914e-87	0.123071	0.868	0.721	7.83829e-84	0	NUCB2
4.12255e-87	0.120946	0.859	0.723	8.24509e-84	0	MRPS34
4.45016e-86	0.164211	0.726	0.613	8.90032e-83	0	TIMP1
2.37995e-83	0.167152	0.913	0.781	4.7599e-80	0	HNRNPM
7.56963e-83	0.117798	0.833	0.68	1.51393e-79	0	SIVA1
5.00058e-73	0.101523	0.777	0.714	1.00012e-69	0	TYW3
7.37402e-72	0.101619	0.846	0.73	1.4748e-68	0	CAPRIN1
3.08175e-70	0.103121	0.748	0.638	6.16349e-67	0	TIMM9
4.25536e-69	0.156336	0.76	0.648	8.51071e-66	0	DNAJC19
3.82126e-68	0.141519	0.77	0.648	7.64253e-65	0	NIFK
5.96086e-63	0.113499	0.74	0.625	1.19217e-59	0	MRPL11
1.03729e-62	0.118717	0.935	0.852	2.07458e-59	0	XRCC5
1.51077e-60	0.113888	0.906	0.809	3.02153e-57	0	ATP5F1A
2.9242e-60	0.1093	0.865	0.747	5.8484e-57	0	NDUFS6
2.1881e-59	0.122316	0.868	0.776	4.3762e-56	0	EIF3I
2.84251e-59	0.147851	0.782	0.677	5.68501e-56	0	DSTN
6.92112e-58	0.103534	0.77	0.656	1.38422e-54	0	UTP18
1.47314e-57	0.133422	0.693	0.604	2.94627e-54	0	MARCKSL1
8.53767e-54	0.11602	0.759	0.658	1.70753e-50	0	CLNS1A
6.87834e-53	0.111818	0.706	0.59	1.37567e-49	0	METTL26
1.5376e-52	0.116737	0.761	0.673	3.07519e-49	0	NOP58
8.38821e-47	0.110419	0.785	0.727	1.67764e-43	0	LSM5
4.47466e-44	0.117712	0.85	0.767	8.94932e-41	0	SNU13
9.03917e-43	0.10232	0.682	0.576	1.80783e-39	0	MX1
2.25674e-41	0.112524	0.734	0.691	4.51347e-38	0	MLLT3
2.75377e-34	0.130021	0.653	0.599	5.50755e-31	0	FAM162A
8.88752e-33	0.119729	0.687	0.601	1.7775e-29	0	MINOS1
1.77851e-24	0.117009	0.534	0.295	3.55701e-21	0	ID3
2.69549e-22	0.117682	0.581	0.514	5.39097e-19	0	ACTN1
3.96243e-13	0.123153	0.555	0.499	7.92485e-10	0	MT1X
0	1.92336	0.91	0.683	0	1	GDF15
0	1.46938	0.987	0.972	0	1	FTH1
0	1.43024	0.939	0.743	0	1	TRIM58
0	1.24149	0.885	0.655	0	1	GADD45A
0	1.10853	1	1	0	1	HBB
0	1.09864	0.857	0.584	0	1	AC130456.3
0	1.09417	0.861	0.708	0	1	ARL4A
0	1.01594	1	0.989	0	1	HBA2
0	0.99324	1	0.973	0	1	HBA1
0	0.98184	0.984	0.869	0	1	HBM
0	0.964794	0.851	0.703	0	1	TRIB3
0	0.915934	0.848	0.55	0	1	ARG2
0	0.911666	0.855	0.592	0	1	TMCC2
0	0.891128	0.959	0.82	0	1	BLVRB
0	0.860865	0.853	0.694	0	1	CREG1
0	0.859967	0.886	0.744	0	1	KLF1
0	0.859644	0.862	0.599	0	1	CTNNAL1
0	0.73016	0.855	0.643	0	1	SLC40A1
0	0.709004	0.814	0.673	0	1	FDXR
0	0.697674	0.797	0.603	0	1	PGF
0	0.546073	0.801	0.581	0	1	CMBL
0	0.403142	0.933	0.808	0	1	HBD
0	0.329945	0.79	0.541	0	1	ANKRD18B
0	0.190266	0.621	0.289	0	1	NECTIN4
0	0.130403	0.734	0.417	0	1	IFIT1B
0	0.122063	0.581	0.232	0	1	TMEM40
6.46381e-304	0.648361	0.844	0.648	1.29276e-300	1	LMNA
1.55604e-289	0.282187	0.749	0.565	3.11208e-286	1	SERPINE2
8.87572e-282	0.469061	0.717	0.53	1.77514e-278	1	PLEK2
5.16506e-262	0.399959	0.726	0.659	1.03301e-258	1	PCSK1N
1.12752e-238	0.545755	0.886	0.764	2.25505e-235	1	HMGA1
3.41555e-233	0.447114	0.796	0.664	6.8311e-230	1	SMIM5
4.63907e-214	0.453956	0.875	0.719	9.27815e-211	1	HMBS
8.81342e-212	0.137954	0.014	0.428	1.76268e-208	1	C1QA
6.01052e-211	0.461141	0.669	0.555	1.2021e-207	1	SELENOP
8.97596e-200	0.612593	0.866	0.733	1.79519e-196	1	TFRC
8.75821e-195	0.332735	0.666	0.506	1.75164e-191	1	KLC3
7.08769e-184	0.294237	0.756	0.632	1.41754e-180	1	ATF3
5.80468e-178	0.438468	0.693	0.519	1.16094e-174	1	IFI27
1.92959e-176	0.112021	0.644	0.464	3.85918e-173	1	SMIM24
3.58204e-169	0.244566	0.803	0.704	7.16407e-166	1	TSPO2
8.9319e-151	0.398202	0.923	0.86	1.78638e-147	1	SAT1
1.62563e-147	0.511843	0.804	0.651	3.25125e-144	1	DDIT3
7.64069e-145	0.349586	0.786	0.597	1.52814e-141	1	EPB42
2.63601e-144	0.430739	0.765	0.695	5.27203e-141	1	SMIM1
3.64001e-143	0.27436	0.701	0.661	7.28002e-140	1	HSPA1B
5.31813e-136	0.188421	0.608	0.371	1.06363e-132	1	ARG1
6.11651e-133	0.409592	0.672	0.631	1.2233e-129	1	RGS16
1.53126e-130	0.990935	0.934	0.868	3.06253e-127	1	HIST1H1C
9.14143e-119	0.282236	0.825	0.738	1.82829e-115	1	TMEM14C
2.07719e-112	0.27339	0.567	0.475	4.15439e-109	1	DEPP1
1.76988e-92	0.451841	0.774	0.69	3.53975e-89	1	ABHD5
4.15512e-88	0.301808	0.809	0.754	8.31024e-85	1	MIR4435-2HG
1.03257e-82	0.397734	0.788	0.705	2.06513e-79	1	REXO2
1.76247e-79	0.252097	0.626	0.484	3.52494e-76	1	BCAM
2.91824e-79	0.225589	0.603	0.496	5.83648e-76	1	PBX1
3.03665e-78	0.398617	0.715	0.74	6.07329e-75	1	GATA1
4.98891e-77	0.23404	0.703	0.624	9.97782e-74	1	MTURN
2.73404e-72	0.225064	0.715	0.653	5.46808e-69	1	ATF5
1.20462e-65	0.551585	0.548	0.449	2.40924e-62	1	PDZK1IP1
1.88352e-64	0.247138	0.582	0.429	3.76704e-61	1	CDH1
1.13247e-62	0.311359	0.631	0.519	2.26494e-59	1	CTSL
1.72178e-59	0.299227	0.744	0.67	3.44356e-56	1	ODC1
2.32966e-54	0.196078	0.715	0.755	4.65932e-51	1	MYL4
2.4968e-53	0.204047	0.682	0.618	4.99359e-50	1	RCL1
1.37076e-52	0.271531	0.971	0.954	2.74152e-49	1	RPLP0
1.41156e-52	0.475781	0.656	0.603	2.82312e-49	1	CDKN1A
2.01692e-43	0.303746	0.835	0.799	4.03385e-40	1	CYTOR
2.02796e-42	0.112864	0.668	0.591	4.05593e-39	1	MBOAT2
2.59889e-41	0.706887	0.738	0.857	5.19779e-38	1	HSPA5
9.36414e-41	0.224636	0.622	0.613	1.87283e-37	1	RAB13
8.3321e-40	0.101368	0.656	0.631	1.66642e-36	1	CDC42BPA
3.3306e-34	0.112626	0.583	0.519	6.66121e-31	1	FAM83D
8.71091e-33	0.144556	0.282	0.411	1.74218e-29	1	HBZ
4.62498e-32	0.100312	0.371	0.54	9.24995e-29	1	APOE
1.2751e-30	0.110216	0.59	0.51	2.55019e-27	1	CR1L
2.57001e-30	0.188014	0.498	0.724	5.14001e-27	1	HBG2
5.68516e-30	0.166768	0.692	0.708	1.13703e-26	1	MPST
8.17011e-28	0.141317	0.608	0.621	1.63402e-24	1	ACKR1
3.94179e-27	0.322927	0.479	0.439	7.88357e-24	1	AC092490.1
8.20469e-23	0.383699	0.499	0.49	1.64094e-19	1	RUNDC3A
1.22006e-17	0.229866	0.653	0.613	2.44013e-14	1	PMAIP1
2.07841e-15	0.144819	0.6	0.625	4.15682e-12	1	CDT1
7.06757e-11	0.195425	0.774	0.727	1.41351e-07	1	MT2A
1.24866e-10	0.111906	0.563	0.604	2.49732e-07	1	SLC48A1
2.63189e-10	0.388748	0.851	0.864	5.26378e-07	1	DYNLL1
6.91015e-10	0.221608	0.752	0.774	1.38203e-06	1	GCLM
3.77075e-09	0.100311	0.603	0.622	7.54149e-06	1	AREG
3.05889e-08	0.103102	0.527	0.582	6.11778e-05	1	C17orf99
8.35462e-08	0.107952	0.716	0.745	0.000167092	1	COPS3
0.00283221	0.137049	0.683	0.763	1	1	EIF3B
0.00516322	0.112815	0.663	0.635	1	1	DCAF13
0	0.985599	0.999	0.984	0	2	MT-CYB
0	0.942476	0.998	0.975	0	2	MT-ATP6
0	0.824339	1	0.969	0	2	MT-CO2
0	0.82319	0.997	0.981	0	2	MT-ND1
0	0.774487	0.996	0.987	0	2	MT-ND5
0	0.722978	0.998	0.993	0	2	MT-ND4
0	0.720708	0.851	0.526	0	2	GZMK
0	0.712745	0.999	0.992	0	2	MT-CO3
0	0.134722	0.813	0.489	0	2	TPM2
0	0.12857	0.83	0.427	0	2	IGFBP3
5.85984e-233	0.660759	0.857	0.641	1.17197e-229	2	IL7R
5.4712e-211	0.116073	0.771	0.435	1.09424e-207	2	CXCR6
1.79218e-195	0.3399	0.892	0.655	3.58435e-192	2	CCL5
3.26898e-177	0.108466	0.839	0.513	6.53797e-174	2	CCL3
1.74786e-134	0.121081	0.769	0.539	3.49572e-131	2	TRUB2
3.92948e-132	0.256252	0.68	0.411	7.85896e-129	2	RGS1
6.0908e-128	0.114935	0.751	0.545	1.21816e-124	2	MYBBP1A
3.44018e-108	0.120711	0.745	0.463	6.88036e-105	2	CCL4L2
6.02293e-108	0.127996	0.731	0.503	1.20459e-104	2	ACTN1
6.44483e-98	0.305659	0.772	0.609	1.28897e-94	2	CCL4
1.00844e-85	0.350456	0.686	0.465	2.01689e-82	2	TIGIT
2.04738e-75	0.367991	0.645	0.396	4.09476e-72	2	TSHZ2
3.22916e-74	0.407105	0.775	0.614	6.45832e-71	2	TRBC1
3.98263e-71	0.506201	0.653	0.48	7.96526e-68	2	CD8A
8.49794e-71	0.105867	0.742	0.614	1.69959e-67	2	IL2RB
3.2369e-68	0.454886	0.891	0.846	6.47379e-65	2	PNN
7.95644e-67	0.112427	0.666	0.467	1.59129e-63	2	ARMH1
1.89681e-59	0.305598	0.735	0.682	3.79363e-56	2	CDK6
9.8802e-56	0.116098	0.747	0.628	1.97604e-52	2	PLA2G12A
3.08228e-43	0.499853	0.761	0.787	6.16455e-40	2	MT-ND6
2.99208e-42	0.113181	0.755	0.698	5.98417e-39	2	DNAJC11
9.57619e-41	0.104992	0.685	0.548	1.91524e-37	2	CCL3L1
7.79608e-38	1.30749	0.298	0.374	1.55922e-34	2	IGHA1
1.71859e-37	0.227406	0.7	0.607	3.43717e-34	2	FOSB
7.43557e-33	0.407259	0.624	0.589	1.48711e-29	2	TTN
2.33925e-28	0.245526	0.687	0.584	4.6785e-25	2	ATF7IP2
2.00922e-27	0.307728	0.712	0.695	4.01845e-24	2	MLLT3
7.38435e-25	0.111174	0.699	0.645	1.47687e-21	2	NAT10
9.26826e-22	0.286921	0.705	0.693	1.85365e-18	2	SAMHD1
2.44002e-21	0.100388	0.78	0.675	4.88004e-18	2	SOCS2
4.08613e-21	0.284528	0.835	0.867	8.17226e-18	2	SFPQ
4.7875e-21	0.513172	0.617	0.572	9.575e-18	2	TRGC2
3.10364e-19	0.145853	0.563	0.521	6.20728e-16	2	RTKN2
3.98681e-17	0.115062	0.766	0.671	7.97362e-14	2	PKM
7.1728e-17	0.104612	0.642	0.618	1.43456e-13	2	CD160
1.09905e-15	0.133568	0.726	0.68	2.1981e-12	2	NOP14
3.62446e-15	0.143076	0.647	0.764	7.24892e-12	2	CHD4
3.97211e-15	0.282563	0.703	0.655	7.94423e-12	2	PUM3
8.84153e-15	0.155189	0.742	0.711	1.76831e-11	2	ENOSF1
3.14569e-14	0.114913	0.619	0.536	6.29138e-11	2	GZMH
6.11866e-14	0.129441	0.499	0.612	1.22373e-10	2	SLC5A3
2.89556e-13	0.338346	0.765	0.767	5.79113e-10	2	G3BP1
5.34063e-12	0.107178	0.748	0.686	1.06813e-08	2	AC245060.5
7.03852e-11	0.129828	0.503	0.606	1.4077e-07	2	VPS37B
2.22912e-10	0.124523	0.735	0.678	4.45824e-07	2	RMDN1
2.17669e-08	0.10807	0.55	0.67	4.35337e-05	2	RFLNB
5.55722e-08	0.148046	0.683	0.658	0.000111144	2	RREB1
1.7818e-07	1.16218	0.441	0.499	0.00035636	2	IGLC3
1.85149e-07	0.172276	0.588	0.7	0.000370299	2	FKBP5
3.05197e-07	0.240454	0.537	0.472	0.000610394	2	CD8B
1.5937e-05	0.203462	0.77	0.734	0.031874	2	NUCB2
2.8676e-05	0.130564	0.696	0.671	0.0573519	2	MDN1
0.0001519	0.114944	0.729	0.696	0.303801	2	UGGT1
0.000504478	0.162772	0.645	0.7	1	2	SMARCA4
0.00142225	0.123356	0.769	0.709	1	2	SRRT
0.00314965	0.11955	0.814	0.801	1	2	CYTOR
0.00734668	0.298646	0.658	0.712	1	2	MSI2
0.00762827	0.204695	0.559	0.641	1	2	RUNX1
0	2.55345	0.996	0.686	0	3	MYOM2
0	2.49195	0.997	0.615	0	3	GNLY
0	2.30996	0.989	0.52	0	3	FGFBP2
0	2.29558	0.999	0.501	0	3	GZMB
0	1.86025	0.929	0.594	0	3	PTGDS
0	1.85575	0.994	0.594	0	3	FCGR3A
0	1.85575	0.981	0.555	0	3	SPON2
0	1.80571	0.992	0.648	0	3	CCL5
0	1.61677	0.974	0.668	0	3	KLRB1
0	1.58772	0.98	0.549	0	3	KLRF1
0	1.57612	0.967	0.594	0	3	CLIC3
0	1.50789	0.973	0.541	0	3	TRDC
0	1.41676	0.992	0.617	0	3	TYROBP
0	1.39278	0.968	0.63	0	3	FCER1G
0	1.30389	0.985	0.649	0	3	PLEK
0	1.24677	0.946	0.51	0	3	GZMH
0	1.17103	0.966	0.594	0	3	CCL4
0	1.08048	0.982	0.716	0	3	PLAC8
0	1.04774	0.871	0.439	0	3	IGFBP7
0	0.994974	0.932	0.599	0	3	IL2RB
0	0.966289	0.949	0.602	0	3	TRBC1
0	0.929647	0.915	0.448	0	3	S100B
0	0.910654	0.924	0.508	0	3	CCL3
0	0.869518	0.956	0.671	0	3	LGALS1
0	0.86019	0.962	0.691	0	3	ALOX5AP
0	0.838592	0.893	0.581	0	3	AKR1C3
0	0.820995	0.992	0.757	0	3	S100A4
0	0.803174	0.902	0.6	0	3	C12orf75
0	0.690462	0.83	0.477	0	3	HAVCR2
0	0.667192	0.897	0.608	0	3	TRGC1
0	0.657256	0.85	0.601	0	3	CD160
0	0.645759	0.898	0.469	0	3	TNFRSF18
0	0.626114	0.952	0.764	0	3	GSTP1
0	0.610491	0.874	0.608	0	3	CEBPD
0	0.605213	0.899	0.655	0	3	ANXA2
0	0.557418	0.893	0.605	0	3	PGAM1
0	0.477451	0.956	0.791	0	3	DDIT4
0	0.4535	0.871	0.54	0	3	ITGAX
0	0.350678	0.817	0.522	0	3	TLE1
0	0.198489	0.902	0.509	0	3	FGL2
0	0.108786	0.835	0.43	0	3	HPGD
7.03697e-300	0.342516	0.807	0.46	1.40739e-296	3	CCL4L2
1.81235e-296	0.448164	0.765	0.338	3.6247e-293	3	MLC1
2.10812e-295	0.145079	0.776	0.369	4.21625e-292	3	FBP1
4.57565e-281	0.171882	0.791	0.639	9.1513e-278	3	GNAL
9.88426e-280	0.586225	0.897	0.64	1.97685e-276	3	GLRX
4.21343e-249	0.101835	0.766	0.498	8.42686e-246	3	C3AR1
9.1879e-249	0.502775	0.932	0.693	1.83758e-245	3	TPI1
5.82249e-235	0.65881	0.744	0.432	1.1645e-231	3	KLRC1
1.04223e-231	0.317672	0.793	0.439	2.08445e-228	3	XCL2
3.36685e-231	0.308162	0.916	0.678	6.73371e-228	3	S100A11
8.78166e-228	0.119533	0.808	0.539	1.75633e-224	3	CCL3L1
7.51386e-221	0.483694	0.932	0.781	1.50277e-217	3	PRELID1
1.12953e-217	0.480165	0.818	0.572	2.25907e-214	3	MRPS6
1.90119e-215	0.161733	0.75	0.472	3.80238e-212	3	ATP8B4
1.62516e-208	0.273943	0.839	0.604	3.25031e-205	3	CD320
1.02144e-207	0.314071	0.786	0.576	2.04289e-204	3	IFITM3
5.63207e-206	0.454148	0.949	0.748	1.12641e-202	3	ENO1
5.49389e-203	0.220494	0.844	0.661	1.09878e-199	3	HSPA1A
1.16356e-202	0.465243	0.879	0.716	2.32712e-199	3	SERPINB1
4.8383e-199	0.313235	0.778	0.567	9.67659e-196	3	RHOBTB3
2.14602e-195	0.286674	0.763	0.573	4.29204e-192	3	GSN
9.86592e-194	0.122782	0.771	0.608	1.97318e-190	3	AREG
1.81629e-190	0.463846	0.734	0.5	3.63258e-187	3	CD38
4.19114e-186	0.195685	0.834	0.635	8.38228e-183	3	HDAC7
1.27967e-185	0.484386	0.845	0.676	2.55934e-182	3	DSTN
3.47269e-185	0.464459	0.885	0.719	6.94538e-182	3	MT2A
9.89441e-171	0.412457	0.825	0.619	1.97888e-167	3	ISG15
4.49699e-169	0.25563	0.916	0.676	8.99397e-166	3	SAMHD1
4.78041e-166	0.370421	0.919	0.77	9.56082e-163	3	ATP5MC3
1.20744e-158	0.345205	0.995	0.876	2.41488e-155	3	NCL
7.6483e-157	0.387422	0.794	0.653	1.52966e-153	3	MANF
3.68523e-147	0.363822	0.96	0.828	7.37045e-144	3	HSPA8
1.38608e-146	0.448265	0.956	0.865	2.77215e-143	3	CALR
2.09628e-141	0.368035	0.823	0.698	4.19256e-138	3	C1orf162
1.49947e-137	0.145073	0.813	0.61	2.99895e-134	3	TIMP1
1.95625e-130	0.154606	0.811	0.611	3.91249e-127	3	AK2
2.04876e-130	0.337773	0.88	0.764	4.09752e-127	3	SRSF9
6.85613e-130	0.322827	0.858	0.718	1.37123e-126	3	OSTC
1.11215e-128	0.372996	0.879	0.745	2.2243e-125	3	YWHAQ
1.48543e-127	0.297859	0.983	0.875	2.97087e-124	3	PPIA
3.82296e-124	0.199174	0.931	0.801	7.64593e-121	3	S100A10
6.50658e-122	0.224031	0.721	0.464	1.30132e-118	3	TIGIT
2.27594e-116	0.239788	0.745	0.592	4.55187e-113	3	SLC5A3
4.34573e-115	0.225131	0.932	0.838	8.69146e-112	3	HSPA5
1.10011e-112	0.198203	0.759	0.585	2.20021e-109	3	VPS37B
3.77995e-110	0.312779	0.876	0.773	7.5599e-107	3	NOP10
5.42616e-109	0.179341	0.819	0.605	1.08523e-105	3	ECHS1
8.206e-109	0.298987	0.828	0.675	1.6412e-105	3	ADH5
8.92483e-109	0.320601	0.791	0.659	1.78497e-105	3	MYDGF
9.30385e-109	0.233684	0.763	0.605	1.86077e-105	3	BID
8.86563e-107	0.334357	0.782	0.623	1.77313e-103	3	LYAR
1.0497e-104	0.187397	0.828	0.661	2.09941e-101	3	ARL2
1.55623e-104	0.265251	0.914	0.841	3.11246e-101	3	PARK7
5.56224e-104	0.294406	0.883	0.776	1.11245e-100	3	ATP5ME
3.17019e-103	0.269537	0.844	0.694	6.34038e-100	3	PSMA3
2.5408e-101	0.317446	0.859	0.739	5.0816e-98	3	PDIA6
1.25954e-100	0.302739	0.834	0.675	2.51908e-97	3	ECH1
1.26073e-100	0.306471	0.849	0.746	2.52145e-97	3	POLR2L
6.88572e-100	0.283513	1	0.914	1.37714e-96	3	PTMA
7.60227e-100	0.258022	0.878	0.697	1.52045e-96	3	SRI
1.02929e-99	0.254688	0.864	0.712	2.05858e-96	3	NDUFAB1
9.74184e-98	0.271207	0.887	0.735	1.94837e-94	3	SNRPB
1.95725e-92	0.236985	0.964	0.841	3.9145e-89	3	PNN
4.81241e-91	0.236848	0.922	0.806	9.62481e-88	3	HSP90B1
6.00854e-91	0.286019	0.857	0.755	1.20171e-87	3	BANF1
2.5299e-89	0.279226	0.863	0.731	5.0598e-86	3	PSMB3
9.13171e-89	0.268145	0.877	0.747	1.82634e-85	3	ANP32A
5.06742e-87	0.259724	0.827	0.688	1.01348e-83	3	NAA38
8.64716e-87	0.225569	0.985	0.872	1.72943e-83	3	HNRNPA1
1.29833e-86	0.211981	0.805	0.635	2.59666e-83	3	NDUFV1
2.97567e-86	0.186023	0.871	0.732	5.95135e-83	3	CAPRIN1
4.56649e-84	0.234279	0.971	0.909	9.13297e-81	3	CHCHD2
9.45078e-84	0.302891	0.828	0.74	1.89016e-80	3	NDUFB3
2.84659e-83	0.110398	0.617	0.322	5.69319e-80	3	ZNF683
1.00291e-82	0.244879	0.895	0.787	2.00583e-79	3	SSBP1
9.67707e-82	0.230945	0.783	0.718	1.93541e-78	3	PCNX4
1.16346e-80	0.224507	0.849	0.729	2.32692e-77	3	MRPS34
6.78376e-80	0.220754	0.797	0.68	1.35675e-76	3	EIF6
8.13011e-80	0.236197	0.913	0.79	1.62602e-76	3	PPM1G
8.30487e-80	0.22103	0.837	0.674	1.66097e-76	3	LDHA
2.16247e-78	0.148948	0.996	0.907	4.32494e-75	3	HMGB1
3.37902e-76	0.227587	0.893	0.789	6.75804e-73	3	MAP2K2
3.98801e-75	0.241553	0.835	0.737	7.97602e-72	3	PSMB2
1.8735e-74	0.227419	0.819	0.669	3.74701e-71	3	PGK1
7.24087e-74	0.215865	0.855	0.715	1.44817e-70	3	JPT1
3.28876e-72	0.110512	0.74	0.611	6.57752e-69	3	TSFM
1.24379e-70	0.248806	0.864	0.762	2.48759e-67	3	PSMA4
1.71933e-68	0.165335	0.761	0.589	3.43865e-65	3	MRPS26
2.49261e-68	0.111145	0.686	0.503	4.98522e-65	3	ISOC1
1.03729e-67	0.146353	0.689	0.526	2.07458e-64	3	UTP11
1.8034e-66	0.131908	0.784	0.65	3.6068e-63	3	TFAM
2.02081e-66	0.212952	0.87	0.753	4.04161e-63	3	CANX
2.70064e-66	0.100043	0.881	0.731	5.40128e-63	3	NASP
1.06828e-64	0.199943	0.918	0.8	2.13656e-61	3	HMGN1
3.24089e-64	0.179345	0.879	0.764	6.48177e-61	3	CCT3
4.60602e-62	0.1874	0.776	0.641	9.21205e-59	3	PHB
2.33079e-61	0.157299	0.765	0.678	4.66159e-58	3	CASP3
1.29854e-60	0.136406	0.779	0.652	2.59708e-57	3	MRPL13
4.52096e-60	0.14364	0.778	0.659	9.04193e-57	3	MLEC
5.21999e-60	0.191791	0.867	0.791	1.044e-56	3	ATP5PF
2.65597e-59	0.207249	0.842	0.742	5.31195e-56	3	CYCS
3.80314e-59	0.206458	0.776	0.653	7.60628e-56	3	GTF3C6
1.18651e-56	0.170522	0.829	0.733	2.37302e-53	3	NUDC
6.21073e-56	0.1416	0.707	0.561	1.24215e-52	3	CIAPIN1
2.45177e-55	0.214969	0.732	0.657	4.90354e-52	3	PPID
4.40411e-54	0.109329	0.812	0.704	8.80821e-51	3	DDX54
3.61491e-53	0.102087	0.753	0.616	7.22982e-50	3	FAM136A
1.3563e-52	0.113933	0.788	0.664	2.71261e-49	3	ACSS1
1.44262e-52	0.18583	0.865	0.794	2.88524e-49	3	P4HB
4.25152e-52	0.104812	0.724	0.639	8.50304e-49	3	IFIT2
8.62826e-52	0.204029	0.883	0.789	1.72565e-48	3	HNRNPM
1.50478e-51	0.184201	0.761	0.672	3.00955e-48	3	SDHD
7.5085e-51	0.154305	0.938	0.832	1.5017e-47	3	HNRNPD
8.99292e-51	0.189207	0.908	0.808	1.79858e-47	3	SRSF3
1.01417e-50	0.112424	0.75	0.646	2.02833e-47	3	MTCH2
7.81237e-50	0.117603	0.867	0.729	1.56247e-46	3	SYNCRIP
1.61841e-49	0.101372	0.789	0.657	3.23682e-46	3	SF3A3
1.71941e-48	0.207324	0.697	0.585	3.43882e-45	3	ATOX1
1.73365e-48	0.16774	0.849	0.746	3.46729e-45	3	GTF3A
2.71251e-48	0.157502	0.847	0.779	5.42502e-45	3	CCT5
3.65996e-48	0.187152	0.827	0.755	7.31993e-45	3	NDUFS6
2.55352e-47	0.155956	0.911	0.859	5.10704e-44	3	DYNLL1
7.7338e-47	0.156437	0.762	0.643	1.54676e-43	3	MRPL47
1.84088e-46	0.137624	0.733	0.595	3.68176e-43	3	IMP4
1.02083e-45	0.20756	0.724	0.601	2.04165e-42	3	MINOS1
1.30342e-44	0.2861	0.675	0.607	2.60685e-41	3	SDF2L1
1.413e-44	0.138536	0.798	0.698	2.82599e-41	3	PFDN6
1.49917e-43	0.13028	0.85	0.766	2.99834e-40	3	COX5A
3.85743e-42	0.11729	0.716	0.593	7.71485e-39	3	LAP3
2.98399e-41	0.124714	0.78	0.706	5.96798e-38	3	STIP1
4.76621e-41	0.149435	0.747	0.688	9.53242e-38	3	MCTS1
3.43036e-40	0.1806	0.836	0.774	6.86072e-37	3	MRPL20
3.91222e-40	0.111605	0.731	0.651	7.82445e-37	3	NDUFAF4
4.67599e-40	0.197759	0.746	0.648	9.35198e-37	3	VDAC1
4.98167e-40	0.125669	0.769	0.643	9.96333e-37	3	SSSCA1
6.50659e-40	0.14559	0.927	0.856	1.30132e-36	3	XRCC5
2.37278e-39	0.143481	0.867	0.786	4.74557e-36	3	SNRPD3
6.96773e-39	0.150822	0.87	0.792	1.39355e-35	3	ERH
2.06434e-37	0.170977	0.827	0.78	4.12868e-34	3	CLTA
3.16904e-37	0.119722	0.941	0.869	6.33808e-34	3	EIF3A
7.35731e-37	0.121262	0.75	0.646	1.47146e-33	3	NDUFA8
1.51619e-35	0.148589	0.786	0.748	3.03237e-32	3	SNRPC
3.31392e-35	0.174291	0.778	0.721	6.62784e-32	3	MDH2
2.67842e-34	0.146426	0.867	0.792	5.35683e-31	3	COX7B
9.16838e-34	0.13159	0.839	0.767	1.83368e-30	3	SNRPG
1.02867e-33	0.155674	0.346	0.279	2.05734e-30	3	LAIR2
1.22884e-33	0.13455	0.864	0.793	2.45769e-30	3	XRCC6
9.1377e-33	0.147734	0.838	0.787	1.82754e-29	3	VDAC3
4.01975e-32	0.11587	0.848	0.799	8.0395e-29	3	TUFM
8.47498e-30	0.104802	0.715	0.631	1.695e-26	3	DCAF13
8.81703e-29	0.139649	0.61	0.497	1.76341e-25	3	MT1X
1.1968e-28	0.108139	0.852	0.807	2.39359e-25	3	ATP5MF
3.03875e-28	0.142654	0.802	0.748	6.0775e-25	3	ATP5F1C
1.38133e-27	0.160021	0.702	0.632	2.76265e-24	3	HSD17B10
2.36313e-27	0.128661	0.754	0.687	4.72625e-24	3	MRPS7
4.11535e-27	0.114753	0.79	0.709	8.23069e-24	3	UQCRQ
2.3366e-25	0.136417	0.776	0.712	4.67321e-22	3	LSM2
1.94275e-23	0.10705	0.693	0.618	3.8855e-20	3	HPF1
6.45808e-22	0.112093	0.784	0.701	1.29162e-18	3	TXN2
6.27034e-21	0.114691	0.735	0.654	1.25407e-17	3	DNAJC19
1.83628e-20	0.106218	0.776	0.694	3.67256e-17	3	WBP11
1.62793e-19	0.170241	0.659	0.632	3.25586e-16	3	MRPS12
2.47073e-19	0.126564	0.663	0.598	4.94146e-16	3	WDR46
7.41919e-19	0.108211	0.764	0.708	1.48384e-15	3	NDUFS3
3.49242e-18	0.100666	0.781	0.725	6.98484e-15	3	MRPL51
2.01371e-17	0.109694	0.722	0.657	4.02743e-14	3	NIFK
2.03077e-17	0.124998	0.782	0.745	4.06153e-14	3	UQCRFS1
1.60645e-16	0.101476	0.779	0.737	3.21291e-13	3	CCT7
1.33523e-14	0.121139	0.639	0.585	2.67046e-11	3	IFI6
1.76587e-12	0.103611	0.611	0.557	3.53173e-09	3	EXOSC7
7.04253e-12	0.125726	0.643	0.617	1.40851e-08	3	NAA20
1.08052e-10	0.132987	0.652	0.642	2.16103e-07	3	TXNDC17
1.56387e-10	0.206706	0.633	0.675	3.12773e-07	3	GCHFR
2.61597e-10	0.107878	0.682	0.66	5.23194e-07	3	NDUFA9
6.93857e-10	0.106016	0.7	0.685	1.38771e-06	3	SNRNP40
0	1.98761	0.997	0.681	0	4	HEMGN
0	1.86768	0.974	0.69	0	4	HIST1H4C
0	1.85478	0.997	0.712	0	4	CA2
0	1.80964	0.997	0.828	0	4	CA1
0	1.74059	0.981	0.64	0	4	HIST1H1B
0	1.6307	0.997	0.632	0	4	MKI67
0	1.62863	0.999	0.757	0	4	HMGB2
0	1.60204	0.992	0.893	0	4	PRDX2
0	1.60029	0.978	0.602	0	4	RRM2
0	1.59034	0.99	0.687	0	4	GYPA
0	1.56791	0.997	0.725	0	4	H1F0
0	1.51108	0.998	0.872	0	4	HBM
0	1.48225	0.997	0.848	0	4	AHSP
0	1.45967	0.982	0.576	0	4	NUSAP1
0	1.44615	1	0.728	0	4	TFRC
0	1.4186	0.989	0.658	0	4	ATAD2
0	1.41243	0.982	0.786	0	4	GYPB
0	1.41043	0.969	0.6	0	4	HES6
0	1.40952	0.989	0.783	0	4	UROD
0	1.39193	0.993	0.774	0	4	TUBA1B
0	1.30279	0.995	0.691	0	4	SMC4
0	1.25523	0.99	0.671	0	4	CPOX
0	1.25428	0.992	0.816	0	4	TUBB
0	1.25361	0.995	0.905	0	4	HIST1H1E
0	1.24159	0.992	0.706	0	4	NSD2
0	1.2316	0.997	0.668	0	4	SPTA1
0	1.2194	0.976	0.61	0	4	PCLAF
0	1.19884	0.982	0.828	0	4	MGST3
0	1.17341	0.984	0.666	0	4	SMC2
0	1.16745	0.993	0.746	0	4	SOX6
0	1.16029	0.981	0.667	0	4	ABCB10
0	1.13959	0.995	0.822	0	4	BLVRB
0	1.12726	0.986	0.674	0	4	UBAC1
0	1.12307	0.982	0.692	0	4	TFDP1
0	1.11352	0.97	0.572	0	4	ESCO2
0	1.10967	0.994	0.715	0	4	HMBS
0	1.10858	0.983	0.834	0	4	HIST1H1D
0	1.08161	0.969	0.467	0	4	CLSPN
0	1.07544	0.971	0.542	0	4	TOP2A
0	1.07053	0.957	0.67	0	4	PCNA
0	1.05012	0.978	0.633	0	4	EZH2
0	1.03538	0.96	0.59	0	4	RHCE
0	1.0351	0.984	0.617	0	4	CENPF
0	1.03372	0.986	0.68	0	4	RHAG
0	1.02584	0.969	0.72	0	4	DUT
0	1.01676	0.965	0.635	0	4	ATAD5
0	1.0146	0.987	0.867	0	4	HIST1H1C
0	1.00704	0.975	0.717	0	4	DNAJC9
0	1.00122	0.912	0.682	0	4	ASNS
0	0.993733	0.971	0.672	0	4	RRM1
0	0.993329	0.983	0.808	0	4	HBD
0	0.988267	0.982	0.572	0	4	TMEM56
0	0.988097	0.969	0.718	0	4	CD36
0	0.98411	0.952	0.736	0	4	MYL4
0	0.977228	0.961	0.56	0	4	DHFR
0	0.967402	0.988	0.73	0	4	ALAD
0	0.966316	0.889	0.588	0	4	HIST1H3B
0	0.949936	0.931	0.55	0	4	MCM4
0	0.944712	0.941	0.591	0	4	TK1
0	0.939467	0.949	0.56	0	4	TUBG1
0	0.932944	0.991	0.925	0	4	YBX1
0	0.93217	0.967	0.659	0	4	TPX2
0	0.92744	0.973	0.745	0	4	IDH2
0	0.926934	0.972	0.615	0	4	C21orf58
0	0.92566	0.976	0.57	0	4	MBOAT2
0	0.925388	0.938	0.599	0	4	CDT1
0	0.922072	0.934	0.615	0	4	MTHFD2
0	0.912697	0.905	0.563	0	4	HIST1H2AH
0	0.911427	0.989	0.813	0	4	HMGN2
0	0.898286	0.954	0.605	0	4	BRCA1
0	0.897599	0.981	0.741	0	4	KLF1
0	0.895503	0.955	0.583	0	4	BRCA2
0	0.884192	0.963	0.571	0	4	MYBL2
0	0.877046	0.901	0.439	0	4	HIST1H3G
0	0.87546	0.976	0.781	0	4	H2AFZ
0	0.874764	0.962	0.646	0	4	KNL1
0	0.862871	0.938	0.565	0	4	TYMS
0	0.861983	0.95	0.633	0	4	MCM7
0	0.857477	0.943	0.608	0	4	E2F8
0	0.856531	0.967	0.655	0	4	RFESD
0	0.855976	0.938	0.527	0	4	CDK1
0	0.854746	0.922	0.497	0	4	CENPU
0	0.846568	0.967	0.791	0	4	ATP5IF1
0	0.834209	0.98	0.739	0	4	CBX5
0	0.828279	0.955	0.731	0	4	TMEM14C
0	0.82312	0.952	0.562	0	4	FBXO5
0	0.820727	0.943	0.576	0	4	WDR76
0	0.812477	0.963	0.643	0	4	NFIA
0	0.809598	0.945	0.588	0	4	DLGAP5
0	0.807736	0.961	0.656	0	4	UBE2S
0	0.806243	0.946	0.641	0	4	OAT
0	0.806214	0.946	0.764	0	4	TMEM14B
0	0.802036	0.927	0.532	0	4	AQP1
0	0.80123	0.893	0.556	0	4	HELLS
0	0.799626	0.925	0.666	0	4	HIST2H2AC
0	0.799119	0.939	0.598	0	4	UBE2T
0	0.791987	0.949	0.537	0	4	KIF11
0	0.791762	0.94	0.438	0	4	KIF15
0	0.788865	0.95	0.522	0	4	SLC22A16
0	0.783828	0.93	0.683	0	4	SLBP
0	0.783004	0.984	0.768	0	4	HNRNPAB
0	0.778036	0.944	0.69	0	4	DHRS13
0	0.769084	0.952	0.625	0	4	BIRC5
0	0.762951	0.86	0.498	0	4	HIST1H3F
0	0.760544	0.969	0.788	0	4	EPRS
0	0.757326	0.943	0.67	0	4	FANCI
0	0.754982	0.97	0.608	0	4	TRIM10
0	0.751833	0.973	0.785	0	4	HDGF
0	0.750252	0.948	0.68	0	4	MINPP1
0	0.749366	0.934	0.627	0	4	UROS
0	0.743768	0.917	0.57	0	4	GFI1B
0	0.738488	0.959	0.697	0	4	KMT5A
0	0.736305	0.996	0.907	0	4	HMGB1
0	0.736119	0.973	0.757	0	4	GCLM
0	0.733506	0.937	0.554	0	4	MYH10
0	0.730814	0.966	0.708	0	4	TUBB4B
0	0.730417	0.954	0.66	0	4	DAAM1
0	0.718492	0.96	0.677	0	4	TPM1
0	0.716584	0.869	0.558	0	4	CCNE2
0	0.700915	0.952	0.702	0	4	MPC2
0	0.697297	0.967	0.59	0	4	EPB42
0	0.694371	0.858	0.672	0	4	AC024267.1
0	0.693539	0.959	0.649	0	4	PRKAR2B
0	0.687551	0.921	0.598	0	4	ZWINT
0	0.681169	0.932	0.522	0	4	DIAPH3
0	0.678288	0.936	0.557	0	4	CCNA2
0	0.675611	0.967	0.735	0	4	METAP2
0	0.673437	0.941	0.681	0	4	ABHD5
0	0.668835	0.911	0.481	0	4	NCAPG
0	0.665705	0.933	0.637	0	4	CENPE
0	0.660719	0.955	0.721	0	4	GATA1
0	0.65295	0.948	0.696	0	4	TSPO2
0	0.650302	0.978	0.81	0	4	CLTC
0	0.647148	0.948	0.599	0	4	SSX2IP
0	0.643992	0.944	0.684	0	4	SMIM1
0	0.642639	0.918	0.514	0	4	PRC1
0	0.639708	0.922	0.655	0	4	RPA3
0	0.628003	0.806	0.63	0	4	PSAT1
0	0.622681	0.925	0.56	0	4	NDC80
0	0.621525	0.938	0.663	0	4	ASPM
0	0.617975	0.928	0.595	0	4	CKAP2L
0	0.613284	0.971	0.773	0	4	PRKDC
0	0.612864	0.929	0.667	0	4	NUDT1
0	0.608854	0.892	0.665	0	4	HLTF
0	0.606931	0.886	0.491	0	4	CDC6
0	0.605358	0.935	0.742	0	4	IARS
0	0.604238	0.889	0.594	0	4	MXD3
0	0.598607	0.908	0.551	0	4	ADD2
0	0.598254	0.906	0.597	0	4	RBBP8
0	0.591577	0.905	0.58	0	4	HEBP1
0	0.59104	0.869	0.518	0	4	DTL
0	0.585183	0.933	0.539	0	4	RAD51AP1
0	0.585076	0.94	0.727	0	4	COPS3
0	0.583639	0.883	0.582	0	4	FEN1
0	0.5809	0.918	0.399	0	4	KIFC1
0	0.578511	0.904	0.607	0	4	CDCA4
0	0.578427	0.944	0.691	0	4	GMPS
0	0.578409	0.901	0.489	0	4	CR1L
0	0.577335	0.896	0.606	0	4	GYPE
0	0.576242	0.894	0.47	0	4	HMGB3
0	0.575325	0.894	0.603	0	4	GMNN
0	0.572385	0.889	0.37	0	4	STIL
0	0.569329	0.91	0.523	0	4	POLQ
0	0.567247	0.856	0.579	0	4	CCNE1
0	0.563418	0.916	0.596	0	4	CDKN3
0	0.561798	0.941	0.696	0	4	CCDC14
0	0.559444	0.912	0.594	0	4	NUF2
0	0.55924	0.905	0.564	0	4	SKA1
0	0.556535	0.931	0.664	0	4	STMN1
0	0.556455	0.863	0.56	0	4	ORC6
0	0.549696	0.928	0.643	0	4	CKAP2
0	0.547055	0.866	0.381	0	4	ARHGAP23
0	0.544445	0.929	0.657	0	4	HAT1
0	0.544431	0.93	0.644	0	4	VRK1
0	0.541215	0.94	0.666	0	4	TFR2
0	0.539206	0.922	0.688	0	4	KIF20B
0	0.537247	0.979	0.835	0	4	RAN
0	0.536371	0.916	0.651	0	4	CEP152
0	0.534839	0.939	0.648	0	4	LIG1
0	0.533154	0.796	0.56	0	4	HIST1H2AL
0	0.532472	0.918	0.622	0	4	CHAF1A
0	0.531948	0.896	0.647	0	4	ERFE
0	0.531627	0.893	0.628	0	4	HJURP
0	0.528513	0.942	0.679	0	4	SIVA1
0	0.527964	0.886	0.585	0	4	TMEM106C
0	0.527906	0.861	0.604	0	4	MCM5
0	0.526816	0.886	0.517	0	4	CENPW
0	0.526604	0.886	0.566	0	4	SGO1
0	0.526553	0.916	0.643	0	4	PTTG1
0	0.524821	0.922	0.653	0	4	TACC3
0	0.523214	0.88	0.557	0	4	PLEKHH3
0	0.520682	0.996	0.972	0	4	FTH1
0	0.520177	0.844	0.565	0	4	MCM10
0	0.520117	0.91	0.553	0	4	SHCBP1
0	0.518974	0.918	0.586	0	4	H2AFX
0	0.51896	0.863	0.507	0	4	CENPM
0	0.518942	0.872	0.535	0	4	PKMYT1
0	0.517839	0.884	0.625	0	4	BOLA3
0	0.516549	0.932	0.616	0	4	HMMR
0	0.509639	0.881	0.595	0	4	KIF2C
0	0.504573	0.921	0.651	0	4	AMMECR1
0	0.503226	0.92	0.658	0	4	SLC38A5
0	0.502919	0.898	0.604	0	4	KIF23
0	0.501573	0.892	0.573	0	4	RFC4
0	0.498266	0.929	0.655	0	4	RANBP1
0	0.497601	0.877	0.63	0	4	LRRCC1
0	0.493916	0.882	0.576	0	4	DNAJA4
0	0.480257	0.91	0.563	0	4	MSH2
0	0.47953	0.901	0.658	0	4	CCNF
0	0.478202	0.871	0.565	0	4	MND1
0	0.475792	0.869	0.539	0	4	WDHD1
0	0.475071	0.875	0.6	0	4	ACKR1
0	0.473163	0.905	0.528	0	4	CIP2A
0	0.470599	0.905	0.621	0	4	CENPN
0	0.469373	0.875	0.596	0	4	ECT2
0	0.468924	0.967	0.79	0	4	CYTOR
0	0.468334	0.942	0.71	0	4	CYC1
0	0.465922	0.885	0.639	0	4	MMS22L
0	0.463083	0.938	0.697	0	4	ENOSF1
0	0.461687	0.857	0.356	0	4	PBK
0	0.460736	0.872	0.582	0	4	GTSE1
0	0.45999	0.88	0.624	0	4	RFC3
0	0.459199	0.871	0.41	0	4	SPC24
0	0.457509	0.856	0.594	0	4	CCDC34
0	0.452817	0.916	0.701	0	4	SSRP1
0	0.452426	0.914	0.613	0	4	CDC42BPA
0	0.449903	0.877	0.601	0	4	C9orf40
0	0.448891	0.898	0.634	0	4	NCEH1
0	0.448415	0.848	0.599	0	4	MCM2
0	0.448411	0.891	0.469	0	4	BCAM
0	0.448091	0.936	0.714	0	4	NAA50
0	0.447069	0.846	0.344	0	4	E2F7
0	0.438178	0.904	0.601	0	4	SNRNP25
0	0.433353	0.873	0.584	0	4	ASF1B
0	0.431028	0.881	0.558	0	4	CIT
0	0.428573	0.858	0.5	0	4	E2F1
0	0.424406	0.822	0.637	0	4	HIST1H2BH
0	0.422868	0.877	0.539	0	4	HMGN5
0	0.422757	0.941	0.709	0	4	BCL11A
0	0.41773	0.86	0.527	0	4	ANLN
0	0.417387	0.848	0.624	0	4	KEL
0	0.413052	0.866	0.671	0	4	FAM13A
0	0.402981	0.782	0.475	0	4	HIST1H2AJ
0	0.398633	0.883	0.472	0	4	KIF4A
0	0.395914	0.879	0.627	0	4	SLC39A3
0	0.390919	0.869	0.626	0	4	CENPH
0	0.390462	0.818	0.489	0	4	ATP1B2
0	0.388529	0.848	0.476	0	4	BRIP1
0	0.386935	0.857	0.608	0	4	LRR1
0	0.384381	0.831	0.561	0	4	NCAPH
0	0.38379	0.83	0.595	0	4	SLC43A1
0	0.374543	0.828	0.508	0	4	PLK4
0	0.370552	0.856	0.517	0	4	ARHGAP11A
0	0.368809	0.863	0.491	0	4	BUB1B
0	0.366531	0.905	0.604	0	4	CTNNAL1
0	0.365568	0.824	0.588	0	4	CHEK1
0	0.365192	0.878	0.598	0	4	DTYMK
0	0.363408	0.837	0.354	0	4	SPC25
0	0.360875	0.862	0.449	0	4	CCNB2
0	0.360668	0.88	0.655	0	4	MRPL37
0	0.360206	0.782	0.475	0	4	HIST1H2AM
0	0.356221	0.838	0.494	0	4	UHRF1
0	0.356081	0.839	0.505	0	4	ART4
0	0.350998	0.878	0.631	0	4	SGO2
0	0.348142	0.798	0.391	0	4	CHAC1
0	0.346224	0.801	0.426	0	4	HIST1H2BB
0	0.338811	0.828	0.49	0	4	POLA1
0	0.335515	0.795	0.46	0	4	CDCA5
0	0.334789	0.819	0.555	0	4	STEAP3
0	0.32831	0.88	0.664	0	4	DSN1
0	0.32785	0.802	0.409	0	4	XK
0	0.321921	0.844	0.559	0	4	CDCA8
0	0.311767	0.851	0.481	0	4	DEPDC1
0	0.30885	0.816	0.531	0	4	DEPDC1B
0	0.305682	0.835	0.623	0	4	AURKB
0	0.301308	0.835	0.548	0	4	SPAG5
0	0.293382	0.865	0.599	0	4	AURKA
0	0.290625	0.803	0.596	0	4	EXO1
0	0.281914	0.831	0.42	0	4	ORC1
0	0.269665	0.828	0.335	0	4	CDCA2
0	0.248972	0.827	0.497	0	4	BUB1
0	0.235281	0.759	0.344	0	4	SLC25A21
0	0.228317	0.846	0.585	0	4	UBE2C
0	0.225491	0.831	0.567	0	4	A4GALT
0	0.198989	0.802	0.632	0	4	ID1
8.41618e-308	0.428456	0.889	0.612	1.68324e-304	4	MCM3
1.75543e-306	0.407952	0.905	0.634	3.51087e-303	4	DBF4
6.31854e-305	0.377634	0.861	0.589	1.26371e-301	4	MCUR1
4.85158e-302	0.352077	0.863	0.588	9.70315e-299	4	C19orf48
6.2171e-299	0.312244	0.818	0.62	1.24342e-295	4	RACGAP1
1.43994e-296	0.297605	0.851	0.655	2.87987e-293	4	CEP57L1
4.8876e-296	0.244437	0.731	0.342	9.7752e-293	4	CDC25A
1.16539e-295	0.458919	0.964	0.786	2.33078e-292	4	PPM1G
9.00459e-294	0.418371	0.814	0.607	1.80092e-290	4	SAC3D1
1.55654e-293	0.371345	0.837	0.634	3.11307e-290	4	KCNH2
3.87619e-293	0.486185	0.944	0.658	7.75237e-290	4	ODC1
2.57258e-292	0.436218	0.858	0.604	5.14516e-289	4	MSH6
6.88085e-292	0.762606	0.999	0.974	1.37617e-288	4	HBA1
4.37541e-289	0.437936	0.951	0.763	8.75081e-286	4	HMGA1
2.46048e-286	0.463486	0.948	0.759	4.92095e-283	4	SNRPG
7.38571e-286	0.543461	0.941	0.71	1.47714e-282	4	RIF1
1.0109e-285	0.368889	0.895	0.679	2.0218e-282	4	CKAP5
1.22096e-285	0.270835	0.794	0.584	2.44192e-282	4	CDCA3
3.12632e-285	0.406038	0.873	0.667	6.25264e-282	4	CENPX
5.44699e-285	0.299203	0.836	0.549	1.0894e-281	4	PSMG1
1.51691e-284	0.2814	0.861	0.623	3.03383e-281	4	LMNB1
4.84027e-284	0.243287	0.853	0.565	9.68053e-281	4	POLD2
4.82055e-283	0.236609	0.741	0.516	9.6411e-280	4	FUT1
2.80054e-280	0.295689	0.824	0.583	5.60107e-277	4	SLC48A1
1.93868e-278	0.519404	0.98	0.782	3.87736e-275	4	SRSF2
1.90509e-277	0.349868	0.847	0.506	3.81018e-274	4	CTSL
5.42566e-276	0.67686	1	0.99	1.08513e-272	4	HBA2
9.90558e-276	0.414627	0.888	0.662	1.98112e-272	4	SMIM5
4.99109e-275	0.266558	0.848	0.637	9.98218e-272	4	CSE1L
8.15026e-275	0.336854	0.877	0.642	1.63005e-271	4	ACAT1
1.21072e-273	0.504288	0.911	0.691	2.42144e-270	4	FAM117A
8.76775e-273	0.386477	0.901	0.686	1.75355e-269	4	TPGS2
5.08221e-271	0.251078	0.88	0.639	1.01644e-267	4	HAUS6
1.13851e-270	0.366509	0.807	0.651	2.27703e-267	4	VEGFA
5.29464e-270	0.259752	0.752	0.447	1.05893e-266	4	PYCR1
4.15771e-269	0.347932	0.881	0.595	8.31543e-266	4	UQCC2
1.53365e-268	0.335389	0.888	0.7	3.06729e-265	4	ALYREF
2.86874e-266	0.28895	0.837	0.64	5.73747e-263	4	WEE1
3.66542e-265	0.589634	1	1	7.33084e-262	4	HBB
5.95715e-265	0.298079	0.783	0.551	1.19143e-261	4	PXMP2
5.20981e-261	0.267166	0.885	0.646	1.04196e-257	4	CKS2
1.7737e-259	0.249745	0.75	0.48	3.5474e-256	4	GGH
5.22998e-258	0.213422	0.835	0.584	1.046e-254	4	GOLIM4
1.09787e-257	0.157443	0.77	0.512	2.19575e-254	4	MGLL
2.0549e-256	0.244133	0.737	0.44	4.10981e-253	4	LTBP1
3.0856e-256	0.254353	0.733	0.506	6.17119e-253	4	HIST1H2BO
1.04451e-255	0.379306	0.967	0.781	2.08903e-252	4	H2AFY
1.73654e-255	0.35	0.919	0.714	3.47309e-252	4	PSMD1
5.3789e-252	0.205238	0.759	0.546	1.07578e-248	4	SKA3
7.92941e-252	0.262245	0.855	0.635	1.58588e-248	4	NCAPD2
1.63288e-250	0.37593	0.954	0.777	3.26577e-247	4	EIF4G1
1.85769e-248	0.220436	0.937	0.658	3.71537e-245	4	GADD45A
6.66369e-244	0.200629	0.788	0.558	1.33274e-240	4	PARPBP
1.48305e-243	0.487609	0.827	0.623	2.9661e-240	4	EIF4EBP1
5.43128e-243	0.230522	0.775	0.538	1.08626e-239	4	TEX30
1.42938e-241	0.301583	0.861	0.658	2.85877e-238	4	CHCHD3
6.13237e-240	0.24693	0.827	0.589	1.22647e-236	4	PCCB
5.36002e-239	0.428674	0.752	0.504	1.072e-235	4	GINS2
1.91533e-238	0.43057	0.935	0.731	3.83066e-235	4	CCT2
2.59957e-238	0.342129	0.839	0.616	5.19914e-235	4	POLD3
7.73356e-237	0.384352	0.856	0.679	1.54671e-233	4	NME4
9.13994e-237	0.2479	0.739	0.467	1.82799e-233	4	FHL2
3.31667e-236	0.253586	0.895	0.749	6.63334e-233	4	MIR4435-2HG
7.4697e-236	0.228992	0.867	0.686	1.49394e-232	4	FH
6.86365e-231	0.154024	0.812	0.644	1.37273e-227	4	PRR11
8.09438e-230	0.294424	0.773	0.597	1.61888e-226	4	XRCC2
4.30982e-228	0.137734	0.759	0.56	8.61964e-225	4	KIF14
4.4609e-227	0.337941	0.823	0.626	8.9218e-224	4	CKS1B
1.10418e-226	0.175867	0.769	0.568	2.20835e-223	4	KIF18A
7.04128e-226	0.335048	0.92	0.704	1.40826e-222	4	PSMD12
2.23745e-224	0.333941	0.902	0.703	4.4749e-221	4	PSMC3
1.3363e-223	0.200714	0.693	0.444	2.67261e-220	4	ADM
1.60274e-222	0.270591	0.875	0.755	3.20547e-219	4	HSDL2
3.29542e-220	0.280945	0.815	0.635	6.59083e-217	4	ABCC5
5.71823e-220	0.258546	0.827	0.624	1.14365e-216	4	LPCAT3
6.48365e-219	0.26504	0.841	0.629	1.29673e-215	4	ATP13A3
5.71807e-218	0.173721	0.736	0.541	1.14361e-214	4	TRIP13
6.47762e-218	0.237684	0.744	0.53	1.29552e-214	4	NCS1
1.3356e-216	0.188553	0.762	0.555	2.67119e-213	4	GCAT
1.52296e-216	0.154548	0.756	0.508	3.04592e-213	4	FAM83D
4.26563e-215	0.209436	0.822	0.663	8.53126e-212	4	ZNRF1
3.72493e-214	0.260803	0.903	0.698	7.44986e-211	4	SRPK1
2.04634e-213	0.418662	0.802	0.639	4.09269e-210	4	MCM6
2.9233e-213	0.268818	0.877	0.694	5.84661e-210	4	MPST
4.32522e-212	0.232293	0.872	0.636	8.65044e-209	4	GART
2.85394e-210	0.167542	0.81	0.624	5.70789e-207	4	FARSB
9.64505e-210	0.218693	0.681	0.328	1.92901e-206	4	CDC45
1.11499e-209	0.191102	0.776	0.583	2.22998e-206	4	TTLL12
1.42101e-209	0.31699	0.949	0.809	2.84201e-206	4	TXN
6.42342e-209	0.186375	0.776	0.541	1.28468e-205	4	MIS18A
6.73769e-209	0.355412	0.938	0.752	1.34754e-205	4	SUPT16H
2.86634e-208	0.469162	0.99	0.953	5.73269e-205	4	RPLP0
1.80253e-207	0.113481	0.772	0.636	3.60505e-204	4	ST6GALNAC1
8.81755e-207	0.236932	0.781	0.559	1.76351e-203	4	MAD2L1
1.04892e-204	0.361471	0.816	0.648	2.09784e-201	4	ATF5
3.40941e-204	0.213279	0.761	0.586	6.81881e-201	4	TROAP
7.03516e-204	0.268937	0.876	0.677	1.40703e-200	4	PDHA1
2.01866e-203	0.301557	0.732	0.513	4.03733e-200	4	SLC29A1
3.48178e-203	0.197436	0.793	0.57	6.96356e-200	4	NIPSNAP3A
1.07322e-202	0.250312	0.866	0.684	2.14645e-199	4	IPO5
1.62651e-202	0.21245	0.837	0.621	3.25302e-199	4	PAICS
2.71804e-202	0.185972	0.846	0.661	5.43608e-199	4	APEH
2.75575e-202	0.219832	0.801	0.625	5.5115e-199	4	COL18A1
2.66232e-200	0.312085	0.891	0.671	5.32465e-197	4	NDUFB6
8.18826e-200	0.261544	0.801	0.689	1.63765e-196	4	ROGDI
3.25157e-199	0.250554	0.873	0.652	6.50314e-196	4	RCC2
7.20128e-199	0.258313	0.804	0.691	1.44026e-195	4	LRRC75A
4.25586e-197	0.35557	0.95	0.731	8.51173e-194	4	SNRPB
4.83866e-196	0.161106	0.747	0.637	9.67731e-193	4	ATF3
2.82369e-195	0.233525	0.797	0.587	5.64739e-192	4	HACD3
8.18694e-195	0.186968	0.689	0.386	1.63739e-191	4	PAQR9
2.0732e-192	0.375562	0.737	0.587	4.14641e-189	4	HIST1H4H
2.10793e-192	0.262348	0.788	0.584	4.21586e-189	4	TSPAN17
3.96091e-191	1.1886	0.854	0.799	7.92183e-188	4	DDIT4
2.54006e-190	0.286598	0.907	0.708	5.08011e-187	4	LSM4
2.38554e-189	0.210611	0.885	0.658	4.77107e-186	4	UQCRC1
9.83936e-189	0.183825	0.707	0.532	1.96787e-185	4	DSCC1
1.57652e-183	0.258234	0.886	0.715	3.15303e-180	4	HDAC2
1.12729e-180	0.172959	0.844	0.68	2.25458e-177	4	KPNA2
1.48218e-180	0.38517	0.976	0.829	2.96435e-177	4	HNRNPD
1.01049e-178	0.427393	0.919	0.729	2.02097e-175	4	NASP
1.7308e-178	0.212786	0.869	0.679	3.46159e-175	4	MRPL22
1.90203e-176	0.289596	0.831	0.642	3.80406e-173	4	CAPRIN2
3.17994e-176	0.227082	0.911	0.678	6.35988e-173	4	SNRPD1
5.94338e-174	0.271366	0.964	0.827	1.18868e-170	4	HSPD1
8.58154e-174	0.237457	0.723	0.423	1.71631e-170	4	CDH1
2.09909e-173	0.207365	0.816	0.61	4.19818e-170	4	RCL1
8.84454e-172	0.23783	0.72	0.553	1.76891e-168	4	ICAM4
1.41278e-171	0.277566	0.753	0.58	2.82556e-168	4	LXN
1.80517e-171	0.151556	0.714	0.526	3.61034e-168	4	TTK
5.55103e-171	0.308025	0.939	0.779	1.11021e-167	4	YWHAE
9.56412e-171	0.254937	0.869	0.686	1.91282e-167	4	UGGT1
7.35859e-170	0.124232	0.678	0.415	1.47172e-166	4	PKLR
9.67847e-170	0.335429	0.96	0.805	1.93569e-166	4	KPNB1
4.36124e-169	0.152172	0.637	0.409	8.72247e-166	4	PITX1
4.0524e-167	0.294898	0.933	0.771	8.1048e-164	4	LARS
4.72352e-166	0.157476	0.806	0.608	9.44703e-163	4	ACTL6A
6.36509e-166	0.172271	0.852	0.662	1.27302e-162	4	PDZD8
2.02641e-165	0.160438	0.83	0.64	4.05281e-162	4	MTCH2
2.22209e-165	0.241127	0.805	0.567	4.44419e-162	4	KHSRP
7.9861e-165	0.148621	0.788	0.58	1.59722e-161	4	BRI3BP
3.95856e-164	0.208156	0.788	0.645	7.91713e-161	4	MTHFD1
2.79317e-160	0.192091	0.794	0.617	5.58634e-157	4	MGAT4B
3.31085e-160	0.132473	0.652	0.405	6.6217e-157	4	CTDSPL
5.62217e-160	0.221604	0.841	0.665	1.12443e-156	4	PRDX3
8.25967e-160	0.285191	0.918	0.76	1.65193e-156	4	PPIP5K2
5.15815e-159	0.122819	0.673	0.447	1.03163e-155	4	CDC42EP4
5.71229e-158	0.107984	0.832	0.712	1.14246e-154	4	GPSM2
1.25429e-157	0.211811	0.815	0.631	2.50859e-154	4	EEF1E1
2.04703e-157	0.253126	0.924	0.78	4.09406e-154	4	VDAC3
2.16739e-157	0.281336	0.969	0.861	4.33478e-154	4	PA2G4
1.17981e-156	0.178248	0.687	0.491	2.35962e-153	4	POLE2
2.2281e-154	0.186933	0.673	0.509	4.45619e-151	4	HIST1H4F
5.48396e-154	0.119433	0.729	0.575	1.09679e-150	4	NECTIN1
5.74828e-153	0.220252	0.878	0.73	1.14966e-149	4	IMMT
1.85866e-149	0.120934	0.799	0.668	3.71731e-146	4	PRPS2
5.29537e-149	0.244086	0.707	0.566	1.05907e-145	4	C17orf99
1.15382e-147	0.189074	0.747	0.557	2.30764e-144	4	PARVB
2.5286e-147	0.311631	0.961	0.845	5.05721e-144	4	UQCRH
4.85662e-147	0.169191	0.827	0.622	9.71324e-144	4	STOML2
7.07864e-146	0.195742	0.7	0.541	1.41573e-142	4	RFC5
1.40913e-145	0.119489	0.745	0.537	2.81827e-142	4	FAM83A
2.0786e-145	0.188327	0.698	0.528	4.15719e-142	4	NET1
2.11114e-144	0.172655	0.805	0.627	4.22227e-141	4	2021-09-11
7.71394e-144	0.171075	0.801	0.609	1.54279e-140	4	EIF4A3
1.49179e-143	0.254751	0.913	0.696	2.98359e-140	4	SRI
7.58246e-143	0.147572	0.84	0.649	1.51649e-139	4	MRPS9
8.30369e-143	0.169233	0.799	0.619	1.66074e-139	4	MTURN
7.89721e-142	0.10323	0.68	0.546	1.57944e-138	4	ERCC6L
1.76819e-141	0.341551	0.966	0.858	3.53638e-138	4	SLC25A3
4.08778e-141	0.162464	0.673	0.519	8.17556e-138	4	POC1A
5.72747e-141	0.205071	0.867	0.689	1.14549e-137	4	ETFB
5.99982e-140	0.182804	0.876	0.694	1.19996e-136	4	TXN2
1.16508e-139	0.180921	0.842	0.693	2.33016e-136	4	MRPL27
1.27099e-139	0.16452	0.843	0.664	2.54198e-136	4	BCCIP
4.50776e-139	0.267727	0.934	0.779	9.01552e-136	4	SLC25A5
4.92992e-139	0.20845	0.788	0.583	9.85983e-136	4	LMO2
2.37317e-138	0.440653	0.992	0.914	4.74635e-135	4	HSP90AA1
2.00095e-137	0.201615	0.671	0.503	4.00191e-134	4	FN3K
8.43789e-137	0.233415	0.906	0.744	1.68758e-133	4	YWHAQ
3.0555e-136	0.186389	0.826	0.652	6.111e-133	4	PSMD14
8.97999e-136	0.263854	0.74	0.764	1.796e-132	4	HBG1
2.3407e-135	0.137089	0.717	0.644	4.68141e-132	4	CTH
8.49637e-134	0.143497	0.82	0.602	1.69927e-130	4	TPRKB
2.87927e-133	0.140691	0.786	0.65	5.75853e-130	4	WARS
3.01866e-133	0.17374	0.85	0.695	6.03731e-130	4	PLIN2
3.5267e-132	0.145642	0.776	0.676	7.05339e-129	4	SOCS2
2.3524e-131	0.267403	0.979	0.877	4.70479e-128	4	PTGES3
2.64197e-131	0.157523	0.801	0.66	5.28394e-128	4	TTF2
6.50649e-131	0.301634	0.598	0.296	1.3013e-127	4	CA3
9.2797e-130	0.106913	0.82	0.63	1.85594e-126	4	KPNA3
2.44866e-128	0.172232	0.871	0.701	4.89731e-125	4	OLA1
7.33813e-128	0.15871	0.85	0.61	1.46763e-124	4	MRPL1
3.29699e-127	0.154675	0.812	0.674	6.59398e-124	4	MED8
4.26137e-124	0.171284	0.675	0.519	8.52275e-121	4	BCAT1
1.79661e-123	0.217295	0.948	0.811	3.59321e-120	4	EIF5A
4.71991e-123	0.108552	0.774	0.627	9.43982e-120	4	MRPL39
7.0284e-122	0.183353	0.866	0.711	1.40568e-118	4	TCERG1
1.24585e-120	0.230706	0.695	0.555	2.4917e-117	4	SLC43A3
2.65437e-120	0.149061	0.867	0.71	5.30874e-117	4	DDX39A
1.02555e-119	0.166584	0.805	0.666	2.0511e-116	4	GLO1
1.30483e-119	0.106024	0.749	0.619	2.60966e-116	4	BCL7A
6.80258e-118	0.124087	0.861	0.703	1.36052e-114	4	SRRT
1.04656e-117	0.122588	0.707	0.531	2.09311e-114	4	METTL2A
1.08041e-116	0.104768	0.719	0.7	2.16082e-113	4	HBG2
3.9419e-116	0.173294	0.928	0.776	7.8838e-113	4	TCP1
3.43202e-115	0.135293	0.729	0.612	6.86404e-112	4	SREBF1
1.59201e-114	0.20303	0.939	0.787	3.18401e-111	4	ERH
1.76792e-114	0.172607	0.74	0.571	3.53583e-111	4	C20orf27
4.00609e-114	0.123002	0.818	0.676	8.01217e-111	4	SNRNP40
5.64533e-113	0.256532	0.973	0.909	1.12907e-109	4	CHCHD2
2.02544e-112	0.144136	0.775	0.63	4.05087e-109	4	HPRT1
9.56089e-112	0.181574	0.971	0.877	1.91218e-108	4	SERBP1
2.02465e-111	0.163762	0.811	0.699	4.04931e-108	4	LAGE3
3.70137e-109	0.100278	0.616	0.386	7.40275e-106	4	HMGA2
7.20963e-109	0.101506	0.775	0.642	1.44193e-105	4	NIP7
1.13279e-108	0.170504	0.873	0.723	2.26557e-105	4	LSM5
2.15089e-106	0.12892	0.824	0.682	4.30177e-103	4	MRPL14
5.88725e-106	0.159626	0.929	0.737	1.17745e-102	4	CYCS
2.20487e-105	0.15288	0.835	0.671	4.40973e-102	4	MRPS15
8.40351e-105	0.185637	0.713	0.573	1.6807e-101	4	RFC2
2.52924e-104	0.130691	0.786	0.585	5.05848e-101	4	SLIRP
2.75252e-103	0.141722	0.719	0.626	5.50504e-100	4	PPAT
7.4259e-103	0.126559	0.65	0.541	1.48518e-99	4	PPT2
2.85446e-101	0.130528	0.75	0.62	5.70892e-98	4	NUP37
4.86579e-101	0.234948	0.932	0.784	9.73158e-98	4	HSPA9
1.23619e-100	0.132216	0.852	0.706	2.47239e-97	4	HPS4
1.11574e-99	0.137335	0.852	0.716	2.23147e-96	4	ESD
1.64228e-98	0.194168	0.943	0.808	3.28456e-95	4	EIF5B
3.28912e-98	0.145244	0.676	0.448	6.57824e-95	4	TSPAN13
1.23919e-97	0.116249	0.771	0.597	2.47839e-94	4	STK25
1.22426e-96	0.194116	0.91	0.782	2.44852e-93	4	NDUFB9
1.786e-96	0.113005	0.776	0.667	3.572e-93	4	TM7SF3
2.7694e-96	0.16126	0.878	0.753	5.53881e-93	4	ATG3
7.65613e-96	0.171871	0.776	0.644	1.53123e-92	4	NDUFA8
3.77156e-95	0.227269	0.877	0.74	7.54312e-92	4	GADD45GIP1
1.28096e-94	0.146555	0.762	0.657	2.56192e-91	4	MRPL35
3.13492e-94	0.104847	0.807	0.689	6.26985e-91	4	PSMB5
1.14636e-93	0.147113	0.769	0.648	2.29271e-90	4	ARV1
3.66848e-93	0.207274	0.852	0.71	7.33695e-90	4	NDUFC1
6.15234e-93	0.293412	0.782	0.713	1.23047e-89	4	TRIB3
8.69327e-93	0.127825	0.886	0.737	1.73865e-89	4	UQCRFS1
1.48563e-92	0.107413	0.864	0.724	2.97127e-89	4	TRIM28
5.48722e-92	0.149947	0.721	0.606	1.09744e-88	4	RAB13
5.65721e-92	0.105353	0.617	0.499	1.13144e-88	4	GINS1
2.0249e-91	0.110799	0.756	0.633	4.04981e-88	4	MRPL2
2.99837e-91	0.123816	0.876	0.711	5.99673e-88	4	NDUFAB1
6.07467e-91	0.117832	0.833	0.703	1.21493e-87	4	NDUFS3
9.04774e-90	0.153708	0.929	0.782	1.80955e-86	4	SNRPD3
3.67941e-89	0.111839	0.669	0.501	7.35881e-86	4	SCCPDH
4.73558e-89	0.154653	0.737	0.651	9.47117e-86	4	BLVRA
7.13288e-89	0.156118	0.965	0.865	1.42658e-85	4	CALR
1.06082e-88	0.119436	0.813	0.667	2.12164e-85	4	SPTLC2
1.31103e-88	0.138216	0.863	0.719	2.62207e-85	4	MRPL51
1.69131e-88	0.10787	0.848	0.695	3.38261e-85	4	MAT2A
5.80701e-88	0.147413	0.914	0.728	1.1614e-84	4	PSMB3
6.12002e-87	0.140983	0.766	0.63	1.224e-83	4	DDX1
2.45674e-84	0.108392	0.787	0.652	4.91348e-81	4	MRPL13
2.56983e-84	0.219114	0.762	0.659	5.13966e-81	4	DDIT3
3.19524e-84	0.183838	0.827	0.647	6.39049e-81	4	GSTO1
4.12154e-83	0.166902	0.978	0.867	8.24309e-80	4	EIF3A
4.47866e-82	0.169263	0.879	0.703	8.95732e-79	4	UQCRQ
2.66621e-81	0.102596	0.716	0.54	5.33243e-78	4	GGCT
1.62003e-79	0.135735	0.714	0.618	3.24007e-76	4	CRLS1
1.94185e-77	0.186224	0.667	0.632	3.88369e-74	4	NMNAT3
3.5144e-77	0.113667	0.84	0.729	7.02879e-74	4	EIF2S1
4.01326e-75	0.105526	0.881	0.73	8.02651e-72	4	EIF1AX
1.19971e-74	0.140159	0.652	0.564	2.39942e-71	4	PAK1
1.71359e-74	0.207293	0.929	0.802	3.42719e-71	4	ATP5MF
9.78746e-73	0.216319	0.914	0.789	1.95749e-69	4	COX7B
2.08055e-72	0.118442	0.782	0.653	4.16111e-69	4	TIMM8B
1.82666e-70	0.170402	0.961	0.804	3.65331e-67	4	SRSF3
2.43735e-65	0.126886	0.895	0.754	4.87469e-62	4	CCT8
4.65289e-65	0.121142	0.55	0.355	9.30578e-62	4	CTSE
1.38719e-64	0.113515	0.7	0.617	2.77438e-61	4	HPF1
3.26441e-64	0.117877	0.914	0.788	6.52881e-61	4	MAP2K2
2.16292e-52	0.110525	0.571	0.439	4.32584e-49	4	TUBB6
3.2823e-49	0.145481	0.606	0.573	6.5646e-46	4	ZNF620
1.11988e-41	0.200282	0.99	0.947	2.23976e-38	4	RPL4
3.26553e-27	0.201057	0.498	0.393	6.53107e-24	4	LINC01133
1.07507e-22	0.13635	0.99	0.961	2.15014e-19	4	RPL37A
7.57685e-13	0.112907	0.461	0.394	1.51537e-09	4	HBZ
7.53722e-08	0.18866	1	0.992	0.000150744	4	MT-CO3
0	3.22108	0.903	0.486	0	5	IGKC
0	2.73068	0.976	0.57	0	5	IGHM
0	2.50011	1	0.682	0	5	HLA-DRA
0	2.32555	0.999	0.53	0	5	CD79A
0	2.31135	0.998	0.556	0	5	MS4A1
0	2.24505	1	0.744	0	5	CD74
0	2.17035	0.995	0.499	0	5	CD79B
0	2.05651	0.999	0.71	0	5	HLA-DPB1
0	2.01981	0.996	0.428	0	5	BANK1
0	1.89271	0.998	0.664	0	5	HLA-DPA1
0	1.85545	0.995	0.582	0	5	HLA-DQA1
0	1.80034	0.997	0.675	0	5	HLA-DRB5
0	1.75755	0.986	0.57	0	5	RALGPS2
0	1.69128	0.985	0.447	0	5	LINC00926
0	1.6872	0.928	0.394	0	5	IGHD
0	1.6595	0.998	0.68	0	5	LTB
0	1.58134	0.985	0.638	0	5	HLA-DQB1
0	1.39223	0.955	0.514	0	5	MEF2C
0	1.37547	0.927	0.504	0	5	TCL1A
0	1.3449	0.979	0.591	0	5	HLA-DMB
0	1.27877	0.982	0.496	0	5	HLA-DRB1
0	1.23443	0.951	0.299	0	5	VPREB3
0	1.21952	0.963	0.577	0	5	2021-03-01
0	1.20514	0.961	0.444	0	5	AFF3
0	1.11532	0.941	0.614	0	5	HLA-DMA
0	1.06163	0.929	0.423	0	5	CD22
0	1.04449	0.932	0.591	0	5	NCF1
0	1.0172	0.857	0.416	0	5	TNFRSF13C
0	1.00392	0.935	0.393	0	5	SPIB
0	0.965592	0.971	0.709	0	5	BCL11A
0	0.936008	0.91	0.49	0	5	FAM30A
0	0.929279	0.915	0.531	0	5	IRF8
0	0.899714	0.865	0.452	0	5	CD72
0	0.894381	0.93	0.436	0	5	FAM129C
0	0.887049	0.904	0.467	0	5	FCRL1
0	0.869493	0.867	0.259	0	5	PAX5
0	0.868681	0.892	0.113	0	5	LINC02397
0	0.863519	0.91	0.375	0	5	HLA-DQA2
0	0.858265	0.886	0.306	0	5	FCRL5
0	0.854709	0.942	0.627	0	5	CIITA
0	0.848434	0.956	0.571	0	5	CCDC50
0	0.840026	0.899	0.312	0	5	BASP1
0	0.827038	0.841	0.281	0	5	FCRL2
0	0.826346	0.951	0.631	0	5	STRBP
0	0.820789	0.938	0.465	0	5	GAPT
0	0.811793	0.923	0.571	0	5	CTSH
0	0.808158	0.83	0.356	0	5	BLK
0	0.773476	0.894	0.492	0	5	PDLIM1
0	0.760176	0.859	0.334	0	5	CD24
0	0.758884	0.896	0.315	0	5	FCER2
0	0.746012	0.893	0.252	0	5	BLNK
0	0.741736	0.934	0.545	0	5	MARCKS
0	0.710131	1	0.934	0	5	RPL10A
0	0.696482	0.92	0.469	0	5	AIM2
0	0.694969	1	0.973	0	5	RPS8
0	0.67718	0.899	0.212	0	5	POU2AF1
0	0.675821	0.923	0.474	0	5	HHEX
0	0.660048	1	0.945	0	5	RPS5
0	0.651286	0.867	0.537	0	5	SCIMP
0	0.638478	0.959	0.534	0	5	CCR7
0	0.624481	0.86	0.625	0	5	PKIG
0	0.615938	0.889	0.277	0	5	TNFRSF13B
0	0.568168	0.926	0.671	0	5	CD82
0	0.56469	0.821	0.42	0	5	TLR10
0	0.562305	0.912	0.557	0	5	TCF4
0	0.518468	0.871	0.362	0	5	JCHAIN
0	0.502836	0.899	0.435	0	5	TSPAN13
0	0.458053	0.86	0.494	0	5	CDCA7L
0	0.452075	0.961	0.714	0	5	CTSS
0	0.442967	0.764	0.256	0	5	CD1C
0	0.418517	0.847	0.457	0	5	KYNU
0	0.404084	0.931	0.124	0	5	KCNG1
0	0.39412	0.853	0.449	0	5	IGHG4
0	0.389708	0.902	0.577	0	5	RNASE6
0	0.374629	0.845	0.288	0	5	ID3
0	0.350658	0.737	0.079	0	5	LINC01781
0	0.320532	0.853	0.585	0	5	LRRK2
0	0.238858	0.827	0.263	0	5	AL139020.1
0	0.206265	0.906	0.647	0	5	EGR1
0	0.140259	0.896	0.376	0	5	FAM111B
0	0.136543	0.845	0.31	0	5	MYO1E
0	0.125115	0.881	0.516	0	5	CCDC138
0	0.120936	0.907	0.439	0	5	SH3PXD2A
0	0.113186	0.9	0.278	0	5	SLC45A3
8.25278e-308	0.448197	0.841	0.532	1.65056e-304	5	FGD2
3.92549e-305	0.147712	0.742	0.119	7.85098e-302	5	BHLHE41
4.61426e-305	0.133173	0.253	0.014	9.22851e-302	5	IGLC6
6.55685e-304	0.663096	0.789	0.375	1.31137e-300	5	FCRLA
1.78536e-294	0.773525	0.812	0.569	3.57073e-291	5	LY86
2.19625e-290	0.680825	0.954	0.695	4.39249e-287	5	PARP1
3.66065e-283	0.558586	1	0.963	7.3213e-280	5	RPL7A
5.46382e-279	0.50092	0.833	0.565	1.09276e-275	5	PHACTR1
2.58883e-271	0.251689	0.254	0.027	5.17765e-268	5	IGLC7
5.87725e-265	0.555348	1	0.968	1.17545e-261	5	RPS18
3.67841e-263	0.542735	1	0.98	7.35682e-260	5	RPS2
3.81261e-259	0.646398	0.776	0.452	7.62522e-256	5	FCGR2B
1.75964e-255	0.747395	0.758	0.391	3.51928e-252	5	LINC01857
3.77109e-250	0.73893	0.781	0.462	7.54218e-247	5	GNG7
2.5539e-242	2.3332	0.766	0.446	5.1078e-239	5	IGLC2
3.89527e-238	0.120293	0.775	0.396	7.79055e-235	5	IL13RA1
1.46296e-236	0.540183	1	0.969	2.92592e-233	5	RPL3
7.942e-234	0.620002	0.956	0.721	1.5884e-230	5	PLAC8
6.14626e-229	0.382818	0.824	0.593	1.22925e-225	5	CYBB
1.44655e-228	0.571102	1	0.954	2.8931e-225	5	RPL7
8.2155e-225	0.235121	0.791	0.492	1.6431e-221	5	SIGLEC10
6.32106e-217	0.481761	1	0.956	1.26421e-213	5	RPL5
2.69287e-216	0.105451	0.879	0.458	5.38574e-213	5	IFI44L
3.49818e-207	0.486066	1	0.942	6.99636e-204	5	EEF1B2
8.20632e-207	0.435208	1	0.978	1.64126e-203	5	RPS6
5.06238e-204	0.366307	0.87	0.57	1.01248e-200	5	MX1
7.20756e-198	0.486763	0.998	0.931	1.44151e-194	5	RPL23
6.36037e-194	0.593519	0.889	0.725	1.27207e-190	5	SNHG7
1.2878e-191	0.115398	0.916	0.703	2.5756e-188	5	NRIP1
1.49804e-179	0.378121	1	0.961	2.99608e-176	5	RPL37A
8.71237e-178	0.426386	0.889	0.699	1.74247e-174	5	COTL1
2.57024e-177	0.137335	0.79	0.489	5.14048e-174	5	ALCAM
5.25924e-175	0.180147	0.783	0.543	1.05185e-171	5	SPI1
1.30432e-173	0.134442	0.752	0.405	2.60864e-170	5	CXorf21
2.09577e-172	0.212749	0.873	0.679	4.19155e-169	5	AC245060.5
1.60304e-167	0.167913	0.831	0.518	3.20608e-164	5	MCRIP2
1.56377e-162	0.457493	0.701	0.37	3.12755e-159	5	IGHA2
1.52232e-160	0.461353	0.715	0.517	3.04464e-157	5	CLECL1
8.82805e-159	0.114899	0.8	0.53	1.76561e-155	5	HAGHL
5.4679e-157	0.631636	0.706	0.483	1.09358e-153	5	IGHG3
2.02142e-143	0.405865	0.913	0.653	4.04284e-140	5	TAGLN2
1.90958e-140	0.372833	1	0.916	3.81916e-137	5	PTMA
4.38944e-138	0.164116	0.865	0.657	8.77888e-135	5	KCNQ1OT1
5.68208e-138	0.537109	0.688	0.485	1.13642e-134	5	IGHG1
4.7644e-135	0.302817	0.704	0.368	9.52881e-132	5	MZB1
4.48154e-131	0.171267	0.703	0.409	8.96307e-128	5	IRF4
4.17089e-129	0.156851	0.642	0.135	8.34179e-126	5	SSPN
1.31516e-126	0.36127	0.739	0.531	2.63032e-123	5	TLE1
4.23552e-126	0.134692	0.823	0.573	8.47105e-123	5	DCTPP1
1.10185e-123	0.110266	0.775	0.545	2.20369e-120	5	RIPOR1
1.49031e-119	0.454485	0.687	0.348	2.98063e-116	5	IGHA1
1.83066e-119	0.222887	0.885	0.646	3.66132e-116	5	COA1
3.32985e-117	0.362963	0.877	0.655	6.65969e-114	5	CLNS1A
1.61887e-116	0.229383	0.827	0.604	3.23773e-113	5	CARS2
1.05225e-114	0.294528	0.985	0.884	2.1045e-111	5	HSP90AB1
1.86656e-114	0.246676	0.839	0.604	3.73312e-111	5	CDC123
7.05385e-114	0.168474	0.829	0.59	1.41077e-110	5	DMAC1
1.0662e-111	0.106178	0.829	0.594	2.1324e-108	5	UTP14A
2.96842e-111	0.135772	0.875	0.672	5.93684e-108	5	MRPS35
2.29269e-110	0.115517	0.847	0.64	4.58538e-107	5	NIPSNAP1
5.26246e-110	0.113509	0.828	0.611	1.05249e-106	5	LTV1
6.42422e-109	0.242239	0.787	0.602	1.28484e-105	5	MARCKSL1
6.52495e-102	0.180891	0.99	0.876	1.30499e-98	5	NPM1
6.65468e-98	0.136248	0.883	0.669	1.33094e-94	5	RMDN1
2.26102e-95	0.171779	0.847	0.637	4.52204e-92	5	TIMM9
5.25113e-95	0.116776	0.862	0.649	1.05023e-91	5	IMPDH2
2.38116e-91	0.120504	0.846	0.558	4.76231e-88	5	TMA16
2.64593e-89	0.100107	0.872	0.711	5.29185e-86	5	TYW3
2.20144e-88	0.14522	0.63	0.172	4.40288e-85	5	LILRA4
4.00788e-87	0.2584	1	0.964	8.01577e-84	5	RPL14
4.44671e-87	0.359345	0.841	0.711	8.89343e-84	5	LSM7
5.27521e-87	0.203628	0.771	0.624	1.05504e-83	5	METTL21A
9.30447e-87	0.111415	0.783	0.623	1.86089e-83	5	ETV6
1.02172e-86	0.109349	0.731	0.538	2.04344e-83	5	MPZL1
3.15453e-86	0.388876	0.637	0.415	6.30907e-83	5	IGHG2
2.75345e-84	0.212844	0.785	0.637	5.50689e-81	5	NOC3L
8.08957e-84	0.269187	0.901	0.704	1.61791e-80	5	APEX1
5.56893e-82	0.319137	0.926	0.743	1.11379e-78	5	GTF3A
5.63493e-81	0.131901	0.868	0.672	1.12699e-77	5	MRPS25
3.30052e-80	0.334631	0.631	0.328	6.60104e-77	5	EBF1
3.53059e-80	0.194226	0.654	0.301	7.06117e-77	5	HCK
4.90215e-79	0.111315	0.906	0.678	9.80431e-76	5	MRPL22
5.74881e-79	0.271418	0.999	0.946	1.14976e-75	5	RPL4
4.56137e-78	0.151027	0.723	0.585	9.12274e-75	5	CBFA2T3
6.93224e-77	0.274912	0.689	0.57	1.38645e-73	5	ITM2C
6.70652e-76	0.278041	0.919	0.802	1.3413e-72	5	HMGN1
1.14263e-74	0.317655	0.689	0.529	2.28526e-71	5	NCF4
4.2115e-74	0.25061	0.984	0.873	8.42301e-71	5	HNRNPA1
6.92293e-74	0.227736	0.642	0.282	1.38459e-70	5	PLD4
3.38013e-73	0.30815	0.792	0.653	6.76025e-70	5	RPL22L1
1.49816e-71	0.328406	0.745	0.552	2.99631e-68	5	SPINT2
3.2603e-71	0.185498	0.834	0.679	6.5206e-68	5	EIF6
1.86835e-69	0.422829	0.643	0.523	3.7367e-66	5	PCDH9
3.86495e-69	0.115792	0.864	0.666	7.72989e-66	5	SDHD
9.34369e-69	0.118606	0.847	0.66	1.86874e-65	5	SNRPA
6.86828e-68	0.170666	0.814	0.608	1.37366e-64	5	ECHS1
2.13046e-67	0.119912	0.818	0.575	4.26091e-64	5	MRPS6
2.24057e-66	0.122369	0.858	0.637	4.48114e-63	5	PHB
7.76342e-64	0.404029	0.673	0.587	1.55268e-60	5	TTN
1.28087e-63	0.246041	0.848	0.673	2.56175e-60	5	PEBP1
3.58322e-63	0.165929	0.595	0.212	7.16644e-60	5	KLK1
1.61079e-62	0.10743	0.858	0.668	3.22158e-59	5	MRPL21
2.62793e-62	0.192219	0.827	0.614	5.25587e-59	5	MRPL1
1.86985e-61	0.105715	0.903	0.747	3.7397e-58	5	LRPPRC
2.2748e-61	0.129579	0.754	0.584	4.54961e-58	5	BRI3BP
1.32867e-60	0.285001	0.827	0.696	2.65734e-57	5	SELENOH
7.26584e-60	0.172171	0.938	0.765	1.45317e-56	5	CCT4
1.50508e-58	0.203447	0.857	0.707	3.01016e-55	5	LSM2
1.69124e-56	0.24623	0.886	0.755	3.38249e-53	5	FBL
2.08198e-56	0.1719	0.86	0.691	4.16396e-53	5	ETFB
2.24524e-55	0.281704	0.871	0.767	4.49048e-52	5	SRSF9
2.30762e-53	0.134958	1	0.975	4.61525e-50	5	MT-ATP6
2.91825e-53	0.124396	1	0.969	5.83649e-50	5	MT-CO2
7.41385e-53	0.229356	0.977	0.877	1.48277e-49	5	PPIA
1.18143e-52	0.183506	0.732	0.589	2.36286e-49	5	VPS37B
1.53909e-50	0.197007	0.975	0.835	3.07819e-47	5	HIST1H1D
1.88043e-50	0.167383	0.78	0.59	3.76087e-47	5	MRPS26
3.12018e-49	0.120137	0.78	0.7	6.24036e-46	5	NPC2
5.07764e-48	0.114778	0.404	0.634	1.01553e-44	5	AREG
9.85178e-45	0.150442	0.669	0.494	1.97036e-41	5	CAPG
2.05038e-44	0.122484	0.745	0.623	4.10076e-41	5	UGCG
4.00737e-44	0.181127	0.942	0.844	8.01474e-41	5	PNN
7.31909e-42	0.19977	0.644	0.627	1.46382e-38	5	MPEG1
5.11162e-41	0.15971	0.879	0.747	1.02232e-37	5	CHD4
2.7074e-39	0.141359	0.992	0.878	5.41479e-36	5	NCL
4.16738e-39	0.178805	0.78	0.646	8.33475e-36	5	PRMT1
5.68577e-38	0.119331	0.884	0.731	1.13715e-34	5	CCT7
1.28442e-37	0.228643	0.711	0.556	2.56883e-34	5	MIF
1.87332e-37	0.214488	0.674	0.582	3.74663e-34	5	AGPAT5
9.18756e-37	0.249758	0.785	0.684	1.83751e-33	5	RPS17
5.7912e-36	0.150121	0.902	0.793	1.15824e-32	5	RSL1D1
1.80227e-35	0.106878	0.577	0.398	3.60455e-32	5	CD70
7.12483e-34	0.190599	0.838	0.811	1.42497e-30	5	DDX21
6.54986e-33	0.120335	0.999	0.953	1.30997e-29	5	RPLP0
6.52518e-32	0.213806	0.83	0.772	1.30504e-28	5	SNU13
1.64362e-31	0.145405	0.63	0.422	3.28725e-28	5	OAS1
5.25973e-31	0.184015	0.887	0.79	1.05195e-27	5	HNRNPM
7.6661e-30	0.18771	0.83	0.754	1.53322e-26	5	PHB2
2.56005e-29	0.166369	0.828	0.724	5.12009e-26	5	SMARCC1
3.12027e-28	0.149885	0.774	0.653	6.24053e-25	5	DNAJC19
7.64556e-28	0.111944	0.885	0.747	1.52911e-24	5	YWHAQ
7.93465e-27	0.110269	0.883	0.737	1.58693e-23	5	SNRPB
1.98659e-25	0.125952	0.94	0.833	3.97319e-22	5	HNRNPD
3.55382e-25	0.114521	0.865	0.74	7.10763e-22	5	UQCRFS1
1.37374e-24	0.103176	0.774	0.7	2.74749e-21	5	ATP5MC1
1.50845e-23	0.232672	0.65	0.576	3.0169e-20	5	SCPEP1
2.54011e-22	0.11893	0.548	0.232	5.08021e-19	5	PEG10
3.90058e-22	0.133909	0.886	0.791	7.80116e-19	5	ATP5PF
6.90026e-22	0.141541	0.8	0.733	1.38005e-18	5	PDCD4
4.50991e-21	0.119866	0.824	0.75	9.01983e-18	5	HSPE1
8.55414e-21	0.166181	0.794	0.721	1.71083e-17	5	AMD1
7.08868e-19	0.203667	0.718	0.672	1.41774e-15	5	GLO1
8.42212e-19	0.356035	0.547	0.335	1.68442e-15	5	PPP1R14A
3.59565e-17	0.218278	0.657	0.588	7.19131e-14	5	ATF7IP2
4.72973e-17	0.144652	0.605	0.595	9.45946e-14	5	TFEC
9.19568e-17	1.44734	0.549	0.491	1.83914e-13	5	IGLC3
3.08992e-16	0.114443	0.775	0.693	6.17985e-13	5	NAA38
1.26742e-15	0.170816	0.661	0.601	2.53485e-12	5	FAM162A
1.75086e-15	0.126586	0.708	0.648	3.50173e-12	5	PHF6
1.43313e-12	0.356496	0.602	0.629	2.86626e-09	5	BCL7A
1.44803e-12	0.128213	0.706	0.618	2.89606e-09	5	BUD23
5.9849e-10	0.312204	0.515	0.242	1.19698e-06	5	CPNE5
4.03171e-09	0.121837	0.73	0.679	8.06342e-06	5	NOP58
1.47663e-08	0.116744	0.509	0.219	2.95327e-05	5	DNAJC5B
7.68838e-07	0.177566	0.502	0.625	0.00153768	5	PMAIP1
2.34793e-06	0.115914	0.677	0.667	0.00469587	5	DARS
7.08518e-06	0.118411	0.717	0.684	0.0141704	5	MRPL52
1.58367e-05	0.100191	0.5	0.294	0.0316734	5	NR4A1
0	3.90103	0.979	0.546	0	6	S100A8
0	3.82244	0.979	0.557	0	6	S100A9
0	3.47848	0.993	0.55	0	6	LYZ
0	3.14453	0.983	0.595	0	6	VCAN
0	3.03669	0.996	0.622	0	6	FOS
0	2.8315	0.991	0.548	0	6	FCN1
0	2.7219	0.993	0.604	0	6	CST3
0	2.66866	0.992	0.527	0	6	MNDA
0	2.61221	0.998	0.714	0	6	CTSS
0	2.20741	0.988	0.601	0	6	AIF1
0	2.18756	0.989	0.597	0	6	LST1
0	2.05269	0.996	0.859	0	6	SAT1
0	1.99594	0.996	0.678	0	6	S100A11
0	1.96804	0.987	0.586	0	6	CYBB
0	1.95284	0.976	0.513	0	6	FGL2
0	1.86754	0.977	0.473	0	6	TYMP
0	1.8537	0.998	0.762	0	6	S100A4
0	1.83152	0.999	0.828	0	6	S100A6
0	1.77704	0.995	0.625	0	6	TYROBP
0	1.77023	0.981	0.593	0	6	TNFAIP2
0	1.7134	0.982	0.676	0	6	LGALS1
0	1.67191	0.984	0.695	0	6	COTL1
0	1.65538	0.987	0.636	0	6	FCER1G
0	1.62243	0.93	0.563	0	6	CD14
0	1.61734	0.957	0.636	0	6	IGSF6
0	1.60337	0.958	0.586	0	6	CSTA
0	1.58974	0.966	0.535	0	6	SPI1
0	1.57782	0.962	0.558	0	6	CSF3R
0	1.54523	0.995	0.748	0	6	VIM
0	1.53996	0.939	0.617	0	6	DUSP6
0	1.53754	0.962	0.609	0	6	CEBPD
0	1.50228	0.963	0.571	0	6	AP1S2
0	1.48955	0.985	0.801	0	6	S100A10
0	1.48156	0.966	0.569	0	6	CLEC7A
0	1.48143	0.853	0.29	0	6	S100A12
0	1.44912	0.926	0.498	0	6	MS4A6A
0	1.44898	0.943	0.442	0	6	SERPINA1
0	1.4174	0.946	0.637	0	6	GRN
0	1.40717	0.936	0.464	0	6	NCF2
0	1.38882	0.949	0.532	0	6	DMXL2
0	1.35663	0.946	0.582	0	6	LRRK2
0	1.35089	0.907	0.517	0	6	CFD
0	1.34832	0.956	0.676	0	6	ANXA5
0	1.34224	0.918	0.647	0	6	IFI30
0	1.33199	0.916	0.299	0	6	MS4A7
0	1.32776	0.979	0.678	0	6	SAMHD1
0	1.32592	0.945	0.546	0	6	SLC11A1
0	1.3178	0.967	0.687	0	6	HLA-DRA
0	1.31349	0.967	0.69	0	6	NPC2
0	1.30943	0.917	0.508	0	6	CPVL
0	1.2924	0.953	0.619	0	6	JAML
0	1.28596	0.927	0.573	0	6	IFITM3
0	1.26467	0.904	0.471	0	6	MAFB
0	1.25057	0.958	0.646	0	6	CCDC88A
0	1.24825	0.97	0.743	0	6	TKT
0	1.24722	0.905	0.522	0	6	RGS2
0	1.23877	0.923	0.568	0	6	CFP
0	1.2276	0.991	0.747	0	6	CD74
0	1.20917	0.906	0.422	0	6	CLEC12A
0	1.20308	0.943	0.658	0	6	ANXA2
0	1.19941	0.905	0.446	0	6	LILRB2
0	1.19839	0.914	0.613	0	6	MPEG1
0	1.18458	0.92	0.5	0	6	KCTD12
0	1.17068	0.903	0.543	0	6	RHOB
0	1.16676	0.961	0.693	0	6	C1orf162
0	1.16081	0.919	0.507	0	6	CD68
0	1.14909	0.913	0.541	0	6	RETN
0	1.11565	0.914	0.549	0	6	MARCKS
0	1.09195	0.888	0.536	0	6	AC020656.1
0	1.086	0.922	0.608	0	6	TIMP1
0	1.07103	0.927	0.594	0	6	NCF1
0	1.058	0.943	0.576	0	6	TFEC
0	1.05585	0.877	0.424	0	6	PLBD1
0	1.05523	0.923	0.608	0	6	LRP1
0	1.04857	0.919	0.648	0	6	EGR1
0	1.04461	0.924	0.667	0	6	TMEM176B
0	1.0246	0.999	0.982	0	6	MT-ND1
0	1.02326	0.906	0.569	0	6	FCGRT
0	1.0198	0.944	0.581	0	6	2021-03-01
0	1.00315	0.902	0.605	0	6	LILRB3
0	0.996337	0.926	0.593	0	6	PLXDC2
0	0.986966	0.887	0.644	0	6	NAMPT
0	0.983478	0.911	0.29	0	6	HCK
0	0.975925	0.874	0.495	0	6	CD300E
0	0.972809	0.887	0.587	0	6	TNFSF13B
0	0.97065	0.903	0.576	0	6	CTSH
0	0.966973	0.914	0.67	0	6	TMEM176A
0	0.951065	0.86	0.528	0	6	PLAUR
0	0.94878	0.954	0.723	0	6	CD36
0	0.935118	0.892	0.489	0	6	CD302
0	0.921356	0.88	0.483	0	6	SLC8A1
0	0.904565	0.895	0.596	0	6	RNF130
0	0.900057	0.851	0.347	0	6	P2RY13
0	0.890593	0.859	0.601	0	6	FOSB
0	0.855741	0.993	0.899	0	6	GAPDH
0	0.834201	0.876	0.511	0	6	ALDH2
0	0.833356	0.854	0.488	0	6	PRAM1
0	0.825125	0.885	0.412	0	6	TGFBI
0	0.812694	0.931	0.644	0	6	GLRX
0	0.810942	1	0.992	0	6	MT-CO3
0	0.806689	0.875	0.425	0	6	PILRA
0	0.805309	0.891	0.484	0	6	SULF2
0	0.790361	0.852	0.435	0	6	TIMP2
0	0.787742	0.856	0.497	0	6	PECAM1
0	0.787682	0.86	0.319	0	6	TLR2
0	0.787362	0.827	0.248	0	6	CSF1R
0	0.784629	0.825	0.253	0	6	SMIM25
0	0.776524	0.852	0.46	0	6	C19orf38
0	0.763436	0.952	0.785	0	6	H2AFY
0	0.741141	0.824	0.38	0	6	LRRC25
0	0.74081	0.847	0.461	0	6	RBM47
0	0.740446	0.845	0.486	0	6	CAPG
0	0.727173	0.999	0.987	0	6	MT-ND5
0	0.724805	0.999	0.993	0	6	MT-ND4
0	0.721733	0.819	0.421	0	6	RGS18
0	0.72166	0.863	0.43	0	6	IER3
0	0.708574	0.82	0.487	0	6	SHTN1
0	0.70206	0.849	0.49	0	6	TCF7L2
0	0.689529	0.854	0.533	0	6	FGD2
0	0.676689	0.863	0.565	0	6	SCPEP1
0	0.663072	0.813	0.537	0	6	CD33
0	0.658292	0.831	0.399	0	6	ASGR1
0	0.656588	0.805	0.464	0	6	SLC7A7
0	0.645267	0.822	0.18	0	6	CD86
0	0.637842	0.897	0.521	0	6	MEF2C
0	0.618312	0.789	0.336	0	6	CSF2RA
0	0.612968	0.818	0.466	0	6	ZNF385A
0	0.607922	0.851	0.541	0	6	SCIMP
0	0.595454	0.782	0.353	0	6	LILRA5
0	0.593835	0.784	0.202	0	6	CD163
0	0.564954	0.787	0.397	0	6	CD1D
0	0.550979	0.765	0.37	0	6	FPR1
0	0.549153	0.782	0.382	0	6	PTAFR
0	0.545162	0.823	0.567	0	6	PYGL
0	0.542943	0.84	0.412	0	6	OAS1
0	0.54257	0.86	0.413	0	6	ALDH1A1
0	0.521063	0.796	0.437	0	6	CLEC4A
0	0.491873	0.779	0.471	0	6	PTGIR
0	0.46206	0.734	0.178	0	6	LGALS2
0	0.439936	0.754	0.252	0	6	HNMT
0	0.40963	0.766	0.317	0	6	F13A1
0	0.388468	0.795	0.219	0	6	GPBAR1
0	0.342156	0.73	0.243	0	6	CLEC4E
0	0.246861	0.73	0.25	0	6	RTN1
0	0.213372	0.687	0.136	0	6	RBP7
0	0.166808	0.654	0.109	0	6	TPPP3
0	0.115255	0.711	0.18	0	6	AC084871.2
5.75336e-303	0.502058	0.79	0.466	1.15067e-299	6	AHR
1.33969e-295	0.62864	0.785	0.441	2.67939e-292	6	LPCAT2
7.72089e-292	0.699697	0.773	0.414	1.54418e-288	6	KLF4
1.65683e-290	1.06373	0.918	0.682	3.31366e-287	6	HLA-DRB5
4.3179e-287	0.582146	0.863	0.634	8.63579e-284	6	CIITA
4.05716e-286	0.758936	0.908	0.666	8.11433e-283	6	PKM
1.06756e-285	0.686182	1	0.985	2.13511e-282	6	MT-CYB
1.52155e-284	0.485442	0.751	0.297	3.04311e-281	6	JDP2
1.36761e-282	0.671722	0.997	0.97	2.73523e-279	6	MT-CO2
9.80419e-278	0.639234	0.755	0.457	1.96084e-274	6	CYP1B1
1.32731e-271	0.246342	0.789	0.449	2.65461e-268	6	CLEC11A
4.63632e-271	0.205589	0.727	0.323	9.27264e-268	6	CD9
1.87733e-267	0.368228	0.68	0.08	3.75466e-264	6	PID1
3.86175e-266	0.456101	0.729	0.307	7.7235e-263	6	CDA
8.65792e-265	0.496402	0.787	0.486	1.73158e-261	6	MGST1
4.83557e-263	0.465852	0.68	0.116	9.67115e-260	6	MYOF
2.76828e-262	0.65715	0.818	0.528	5.53657e-259	6	SOX4
7.18546e-261	0.35127	0.807	0.552	1.43709e-257	6	KIF13A
2.97283e-260	0.119554	0.652	0.125	5.94565e-257	6	AC026369.3
8.09745e-260	0.199371	0.665	0.168	1.61949e-256	6	MARCO
7.54535e-258	0.518694	0.79	0.463	1.50907e-254	6	KYNU
1.73982e-249	0.597312	0.999	0.975	3.47964e-246	6	MT-ATP6
1.55957e-245	0.112806	0.55	0.029	3.11914e-242	6	SERPINB2
2.18088e-243	0.347319	0.703	0.222	4.36176e-240	6	LILRB4
2.49856e-243	0.541944	0.805	0.465	4.99713e-240	6	IFI44L
2.14229e-236	0.33016	0.741	0.532	4.28458e-233	6	PDK4
1.27525e-234	0.42058	0.8	0.485	2.5505e-231	6	HHEX
3.95378e-234	0.526293	0.733	0.345	7.90757e-231	6	NRGN
1.30205e-233	0.555647	0.844	0.606	2.60411e-230	6	GNAQ
3.57847e-233	0.447004	0.735	0.337	7.15694e-230	6	CEBPA
1.81523e-232	0.617756	0.92	0.718	3.63047e-229	6	SERPINB1
2.47199e-231	0.515309	0.834	0.665	4.94399e-228	6	HSPA1A
5.67544e-230	0.656117	0.896	0.757	1.13509e-226	6	RNH1
8.95811e-229	0.597524	0.791	0.558	1.79162e-225	6	PAK1
1.02042e-228	0.544879	0.793	0.579	2.04084e-225	6	DPYSL2
2.2123e-227	0.693789	0.809	0.651	4.4246e-224	6	WARS
1.2285e-225	0.64689	0.802	0.551	2.45701e-222	6	ITGAX
2.44921e-212	0.689379	0.841	0.623	4.89841e-209	6	HLA-DMA
6.77497e-211	0.274828	0.743	0.506	1.35499e-207	6	C3AR1
3.74154e-209	0.321637	0.784	0.583	7.48308e-206	6	CBFA2T3
1.97417e-208	0.601368	0.867	0.7	3.94833e-205	6	FKBP1A
4.71062e-208	0.311207	0.671	0.231	9.42124e-205	6	ABCC3
4.78086e-208	0.394446	0.697	0.372	9.56171e-205	6	C5AR1
6.44654e-208	1.10513	0.896	0.673	1.28931e-204	6	HLA-DPA1
5.38842e-207	0.337913	0.749	0.497	1.07768e-203	6	SIGLEC10
1.11453e-199	0.70319	0.919	0.77	2.22905e-196	6	GSTP1
5.68737e-198	0.638329	0.811	0.604	1.13747e-194	6	HLA-DMB
9.69756e-191	0.343733	0.788	0.574	1.93951e-187	6	IFIT3
2.27594e-189	0.356525	0.768	0.479	4.55188e-186	6	GAPT
2.64356e-188	0.477337	0.707	0.415	5.28712e-185	6	RAB32
3.26848e-187	0.692456	0.684	0.364	6.53697e-184	6	APOBEC3A
4.90436e-181	0.476076	0.758	0.588	9.80873e-178	6	RNASE6
2.77778e-179	0.345983	0.686	0.384	5.55556e-176	6	RNF144B
4.26809e-178	0.447773	0.709	0.443	8.53618e-175	6	CES1
1.00984e-177	0.350121	0.758	0.514	2.01967e-174	6	MGST2
3.13099e-171	0.359877	0.798	0.564	6.26197e-168	6	FAM45A
4.2202e-169	0.507471	0.86	0.622	8.4404e-166	6	ISG15
2.84881e-166	0.487331	0.74	0.549	5.69761e-163	6	ETS2
2.09051e-164	0.191782	0.451	0.07	4.18103e-161	6	C1QB
3.77608e-164	0.422524	0.718	0.521	7.55216e-161	6	KCNK6
1.87111e-163	0.894046	0.895	0.718	3.74223e-160	6	HLA-DPB1
4.46861e-162	0.442968	0.812	0.585	8.93723e-159	6	LMO2
1.55964e-161	0.473251	0.891	0.656	3.11927e-158	6	TAGLN2
1.90265e-161	0.368737	0.66	0.319	3.8053e-158	6	LILRA1
2.96629e-159	0.198265	0.733	0.512	5.93257e-156	6	APOE
2.06729e-156	0.339601	0.803	0.581	4.13459e-153	6	ATOX1
2.4565e-154	0.42436	0.909	0.732	4.913e-151	6	PSMB3
3.83956e-154	0.478077	0.801	0.576	7.67913e-151	6	MX1
7.2361e-154	0.437008	0.906	0.762	1.44722e-150	6	PSMA4
4.22183e-153	0.52542	0.727	0.447	8.44365e-150	6	BCL2A1
5.14946e-152	0.749908	0.784	0.511	1.02989e-148	6	HLA-DRB1
1.3307e-150	0.404268	0.731	0.528	2.6614e-147	6	NCF4
1.49812e-150	0.30526	0.628	0.222	2.99625e-147	6	ACPP
3.70673e-149	0.656865	0.89	0.722	7.41345e-146	6	MT2A
3.82421e-148	0.506821	0.648	0.287	7.64843e-145	6	NR4A1
5.31893e-146	0.460008	0.68	0.446	1.06379e-142	6	RAB31
1.33114e-145	0.389875	0.773	0.625	2.66228e-142	6	ETV6
2.40433e-144	0.526904	0.903	0.786	4.80867e-141	6	PRELID1
1.97628e-143	0.655473	0.808	0.651	3.95255e-140	6	HLA-DQB1
5.18254e-138	0.31637	0.905	0.661	1.03651e-134	6	PLEK
2.21027e-136	0.371624	0.726	0.573	4.42053e-133	6	PHACTR1
6.77256e-136	0.457617	0.678	0.464	1.35451e-132	6	HMOX1
3.09572e-132	0.227964	0.669	0.412	6.19143e-129	6	CXorf21
8.107e-130	0.232334	0.733	0.501	1.6214e-126	6	FABP5
1.07017e-129	0.355217	0.771	0.659	2.14035e-126	6	SCARB2
1.13191e-128	0.271505	0.609	0.192	2.26381e-125	6	MS4A4A
1.24307e-128	0.398697	0.843	0.65	2.48614e-125	6	GSTO1
4.63092e-128	0.484679	0.781	0.579	9.26183e-125	6	IFI6
4.29618e-126	0.413204	0.765	0.593	8.59237e-123	6	LAP3
5.88552e-124	0.44067	0.621	0.301	1.1771e-120	6	SLC24A4
9.86577e-122	0.40187	0.756	0.609	1.97315e-118	6	BID
1.90694e-120	0.341759	0.74	0.615	3.81389e-117	6	FRAT2
6.08562e-120	0.332043	0.924	0.754	1.21712e-116	6	ENO1
8.82031e-120	0.358176	0.999	0.972	1.76406e-116	6	FTH1
9.36517e-114	0.300801	0.692	0.512	1.87303e-110	6	ACTN1
4.40565e-113	0.35615	0.879	0.778	8.8113e-110	6	CLTA
9.04593e-113	0.387419	0.952	0.859	1.80919e-109	6	SFPQ
5.05524e-109	0.188218	0.605	0.292	1.01105e-105	6	STEAP4
7.84213e-107	0.17228	0.673	0.453	1.56843e-103	6	APP
5.57802e-105	0.306098	0.894	0.774	1.1156e-101	6	NOP10
6.52891e-104	0.280511	0.775	0.653	1.30578e-100	6	RREB1
6.0361e-103	0.263268	0.78	0.63	1.20722e-99	6	EIF4EBP1
9.23007e-102	0.252054	0.75	0.61	1.84601e-98	6	PMAIP1
6.24175e-101	0.15404	0.808	0.635	1.24835e-97	6	KPNA3
3.53482e-98	0.509097	0.64	0.407	7.06964e-95	6	IL13RA1
1.07117e-97	0.328276	0.897	0.808	2.14234e-94	6	DDX21
3.21118e-97	0.382848	0.798	0.701	6.42236e-94	6	MAT2A
1.85164e-95	0.324932	0.893	0.795	3.70328e-92	6	DNAJA1
4.97048e-93	0.166829	0.64	0.413	9.94097e-90	6	GNA15
1.45799e-92	0.129104	0.578	0.27	2.91599e-89	6	CXCL2
8.18316e-91	0.161163	0.579	0.233	1.63663e-87	6	CACNA2D3
4.84375e-89	0.288746	0.737	0.64	9.6875e-86	6	IFIT2
1.36738e-88	0.115037	0.572	0.229	2.73475e-85	6	HGF
2.81904e-88	0.227471	0.843	0.719	5.63807e-85	6	ESD
3.51805e-86	0.174674	0.733	0.634	7.03609e-83	6	PISD
4.35978e-86	0.105057	0.67	0.543	8.71956e-83	6	NREP
5.2553e-86	0.283207	0.742	0.611	1.05106e-82	6	CARS2
4.06968e-85	0.274529	0.938	0.871	8.13936e-82	6	EIF3A
4.64027e-85	0.335126	0.686	0.621	9.28054e-82	6	PGD
9.86618e-85	0.231113	0.761	0.637	1.97324e-81	6	TXNDC17
1.03535e-83	0.209128	0.715	0.585	2.0707e-80	6	PPIF
1.81522e-83	0.243079	0.632	0.507	3.63044e-80	6	FAM129B
4.17607e-82	0.179962	0.624	0.55	8.35214e-79	6	CDH23
1.98208e-80	0.238762	0.792	0.6	3.96416e-77	6	MINOS1
2.14617e-80	0.336158	0.739	0.666	4.29234e-77	6	KCNQ1OT1
3.56295e-80	0.277559	0.883	0.795	7.12589e-77	6	RSL1D1
1.46779e-78	0.361372	0.559	0.203	2.93557e-75	6	CLEC10A
5.74154e-78	0.280632	0.905	0.777	1.14831e-74	6	ATP5ME
1.584e-77	0.233162	0.768	0.618	3.168e-74	6	PGAM1
3.44762e-77	0.275558	0.892	0.749	6.89524e-74	6	ANP32A
4.16553e-76	0.124201	0.61	0.327	8.33106e-73	6	MYO1E
1.19268e-74	0.225041	0.862	0.707	2.38537e-71	6	UQCRQ
5.96238e-74	0.282108	0.998	0.916	1.19248e-70	6	PTMA
1.56322e-73	0.247561	0.785	0.686	3.12645e-70	6	FKBP5
1.64048e-71	0.143405	0.734	0.607	3.28096e-68	6	RAB13
6.13929e-71	0.289351	0.813	0.759	1.22786e-67	6	ATG3
3.51424e-70	0.186707	0.538	0.206	7.02848e-67	6	G0S2
1.62607e-69	0.166956	0.736	0.625	3.25214e-66	6	MTX1
3.14431e-69	0.238568	0.664	0.583	6.28862e-66	6	GSN
4.86353e-67	0.295052	0.745	0.673	9.72706e-64	6	SPTLC2
5.18053e-66	0.227084	0.588	0.394	1.03611e-62	6	CD93
3.52452e-64	0.266905	0.718	0.654	7.04904e-61	6	BLVRA
6.17704e-64	0.208322	0.658	0.497	1.23541e-60	6	MT1X
6.39152e-64	0.260508	0.635	0.58	1.2783e-60	6	LY86
3.75574e-63	0.227129	0.856	0.733	7.51148e-60	6	SYNCRIP
4.39555e-63	0.135612	0.553	0.284	8.79111e-60	6	PTGS2
5.25009e-63	0.15245	0.769	0.707	1.05002e-59	6	CREG1
1.94373e-62	0.145986	0.694	0.597	3.88746e-59	6	CBR1
7.96594e-62	0.22555	0.843	0.757	1.59319e-58	6	CANX
3.90113e-61	0.266569	0.837	0.747	7.80226e-58	6	ATP5F1C
2.05201e-59	0.179336	0.571	0.271	4.10402e-56	6	CD1C
3.26386e-58	0.162522	0.659	0.526	6.52772e-55	6	IRF7
1.37495e-57	0.15046	0.537	0.263	2.74989e-54	6	HBEGF
2.93575e-57	0.181814	0.836	0.769	5.8715e-54	6	COX5A
2.23398e-56	0.115534	0.664	0.523	4.46795e-53	6	PCBD1
7.72612e-55	0.224705	0.867	0.793	1.54522e-51	6	PRDX1
1.70692e-53	0.179938	0.667	0.584	3.41384e-50	6	CCDC112
3.71035e-53	0.146217	0.873	0.711	7.42071e-50	6	LSM7
3.94592e-53	0.213268	0.664	0.619	7.89184e-50	6	SLFN11
1.16675e-52	0.209932	0.633	0.473	2.33351e-49	6	IL18
3.14446e-52	0.199705	0.795	0.692	6.28893e-49	6	NAA38
3.15791e-51	0.134171	0.771	0.678	6.31583e-48	6	RMDN1
8.91143e-51	0.215669	0.599	0.539	1.78229e-47	6	CSF2RB
1.4145e-50	0.13422	0.707	0.603	2.82899e-47	6	COA6
3.37891e-49	0.233471	0.734	0.715	6.75782e-46	6	NRIP1
1.99678e-47	0.62818	0.682	0.603	3.99356e-44	6	HLA-DQA1
3.20307e-47	0.131212	0.896	0.779	6.40615e-44	6	MT-ND6
4.66181e-47	0.317188	0.564	0.399	9.32361e-44	6	IL1B
5.18194e-46	0.202928	0.875	0.794	1.03639e-42	6	COX7B
2.22406e-45	0.163059	0.826	0.704	4.44811e-42	6	TPI1
5.02549e-45	0.177133	0.611	0.508	1.0051e-41	6	MSRB2
8.69428e-45	0.24464	0.75	0.676	1.73886e-41	6	PGK1
1.53996e-44	0.160831	0.741	0.657	3.07993e-41	6	TIMM8B
5.27803e-43	0.284184	0.53	0.248	1.05561e-39	6	RNASE2
5.77681e-43	0.18644	0.531	0.262	1.15536e-39	6	IL1RN
6.60946e-42	0.218468	0.688	0.631	1.32189e-38	6	SLC12A6
1.79197e-40	0.582038	0.531	0.369	3.58394e-37	6	CDKN1C
3.54681e-40	0.169957	0.758	0.692	7.09362e-37	6	SMARCA4
1.78002e-39	0.129582	0.729	0.633	3.56005e-36	6	ADI1
1.88902e-38	0.169877	0.882	0.806	3.77804e-35	6	ATP5MF
2.58031e-38	0.154183	0.8	0.68	5.16061e-35	6	LDHA
2.95259e-38	0.192183	0.697	0.631	5.90517e-35	6	RUNX1
4.96723e-38	0.424373	0.546	0.458	9.93446e-35	6	CXCL8
2.26437e-37	0.129224	0.925	0.859	4.52874e-34	6	DYNLL1
3.12662e-37	0.13781	0.811	0.698	6.25324e-34	6	SELENOH
3.19632e-37	0.149018	0.828	0.751	6.39264e-34	6	CHD4
6.17623e-37	0.101991	0.954	0.844	1.23525e-33	6	PNN
6.84359e-37	0.223492	0.64	0.589	1.36872e-33	6	CHML
1.01726e-36	0.167071	0.614	0.578	2.03452e-33	6	IFIT1
6.67146e-36	0.202603	0.65	0.579	1.33429e-32	6	C20orf27
8.01398e-35	0.210479	0.698	0.672	1.6028e-31	6	UQCRC1
2.39595e-34	0.1687	0.717	0.665	4.7919e-31	6	RCC2
1.56912e-33	0.115712	0.47	0.062	3.13825e-30	6	NRG1
1.064e-31	0.14115	0.502	0.194	2.128e-28	6	AL138899.1
1.11449e-31	0.142086	0.979	0.932	2.22898e-28	6	RPL23
7.65322e-31	0.191566	0.792	0.754	1.53064e-27	6	PPA1
1.39247e-30	0.111576	0.58	0.554	2.78495e-27	6	SLC19A1
1.97252e-30	0.111791	0.709	0.633	3.94505e-27	6	HSD17B10
3.13549e-30	0.105998	0.913	0.835	6.27098e-27	6	HNRNPD
9.80386e-30	0.172453	0.614	0.554	1.96077e-26	6	PLIN3
7.91361e-28	0.197493	0.521	0.38	1.58272e-24	6	C1QA
1.06883e-27	0.16421	0.519	0.367	2.13766e-24	6	CXCL16
1.07467e-27	0.142439	0.728	0.684	2.14934e-24	6	MRPL52
1.11466e-27	0.242527	0.537	0.391	2.22932e-24	6	FBP1
1.65289e-27	0.102361	0.575	0.488	3.30577e-24	6	ATP8B4
2.39029e-26	0.183562	0.559	0.399	4.78058e-23	6	HLA-DQA2
2.91428e-26	0.13485	0.62	0.605	5.82856e-23	6	SLC31A1
6.61149e-26	0.133242	0.605	0.556	1.3223e-22	6	FADS1
1.31603e-25	0.144187	0.543	0.442	2.63206e-22	6	MIR181A1HG
2.04265e-25	0.104436	0.593	0.547	4.0853e-22	6	MPZL1
3.53575e-25	0.115804	0.675	0.623	7.0715e-22	6	AK2
2.09722e-24	0.106179	0.595	0.53	4.19444e-21	6	C12orf45
3.60361e-22	0.118033	0.709	0.688	7.20721e-19	6	SCO1
3.46191e-21	0.114224	0.787	0.722	6.92381e-18	6	AMD1
1.03764e-18	0.142937	0.631	0.601	2.07528e-15	6	NIPSNAP2
6.06433e-15	0.10982	0.513	0.49	1.21287e-11	6	OAF
1.13103e-14	0.122149	0.467	0.222	2.26206e-11	6	TNNT1
3.25463e-14	0.233266	0.544	0.612	6.50926e-11	6	CDKN1A
2.66305e-13	0.113847	0.546	0.551	5.32611e-10	6	RAB34
5.37901e-13	0.102633	0.59	0.556	1.0758e-09	6	STAT5A
1.16507e-12	0.162906	0.531	0.531	2.33014e-09	6	NLN
1.79789e-12	0.19166	0.492	0.319	3.59579e-09	6	BATF3
2.36416e-12	0.158393	0.334	0.179	4.72832e-09	6	CD1E
7.9985e-12	0.146365	0.363	0.505	1.5997e-08	6	IGHG1
4.08356e-11	0.127539	0.378	0.49	8.16712e-08	6	GPAT3
2.84461e-08	0.199461	0.517	0.507	5.68923e-05	6	ALCAM
5.50434e-07	0.116704	0.604	0.658	0.00110087	6	YWHAG
2.2979e-05	0.107491	0.597	0.664	0.0459579	6	RFLNB
0.00174227	0.10773	0.531	0.57	1	6	SAP30
0.00459523	0.194063	0.454	0.342	1	6	BASP1
0	1.52095	0.925	0.693	0	7	GDF15
0	1.50266	0.998	0.851	0	7	AHSP
0	1.46767	0.979	0.699	0	7	TSPO2
0	1.45003	0.988	0.73	0	7	H1F0
0	1.40873	0.997	0.72	0	7	HMBS
0	1.39743	0.996	0.673	0	7	SPTA1
0	1.39171	0.996	0.831	0	7	CA1
0	1.32032	0.995	0.81	0	7	HBD
0	1.30611	0.999	0.733	0	7	TFRC
0	1.30118	0.996	0.825	0	7	BLVRB
0	1.29188	0.99	0.685	0	7	RHAG
0	1.25944	0.999	0.874	0	7	HBM
0	1.23696	0.976	0.789	0	7	GYPB
0	1.16582	0.982	0.693	0	7	GYPA
0	1.15731	0.98	0.751	0	7	SOX6
0	1.09894	0.979	0.596	0	7	EPB42
0	1.08265	1	1	0	7	HBB
0	1.04418	1	0.974	0	7	HBA1
0	1.0114	0.94	0.559	0	7	ARG2
0	1.00221	0.981	0.745	0	7	KLF1
0	0.972733	1	0.99	0	7	HBA2
0	0.962064	0.986	0.787	0	7	UROD
0	0.952722	0.995	0.895	0	7	PRDX2
0	0.92497	0.978	0.661	0	7	GADD45A
0	0.873305	0.953	0.688	0	7	SMIM1
0	0.866353	0.976	0.719	0	7	CA2
0	0.861333	0.903	0.707	0	7	TRIB3
0	0.860217	0.927	0.598	0	7	RHCE
0	0.809168	0.95	0.615	0	7	TRIM10
0	0.808817	0.98	0.75	0	7	TRIM58
0	0.790483	0.941	0.581	0	7	TMEM56
0	0.783397	0.929	0.663	0	7	SMIM5
0	0.74409	0.969	0.647	0	7	SLC40A1
0	0.605034	0.92	0.594	0	7	AC130456.3
0	0.580112	0.926	0.672	0	7	TFR2
0	0.535911	0.889	0.477	0	7	BCAM
1.03747e-303	0.513841	0.862	0.623	2.07494e-300	7	RGS16
3.26552e-303	0.704946	0.926	0.663	6.53104e-300	7	RFESD
1.3318e-301	0.715509	0.867	0.511	2.66361e-298	7	CTSL
5.68354e-301	0.838573	0.965	0.688	1.13671e-297	7	HEMGN
3.24346e-294	0.629519	0.953	0.674	6.48693e-291	7	ABCB10
2.8907e-293	0.544379	0.878	0.605	5.78141e-290	7	ACKR1
4.15033e-293	0.682621	0.953	0.736	8.30067e-290	7	ALAD
2.08414e-286	0.654369	0.942	0.679	4.16827e-283	7	CPOX
9.3952e-282	0.530944	0.928	0.58	1.87904e-278	7	MBOAT2
7.21185e-280	0.646898	0.886	0.639	1.44237e-276	7	NCEH1
3.65003e-278	0.588271	0.904	0.653	7.30006e-275	7	DDIT3
5.43542e-270	0.58637	0.924	0.727	1.08708e-266	7	GATA1
3.01727e-259	0.522696	0.944	0.711	6.03454e-256	7	ARL4A
1.33346e-253	0.457769	0.896	0.61	2.66692e-250	7	CTNNAL1
3.07991e-253	0.57334	0.961	0.68	6.15983e-250	7	UBAC1
4.37899e-249	0.480845	0.897	0.686	8.75797e-246	7	ASNS
1.41912e-248	0.613906	0.999	0.972	2.83824e-245	7	FTH1
2.03516e-247	0.784901	0.851	0.676	4.07033e-244	7	AC024267.1
2.42972e-245	0.465529	0.864	0.613	4.85944e-242	7	GYPE
3.256e-237	0.45056	0.808	0.424	6.512e-234	7	CDH1
1.75951e-232	0.421922	0.81	0.512	3.51902e-229	7	ART4
3.0186e-231	0.232277	0.807	0.428	6.03719e-228	7	IFIT1B
1.14967e-226	0.566343	0.908	0.742	2.29934e-223	7	MYL4
1.58553e-222	0.473348	0.886	0.658	3.17105e-219	7	PRKAR2B
3.35019e-212	0.216749	0.85	0.605	6.70039e-209	7	TMCC2
6.04122e-212	0.143006	0.823	0.536	1.20824e-208	7	FAM83A
2.22339e-211	0.533196	0.933	0.663	4.44679e-208	7	ODC1
7.14714e-206	0.554112	0.949	0.833	1.42943e-202	7	MGST3
2.7126e-203	0.485033	0.89	0.688	5.42519e-200	7	MINPP1
5.763e-202	0.482649	0.988	0.927	1.1526e-198	7	YBX1
4.39872e-201	0.519127	0.942	0.763	8.79744e-198	7	GCLM
7.48026e-200	0.306781	0.835	0.654	1.49605e-196	7	ERFE
2.36875e-199	0.404629	0.887	0.611	4.73751e-196	7	HES6
1.95065e-195	0.384502	0.835	0.649	3.9013e-192	7	ATF5
1.59137e-186	0.455875	0.934	0.7	3.18275e-183	7	TFDP1
1.36973e-184	0.466461	0.809	0.502	2.73947e-181	7	CR1L
6.34873e-180	0.397241	0.903	0.726	1.26975e-176	7	CD36
1.89228e-172	0.259163	0.75	0.509	3.78456e-169	7	KLC3
2.36416e-172	0.414375	0.923	0.746	4.72832e-169	7	IARS
2.87346e-172	0.210824	0.856	0.649	5.74692e-169	7	WARS
1.69904e-166	0.403236	0.941	0.736	3.39808e-163	7	TMEM14C
4.78333e-166	0.380945	0.82	0.613	9.56667e-163	7	RCL1
1.15329e-163	0.23426	0.842	0.622	2.30658e-160	7	CDC42BPA
1.70481e-160	0.347479	0.872	0.654	3.40961e-157	7	NFIA
1.05256e-157	0.376951	0.887	0.686	2.10512e-154	7	TPM1
1.70858e-144	0.377334	0.875	0.689	3.41716e-141	7	ABHD5
6.53723e-143	0.391836	0.798	0.608	1.30745e-139	7	CDKN3
2.42073e-141	0.30853	0.903	0.702	4.84145e-138	7	REXO2
7.13565e-140	0.185333	0.868	0.623	1.42713e-136	7	PCLAF
2.92939e-139	0.535197	0.741	0.613	5.85878e-136	7	RSAD2
2.20648e-138	0.132754	0.804	0.647	4.41296e-135	7	PRR11
2.90871e-135	0.351641	0.933	0.79	5.81743e-132	7	HDGF
1.25989e-133	0.114922	0.748	0.615	2.51979e-130	7	PGF
8.82389e-130	0.321258	0.867	0.65	1.76478e-126	7	OAT
1.9993e-128	0.246772	0.718	0.495	3.99861e-125	7	PBX1
1.29811e-127	0.173617	0.862	0.632	2.59622e-124	7	TUBA1C
3.00838e-124	0.338313	0.941	0.781	6.01677e-121	7	EIF4G1
5.81957e-124	0.251878	0.817	0.669	1.16391e-120	7	SLC38A5
1.65848e-122	0.274913	0.801	0.61	3.31696e-119	7	C9orf40
1.46519e-121	0.303433	0.94	0.795	2.93039e-118	7	CYTOR
3.12904e-120	0.369745	0.753	0.54	6.25807e-117	7	SLC22A16
3.18619e-119	0.219009	0.821	0.701	6.37237e-116	7	DHRS13
2.09352e-118	0.326193	0.785	0.614	4.18704e-115	7	CDT1
9.65987e-115	0.216417	0.784	0.668	1.93197e-111	7	ZNRF1
5.77745e-114	0.412256	0.96	0.86	1.15549e-110	7	SLC25A3
1.27897e-113	0.287021	0.814	0.662	2.55795e-110	7	AMMECR1
1.23911e-110	0.384433	0.939	0.786	2.47822e-107	7	HSPA9
2.00151e-109	0.142473	0.709	0.558	4.00302e-106	7	SELENOP
6.61008e-106	0.218354	0.925	0.768	1.32202e-102	7	HMGA1
1.96576e-105	0.31929	0.953	0.814	3.93151e-102	7	CLTC
2.39523e-104	0.278998	0.745	0.525	4.79045e-101	7	IFI27
6.41743e-104	0.294084	0.849	0.637	1.28349e-100	7	UROS
7.64282e-104	0.155971	0.781	0.633	1.52856e-100	7	CENPN
2.70656e-103	0.201153	0.87	0.753	5.41312e-100	7	MIR4435-2HG
3.96751e-103	0.19384	0.829	0.703	7.93502e-100	7	CREG1
9.99741e-103	0.195751	0.799	0.678	1.99948e-99	7	FAM13A
7.54776e-100	0.312146	0.942	0.793	1.50955e-96	7	EPRS
6.22299e-97	0.235412	0.785	0.614	1.2446e-93	7	SSX2IP
8.97328e-95	0.256537	0.875	0.735	1.79466e-91	7	COPS3
3.26177e-91	0.28004	0.717	0.635	6.52353e-88	7	KEL
2.5344e-90	0.162093	0.898	0.709	5.06879e-87	7	MPC2
3.5386e-90	0.237004	0.813	0.7	7.07719e-87	7	MPST
7.36479e-89	0.197221	0.744	0.597	1.47296e-85	7	PCCB
4.74033e-85	0.248194	0.671	0.423	9.48066e-82	7	XK
3.55399e-83	0.110831	0.847	0.685	7.10798e-80	7	RRM1
5.43099e-81	0.40851	0.92	0.797	1.0862e-77	7	DDIT4
1.30704e-79	0.175641	0.809	0.673	2.61408e-76	7	DAAM1
4.25216e-79	0.131252	0.716	0.638	8.50432e-76	7	PSAT1
3.36889e-77	0.1746	0.731	0.592	6.73778e-74	7	SLC48A1
7.5606e-77	0.268945	0.841	0.699	1.51212e-73	7	FAM117A
3.38718e-76	0.104564	0.786	0.661	6.77435e-73	7	LMNA
2.58464e-75	0.150737	0.769	0.588	5.16929e-72	7	LMO2
3.02475e-74	0.257794	0.668	0.571	6.04951e-71	7	C17orf99
6.47754e-74	0.160702	0.687	0.563	1.29551e-70	7	GCAT
4.31651e-72	0.220772	0.621	0.382	8.63301e-69	7	ARG1
2.72129e-67	0.234253	0.716	0.59	5.44257e-64	7	DNAJA4
1.8076e-64	0.192928	0.873	0.755	3.6152e-61	7	ATG3
1.09063e-63	0.17645	0.904	0.769	2.18127e-60	7	TMEM14B
8.35311e-62	0.20355	0.765	0.67	1.67062e-58	7	PDZD8
8.77757e-61	0.340782	0.809	0.67	1.75551e-57	7	UBE2S
6.33054e-60	0.136445	0.724	0.659	1.26611e-56	7	VEGFA
8.06072e-60	0.10193	0.703	0.569	1.61214e-56	7	ADD2
2.38488e-59	0.261534	0.657	0.542	4.76976e-56	7	PLEK2
2.72726e-59	0.169486	0.701	0.588	5.45452e-56	7	GFI1B
2.19652e-56	0.144166	0.93	0.789	4.39304e-53	7	PRDX1
2.33284e-56	0.239359	0.923	0.823	4.66569e-53	7	TUBB
3.13122e-56	0.156924	0.935	0.813	6.26245e-53	7	TXN
2.47502e-54	0.131601	0.855	0.719	4.95004e-51	7	CYC1
1.25611e-53	0.126441	0.784	0.655	2.51222e-50	7	PTTG1
3.63246e-53	0.171837	0.761	0.63	7.26492e-50	7	MTHFD2
1.35912e-48	0.115741	0.665	0.594	2.71823e-45	7	TROAP
4.51318e-47	0.103838	0.833	0.731	9.02636e-44	7	EIF2S1
4.85253e-45	0.150019	0.941	0.81	9.70506e-42	7	ATP5F1B
8.8078e-43	0.120182	0.734	0.625	1.76156e-39	7	MRPS22
2.49146e-38	0.118524	0.659	0.582	4.98293e-35	7	MND1
2.02552e-37	0.259447	0.564	0.436	4.05105e-34	7	AC092490.1
2.65669e-37	0.149864	0.695	0.697	5.31339e-34	7	ROGDI
1.65161e-36	0.155382	0.679	0.61	3.30322e-33	7	RAB13
9.71274e-36	0.354102	0.574	0.452	1.94255e-32	7	PDZK1IP1
5.11277e-33	0.101909	0.779	0.702	1.02255e-29	7	PLIN2
1.3741e-32	0.106847	0.602	0.506	2.74819e-29	7	ATP1B2
1.1467e-27	0.109397	0.681	0.664	2.29339e-24	7	HSPA1B
2.27893e-25	0.129071	0.637	0.61	4.55786e-22	7	SLC43A1
3.91278e-19	0.156891	0.911	0.841	7.82556e-16	7	HSPA5
2.92134e-17	0.116235	0.993	0.954	5.84269e-14	7	RPLP0
1.33193e-13	0.115914	0.462	0.206	2.66386e-10	7	AC103876.1
2.49306e-09	0.16986	0.889	0.861	4.98612e-06	7	DYNLL1
4.99509e-06	0.115421	0.354	0.401	0.00999018	7	HBZ
0.0008013	0.101204	0.607	0.707	1	7	HBG2
0	2.23799	0.987	0.529	0	8	GZMK
0	1.36665	0.994	0.657	0	8	CCL5
0	1.29101	0.911	0.607	0	8	CCL4
0	1.12185	0.908	0.558	0	8	TRGC2
0	1.0855	0.859	0.457	0	8	CD8B
0	1.04871	0.879	0.473	0	8	CD8A
0	0.67402	0.866	0.441	0	8	CXCR6
0	0.592742	0.885	0.541	0	8	CCL3L1
1.00641e-306	0.82874	0.956	0.726	2.01282e-303	8	PDCD4
6.1499e-302	0.160799	0.805	0.382	1.22998e-298	8	CSF1
1.54114e-286	0.760831	0.805	0.425	3.08228e-283	8	XCL1
3.79926e-270	0.876166	0.833	0.445	7.59853e-267	8	XCL2
2.43015e-265	0.100025	0.753	0.322	4.86029e-262	8	VCAM1
1.55802e-259	0.649797	0.928	0.7	3.11604e-256	8	ALOX5AP
9.25295e-259	0.604399	0.792	0.414	1.85059e-255	8	RGS1
9.3546e-225	0.660183	0.807	0.466	1.87092e-221	8	TIGIT
3.94089e-223	0.615815	0.858	0.522	7.88178e-220	8	CCL3
2.37548e-221	0.704246	0.869	0.623	4.75097e-218	8	LYAR
5.69297e-211	0.540564	0.792	0.469	1.13859e-207	8	CCL4L2
8.64871e-199	0.120146	0.692	0.261	1.72974e-195	8	TOX2
8.38876e-185	0.516149	1	0.97	1.67775e-181	8	RPL3
1.52653e-182	0.748909	0.893	0.646	3.05306e-179	8	IL7R
2.7421e-179	0.569916	0.98	0.83	5.48421e-176	8	HSPA8
4.98803e-178	0.154509	0.886	0.647	9.97606e-175	8	HLA-DQB1
6.20149e-177	0.565721	0.913	0.728	1.2403e-173	8	NUCB2
6.68784e-175	0.731626	0.885	0.614	1.33757e-171	8	TRBC1
7.89767e-168	0.366369	0.915	0.7	1.57953e-164	8	COTL1
1.60494e-160	0.503956	0.974	0.749	3.20989e-157	8	VIM
6.63178e-160	0.455521	0.945	0.803	1.32636e-156	8	S100A10
1.42182e-159	0.716365	0.851	0.682	2.84364e-156	8	KLRB1
6.6144e-152	0.23652	0.837	0.613	1.32288e-148	8	IL2RB
1.30603e-147	0.411191	0.978	0.764	2.61206e-144	8	S100A4
1.65545e-139	0.678088	0.76	0.612	3.3109e-136	8	CD160
6.27701e-137	0.416417	1	0.935	1.2554e-133	8	RPL10A
5.47879e-125	0.380695	1	0.969	1.09576e-121	8	RPS18
4.02971e-120	0.281043	0.793	0.621	8.05943e-117	8	TRGC1
1.04281e-116	0.372149	0.897	0.673	2.08563e-113	8	PEBP1
2.81484e-116	0.410933	0.874	0.724	5.62968e-113	8	MT2A
7.19468e-109	0.17575	0.779	0.535	1.43894e-105	8	SRPRB
1.07048e-106	0.307487	0.805	0.613	2.14097e-103	8	C12orf75
1.74607e-106	0.128456	0.654	0.335	3.49213e-103	8	KLRC2
1.27802e-105	0.370645	0.887	0.741	2.55604e-102	8	PDIA6
1.7895e-98	0.264801	0.867	0.677	3.57901e-95	8	ADH5
4.13577e-97	0.290629	0.626	0.231	8.27155e-94	8	CXCR3
1.06094e-96	0.368405	0.906	0.746	2.12188e-93	8	GTF3A
2.68388e-96	0.128937	0.786	0.562	5.36776e-93	8	TRDC
2.80473e-90	0.293573	1	0.957	5.60946e-87	8	RPL5
1.30748e-87	0.353704	0.765	0.555	2.61495e-84	8	MIF
2.34623e-86	0.249503	0.856	0.669	4.69245e-83	8	PKM
3.46093e-85	0.176699	0.992	0.878	6.92186e-82	8	NPM1
6.67403e-85	0.304895	0.887	0.767	1.33481e-81	8	SRSF9
4.30151e-82	0.11126	0.762	0.531	8.60303e-79	8	GZMH
4.43136e-82	0.125484	0.763	0.614	8.86271e-79	8	MOSPD3
2.02292e-80	0.275539	0.879	0.676	4.04584e-77	8	LDHA
4.57294e-78	0.25453	0.952	0.807	9.14588e-75	8	HSP90B1
6.37907e-78	0.26942	0.707	0.506	1.27581e-74	8	PECAM1
9.97852e-78	0.298976	0.843	0.671	1.9957e-74	8	PGK1
2.84359e-75	0.190548	0.833	0.649	5.68719e-72	8	PUM3
1.6477e-74	0.2911	1	0.917	3.29539e-71	8	PTMA
2.12569e-74	0.194964	0.938	0.799	4.25138e-71	8	LDHB
5.409e-72	0.229853	0.817	0.729	1.0818e-68	8	ECI2
2.16581e-71	0.297602	0.921	0.843	4.33162e-68	8	PARK7
1.44624e-68	0.247147	0.881	0.701	2.89248e-65	8	TPI1
1.03763e-67	0.266251	1	0.955	2.07527e-64	8	RPL7
5.97304e-67	0.229228	0.807	0.662	1.19461e-63	8	MYDGF
6.05766e-67	0.121625	0.823	0.622	1.21153e-63	8	KDM1A
2.72616e-66	0.133646	0.792	0.644	5.45231e-63	8	NIP7
3.20019e-66	0.275823	1	0.963	6.40038e-63	8	RPL7A
9.10699e-65	0.263045	0.901	0.786	1.8214e-61	8	PRELID1
2.33523e-63	0.255298	0.843	0.719	4.67047e-60	8	MDH2
4.68367e-63	0.209564	0.873	0.772	9.36734e-60	8	GSTP1
5.10362e-63	0.149206	0.987	0.9	1.02072e-59	8	GAPDH
5.48239e-63	0.158565	0.764	0.594	1.09648e-59	8	ITPA
3.95321e-62	0.177502	0.683	0.45	7.90643e-59	8	BCL2A1
7.84619e-62	0.124565	0.866	0.685	1.56924e-58	8	SAMHD1
1.29814e-61	0.239713	1	0.981	2.59628e-58	8	RPS2
3.49364e-60	0.185996	0.649	0.562	6.98728e-57	8	MT1E
1.40798e-59	0.200495	0.982	0.88	2.81597e-56	8	NCL
2.43384e-59	0.213224	0.906	0.755	4.86769e-56	8	ENO1
1.89173e-57	0.18862	0.802	0.709	3.78346e-54	8	SRRT
2.74632e-57	0.182893	0.852	0.724	5.49264e-54	8	SMARCC1
8.84743e-57	0.192039	0.593	0.341	1.76949e-53	8	LINC02446
1.43141e-54	0.138882	0.736	0.602	2.86282e-51	8	NTMT1
1.05093e-53	0.232139	0.925	0.803	2.10185e-50	8	HMGN1
1.12953e-52	0.197522	1	0.943	2.25906e-49	8	EEF1B2
1.62637e-51	0.141066	0.793	0.679	3.25275e-48	8	CASP3
1.56865e-50	0.168401	0.733	0.58	3.13729e-47	8	MX1
1.77532e-50	0.110005	0.671	0.54	3.55065e-47	8	HAGHL
1.88463e-49	0.236668	0.833	0.697	3.76926e-46	8	SELENOH
2.1867e-49	0.219513	0.941	0.857	4.37341e-46	8	XRCC5
9.20597e-49	0.229861	0.729	0.66	1.84119e-45	8	MANF
2.86013e-47	0.115292	0.785	0.604	5.72025e-44	8	HSPB1
3.4517e-47	0.178822	0.806	0.685	6.90341e-44	8	FKBP5
4.77397e-47	0.175154	0.849	0.75	9.54794e-44	8	HSPE1
9.54459e-47	0.17002	0.761	0.611	1.90892e-43	8	CDC123
1.23629e-46	0.136849	1	0.985	2.47259e-43	8	MT-CYB
5.25971e-46	0.224098	0.895	0.791	1.05194e-42	8	HNRNPM
1.58985e-45	0.114037	0.765	0.631	3.17969e-42	8	DCAF13
8.18482e-45	0.169704	0.871	0.756	1.63696e-41	8	CANX
2.45272e-43	0.101705	0.777	0.586	4.90543e-40	8	MRPL16
5.41092e-43	0.159707	0.768	0.657	1.08218e-39	8	PPID
1.59e-42	0.113158	0.709	0.55	3.18e-39	8	STAT5A
9.5936e-42	0.169313	0.741	0.617	1.91872e-38	8	BUD23
1.42853e-41	0.152967	0.737	0.598	2.85705e-38	8	DMAC1
4.19461e-41	0.122887	0.732	0.597	8.38922e-38	8	SRM
2.91826e-40	0.146698	0.854	0.704	5.83653e-37	8	SNRPF
5.98315e-40	0.153505	1	0.973	1.19663e-36	8	RPS8
6.18593e-40	0.122407	0.82	0.7	1.23719e-36	8	PLIN2
7.91316e-40	0.166988	1	0.978	1.58263e-36	8	RPS6
6.43034e-39	0.125744	0.783	0.662	1.28607e-35	8	MLEC
2.7895e-38	0.150196	0.943	0.845	5.579e-35	8	PNN
2.80613e-36	0.171515	0.752	0.628	5.61226e-33	8	ISG15
3.06574e-36	0.137045	0.858	0.751	6.13149e-33	8	NDUFS5
1.11933e-34	0.178764	0.893	0.811	2.23867e-31	8	SRSF3
1.8028e-34	0.17231	0.809	0.694	3.6056e-31	8	WBP11
3.15426e-34	0.199018	0.827	0.776	6.30852e-31	8	MRPL20
4.66393e-34	0.142392	0.947	0.86	9.32785e-31	8	SFPQ
1.03575e-33	0.119759	0.696	0.583	2.07151e-30	8	PPIH
1.55498e-32	0.161398	0.821	0.711	3.10996e-29	8	LSM2
2.84421e-32	0.114056	0.885	0.75	5.68842e-29	8	ANP32A
3.00402e-32	0.128852	0.973	0.875	6.00805e-29	8	HNRNPA1
1.32841e-31	0.158667	0.7	0.67	2.65682e-28	8	GCHFR
2.23231e-31	0.108757	0.731	0.67	4.46462e-28	8	ANXA2
1.1192e-30	0.165644	0.761	0.657	2.2384e-27	8	NIFK
4.51189e-30	0.163145	0.724	0.621	9.02379e-27	8	PGAM1
4.79862e-30	0.133854	0.774	0.678	9.59724e-27	8	NOP58
5.115e-30	0.156137	0.963	0.911	1.023e-26	8	CHCHD2
6.629e-30	0.114508	0.835	0.704	1.3258e-26	8	PARP1
7.76312e-29	0.165825	0.889	0.814	1.55262e-25	8	EIF5B
[truncated: 4,802 more rows]

## Sheet: Table S6
Table S6. scRNA-seq cluster markers of MNCs from baseline and EPO tratment samples
p_val	avg_log2FC	pct.1	pct.2	p_val_adj	cluster	gene
0	2.46728	0.856	0.099	0	0	IL7R
0	2.13313	0.741	0.142	0	0	LTB
5.84e-291	1.29706	0.285	0.004	1.36e-286	0	TSHZ2
1.93e-280	1.50448	0.516	0.066	4.51e-276	0	ITK
1.09e-262	1.71059	0.758	0.227	2.55e-258	0	PIK3IP1
4.32e-262	0.890397	0.31	0.013	1.01e-257	0	MAL
1.64e-260	1.57242	0.555	0.105	3.83e-256	0	RCAN3
1.13e-259	1.25158	0.4	0.035	2.62e-255	0	CAMK4
7.13e-256	0.938872	0.277	0.008	1.66e-251	0	LEF1
5.11e-253	1.81258	0.926	0.662	1.19e-248	0	SARAF
4.05e-233	1.47334	0.496	0.076	9.45e-229	0	BCL11B
1.17e-231	1.18654	0.346	0.028	2.74e-227	0	CD28
8.39e-230	1.55543	0.456	0.07	1.96e-225	0	AP3M2
8.3e-223	1.09082	0.261	0.011	1.94e-218	0	TRABD2A
1.11e-221	1.10894	0.32	0.025	2.59e-217	0	CCR7
1.22e-217	1.2849	0.501	0.085	2.86e-213	0	CD6
1.26e-197	1.65671	0.781	0.379	2.93e-193	0	LEPROTL1
5.91e-193	1.15303	0.554	0.116	1.38e-188	0	CD3D
2.24e-189	0.954382	0.366	0.046	5.23e-185	0	TRAC
2.67e-183	1.26873	0.779	0.27	6.24e-179	0	ETS1
8.51e-182	1.21675	0.498	0.103	1.99e-177	0	CD2
1.13e-177	1.26266	0.636	0.177	2.64e-173	0	SPOCK2
3.09e-169	0.718595	0.163	0.002	7.21e-165	0	ADTRP
5.04e-166	1.30628	0.39	0.069	1.18e-161	0	ABLIM1
1.73e-164	1.33035	0.454	0.102	4.03e-160	0	TCF7
4.82e-158	1.09481	0.97	0.814	1.12e-153	0	BTG1
1.11e-157	0.91749	0.501	0.113	2.58e-153	0	CD3E
1.5e-140	1.24608	0.488	0.144	3.5e-136	0	ZEB1
2.22e-140	0.832817	0.354	0.061	5.19e-136	0	TRAT1
3.36e-140	1.06185	0.346	0.067	7.83e-136	0	TESPA1
1.35e-134	1.54236	0.687	0.4	3.15e-130	0	NDFIP1
7.05e-133	1.06332	0.507	0.136	1.64e-128	0	SYNE2
1.48e-130	1.04716	0.402	0.093	3.46e-126	0	IPCEF1
1.85e-130	1.52222	0.605	0.257	4.33e-126	0	CRYBG1
7.25e-130	0.917151	0.209	0.019	1.69e-125	0	ANK3
4.66e-127	1.05283	1	0.996	1.09e-122	0	MALAT1
4.79e-126	0.903691	0.358	0.071	1.12e-121	0	CD3G
6.98e-123	1.37402	0.571	0.239	1.63e-118	0	SFXN1
1.37e-120	0.641296	0.238	0.031	3.2e-116	0	FLT3LG
6.89e-117	1.07249	0.38	0.094	1.61e-112	0	FAM102A
7.29e-117	0.824686	0.344	0.074	1.7e-112	0	OXNAD1
2.67e-115	1.12303	0.497	0.155	6.23e-111	0	STAT4
7.81e-113	1.1959	0.551	0.21	1.82e-108	0	KLF2
1.26e-110	0.976954	0.266	0.047	2.95e-106	0	PASK
1.34e-110	0.77961	0.443	0.119	3.13e-106	0	CD247
1.03e-107	1.41032	0.721	0.447	2.4e-103	0	CNOT6L
5.95e-106	0.947924	0.277	0.053	1.39e-101	0	TXK
3.18e-103	1.19523	0.979	0.883	7.41e-99	0	PABPC1
1.1e-101	1.26308	0.522	0.213	2.57e-97	0	ARID5B
1.14e-99	0.942335	0.578	0.223	2.67e-95	0	SYTL3
4.77e-99	1.042	0.503	0.176	1.11e-94	0	RORA
2.61e-98	0.620528	0.148	0.011	6.08e-94	0	AC133644.2
6.78e-98	0.779328	0.304	0.069	1.58e-93	0	GIMAP7
1.4e-96	0.782258	0.275	0.056	3.28e-92	0	TC2N
4.08e-94	0.636672	0.945	0.972	9.51e-90	0	TPT1
4.31e-94	0.536687	0.178	0.021	1.01e-89	0	FCMR
6.07e-93	0.852385	0.233	0.042	1.42e-88	0	BACH2
4.32e-91	0.565788	0.158	0.016	1.01e-86	0	HABP4
6.9e-91	0.586843	0.182	0.023	1.61e-86	0	TNFSF8
4.45e-90	0.956698	0.82	0.624	1.04e-85	0	DDX24
1.67e-89	0.568303	0.228	0.039	3.89e-85	0	LCK
2.17e-87	0.95155	0.852	0.69	5.06e-83	0	SF1
1.37e-86	0.94753	0.825	0.624	3.21e-82	0	PPP2R5C
5.76e-86	0.654792	0.217	0.037	1.34e-81	0	CD5
1.71e-85	1.14397	0.444	0.174	3.99e-81	0	CLEC2D
1.31e-84	1.60217	0.492	0.238	3.06e-80	0	SESN3
4.67e-84	0.879901	0.941	0.923	1.09e-79	0	RPL30
1.06e-83	0.956718	0.797	0.596	2.48e-79	0	TSC22D3
2.3e-83	0.967372	0.448	0.17	5.36e-79	0	TRBC2
4.3e-83	1.11007	0.748	0.54	1e-78	0	GCC2
7.53e-82	0.681282	0.902	0.898	1.76e-77	0	RPL38
1.93e-81	0.738613	0.294	0.071	4.51e-77	0	IL32
2.43e-81	0.720823	0.939	0.942	5.68e-77	0	RPL34
3.83e-80	0.963354	0.306	0.09	8.93e-76	0	SCML1
3.18e-79	0.554813	0.917	0.917	7.43e-75	0	RPLP2
5.39e-78	0.433253	0.119	0.009	1.26e-73	0	TBC1D4
1.66e-77	0.38518	0.119	0.009	3.87e-73	0	CHRM3-AS2
1.56e-76	0.708953	0.48	0.186	3.64e-72	0	CD69
3.63e-76	0.435949	0.142	0.016	8.47e-72	0	ICOS
4.83e-75	0.813357	0.884	0.895	1.13e-70	0	RPS25
1.03e-74	1.26764	0.836	0.67	2.41e-70	0	TXNIP
1.53e-74	0.701528	0.187	0.032	3.57e-70	0	RGPD2
3.13e-72	0.964846	0.545	0.274	7.29e-68	0	SLC38A1
1.9e-71	0.812867	0.236	0.058	4.43e-67	0	PRKCA
3.99e-71	0.789077	0.668	0.401	9.31e-67	0	CYTIP
7.56e-71	0.98008	0.951	0.951	1.76e-66	0	RPS27
9.24e-71	0.755973	0.846	0.693	2.15e-66	0	STK4
4.46e-69	0.917965	0.536	0.282	1.04e-64	0	MGAT4A
2.65e-67	0.4836	0.144	0.019	6.18e-63	0	NELL2
1.3e-65	0.851858	0.324	0.115	3.02e-61	0	ITPKB
1.55e-65	0.967039	0.566	0.292	3.61e-61	0	FYN
1.66e-64	0.717412	0.895	0.894	3.88e-60	0	RPL36
3.32e-64	0.938182	0.369	0.15	7.74e-60	0	SGTB
7.29e-64	0.859938	0.479	0.243	1.7e-59	0	OCIAD2
1.08e-62	0.757199	0.296	0.091	2.51e-58	0	TRBC1
1.86e-62	0.630248	0.914	0.913	4.33e-58	0	RPL9
3.01e-61	0.982292	0.465	0.231	7.02e-57	0	BIRC3
2.18e-60	0.624844	0.584	0.354	5.08e-56	0	SOD1
4.02e-60	1.19009	0.509	0.311	9.39e-56	0	PRMT2
6.8e-60	0.312488	0.106	0.011	1.59e-55	0	CD40LG
1.8e-59	0.316351	0.12	0.015	4.2e-55	0	CD27
4.63e-59	0.550497	0.942	0.931	1.08e-54	0	RPL32
1.26e-58	0.558368	0.95	0.945	2.95e-54	0	RPL13
1.32e-58	1.02376	0.702	0.554	3.08e-54	0	FOXP1
1.48e-57	0.705679	0.913	0.906	3.44e-53	0	RPS15A
2.45e-57	0.745184	0.427	0.18	5.73e-53	0	ARL4C
1.1e-56	0.535273	0.917	0.905	2.56e-52	0	RPL14
1.49e-56	0.571532	0.81	0.633	3.48e-52	0	CALM1
5.22e-56	0.481936	0.194	0.045	1.22e-51	0	P2RY10
3.51e-55	0.677469	0.817	0.727	8.19e-51	0	NOP53
6.27e-55	0.645295	0.371	0.146	1.46e-50	0	CD7
7.65e-55	0.916437	0.586	0.374	1.78e-50	0	FYB1
8.51e-55	0.530896	0.212	0.056	1.99e-50	0	GIMAP4
4.01e-54	0.627977	0.163	0.034	9.37e-50	0	APBA2
3.77e-53	0.361666	0.958	0.963	8.79e-49	0	EEF1A1
7.78e-52	0.625416	0.822	0.794	1.82e-47	0	EEF1D
1.37e-51	0.984497	0.531	0.366	3.19e-47	0	RGS10
3.48e-51	0.638282	0.638	0.435	8.12e-47	0	SMAP2
6.42e-50	0.485923	0.122	0.02	1.5e-45	0	TRAF1
1.34e-49	0.516811	0.923	0.932	3.12e-45	0	RPL11
2.06e-49	0.753179	0.686	0.564	4.8e-45	0	AES
5.08e-49	0.547913	0.446	0.205	1.19e-44	0	ISG20
1e-48	0.884743	0.881	0.768	2.34e-44	0	ANKRD12
1.16e-48	0.620426	0.893	0.865	2.7e-44	0	RPS16
1.38e-48	0.613941	0.792	0.674	3.21e-44	0	SMCHD1
4.18e-48	0.680418	0.272	0.103	9.74e-44	0	NCK2
1.61e-47	0.471785	0.899	0.898	3.77e-43	0	RPL24
4.85e-47	0.440466	0.222	0.068	1.13e-42	0	AP002387.2
5.77e-47	0.81644	0.919	0.904	1.35e-42	0	RPS29
7.45e-47	0.516543	0.905	0.927	1.74e-42	0	RPS28
9.83e-47	0.921784	0.43	0.247	2.29e-42	0	SNX9
1.2e-46	0.406095	0.933	0.95	2.79e-42	0	RPL37
1.38e-46	0.459015	0.926	0.944	3.22e-42	0	RPL39
2.64e-46	0.85648	0.356	0.164	6.15e-42	0	RNF125
6.45e-46	0.655714	0.883	0.865	1.51e-41	0	RPS21
1.23e-45	0.631288	0.218	0.07	2.87e-41	0	AC025164.1
1.73e-45	0.844753	0.726	0.702	4.04e-41	0	TOMM7
3.8e-45	0.576126	0.897	0.871	8.86e-41	0	RPL23A
3.88e-45	0.421048	0.12	0.022	9.06e-41	0	PATJ
4.08e-45	0.7221	0.467	0.257	9.52e-41	0	CCSER2
4.1e-45	0.755165	0.375	0.188	9.57e-41	0	AC026979.2
4.62e-45	0.5268	0.199	0.061	1.08e-40	0	SH3YL1
1.2e-44	0.859528	0.431	0.255	2.8e-40	0	TGFBR2
1.33e-44	0.512385	0.285	0.109	3.09e-40	0	IFITM1
1.63e-44	0.624235	0.718	0.572	3.81e-40	0	PIK3R1
1.97e-44	0.66036	0.218	0.071	4.59e-40	0	SFI1
4.48e-44	0.615978	0.938	0.93	1.04e-39	0	RPL10
1.13e-43	0.433098	0.148	0.033	2.64e-39	0	BICDL1
5.45e-43	0.717163	0.615	0.465	1.27e-38	0	LIMD2
5.32e-42	0.541643	0.202	0.064	1.24e-37	0	AC243960.1
7.4e-42	0.651026	0.997	0.905	1.73e-37	0	MTRNR2L12
1.04e-41	0.688836	0.691	0.583	2.43e-37	0	IKZF1
1.08e-41	0.776091	0.371	0.181	2.52e-37	0	ZNF331
4.43e-41	0.848604	0.361	0.19	1.03e-36	0	RASA3
1.88e-40	0.642059	0.849	0.854	4.39e-36	0	RPS26
3.88e-40	0.685248	0.671	0.535	9.05e-36	0	CD48
4.34e-40	0.411561	0.139	0.032	1.01e-35	0	TNFRSF25
5.01e-40	0.746101	0.469	0.306	1.17e-35	0	DYNLT1
1.17e-39	0.433875	0.918	0.913	2.73e-35	0	RPL19
1.6e-39	0.797601	0.532	0.38	3.72e-35	0	MPHOSPH8
2.09e-39	0.695468	0.295	0.134	4.88e-35	0	PDE3B
3.47e-39	0.498671	0.894	0.801	8.1e-35	0	PNRC1
7.31e-39	0.809497	0.499	0.316	1.71e-34	0	ATM
1.99e-38	0.336389	0.174	0.05	4.63e-34	0	SELENOM
4.99e-38	0.699142	0.318	0.147	1.16e-33	0	CREM
5.35e-38	0.382455	0.122	0.027	1.25e-33	0	S1PR1
6.69e-38	0.567419	0.174	0.053	1.56e-33	0	TNIK
2.94e-37	0.419513	0.902	0.906	6.85e-33	0	RPL18
3.37e-37	0.78537	0.652	0.523	7.86e-33	0	EML4
3.87e-37	0.523853	0.644	0.492	9.02e-33	0	SRSF7
6.35e-37	0.700114	0.327	0.158	1.48e-32	0	AC058791.1
2.69e-36	0.637418	0.754	0.66	6.27e-32	0	FXYD5
3.62e-35	0.373571	0.124	0.03	8.44e-31	0	RIC3
9.77e-35	0.396734	0.144	0.039	2.28e-30	0	GATA3
1.23e-34	0.653325	0.895	0.902	2.87e-30	0	RPL21
1.63e-34	0.517642	0.734	0.633	3.8e-30	0	CDC42SE2
2.16e-34	0.958673	0.462	0.312	5.05e-30	0	SAMHD1
3.14e-34	0.543212	0.267	0.122	7.31e-30	0	2022-09-01
3.38e-34	0.357187	0.14	0.038	7.9e-30	0	CAMK2D
7.21e-34	0.683534	0.445	0.29	1.68e-29	0	GSPT1
1.47e-33	0.528499	0.453	0.27	3.43e-29	0	RBM38
1.7e-33	0.441059	0.876	0.907	3.97e-29	0	FAU
3.76e-33	0.328145	0.912	0.91	8.78e-29	0	RPL27A
8.53e-33	0.633647	0.218	0.087	1.99e-28	0	PPM1K
8.94e-33	0.412714	0.163	0.054	2.09e-28	0	FHIT
2.23e-32	0.62792	0.844	0.857	5.2e-28	0	RPS13
2.92e-32	0.542412	0.704	0.635	6.82e-28	0	SKP1
3.62e-32	0.661236	0.492	0.307	8.45e-28	0	CEMIP2
4.05e-32	0.735216	0.673	0.6	9.45e-28	0	PDCD4
1.42e-31	0.507746	0.772	0.761	3.32e-27	0	COX7C
2.12e-31	0.501961	0.894	0.904	4.94e-27	0	RPL35A
3.47e-31	0.658237	0.72	0.635	8.09e-27	0	N4BP2L2
4.18e-31	0.587583	0.131	0.037	9.76e-27	0	TTN
5.47e-31	0.863179	0.255	0.125	1.28e-26	0	SERINC5
6.09e-31	0.584713	0.275	0.13	1.42e-26	0	SLFN5
6.48e-31	0.810671	0.507	0.402	1.51e-26	0	RNASET2
9.23e-31	0.954331	0.681	0.602	2.15e-26	0	JUNB
1.02e-30	0.652807	0.498	0.364	2.38e-26	0	C12orf57
1.5e-30	0.484151	0.199	0.08	3.51e-26	0	GIMAP1
2.97e-30	0.387427	0.149	0.047	6.93e-26	0	SOCS1
4.13e-30	0.416665	0.908	0.937	9.63e-26	0	RPS14
6.07e-30	0.767298	0.311	0.179	1.42e-25	0	NOSIP
7.94e-30	0.834196	0.474	0.351	1.85e-25	0	IL6ST
1.43e-29	0.316997	0.185	0.066	3.32e-25	0	LBH
1.44e-29	1.11197	0.478	0.344	3.35e-25	0	GABPB1-AS1
4.38e-29	0.672455	0.367	0.21	1.02e-24	0	TSPYL2
5.04e-29	0.400204	0.111	0.029	1.18e-24	0	FXYD7
7.39e-29	0.447011	0.237	0.1	1.72e-24	0	CD96
1.82e-28	0.621306	0.219	0.097	4.24e-24	0	ZNF101
2.72e-28	0.695782	0.313	0.176	6.35e-24	0	KIAA0355
3.02e-28	0.786141	0.566	0.467	7.05e-24	0	TUT4
4.88e-28	0.552628	0.482	0.336	1.14e-23	0	SVIP
9.88e-28	0.468731	0.132	0.041	2.3e-23	0	AL365361.1
2.32e-27	0.554253	0.161	0.058	5.42e-23	0	PLEKHA1
2.59e-27	0.4508	0.146	0.049	6.05e-23	0	SDR42E2
6.2e-27	0.455333	0.177	0.069	1.45e-22	0	NDUFV2-AS1
7.27e-27	0.452564	0.165	0.06	1.7e-22	0	KLF12
1.34e-26	0.345779	0.101	0.026	3.13e-22	0	MORN3
1.71e-26	0.411527	0.189	0.075	3.98e-22	0	SKAP1
2.69e-26	0.661621	0.776	0.754	6.28e-22	0	RPS10
3.42e-26	0.305367	0.924	0.916	7.98e-22	0	RPL13A
1.22e-25	0.559562	0.707	0.694	2.85e-21	0	RPS4Y1
1.22e-25	0.603224	0.323	0.19	2.86e-21	0	TOB1
1.57e-25	0.340059	0.903	0.868	3.65e-21	0	RPL31
2.06e-25	0.571702	0.148	0.053	4.8e-21	0	PGGHG
2.14e-25	0.721371	0.45	0.342	5e-21	0	DDX18
1.07e-24	0.457253	0.328	0.19	2.5e-20	0	RARRES3
1.12e-24	0.35756	0.146	0.052	2.62e-20	0	GRK5
1.27e-24	0.516147	0.214	0.101	2.97e-20	0	CDC37L1
1.71e-24	0.345232	0.169	0.064	3.99e-20	0	LY9
1.83e-24	0.290276	0.914	0.902	4.26e-20	0	RPL5
2.86e-24	0.499658	0.236	0.109	6.67e-20	0	RASGRP1
4.4e-24	0.337457	0.96	0.93	1.03e-19	0	EIF1
4.98e-24	0.647696	0.247	0.133	1.16e-19	0	SC5D
5.1e-24	0.579531	0.874	0.79	1.19e-19	0	PRRC2C
1.82e-23	0.455916	0.146	0.056	4.24e-19	0	CHMP7
3.13e-23	0.560079	0.62	0.551	7.29e-19	0	RNMT
4.23e-23	0.369258	0.121	0.039	9.88e-19	0	ZAP70
4.3e-23	0.498822	0.581	0.529	1e-18	0	C19orf53
6.93e-23	0.579321	0.873	0.899	1.62e-18	0	RPS27A
2.59e-22	0.777292	0.387	0.275	6.05e-18	0	GOLGA8B
3.11e-22	0.439868	0.786	0.706	7.25e-18	0	RBMX
4.26e-22	0.37888	0.212	0.102	9.93e-18	0	SNRPN
4.47e-22	0.252733	0.951	0.954	1.04e-17	0	RPL28
7.87e-22	0.795682	0.445	0.352	1.84e-17	0	ARID5A
1.3e-21	0.686616	0.395	0.277	3.02e-17	0	BTG2
4.31e-21	0.292598	0.897	0.898	1.01e-16	0	UBA52
5.89e-21	0.347067	0.663	0.585	1.37e-16	0	GYPC
7.92e-21	0.652823	0.29	0.177	1.85e-16	0	DGKA
9.22e-21	0.432192	0.817	0.788	2.15e-16	0	RPL36A
1.02e-20	0.247411	0.897	0.812	2.38e-16	0	HLA-A
1.16e-20	0.278536	0.921	0.923	2.71e-16	0	RPS15
1.49e-20	0.441036	0.826	0.763	3.47e-16	0	MBNL1
1.58e-20	0.446235	0.752	0.7	3.7e-16	0	NSA2
1.6e-20	0.359049	0.83	0.86	3.74e-16	0	RPL27
3.13e-20	0.392658	0.837	0.736	7.3e-16	0	NAP1L1
3.42e-20	0.630378	0.363	0.255	7.97e-16	0	EVL
3.71e-20	0.354017	0.14	0.054	8.66e-16	0	PBX4
3.83e-20	0.328895	0.905	0.91	8.94e-16	0	RPS23
4.64e-20	0.210478	0.926	0.936	1.08e-15	0	RPL29
1.51e-19	0.391903	0.918	0.926	3.53e-15	0	RPS3A
1.62e-19	0.329234	0.937	0.885	3.77e-15	0	DDX5
2.42e-19	0.515409	0.633	0.603	5.64e-15	0	COMMD6
8.73e-19	0.61272	0.269	0.167	2.04e-14	0	ZC3H8
9.45e-19	0.595916	0.446	0.369	2.21e-14	0	TMED4
1.58e-18	0.295335	0.919	0.921	3.68e-14	0	RPL18A
1.74e-18	0.456148	0.248	0.142	4.05e-14	0	BEX2
1.78e-18	0.520321	0.377	0.266	4.15e-14	0	FAM177A1
2.6e-18	0.513302	0.111	0.041	6.07e-14	0	RTKN2
2.67e-18	0.448585	0.774	0.691	6.22e-14	0	ZFP36L2
5.65e-18	0.447425	0.175	0.087	1.32e-13	0	SFMBT1
5.86e-18	0.56343	0.286	0.183	1.37e-13	0	CCDC66
6.47e-18	0.423622	0.576	0.49	1.51e-13	0	STK17A
1.22e-17	0.670983	0.479	0.409	2.85e-13	0	TTC3
1.24e-17	0.486295	0.286	0.179	2.9e-13	0	RHOH
1.78e-17	0.559587	0.277	0.175	4.16e-13	0	SP140L
1.87e-17	0.465143	0.536	0.481	4.35e-13	0	CIB1
2.41e-17	0.389158	0.72	0.69	5.61e-13	0	CIRBP
2.54e-17	0.297774	0.9	0.906	5.94e-13	0	RPL3
2.93e-17	0.516492	0.303	0.202	6.84e-13	0	BIN1
3.11e-17	0.290556	0.169	0.081	7.26e-13	0	ANXA2R
5.22e-17	0.401217	0.178	0.087	1.22e-12	0	AC044849.1
6.45e-17	0.571626	0.309	0.208	1.51e-12	0	NLRP1
8.95e-17	0.546998	0.493	0.437	2.09e-12	0	SBDS
9.35e-17	0.412371	0.188	0.098	2.18e-12	0	C12orf65
9.38e-17	0.303006	0.873	0.865	2.19e-12	0	RPL22
1.18e-16	0.256862	0.595	0.488	2.75e-12	0	TNFAIP3
1.26e-16	0.278261	0.879	0.872	2.94e-12	0	RPS20
1.28e-16	0.238565	0.933	0.927	2.99e-12	0	RPS6
1.44e-16	0.296933	0.695	0.655	3.35e-12	0	NDUFS5
1.72e-16	0.447845	0.739	0.641	4.01e-12	0	AAK1
3.7e-16	0.362261	0.723	0.662	8.62e-12	0	EIF3E
3.76e-16	0.41251	0.6	0.533	8.78e-12	0	FAM107B
5.34e-16	0.451379	0.653	0.626	1.25e-11	0	RPL17
5.58e-16	0.479424	0.153	0.07	1.3e-11	0	SYTL2
5.73e-16	0.597518	0.333	0.248	1.34e-11	0	TMEM243
6.32e-16	0.374075	0.686	0.677	1.47e-11	0	UBE2B
1.26e-15	0.484495	0.55	0.523	2.95e-11	0	C9orf78
1.46e-15	0.645256	0.327	0.236	3.4e-11	0	TTTY15
1.58e-15	0.480686	0.685	0.664	3.68e-11	0	DDX6
1.79e-15	0.143798	0.85	0.806	4.19e-11	0	NPM1
1.89e-15	0.239748	0.933	0.923	4.42e-11	0	RPS8
2.05e-15	0.48819	0.214	0.117	4.79e-11	0	IKZF3
2.12e-15	0.554457	0.443	0.372	4.95e-11	0	NAP1L4
6.73e-15	0.276552	0.817	0.808	1.57e-10	0	TMA7
8.9e-15	0.380705	0.912	0.938	2.08e-10	0	RPS12
1.22e-14	0.442315	0.243	0.151	2.84e-10	0	GCHFR
1.37e-14	0.280746	0.662	0.617	3.19e-10	0	STK17B
1.57e-14	0.544062	0.217	0.13	3.66e-10	0	FOXO1
2.01e-14	0.340887	0.134	0.063	4.68e-10	0	THAP7
5.07e-14	0.273806	0.108	0.045	1.18e-09	0	SP140
5.35e-14	0.465667	0.267	0.182	1.25e-09	0	MTERF4
8.48e-14	0.514738	0.584	0.566	1.98e-09	0	STAT3
1.03e-13	0.369087	0.913	0.941	2.41e-09	0	RPL41
1.07e-13	0.555434	0.212	0.129	2.49e-09	0	CMSS1
1.32e-13	0.451213	0.164	0.088	3.07e-09	0	ZBTB25
1.34e-13	0.267112	0.854	0.851	3.12e-09	0	RPSA
1.48e-13	0.294067	0.168	0.088	3.46e-09	0	SLC44A2
1.93e-13	0.229578	0.627	0.569	4.49e-09	0	LDHB
2.46e-13	0.423183	0.194	0.117	5.74e-09	0	GIMAP2
2.72e-13	0.467642	0.573	0.552	6.35e-09	0	SELENOK
2.9e-13	0.108173	0.076	0.194	6.77e-09	0	RFX7
4.7e-13	0.428162	0.108	0.048	1.1e-08	0	GNB5
5.12e-13	0.377993	0.142	0.073	1.19e-08	0	SUN1
5.38e-13	0.282916	0.257	0.159	1.26e-08	0	OPTN
6.51e-13	0.33695	0.101	0.043	1.52e-08	0	AL357060.1
9.24e-13	0.479739	0.544	0.502	2.15e-08	0	TNRC6B
1.52e-12	0.471029	0.246	0.164	3.54e-08	0	BCL2
2.1e-12	0.385535	0.207	0.128	4.91e-08	0	RBM43
2.23e-12	0.429493	0.188	0.112	5.19e-08	0	DYRK2
2.89e-12	0.43127	0.12	0.056	6.74e-08	0	MAF
3.25e-12	0.419046	0.68	0.637	7.57e-08	0	DDX21
3.5e-12	0.185154	0.894	0.887	8.17e-08	0	RPS4X
5.88e-12	0.371754	0.691	0.668	1.37e-07	0	RPS17
8.09e-12	0.299853	0.119	0.058	1.89e-07	0	BEX5
8.16e-12	0.325624	0.142	0.075	1.9e-07	0	LAT
9.15e-12	0.325368	0.175	0.104	2.14e-07	0	CFAP36
1.04e-11	0.466782	0.375	0.311	2.42e-07	0	KIF2A
1.31e-11	0.600798	0.411	0.362	3.06e-07	0	ARHGEF1
1.39e-11	0.47997	0.277	0.205	3.25e-07	0	UGP2
1.55e-11	0.298226	0.124	0.061	3.61e-07	0	CBX7
1.91e-11	0.488411	0.443	0.385	4.46e-07	0	PSIP1
2.15e-11	0.284257	0.122	0.06	5.02e-07	0	ZNF507
3.34e-11	0.697739	0.334	0.273	7.8e-07	0	USP36
3.4e-11	0.253749	0.353	0.254	7.93e-07	0	FKBP11
4.47e-11	0.154615	0.892	0.895	1.04e-06	0	RPL8
4.62e-11	0.475688	0.309	0.232	1.08e-06	0	PHF1
5.41e-11	0.523328	0.212	0.14	1.26e-06	0	ZC3H6
7.75e-11	0.499674	0.231	0.158	1.81e-06	0	P2RY8
8.43e-11	0.549462	0.4	0.352	1.97e-06	0	JOSD1
1.01e-10	0.541275	0.426	0.388	2.36e-06	0	CWF19L2
1.26e-10	0.393337	0.285	0.197	2.93e-06	0	PRDM1
1.38e-10	0.546639	0.233	0.164	3.21e-06	0	WWP1
2.31e-10	0.23855	0.898	0.842	5.39e-06	0	SON
2.77e-10	0.308651	0.179	0.113	6.47e-06	0	TMEM238
3.77e-10	0.234557	0.788	0.806	8.8e-06	0	COX4I1
4.27e-10	0.439124	0.237	0.17	9.97e-06	0	RHBDD2
4.47e-10	0.385362	0.66	0.649	1.04e-05	0	ARGLU1
4.71e-10	0.520087	0.188	0.123	1.1e-05	0	POLR3E
4.89e-10	0.421038	0.313	0.241	1.14e-05	0	XPO6
5.01e-10	0.272811	0.106	0.051	1.17e-05	0	MIAT
5.48e-10	0.442362	0.248	0.184	1.28e-05	0	HAX1
6.2e-10	0.351197	0.569	0.573	1.45e-05	0	UBE2D2
6.29e-10	0.566413	0.484	0.473	1.47e-05	0	KAT6A
9.73e-10	0.100534	0.11	0.222	2.27e-05	0	NAA25
1e-09	0.384868	0.218	0.145	2.33e-05	0	PRKCH
1.43e-09	0.362855	0.622	0.624	3.33e-05	0	MECP2
1.74e-09	0.127665	0.098	0.204	4.07e-05	0	METTL14
1.77e-09	0.253377	0.791	0.79	4.12e-05	0	UQCRB
2.64e-09	0.54319	0.377	0.322	6.16e-05	0	MALT1
2.8e-09	0.133068	0.193	0.341	6.54e-05	0	TTC17
5.28e-09	0.489732	0.729	0.696	0.000123113	0	NKTR
5.37e-09	0.358575	0.107	0.055	0.000125175	0	DUSP4
6.13e-09	0.323329	0.195	0.13	0.000143019	0	CRIP1
7.16e-09	0.371075	0.267	0.198	0.000167077	0	SOCS3
9.21e-09	0.397622	0.475	0.444	0.000214837	0	EZR
1.12e-08	0.529201	0.209	0.149	0.000261042	0	MTR
1.36e-08	0.249601	0.825	0.851	0.000317628	0	RPL10A
1.58e-08	0.336668	1	0.975	0.000368387	0	MT-ND3
1.76e-08	0.109188	0.132	0.245	0.000410844	0	ATP9B
1.88e-08	0.472246	0.41	0.371	0.000438054	0	MBP
2.55e-08	0.298997	0.115	0.065	0.000596049	0	DEAF1
3.25e-08	0.320916	0.135	0.081	0.000759281	0	CASK
3.41e-08	0.247431	0.391	0.317	0.000795454	0	JUN
3.59e-08	0.571777	0.27	0.22	0.000836703	0	DOCK10
4.01e-08	0.257746	0.747	0.764	0.000934849	0	RPL36AL
4.11e-08	0.415607	0.298	0.249	0.000958699	0	MCUB
4.9e-08	0.45292	0.636	0.638	0.00114268	0	FAM133B
4.91e-08	0.485372	0.261	0.208	0.00114568	0	SELL
5.1e-08	0.510549	0.214	0.158	0.00118898	0	XPC
5.56e-08	0.391597	0.126	0.075	0.00129699	0	TNRC6C
5.77e-08	0.175823	0.9	0.907	0.00134551	0	RPS7
6.36e-08	0.304688	0.187	0.13	0.00148316	0	SMIM27
7.06e-08	0.420365	0.216	0.157	0.00164596	0	RANGAP1
7.32e-08	0.190416	0.101	0.053	0.00170778	0	GPR174
8.34e-08	0.349774	0.226	0.165	0.00194584	0	HAUS3
1.18e-07	0.205503	0.893	0.914	0.00274896	0	RPS3
1.29e-07	0.258415	0.668	0.642	0.00299857	0	TAF1D
1.3e-07	0.115826	0.197	0.332	0.00304326	0	CEBPG
1.41e-07	0.657408	0.285	0.235	0.00328544	0	GPRIN3
1.47e-07	0.292668	0.586	0.579	0.00343675	0	EPB41L4A-AS1
1.5e-07	0.179491	0.177	0.299	0.00350984	0	FAM129A
1.51e-07	0.444394	0.446	0.426	0.00352578	0	CASP8
1.54e-07	0.272726	0.61	0.619	0.00360381	0	C11orf58
1.57e-07	0.37541	0.454	0.443	0.00366902	0	ISCU
1.6e-07	0.148992	0.179	0.304	0.0037418	0	CCNL2
1.73e-07	0.120018	0.182	0.309	0.00402862	0	RERE
1.8e-07	0.207	0.859	0.881	0.00418799	0	RPL26
1.84e-07	0.619994	0.242	0.192	0.00429257	0	SLC39A10
1.93e-07	0.171974	0.904	0.925	0.00450409	0	RPS19
2.08e-07	0.307958	0.23	0.167	0.00485244	0	ITM2A
2.78e-07	0.238574	0.77	0.736	0.00649129	0	SYF2
2.93e-07	0.143497	0.127	0.23	0.00683451	0	ARHGEF7
3.94e-07	0.100269	0.187	0.311	0.0091997	0	CEP95
4.3e-07	0.324334	0.17	0.118	0.0100263	0	MHENCR
4.9e-07	0.235557	0.637	0.64	0.0114398	0	ATP6V1G1
4.97e-07	0.551632	0.323	0.289	0.0115972	0	ENTPD4
6.06e-07	0.302727	0.142	0.092	0.01414	0	AC114760.2
9.77e-07	0.112081	0.063	0.132	0.0227844	0	SETD7
1.04e-06	0.306212	0.116	0.072	0.0243225	0	LINS1
1.39e-06	0.446569	0.327	0.284	0.0324352	0	RASA2
1.44e-06	0.360845	0.507	0.522	0.0336937	0	PAK2
1.59e-06	0.249621	0.618	0.617	0.0369976	0	SNHG9
1.61e-06	0.340472	0.156	0.108	0.0375027	0	NUDCD3
1.97e-06	0.181578	0.779	0.83	0.0459366	0	RPS5
2e-06	0.341903	0.25	0.204	0.0467371	0	NBDY
2.08e-06	0.274957	0.605	0.629	0.0485033	0	ELF1
2.13e-06	0.561418	0.209	0.161	0.0497102	0	LPIN1
2.32e-06	0.12947	0.12	0.208	0.0541401	0	KDM5D
2.72e-06	0.117069	0.238	0.371	0.0633419	0	YARS
2.79e-06	0.32986	0.127	0.083	0.0651623	0	AL021453.1
2.86e-06	0.100696	0.1	0.179	0.0667569	0	RPS6KA5
3.01e-06	0.419498	0.537	0.54	0.0702273	0	TMEM123
3.01e-06	0.269446	0.499	0.506	0.0703357	0	GTF3A
3.48e-06	0.244989	0.66	0.669	0.0810792	0	EIF4A2
3.79e-06	0.193953	0.11	0.067	0.088469	0	GPR155
3.86e-06	0.240956	0.192	0.141	0.0900015	0	C1orf56
4.03e-06	0.103799	0.121	0.207	0.0940823	0	ZBTB10
4.15e-06	0.123041	0.063	0.126	0.096764	0	ZNF736
4.17e-06	0.172013	0.88	0.856	0.0972956	0	RPL4
4.31e-06	0.119356	0.836	0.843	0.100563	0	EEF1B2
4.51e-06	0.146681	0.794	0.796	0.105216	0	BTF3
5.28e-06	0.160497	0.164	0.269	0.123254	0	DDB1
5.42e-06	0.119909	0.884	0.893	0.126358	0	RPL35
5.93e-06	0.505696	0.427	0.417	0.138328	0	FKBP5
5.94e-06	0.312898	0.565	0.585	0.138499	0	NSD3
6.67e-06	0.408681	0.158	0.113	0.155588	0	CEP85L
7.03e-06	0.306615	0.136	0.094	0.16392	0	ADPRM
8.19e-06	0.502361	0.444	0.44	0.191155	0	KMT2A
8.43e-06	0.175151	0.184	0.292	0.196757	0	N4BP2
8.71e-06	0.25594	0.429	0.431	0.203287	0	NDUFB8
8.9e-06	0.325739	0.165	0.119	0.207743	0	BCL9L
9.59e-06	0.144538	0.177	0.285	0.223779	0	FNTA
1e-05	0.317853	0.438	0.442	0.233491	0	MED10
1.05e-05	0.164704	0.859	0.873	0.24591	0	RPL23
1.06e-05	0.462355	0.43	0.435	0.246501	0	TPR
1.12e-05	0.508835	0.372	0.366	0.262347	0	BIRC2
1.3e-05	0.339528	0.169	0.127	0.302326	0	CCM2
1.42e-05	0.247052	0.6	0.626	0.330209	0	YTHDC1
1.53e-05	0.40701	0.347	0.328	0.356992	0	ORMDL1
1.62e-05	0.213768	0.618	0.603	0.378639	0	C6orf48
1.83e-05	0.502846	0.295	0.258	0.427113	0	ANKRD44
2e-05	0.145533	0.184	0.292	0.465699	0	MUC20-OT1
2.19e-05	0.499312	0.472	0.486	0.51112	0	RNF19A
2.2e-05	0.105048	0.057	0.111	0.513674	0	EPS8
2.35e-05	0.334777	0.382	0.353	0.547388	0	ADD3
2.38e-05	0.273145	0.179	0.136	0.55621	0	RBL1
2.65e-05	0.443338	0.221	0.173	0.619026	0	SH2D1A
2.71e-05	0.193704	0.165	0.263	0.631624	0	LONP2
2.73e-05	0.148915	0.185	0.291	0.636956	0	CHORDC1
2.86e-05	0.31947	0.106	0.069	0.668185	0	MTX3
2.89e-05	0.340743	0.115	0.076	0.673049	0	RAPGEF6
3.17e-05	0.628917	0.357	0.349	0.740474	0	PCSK7
3.37e-05	0.149151	0.17	0.269	0.787225	0	SEC23A
3.62e-05	0.346217	0.238	0.207	0.845541	0	CCDC57
3.63e-05	0.43047	0.213	0.175	0.847133	0	OTUD6B-AS1
3.9e-05	0.141663	0.12	0.079	0.910285	0	PIM2
3.91e-05	0.385092	0.352	0.329	0.911897	0	NOP58
4.17e-05	0.133518	0.078	0.14	0.9723	0	ZCCHC3
4.22e-05	0.134125	0.107	0.181	0.984554	0	SCO1
4.51e-05	0.353127	0.392	0.395	1	0	CHURC1
4.51e-05	0.246136	0.346	0.322	1	0	COX14
4.66e-05	0.346403	0.161	0.12	1	0	LINC00513
4.78e-05	0.279199	0.198	0.156	1	0	DYNLT3
4.88e-05	0.130944	0.188	0.291	1	0	MATR3.1
4.91e-05	0.143379	0.1	0.169	1	0	DDX19A
4.94e-05	0.105351	0.188	0.289	1	0	SIN3A
5.32e-05	0.255593	0.102	0.067	1	0	ANKH
5.48e-05	0.150494	0.642	0.657	1	0	SNHG8
5.69e-05	0.142852	0.343	0.496	1	0	KANSL1
6.09e-05	0.19563	0.352	0.533	1	0	NR3C1
6.19e-05	0.386283	0.348	0.329	1	0	SARS
6.57e-05	0.140654	0.081	0.141	1	0	SLC25A16
6.78e-05	0.318737	0.226	0.189	1	0	NECAP2
7.06e-05	0.10188	0.129	0.207	1	0	CBWD1
7.21e-05	0.380472	0.565	0.589	1	0	PHF3
7.41e-05	0.268724	0.448	0.45	1	0	CAMLG
7.65e-05	0.376093	0.148	0.109	1	0	PBXIP1
8.5e-05	0.35995	0.298	0.273	1	0	CDKN1B
8.53e-05	0.341691	0.277	0.244	1	0	TMC6
8.68e-05	0.304072	0.436	0.454	1	0	SMDT1
9.28e-05	0.342491	0.489	0.495	1	0	CENPC
9.37e-05	0.151432	0.197	0.3	1	0	TRPM7
0.000102336	0.292806	0.122	0.085	1	0	HIVEP2
0.000111904	0.197953	0.125	0.202	1	0	SLC8B1
0.000112429	0.108358	0.187	0.286	1	0	SINHCAF
0.000120829	0.105362	0.14	0.219	1	0	CNST
0.000128567	0.331516	0.221	0.185	1	0	SPATA13
0.000132197	0.371462	0.131	0.096	1	0	FBXO32
0.000143065	0.118094	0.173	0.26	1	0	CCDC93
0.000152912	0.102023	0.291	0.42	1	0	BRWD1
0.000181285	0.118217	0.119	0.19	1	0	NUP88
0.000195432	0.24183	0.213	0.175	1	0	STK38
0.00020163	0.418377	0.199	0.165	1	0	IRF3
0.000205088	0.528969	0.256	0.22	1	0	CBLB
0.0002159	0.305877	0.474	0.506	1	0	PPP1R2
0.000223054	0.375599	0.122	0.088	1	0	USP9Y
0.000225321	0.40981	0.12	0.086	1	0	RGPD5
0.000238365	0.104632	0.083	0.139	1	0	WDR6
0.000242086	0.106181	0.098	0.159	1	0	SCAMP3
0.000245265	0.160363	0.074	0.127	1	0	LRCH3
0.000282066	0.49509	0.217	0.188	1	0	CDC14A
0.000297143	0.102993	0.221	0.324	1	0	BRD1
0.000306471	0.128074	0.172	0.26	1	0	XPO4
0.000306791	0.270829	0.129	0.094	1	0	RFTN1
0.000325468	0.300263	0.999	0.98	1	0	MT-CYB
0.000336503	0.344385	0.472	0.504	1	0	HEBP2
0.000342852	0.297418	0.146	0.111	1	0	BORCS5
0.000354849	0.303283	0.115	0.082	1	0	APOLD1
0.000357768	0.111951	0.173	0.255	1	0	SHPRH
0.00036502	0.187128	0.276	0.39	1	0	LMAN1
0.000365262	0.130638	0.789	0.822	1	0	PFDN5
0.00038734	0.293065	0.124	0.092	1	0	CEP68
0.000391004	0.333002	0.129	0.096	1	0	CLIP4
0.000407683	0.423845	0.237	0.212	1	0	SPTAN1
0.000462445	0.101976	0.264	0.376	1	0	HERC1
0.000465667	0.359804	0.38	0.37	1	0	IDS
0.000501936	0.249474	0.124	0.091	1	0	BATF
0.000508846	0.19492	0.844	0.81	1	0	GNAS
0.000520907	0.321093	0.357	0.353	1	0	TNFAIP8
0.000568688	0.10088	0.071	0.118	1	0	ZNF264
0.000592655	0.108113	0.087	0.141	1	0	STARD3
0.000648649	0.105154	0.209	0.308	1	0	RNF38
0.000663494	0.361829	0.146	0.117	1	0	ABCC1
0.000663719	0.153238	0.091	0.145	1	0	AC005261.1
0.00072986	0.102064	0.092	0.146	1	0	CUL1
0.000740489	0.313105	0.246	0.225	1	0	MAPKAPK5-AS1
0.000748608	0.16023	0.59	0.618	1	0	SNRPD2
0.000806551	0.144249	0.599	0.607	1	0	ST13
0.000863817	0.116109	0.154	0.229	1	0	ZKSCAN1
0.000874975	0.36271	0.236	0.211	1	0	ZNF721
0.000901167	0.207371	0.175	0.259	1	0	SUPV3L1
0.000940748	0.355091	0.416	0.443	1	0	G3BP2
0.000971262	0.239463	0.516	0.545	1	0	RWDD1
0.00100738	0.119952	0.27	0.381	1	0	TRIM22
0.00103548	0.106316	0.068	0.112	1	0	ZNF880
0.0010357	0.331097	0.246	0.223	1	0	HIVEP1
0.00103742	0.189556	0.232	0.328	1	0	AKNA
0.00106822	0.130939	0.325	0.455	1	0	WDR82
0.00111242	0.13007	0.265	0.372	1	0	ZNF655
0.00119859	0.179216	0.58	0.612	1	0	GMFG
0.00121199	0.433265	0.334	0.341	1	0	SECISBP2
0.00123925	0.251184	0.131	0.1	1	0	MRFAP1L1
0.00125721	0.119812	0.068	0.112	1	0	TUBGCP5
0.00127529	0.199349	0.23	0.333	1	0	ELK4
0.00129164	0.128104	0.478	0.448	1	0	CD52
0.00131209	0.101507	0.122	0.182	1	0	STRADA
0.00139302	0.444663	0.154	0.127	1	0	ZNF506
0.00144637	0.187631	0.151	0.223	1	0	NDE1
0.00161001	0.30487	0.129	0.1	1	0	TARSL2
0.00162732	0.102945	0.095	0.146	1	0	MESD
0.00166525	0.318249	0.174	0.146	1	0	AL354733.3
0.00171022	0.138172	0.14	0.204	1	0	MARS
0.00172543	0.495498	0.142	0.115	1	0	PURA
0.00178721	0.176538	0.29	0.41	1	0	CHD6
0.00196747	0.494198	0.388	0.403	1	0	SNRNP200
0.00199189	0.122009	0.217	0.308	1	0	SAFB2
0.00207275	0.100573	0.327	0.447	1	0	OGT
0.00210848	0.138865	0.453	0.446	1	0	PEBP1
0.00220552	0.105102	0.102	0.153	1	0	DCAF8
0.00231045	0.138554	0.612	0.645	1	0	UBXN1
0.00248645	0.338616	0.145	0.117	1	0	ZBTB4
0.0024932	0.113994	0.135	0.199	1	0	PIK3C3
0.00250163	0.106513	0.127	0.186	1	0	UBR1
0.00251182	0.183278	0.172	0.247	1	0	PTCD3
0.00252898	0.153489	0.607	0.607	1	0	NUCKS1
0.00255425	0.155504	0.236	0.336	1	0	TDG
0.00255497	0.159978	0.723	0.742	1	0	TRA2B
0.00263183	0.113354	0.69	0.693	1	0	TOMM20
0.00270198	0.264369	0.293	0.275	1	0	SNHG12
0.00277368	0.147936	0.169	0.245	1	0	PHTF2
0.00283598	0.180406	0.079	0.123	1	0	AL031777.3
0.00283948	0.182178	0.632	0.677	1	0	HNRNPH3
0.00287649	0.448827	0.349	0.356	1	0	CCNH
0.00292973	0.125954	0.224	0.314	1	0	CCNT1
0.00293715	0.221085	0.475	0.519	1	0	NDUFV2
0.00297262	0.229939	0.483	0.52	1	0	VAMP2
0.00297282	0.155076	0.315	0.444	1	0	SUPT5H
0.00300621	0.4269	0.221	0.204	1	0	GOLGA8A
0.00304325	0.163555	0.224	0.318	1	0	SRP54
0.00304937	0.194957	0.243	0.345	1	0	DIS3
0.00310201	0.108685	0.096	0.144	1	0	MCM3AP
0.00322378	0.132614	0.119	0.089	1	0	MTFP1
0.00329635	0.13962	0.1	0.149	1	0	LRRC8C
0.00335126	0.147932	0.113	0.168	1	0	HEATR1
0.0034863	0.358173	0.554	0.602	1	0	PPP1CB
0.00350123	0.472594	0.284	0.27	1	0	ZBTB20
0.00356224	0.181845	0.232	0.325	1	0	RPS6KA3
0.00360837	0.103643	0.079	0.122	1	0	L3MBTL3
0.00364748	0.133059	0.095	0.142	1	0	RHOT2
0.00374573	0.146777	0.121	0.177	1	0	NAA35
0.00376927	0.323803	0.139	0.11	1	0	NR4A2
0.00380621	0.178608	0.682	0.695	1	0	EIF4B
0.00407203	0.192955	0.127	0.099	1	0	PITPNC1
0.00407731	0.118393	0.154	0.219	1	0	TMC8
0.00421777	0.122882	0.101	0.149	1	0	ERCC6L2
0.00440397	0.174662	0.358	0.494	1	0	RANBP2
0.00447991	0.390129	0.513	0.56	1	0	CLK1
0.00454087	0.120276	0.216	0.305	1	0	COMMD2
0.00460574	0.126421	0.111	0.162	1	0	UCHL5
0.00500053	0.379451	0.166	0.143	1	0	KIAA1147
0.00506299	0.155275	0.613	0.637	1	0	AMD1
0.00515357	0.22749	0.574	0.601	1	0	EIF2S2
0.00527608	0.264968	0.242	0.229	1	0	TECR
0.00531738	0.164187	0.222	0.312	1	0	SRSF1
0.0053218	0.363118	0.201	0.177	1	0	AC016831.7
0.00565672	0.163166	0.1	0.076	1	0	PITPNA-AS1
0.00588642	0.155098	0.752	0.709	1	0	SRSF10
0.00619686	0.223154	0.197	0.275	1	0	TTC37
0.00622955	0.279802	0.106	0.083	1	0	LINC01089
0.00663891	0.128765	0.15	0.21	1	0	DEF6
0.006749	0.21019	0.32	0.434	1	0	RBM26
0.00685626	0.156953	0.081	0.121	1	0	ICE2
0.00690208	0.141079	0.528	0.573	1	0	JAK1
0.00715744	0.220359	0.156	0.134	1	0	HSBP1L1
0.00745249	0.114073	0.146	0.205	1	0	ERGIC2
0.00756722	0.19216	0.801	0.784	1	0	PNISR
0.00757155	0.47992	0.361	0.379	1	0	PHC3
0.0078202	0.380535	0.409	0.452	1	0	SSH2
0.00814295	0.149959	0.068	0.104	1	0	AC139887.2
0.00835448	0.22556	0.113	0.091	1	0	AL355472.1
0.00835696	0.346778	0.134	0.112	1	0	AC092683.1
0.00879046	0.159078	0.198	0.274	1	0	CDS2
0.00881167	0.112978	0.198	0.27	1	0	ZBTB11
0.00918013	0.300741	0.361	0.382	1	0	MRFAP1
0.00940999	0.177882	0.108	0.085	1	0	HMCES
0.00942911	0.309267	0.376	0.396	1	0	ANKRD49
0	2.56698	0.771	0.141	0	1	THBS1
0	2.35164	0.932	0.177	0	1	FCN1
0	2.32654	0.969	0.298	0	1	AC020656.1
0	2.28756	0.934	0.261	0	1	CEBPD
0	2.27452	0.901	0.129	0	1	MAFB
0	2.24346	0.952	0.289	0	1	CST3
0	2.19597	0.965	0.472	0	1	S100A10
0	2.14078	0.942	0.294	0	1	LGALS3
0	2.12491	0.982	0.492	0	1	CEBPB
0	1.79541	0.405	0.023	0	1	CYP1B1
0	1.73505	0.963	0.246	0	1	VCAN
0	1.45403	0.839	0.187	0	1	CD68
0	1.41824	0.894	0.216	0	1	LMNA
0	1.16515	0.777	0.139	0	1	LRP1
0	1.16117	0.786	0.136	0	1	IFI30
0	1.06022	0.604	0.082	0	1	EMP1
0	0.827938	0.645	0.086	0	1	PLBD1
1.92e-305	1.63423	0.946	0.27	4.49e-301	1	CFD
3.72e-305	1.12338	0.796	0.179	8.69e-301	1	STX11
3.58e-301	1.28177	0.771	0.146	8.36e-297	1	CLEC7A
3.13e-295	1.19543	0.624	0.088	7.3e-291	1	CD14
8.57e-294	1.78554	0.932	0.398	2e-289	1	NPC2
9.86e-294	2.4201	0.989	0.58	2.3e-289	1	LYZ
4.37e-292	0.936586	0.67	0.113	1.02e-287	1	CDKN1A
1.97e-290	1.39931	0.895	0.274	4.59e-286	1	TLE3
1.14e-288	0.848284	0.588	0.085	2.67e-284	1	RNASE6
1.21e-287	1.72946	0.948	0.354	2.82e-283	1	TYROBP
3.59e-287	1.43394	0.914	0.299	8.37e-283	1	ARL4A
5.14e-286	1.81084	0.975	0.442	1.2e-281	1	PSAP
2.69e-285	1.6296	0.929	0.298	6.28e-281	1	CSTA
1.9e-282	2.11965	0.948	0.405	4.44e-278	1	LGALS1
4.9e-282	1.30163	0.857	0.23	1.14e-277	1	ANXA2
1.83e-280	2.0964	0.965	0.491	4.26e-276	1	CTSS
1.1e-279	2.66404	0.877	0.311	2.56e-275	1	FABP5
5.53e-279	1.76879	0.948	0.385	1.29e-274	1	JARID2
6.47e-279	2.02423	0.939	0.333	1.51e-274	1	MARCKS
1.77e-278	1.07407	0.785	0.177	4.12e-274	1	RBM47
7.72e-276	1.58084	0.806	0.228	1.8e-271	1	ASPH
2.71e-274	1.68227	0.953	0.495	6.32e-270	1	BRI3
5.85e-274	2.02844	0.975	0.73	1.36e-269	1	S100A6
9.39e-273	1.30476	0.796	0.206	2.19e-268	1	AHR
[truncated: 21,259 more rows]

## Sheet: Table S7
Table S7. scRNA-seq differential analysis of cluster-3 (MNCs) from baseline and EPO tratment samples
[truncated: 753 more rows]

[truncated: 4 more sheets: Table S8, Table S9, Table S10, Table S11]
